# Supplementary material for: Nr2f1a maintains atrial nkx2.5 expression to repress pacemaker identity within venous atrial cardiomyocytes of zebrafish
Source: eLife. 2023 May 15;12:e77408. doi: 10.7554/eLife.77408 (PMC10185342; doi:10.7554/eLife.77408)
Supplement: Supplementary file 1. [file elife-77408-supp1.xlsx]

## Sheet: Integrated RNAseq and ATACseq
ATAC_PEAK_COOR	ATAC_PEAK_FC	GENE_NAME	GENE_FC	GENE-PEAK_DIST(bp)	HIT_COOR	HIT_TF_NAME	HIT_STRAND	HIT_LENGTH	HIT_NORM_SCORE	ATAC_wt	ATAC_nr2f1a mut
chr6:6883127-6883648	-1.13	atg3	1.42	69145	chr6:6883284-6883290	M03840-NR2F1	-	7	0.672	90.6033	41.9411
chr5:51338328-51339286	-1.42	serinc5	7.09	0	chr5:51338617-51338624	M05953-NR2F1	-	8	0.690	84.2611	32.0077
chr5:51338328-51339286	-1.42	serinc5	7.09	0	chr5:51338618-51338624	M03840-NR2F1	-	7	0.668	84.2611	32.0077
chr5:51338328-51339286	-1.42	serinc5	7.09	0	chr5:51338618-51338625	M01984-NR2F6	-	8	0.883	84.2611	32.0077
chr5:51338328-51339286	-1.42	serinc5	7.09	0	chr5:51339102-51339109	M05541-NR2F2	-	8	0.763	84.2611	32.0077
chr6:23841103-23841611	-1.05	sec16b	-1.71	9146	NA	NA	NA	NA	NA	83.355	40.8374
chr8:51903515-51904082	-1.01	cabin1	-2.94	398	NA	NA	NA	NA	NA	83.355	41.9411
chr9:30232305-30232773	-1.16	mid1ip1a	7.66	219671	chr9:30232570-30232576	M03840-NR2F1	-	7	0.611	82.449	37.5262
chr9:30232305-30232773	-1.16	mid1ip1a	7.66	219671	chr9:30232574-30232586	M02591-NR2F1	-	13	0.683	82.449	37.5262
chr9:30232305-30232773	-1.16	mid1ip1a	7.66	219671	chr9:30232574-30232586	M05954-NR2F1	-	13	0.683	82.449	37.5262
chr9:30232305-30232773	-1.16	mid1ip1a	7.66	219671	chr9:30232574-30232588	M03841-NR2F2	-	15	0.696	82.449	37.5262
chr9:30232305-30232773	-1.16	mid1ip1a	7.66	219671	chr9:30232577-30232584	M05953-NR2F1	-	8	0.902	82.449	37.5262
chr9:30232305-30232773	-1.16	mid1ip1a	7.66	219671	chr9:30232577-30232586	M06478-NR2F2	-	10	0.606	82.449	37.5262
chr9:30232305-30232773	-1.16	mid1ip1a	7.66	219671	chr9:30232578-30232584	M03840-NR2F1	-	7	0.937	82.449	37.5262
chr9:30232305-30232773	-1.16	mid1ip1a	7.66	219671	chr9:30232578-30232585	M01984-NR2F6	-	8	0.935	82.449	37.5262
chr9:30232305-30232773	-1.16	mid1ip1a	7.66	219671	chr9:30232578-30232585	M05541-NR2F2	-	8	0.624	82.449	37.5262
chr9:30232305-30232773	-1.16	mid1ip1a	7.66	219671	chr9:30232596-30232610	M06479-NR2F2	-	15	0.902	82.449	37.5262
chr9:30232305-30232773	-1.16	mid1ip1a	7.66	219671	chr9:30232598-30232607	M05542-NR2F2	-	10	0.879	82.449	37.5262
chr9:30232305-30232773	-1.16	mid1ip1a	7.66	219671	chr9:30232603-30232617	M06479-NR2F2	-	15	0.706	82.449	37.5262
chr9:30232305-30232773	-1.16	mid1ip1a	7.66	219671	chr9:30232605-30232614	M05542-NR2F2	-	10	0.646	82.449	37.5262
chr9:30232305-30232773	-1.16	srpx	6.72	250517	chr9:30232570-30232576	M03840-NR2F1	-	7	0.611	82.449	37.5262
chr9:30232305-30232773	-1.16	srpx	6.72	250517	chr9:30232574-30232586	M02591-NR2F1	-	13	0.683	82.449	37.5262
chr9:30232305-30232773	-1.16	srpx	6.72	250517	chr9:30232574-30232586	M05954-NR2F1	-	13	0.683	82.449	37.5262
chr9:30232305-30232773	-1.16	srpx	6.72	250517	chr9:30232574-30232588	M03841-NR2F2	-	15	0.696	82.449	37.5262
chr9:30232305-30232773	-1.16	srpx	6.72	250517	chr9:30232577-30232584	M05953-NR2F1	-	8	0.902	82.449	37.5262
chr9:30232305-30232773	-1.16	srpx	6.72	250517	chr9:30232577-30232586	M06478-NR2F2	-	10	0.606	82.449	37.5262
chr9:30232305-30232773	-1.16	srpx	6.72	250517	chr9:30232578-30232584	M03840-NR2F1	-	7	0.937	82.449	37.5262
chr9:30232305-30232773	-1.16	srpx	6.72	250517	chr9:30232578-30232585	M01984-NR2F6	-	8	0.935	82.449	37.5262
chr9:30232305-30232773	-1.16	srpx	6.72	250517	chr9:30232578-30232585	M05541-NR2F2	-	8	0.624	82.449	37.5262
chr9:30232305-30232773	-1.16	srpx	6.72	250517	chr9:30232596-30232610	M06479-NR2F2	-	15	0.902	82.449	37.5262
chr9:30232305-30232773	-1.16	srpx	6.72	250517	chr9:30232598-30232607	M05542-NR2F2	-	10	0.879	82.449	37.5262
chr9:30232305-30232773	-1.16	srpx	6.72	250517	chr9:30232603-30232617	M06479-NR2F2	-	15	0.706	82.449	37.5262
chr9:30232305-30232773	-1.16	srpx	6.72	250517	chr9:30232605-30232614	M05542-NR2F2	-	10	0.646	82.449	37.5262
chr2:58695683-58696155	-1.04	sugp1	4.15	111774	chr2:58695692-58695704	M02591-NR2F1	-	13	0.688	82.449	40.8374
chr2:58695683-58696155	-1.04	sugp1	4.15	111774	chr2:58695692-58695704	M05954-NR2F1	-	13	0.688	82.449	40.8374
chr2:58695683-58696155	-1.04	sugp1	4.15	111774	chr2:58695692-58695706	M03841-NR2F2	-	15	0.801	82.449	40.8374
chr2:58695683-58696155	-1.04	sugp1	4.15	111774	chr2:58695695-58695702	M05953-NR2F1	-	8	0.806	82.449	40.8374
chr2:58695683-58696155	-1.04	sugp1	4.15	111774	chr2:58695695-58695704	M06478-NR2F2	-	10	0.827	82.449	40.8374
chr2:58695683-58696155	-1.04	sugp1	4.15	111774	chr2:58695696-58695702	M03840-NR2F1	-	7	1.000	82.449	40.8374
chr2:58695683-58696155	-1.04	sugp1	4.15	111774	chr2:58695696-58695703	M01984-NR2F6	-	8	0.925	82.449	40.8374
chr2:58695683-58696155	-1.04	sugp1	4.15	111774	chr2:58695696-58695703	M05541-NR2F2	-	8	1.000	82.449	40.8374
chr2:58695683-58696155	-1.04	sugp1	4.15	111774	chr2:58695696-58695704	M06477-NR2F1	-	9	0.818	82.449	40.8374
chr2:58695683-58696155	-1.04	sugp1	4.15	111774	chr2:58695696-58695707	M06476-NR2F1	-	12	0.629	82.449	40.8374
chr2:58695683-58696155	-1.04	sugp1	4.15	111774	chr2:58695893-58695899	M03840-NR2F1	-	7	0.672	82.449	40.8374
chr2:58695683-58696155	-1.04	sugp1	4.15	111774	chr2:58695963-58695977	M06479-NR2F2	-	15	0.903	82.449	40.8374
chr2:58695683-58696155	-1.04	sugp1	4.15	111774	chr2:58695965-58695974	M05542-NR2F2	-	10	1.000	82.449	40.8374
chr11:33350904-33351411	-1.05	lims1	4.15	1596	chr11:33350966-33350973	M05953-NR2F1	-	8	0.650	78.8249	38.6299
chr11:33350904-33351411	-1.05	lims1	4.15	1596	chr11:33350967-33350973	M03840-NR2F1	-	7	0.798	78.8249	38.6299
chr11:33350904-33351411	-1.05	lims1	4.15	1596	chr11:33350967-33350974	M01984-NR2F6	-	8	0.869	78.8249	38.6299
chr11:33350904-33351411	-1.05	lims1	4.15	1596	chr11:33351177-33351185	M06477-NR2F1	-	9	0.639	78.8249	38.6299
chr9:4242819-4243673	-1.06	kalrna	6.21	40623	NA	NA	NA	NA	NA	77.0128	37.5262
chr6:38971868-38972813	-1.49	hdac7b	-4.65	38024	chr6:38972669-38972676	M05541-NR2F2	-	8	0.740	73.3887	26.4891
chr14:30397570-30398281	-1.08	ccdc85b	2.49	2874	chr14:30397720-30397726	M03840-NR2F1	-	7	0.672	73.3887	35.3188
chr14:30397570-30398281	-1.08	ccdc85b	2.49	2874	chr14:30397980-30397987	M05541-NR2F2	-	8	0.623	73.3887	35.3188
chr14:30397570-30398281	-1.08	yif1a	-1.67	12821	chr14:30397720-30397726	M03840-NR2F1	-	7	0.672	73.3887	35.3188
chr14:30397570-30398281	-1.08	yif1a	-1.67	12821	chr14:30397980-30397987	M05541-NR2F2	-	8	0.623	73.3887	35.3188
chr7:73277825-73278517	-1.10	arhgef40	-7.08	2045	chr7:73278047-73278053	M03840-NR2F1	-	7	0.672	69.7645	33.1114
chr14:16344325-16344938	-1.03	mgat4b	-1.64	31752	NA	NA	NA	NA	NA	68.8585	34.2151
chr23:5517529-5518180	-1.19	tead3a	3.92	45186	chr23:5517606-5517613	M01984-NR2F6	-	8	0.773	67.0464	29.8002
chr23:5517529-5518180	-1.19	tead3a	3.92	45186	chr23:5517824-5517833	M05542-NR2F2	-	10	0.637	67.0464	29.8002
chr23:5517529-5518180	-1.19	tead3a	3.92	45186	chr23:5517846-5517853	M05953-NR2F1	-	8	0.663	67.0464	29.8002
chr23:5517529-5518180	-1.19	tead3a	3.92	45186	chr23:5517847-5517853	M03840-NR2F1	-	7	0.798	67.0464	29.8002
chr23:5517529-5518180	-1.19	tead3a	3.92	45186	chr23:5517847-5517854	M01984-NR2F6	-	8	0.878	67.0464	29.8002
chr23:5517529-5518180	-1.19	tead3a	3.92	45186	chr23:5517847-5517854	M05541-NR2F2	-	8	0.757	67.0464	29.8002
chr13:22150482-22151412	-1.10	usp54a	5.51	0	chr13:22150555-22150562	M01984-NR2F6	-	8	0.732	65.2344	30.904
chr13:22150482-22151412	-1.10	usp54a	5.51	0	chr13:22150913-22150919	M03840-NR2F1	-	7	0.636	65.2344	30.904
chr13:22150482-22151412	-1.10	usp54a	5.51	0	chr13:22150913-22150920	M05541-NR2F2	-	8	0.793	65.2344	30.904
chr13:22150482-22151412	-1.10	usp54a	5.51	0	chr13:22151323-22151330	M05541-NR2F2	-	8	0.623	65.2344	30.904
chr2:10301436-10301857	-1.10	ahsg2	-8.90	34668	chr2:10301507-10301516	M05542-NR2F2	-	10	0.615	65.2344	30.904
chr2:10301436-10301857	-1.10	ahsg2	-8.90	34668	chr2:10301795-10301802	M05541-NR2F2	-	8	0.633	65.2344	30.904
chr2:10301436-10301857	-1.10	sec22ba	5.97	115596	chr2:10301507-10301516	M05542-NR2F2	-	10	0.615	65.2344	30.904
chr2:10301436-10301857	-1.10	sec22ba	5.97	115596	chr2:10301795-10301802	M05541-NR2F2	-	8	0.633	65.2344	30.904
chr18:26736806-26737652	-1.15	malt3	6.26	3985	NA	NA	NA	NA	NA	62.5163	28.6965
chr18:26736806-26737652	-1.15	znf592	-1.97	79005	NA	NA	NA	NA	NA	62.5163	28.6965
chr14:935954-936575	-1.56	f8	-8.93	52335	chr14:936017-936024	M05541-NR2F2	-	8	0.702	60.7042	20.9705
chr18:15558055-15558463	-1.48	ppfibp1b	-1.29	0	NA	NA	NA	NA	NA	60.7042	22.0743
chr17:9763214-9763629	-1.10	eapp	2.12	31945	NA	NA	NA	NA	NA	60.7042	28.6965
chr3:39896480-39896942	-1.00	llgl1	2.48	12528	chr3:39896625-39896632	M05541-NR2F2	-	8	0.623	60.7042	30.904
chr3:39896480-39896942	-1.00	llgl1	2.48	12528	chr3:39896646-39896652	M03840-NR2F1	-	7	0.674	60.7042	30.904
chr3:39896480-39896942	-1.00	llgl1	2.48	12528	chr3:39896646-39896654	M06477-NR2F1	-	9	0.710	60.7042	30.904
chr5:21548714-21549445	-1.14	zc4h2	1.31	20465	chr5:21549083-21549090	M05541-NR2F2	-	8	0.702	59.7982	27.5928
chr5:21548714-21549445	-1.14	las1l	7.97	62005	chr5:21549083-21549090	M05541-NR2F2	-	8	0.702	59.7982	27.5928
chr25:12771368-12771812	-1.03	uba2	1.44	43234	NA	NA	NA	NA	NA	59.7982	29.8002
chr7:24781854-24782263	-1.06	LOC100007087	-2.40	0	NA	NA	NA	NA	NA	58.8921	28.6965
chr11:31166737-31167249	-1.00	sipa1l2	2.69	2238	NA	NA	NA	NA	NA	58.8921	29.8002
chr13:42536457-42536908	-1.21	mlh1	4.11	44874	chr13:42536655-42536662	M05953-NR2F1	-	8	0.769	57.9861	25.3854
chr13:42536457-42536908	-1.21	mlh1	4.11	44874	chr13:42536656-42536662	M03840-NR2F1	-	7	0.668	57.9861	25.3854
chr13:42536457-42536908	-1.21	mlh1	4.11	44874	chr13:42536656-42536663	M01984-NR2F6	-	8	0.913	57.9861	25.3854
chr24:14505553-14506065	-1.09	zfhx2	1.93	57626	chr24:14505599-14505613	M06479-NR2F2	-	15	0.645	57.9861	27.5928
chr24:14505553-14506065	-1.09	zfhx2	1.93	57626	chr24:14505601-14505610	M05542-NR2F2	-	10	0.822	57.9861	27.5928
chr24:14505553-14506065	-1.09	zfhx2	1.93	57626	chr24:14505623-14505630	M05541-NR2F2	-	8	0.623	57.9861	27.5928
chr24:14505553-14506065	-1.09	zfhx2	1.93	57626	chr24:14505896-14505905	M06478-NR2F2	-	10	0.645	57.9861	27.5928
chr24:14505553-14506065	-1.09	zfhx2	1.93	57626	chr24:14505897-14505904	M01984-NR2F6	-	8	0.729	57.9861	27.5928
chr24:14505553-14506065	-1.09	zfhx2	1.93	57626	chr24:14505897-14505905	M06477-NR2F1	-	9	0.645	57.9861	27.5928
chr24:14505553-14506065	-1.09	zfhx2	1.93	57626	chr24:14505897-14505908	M06476-NR2F1	-	12	0.637	57.9861	27.5928
chr12:26903369-26903933	-1.04	znf438	5.51	27250	NA	NA	NA	NA	NA	57.9861	28.6965
chr24:32263759-32264277	-1.07	vim	5.21	7	chr24:32263967-32263974	M05541-NR2F2	-	8	0.653	57.0801	27.5928
chr9:47807225-47807837	-1.01	tns1b	-2.44	1509	chr9:47807640-47807646	M03840-NR2F1	-	7	0.672	57.0801	28.6965
chr9:47807225-47807837	-1.01	tns1b	-2.44	1509	chr9:47807640-47807647	M05541-NR2F2	-	8	0.770	57.0801	28.6965
chr6:33469103-33469460	-1.01	pik3r3b	3.11	22622	chr6:33469358-33469372	M06479-NR2F2	-	15	0.672	57.0801	28.6965
chr6:33469103-33469460	-1.01	pik3r3b	3.11	22622	chr6:33469360-33469369	M05542-NR2F2	-	10	0.615	57.0801	28.6965
chr6:33469103-33469460	-1.01	pik3r3b	3.11	22622	chr6:33469379-33469386	M05953-NR2F1	-	8	0.784	57.0801	28.6965
chr6:33469103-33469460	-1.01	pik3r3b	3.11	22622	chr6:33469379-33469388	M06478-NR2F2	-	10	0.645	57.0801	28.6965
chr6:33469103-33469460	-1.01	pik3r3b	3.11	22622	chr6:33469380-33469386	M03840-NR2F1	-	7	0.729	57.0801	28.6965
chr6:33469103-33469460	-1.01	pik3r3b	3.11	22622	chr6:33469380-33469387	M01984-NR2F6	-	8	0.871	57.0801	28.6965
chr6:33469103-33469460	-1.01	pik3r3b	3.11	22622	chr6:33469380-33469388	M06477-NR2F1	-	9	0.661	57.0801	28.6965
chr6:33469103-33469460	-1.01	pik3r3b	3.11	22622	chr6:33469420-33469427	M05953-NR2F1	-	8	0.825	57.0801	28.6965
chr6:33469103-33469460	-1.01	pik3r3b	3.11	22622	chr6:33469421-33469427	M03840-NR2F1	-	7	0.870	57.0801	28.6965
chr6:33469103-33469460	-1.01	pik3r3b	3.11	22622	chr6:33469421-33469428	M01984-NR2F6	-	8	0.933	57.0801	28.6965
chr8:28409825-28410182	-1.01	adipor1b	5.57	35502	NA	NA	NA	NA	NA	57.0801	28.6965
chr8:28409825-28410182	-1.01	LOC108178999	-1.99	71788	NA	NA	NA	NA	NA	57.0801	28.6965
chr20:40253692-40254349	-1.23	smpdl3a	-10.21	175354	chr20:40253882-40253889	M01984-NR2F6	-	8	0.847	56.174	24.2817
chr20:40253692-40254349	-1.23	smpdl3a	-10.21	175354	chr20:40253974-40253981	M05953-NR2F1	-	8	0.650	56.174	24.2817
chr20:40253692-40254349	-1.23	smpdl3a	-10.21	175354	chr20:40253975-40253981	M03840-NR2F1	-	7	0.798	56.174	24.2817
chr20:40253692-40254349	-1.23	smpdl3a	-10.21	175354	chr20:40253975-40253982	M01984-NR2F6	-	8	0.869	56.174	24.2817
chr19:24914347-24914839	-1.17	mtx1b	3.39	13813	NA	NA	NA	NA	NA	56.174	25.3854
chr19:24914347-24914839	-1.17	polr3gla	5.11	46951	NA	NA	NA	NA	NA	56.174	25.3854
chr19:24914347-24914839	-1.17	thbs3b	3.97	54908	NA	NA	NA	NA	NA	56.174	25.3854
chr25:35493920-35494492	-1.11	snx20	-3.53	35623	chr25:35493969-35493976	M05953-NR2F1	-	8	0.750	56.174	26.4891
chr25:35493920-35494492	-1.11	snx20	-3.53	35623	chr25:35493970-35493976	M03840-NR2F1	-	7	0.798	56.174	26.4891
chr25:35493920-35494492	-1.11	snx20	-3.53	35623	chr25:35493970-35493977	M01984-NR2F6	-	8	0.851	56.174	26.4891
chr25:35493920-35494492	-1.11	snx20	-3.53	35623	chr25:35494051-35494058	M05541-NR2F2	-	8	0.688	56.174	26.4891
chr25:35493920-35494492	-1.11	snx20	-3.53	35623	chr25:35494280-35494287	M01984-NR2F6	-	8	0.732	56.174	26.4891
chr9:6726894-6727700	-1.11	pou3f3a	4.25	43181	chr9:6727249-6727263	M06479-NR2F2	-	15	0.888	56.174	26.4891
chr9:6726894-6727700	-1.11	pou3f3a	4.25	43181	chr9:6727251-6727260	M05542-NR2F2	-	10	1.000	56.174	26.4891
chr9:6726894-6727700	-1.11	pou3f3a	4.25	43181	chr9:6727650-6727657	M01984-NR2F6	-	8	0.808	56.174	26.4891
chr7:28386746-28387429	-1.05	adgrg1	6.09	11840	NA	NA	NA	NA	NA	56.174	27.5928
chr3:26017000-26017635	-1.28	ypel3	7.97	37647	chr3:26017156-26017163	M05541-NR2F2	-	8	0.688	55.268	23.178
chr3:26017000-26017635	-1.28	ypel3	7.97	37647	chr3:26017156-26017169	M03927-NR2F6	-	14	0.670	55.268	23.178
chr3:26017000-26017635	-1.28	ypel3	7.97	37647	chr3:26017500-26017506	M03840-NR2F1	-	7	0.636	55.268	23.178
chr3:26017000-26017635	-1.28	ypel3	7.97	37647	chr3:26017500-26017507	M05541-NR2F2	-	8	0.608	55.268	23.178
chr3:26017000-26017635	-1.28	nudt9	3.29	74868	chr3:26017156-26017163	M05541-NR2F2	-	8	0.688	55.268	23.178
chr3:26017000-26017635	-1.28	nudt9	3.29	74868	chr3:26017156-26017169	M03927-NR2F6	-	14	0.670	55.268	23.178
chr3:26017000-26017635	-1.28	nudt9	3.29	74868	chr3:26017500-26017506	M03840-NR2F1	-	7	0.636	55.268	23.178
chr3:26017000-26017635	-1.28	nudt9	3.29	74868	chr3:26017500-26017507	M05541-NR2F2	-	8	0.608	55.268	23.178
chr3:26017000-26017635	-1.28	atad5a	3.39	95856	chr3:26017156-26017163	M05541-NR2F2	-	8	0.688	55.268	23.178
chr3:26017000-26017635	-1.28	atad5a	3.39	95856	chr3:26017156-26017169	M03927-NR2F6	-	14	0.670	55.268	23.178
chr3:26017000-26017635	-1.28	atad5a	3.39	95856	chr3:26017500-26017506	M03840-NR2F1	-	7	0.636	55.268	23.178
chr3:26017000-26017635	-1.28	atad5a	3.39	95856	chr3:26017500-26017507	M05541-NR2F2	-	8	0.608	55.268	23.178
chr22:29243831-29244378	-1.08	ncf4	5.68	11055	chr22:29244319-29244328	M05542-NR2F2	-	10	0.603	55.268	26.4891
chr5:12336649-12337394	-1.18	pes	-1.44	0	NA	NA	NA	NA	NA	54.362	24.2817
chr5:12336649-12337394	-1.18	p2rx2	6.03	12991	NA	NA	NA	NA	NA	54.362	24.2817
chr5:29870075-29870698	-1.18	hmbsa	-1.26	47584	NA	NA	NA	NA	NA	54.362	24.2817
chr17:28014447-28014895	-1.06	luzp1	-1.54	3485	chr17:28014652-28014659	M05953-NR2F1	-	8	0.670	54.362	26.4891
chr17:28014447-28014895	-1.06	luzp1	-1.54	3485	chr17:28014653-28014659	M03840-NR2F1	-	7	0.798	54.362	26.4891
chr17:28014447-28014895	-1.06	luzp1	-1.54	3485	chr17:28014653-28014660	M01984-NR2F6	-	8	0.848	54.362	26.4891
chr7:69873064-69873540	-1.06	adgra3	4.92	7439	chr7:69873106-69873118	M02591-NR2F1	-	13	0.816	54.362	26.4891
chr7:69873064-69873540	-1.06	adgra3	4.92	7439	chr7:69873106-69873118	M05954-NR2F1	-	13	0.816	54.362	26.4891
chr7:69873064-69873540	-1.06	adgra3	4.92	7439	chr7:69873106-69873120	M03841-NR2F2	-	15	0.661	54.362	26.4891
chr7:69873064-69873540	-1.06	adgra3	4.92	7439	chr7:69873109-69873116	M05953-NR2F1	-	8	1.000	54.362	26.4891
chr7:69873064-69873540	-1.06	adgra3	4.92	7439	chr7:69873109-69873118	M06478-NR2F2	-	10	0.652	54.362	26.4891
chr7:69873064-69873540	-1.06	adgra3	4.92	7439	chr7:69873110-69873116	M03840-NR2F1	-	7	0.807	54.362	26.4891
chr7:69873064-69873540	-1.06	adgra3	4.92	7439	chr7:69873110-69873117	M01984-NR2F6	-	8	1.000	54.362	26.4891
chr7:69873064-69873540	-1.06	adgra3	4.92	7439	chr7:69873110-69873117	M05541-NR2F2	-	8	0.627	54.362	26.4891
chr7:69873064-69873540	-1.06	adgra3	4.92	7439	chr7:69873110-69873118	M06477-NR2F1	-	9	0.632	54.362	26.4891
chr7:69873064-69873540	-1.06	adgra3	4.92	7439	chr7:69873183-69873197	M06479-NR2F2	-	15	0.611	54.362	26.4891
chr7:69873064-69873540	-1.06	adgra3	4.92	7439	chr7:69873185-69873194	M05542-NR2F2	-	10	0.816	54.362	26.4891
chr7:69873064-69873540	-1.06	adgra3	4.92	7439	chr7:69873416-69873423	M01984-NR2F6	-	8	0.732	54.362	26.4891
chr7:69873064-69873540	-1.06	adgra3	4.92	7439	chr7:69873435-69873442	M05541-NR2F2	-	8	0.633	54.362	26.4891
chr3:42263969-42264377	-1.06	tmem184a	1.62	12376	NA	NA	NA	NA	NA	54.362	26.4891
chr2:30208255-30208804	-1.00	ube2w	-2.07	1410	chr2:30208406-30208413	M05953-NR2F1	-	8	0.670	54.362	27.5928
chr2:30208255-30208804	-1.00	ube2w	-2.07	1410	chr2:30208407-30208413	M03840-NR2F1	-	7	0.798	54.362	27.5928
chr2:30208255-30208804	-1.00	ube2w	-2.07	1410	chr2:30208407-30208414	M01984-NR2F6	-	8	0.851	54.362	27.5928
chr2:30208255-30208804	-1.00	rpl7	-1.07	9456	chr2:30208406-30208413	M05953-NR2F1	-	8	0.670	54.362	27.5928
chr2:30208255-30208804	-1.00	rpl7	-1.07	9456	chr2:30208407-30208413	M03840-NR2F1	-	7	0.798	54.362	27.5928
chr2:30208255-30208804	-1.00	rpl7	-1.07	9456	chr2:30208407-30208414	M01984-NR2F6	-	8	0.851	54.362	27.5928
chr2:30208255-30208804	-1.00	trpa1a	4.06	56343	chr2:30208406-30208413	M05953-NR2F1	-	8	0.670	54.362	27.5928
chr2:30208255-30208804	-1.00	trpa1a	4.06	56343	chr2:30208407-30208413	M03840-NR2F1	-	7	0.798	54.362	27.5928
chr2:30208255-30208804	-1.00	trpa1a	4.06	56343	chr2:30208407-30208414	M01984-NR2F6	-	8	0.851	54.362	27.5928
chr6:23803779-23804461	-1.37	sec16b	-1.71	0	NA	NA	NA	NA	NA	53.4559	20.9705
chr6:32736630-32737309	-1.23	mafaa	-1.09	17803	chr6:32736754-32736768	M06479-NR2F2	-	15	0.864	53.4559	23.178
chr6:32736630-32737309	-1.23	mafaa	-1.09	17803	chr6:32736756-32736765	M05542-NR2F2	-	10	0.887	53.4559	23.178
chr6:32736630-32737309	-1.23	mafaa	-1.09	17803	chr6:32737189-32737196	M01984-NR2F6	-	8	0.734	53.4559	23.178
chr6:32736630-32737309	-1.23	mafaa	-1.09	17803	chr6:32737268-32737275	M05953-NR2F1	-	8	0.900	53.4559	23.178
chr6:32736630-32737309	-1.23	mafaa	-1.09	17803	chr6:32737269-32737275	M03840-NR2F1	-	7	0.807	53.4559	23.178
chr6:32736630-32737309	-1.23	mafaa	-1.09	17803	chr6:32737269-32737276	M01984-NR2F6	-	8	0.970	53.4559	23.178
chr20:366171-366504	-1.23	wisp3	5.76	69366	chr20:366188-366195	M05541-NR2F2	-	8	0.744	53.4559	23.178
chr20:366171-366504	-1.23	wisp3	5.76	69366	chr20:366329-366336	M05953-NR2F1	-	8	0.665	53.4559	23.178
chr20:366171-366504	-1.23	wisp3	5.76	69366	chr20:366330-366336	M03840-NR2F1	-	7	0.859	53.4559	23.178
chr20:366171-366504	-1.23	wisp3	5.76	69366	chr20:366330-366337	M01984-NR2F6	-	8	0.808	53.4559	23.178
chr20:366171-366504	-1.23	tube1	6.26	77113	chr20:366188-366195	M05541-NR2F2	-	8	0.744	53.4559	23.178
chr20:366171-366504	-1.23	tube1	6.26	77113	chr20:366329-366336	M05953-NR2F1	-	8	0.665	53.4559	23.178
chr20:366171-366504	-1.23	tube1	6.26	77113	chr20:366330-366336	M03840-NR2F1	-	7	0.859	53.4559	23.178
chr20:366171-366504	-1.23	tube1	6.26	77113	chr20:366330-366337	M01984-NR2F6	-	8	0.808	53.4559	23.178
chr1:599278-599850	-1.10	jam2a	4.82	0	chr1:599817-599824	M05953-NR2F1	-	8	0.921	53.4559	25.3854
chr1:599278-599850	-1.10	jam2a	4.82	0	chr1:599817-599826	M06478-NR2F2	-	10	0.644	53.4559	25.3854
chr1:599278-599850	-1.10	jam2a	4.82	0	chr1:599818-599824	M03840-NR2F1	-	7	0.807	53.4559	25.3854
chr1:599278-599850	-1.10	jam2a	4.82	0	chr1:599818-599825	M01984-NR2F6	-	8	0.970	53.4559	25.3854
chr1:599278-599850	-1.10	atp5j	-1.11	15298	chr1:599817-599824	M05953-NR2F1	-	8	0.921	53.4559	25.3854
chr1:599278-599850	-1.10	atp5j	-1.11	15298	chr1:599817-599826	M06478-NR2F2	-	10	0.644	53.4559	25.3854
chr1:599278-599850	-1.10	atp5j	-1.11	15298	chr1:599818-599824	M03840-NR2F1	-	7	0.807	53.4559	25.3854
chr1:599278-599850	-1.10	atp5j	-1.11	15298	chr1:599818-599825	M01984-NR2F6	-	8	0.970	53.4559	25.3854
chr18:20108186-20108816	-1.20	uacaa	6.59	13549	NA	NA	NA	NA	NA	52.5499	23.178
chr18:21045496-21046112	-1.20	arpin	-2.61	35829	chr18:21045600-21045606	M03840-NR2F1	-	7	0.636	52.5499	23.178
chr18:21045496-21046112	-1.20	arpin	-2.61	35829	chr18:21045730-21045737	M05541-NR2F2	-	8	0.688	52.5499	23.178
chr18:21045496-21046112	-1.20	arpin	-2.61	35829	chr18:21045932-21045938	M03840-NR2F1	-	7	0.674	52.5499	23.178
chr23:9192471-9193086	-1.14	ccm2l	-7.63	45634	chr23:9192832-9192838	M03840-NR2F1	-	7	0.674	52.5499	24.2817
chr23:9192471-9193086	-1.14	ccm2l	-7.63	45634	chr23:9192898-9192907	M05542-NR2F2	-	10	0.614	52.5499	24.2817
chr23:9192471-9193086	-1.14	ccm2l	-7.63	45634	chr23:9193019-9193026	M05953-NR2F1	-	8	0.817	52.5499	24.2817
chr23:9192471-9193086	-1.14	ccm2l	-7.63	45634	chr23:9193020-9193026	M03840-NR2F1	-	7	0.870	52.5499	24.2817
chr23:9192471-9193086	-1.14	ccm2l	-7.63	45634	chr23:9193020-9193027	M01984-NR2F6	-	8	0.930	52.5499	24.2817
chr23:9192471-9193086	-1.14	ccm2l	-7.63	45634	chr23:9193037-9193044	M05953-NR2F1	-	8	0.900	52.5499	24.2817
chr23:9192471-9193086	-1.14	ccm2l	-7.63	45634	chr23:9193038-9193044	M03840-NR2F1	-	7	0.807	52.5499	24.2817
chr23:9192471-9193086	-1.14	ccm2l	-7.63	45634	chr23:9193038-9193045	M01984-NR2F6	-	8	0.972	52.5499	24.2817
chr3:53443031-53443605	-1.18	rdh8a	5.97	0	chr3:53443380-53443392	M02591-NR2F1	-	13	0.605	51.6439	23.178
chr3:53443031-53443605	-1.18	rdh8a	5.97	0	chr3:53443380-53443392	M05954-NR2F1	-	13	0.605	51.6439	23.178
chr3:53443031-53443605	-1.18	rdh8a	5.97	0	chr3:53443383-53443390	M05953-NR2F1	-	8	0.894	51.6439	23.178
chr3:53443031-53443605	-1.18	rdh8a	5.97	0	chr3:53443383-53443392	M06478-NR2F2	-	10	0.690	51.6439	23.178
chr3:53443031-53443605	-1.18	rdh8a	5.97	0	chr3:53443384-53443390	M03840-NR2F1	-	7	0.937	51.6439	23.178
chr3:53443031-53443605	-1.18	rdh8a	5.97	0	chr3:53443384-53443391	M01984-NR2F6	-	8	0.965	51.6439	23.178
chr3:53443031-53443605	-1.18	rdh8a	5.97	0	chr3:53443384-53443391	M05541-NR2F2	-	8	0.860	51.6439	23.178
chr3:53443031-53443605	-1.18	rdh8a	5.97	0	chr3:53443384-53443392	M06477-NR2F1	-	9	0.709	51.6439	23.178
chr21:45548953-45549319	-1.18	ddx46	2.20	26186	NA	NA	NA	NA	NA	51.6439	23.178
chr17:8866391-8866969	-1.46	akap6	3.27	5361	chr17:8866662-8866669	M05953-NR2F1	-	8	0.650	50.7378	18.7631
chr17:8866391-8866969	-1.46	akap6	3.27	5361	chr17:8866663-8866669	M03840-NR2F1	-	7	0.798	50.7378	18.7631
chr17:8866391-8866969	-1.46	akap6	3.27	5361	chr17:8866663-8866670	M01984-NR2F6	-	8	0.851	50.7378	18.7631
chr12:25918986-25919602	-1.30	bmpr1ab	6.59	7339	chr12:25919034-25919043	M06478-NR2F2	-	10	0.611	50.7378	20.9705
chr12:25918986-25919602	-1.30	bmpr1ab	6.59	7339	chr12:25919035-25919043	M06477-NR2F1	-	9	0.639	50.7378	20.9705
chr12:25918986-25919602	-1.30	bmpr1ab	6.59	7339	chr12:25919092-25919099	M05541-NR2F2	-	8	0.633	50.7378	20.9705
chr12:25918986-25919602	-1.30	bmpr1ab	6.59	7339	chr12:25919247-25919259	M02591-NR2F1	-	13	0.610	50.7378	20.9705
chr12:25918986-25919602	-1.30	bmpr1ab	6.59	7339	chr12:25919247-25919259	M05954-NR2F1	-	13	0.610	50.7378	20.9705
chr12:25918986-25919602	-1.30	bmpr1ab	6.59	7339	chr12:25919247-25919261	M03841-NR2F2	-	15	0.736	50.7378	20.9705
chr12:25918986-25919602	-1.30	bmpr1ab	6.59	7339	chr12:25919250-25919257	M05953-NR2F1	-	8	0.902	50.7378	20.9705
chr12:25918986-25919602	-1.30	bmpr1ab	6.59	7339	chr12:25919250-25919259	M06478-NR2F2	-	10	0.885	50.7378	20.9705
chr12:25918986-25919602	-1.30	bmpr1ab	6.59	7339	chr12:25919251-25919257	M03840-NR2F1	-	7	0.937	50.7378	20.9705
chr12:25918986-25919602	-1.30	bmpr1ab	6.59	7339	chr12:25919251-25919258	M01984-NR2F6	-	8	0.965	50.7378	20.9705
chr12:25918986-25919602	-1.30	bmpr1ab	6.59	7339	chr12:25919251-25919258	M05541-NR2F2	-	8	0.860	50.7378	20.9705
chr12:25918986-25919602	-1.30	bmpr1ab	6.59	7339	chr12:25919251-25919259	M06477-NR2F1	-	9	0.891	50.7378	20.9705
chr12:25918986-25919602	-1.30	bmpr1ab	6.59	7339	chr12:25919251-25919262	M06476-NR2F1	-	12	0.882	50.7378	20.9705
chr12:25918986-25919602	-1.30	bmpr1ab	6.59	7339	chr12:25919307-25919314	M05541-NR2F2	-	8	0.730	50.7378	20.9705
chr12:25918986-25919602	-1.30	bmpr1ab	6.59	7339	chr12:25919307-25919315	M06477-NR2F1	-	9	0.633	50.7378	20.9705
chr12:25918986-25919602	-1.30	bmpr1ab	6.59	7339	chr12:25919570-25919577	M05541-NR2F2	-	8	0.706	50.7378	20.9705
chr11:44760171-44760573	-1.15	syngr2b	-1.50	3412	NA	NA	NA	NA	NA	50.7378	23.178
chr11:44760171-44760573	-1.15	LOC101886098	6.83	14736	NA	NA	NA	NA	NA	50.7378	23.178
chr25:10636334-10636933	-1.15	ap3s2	-1.29	59772	chr25:10636392-10636399	M05953-NR2F1	-	8	0.705	50.7378	23.178
chr25:10636334-10636933	-1.15	ap3s2	-1.29	59772	chr25:10636393-10636399	M03840-NR2F1	-	7	0.729	50.7378	23.178
chr25:10636334-10636933	-1.15	ap3s2	-1.29	59772	chr25:10636393-10636400	M01984-NR2F6	-	8	0.841	50.7378	23.178
chr25:10636334-10636933	-1.15	ap3s2	-1.29	59772	chr25:10636803-10636817	M06479-NR2F2	-	15	0.776	50.7378	23.178
chr25:10636334-10636933	-1.15	ap3s2	-1.29	59772	chr25:10636805-10636814	M05542-NR2F2	-	10	0.838	50.7378	23.178
chr25:10636334-10636933	-1.15	ap3s2	-1.29	59772	chr25:10636812-10636821	M05542-NR2F2	-	10	0.622	50.7378	23.178
chr14:34813124-34813498	-1.02	ebf1a	6.59	11163	NA	NA	NA	NA	NA	50.7378	25.3854
chr9:47708956-47709422	-1.02	tns1b	-2.44	28685	chr9:47709214-47709221	M05953-NR2F1	-	8	0.705	50.7378	25.3854
chr9:47708956-47709422	-1.02	tns1b	-2.44	28685	chr9:47709215-47709221	M03840-NR2F1	-	7	0.729	50.7378	25.3854
chr9:47708956-47709422	-1.02	tns1b	-2.44	28685	chr9:47709215-47709222	M01984-NR2F6	-	8	0.871	50.7378	25.3854
chr21:23146986-23147338	-1.20	zbtb16a	4.52	8004	chr21:23147232-23147241	M05542-NR2F2	-	10	0.639	49.8318	22.0743
chr8:15133343-15133766	-1.13	bcar3	2.72	8711	chr8:15133684-15133691	M05953-NR2F1	-	8	0.785	49.8318	23.178
chr8:15133343-15133766	-1.13	bcar3	2.72	8711	chr8:15133685-15133691	M03840-NR2F1	-	7	1.000	49.8318	23.178
chr8:15133343-15133766	-1.13	bcar3	2.72	8711	chr8:15133685-15133692	M01984-NR2F6	-	8	0.916	49.8318	23.178
chr8:15133343-15133766	-1.13	bcar3	2.72	8711	chr8:15133685-15133692	M05541-NR2F2	-	8	0.815	49.8318	23.178
chr8:15133343-15133766	-1.13	bcar3	2.72	8711	chr8:15133685-15133693	M06477-NR2F1	-	9	0.628	49.8318	23.178
chr16:23646357-23646897	-1.13	icn2	3.44	70296	NA	NA	NA	NA	NA	49.8318	23.178
chr9:43340494-43341078	-1.40	ccdc141	3.57	0	chr9:43340540-43340547	M05953-NR2F1	-	8	0.902	48.9258	18.7631
chr9:43340494-43341078	-1.40	ccdc141	3.57	0	chr9:43340541-43340547	M03840-NR2F1	-	7	0.937	48.9258	18.7631
chr9:43340494-43341078	-1.40	ccdc141	3.57	0	chr9:43340541-43340548	M01984-NR2F6	-	8	0.937	48.9258	18.7631
chr9:43340494-43341078	-1.40	ccdc141	3.57	0	chr9:43340541-43340548	M05541-NR2F2	-	8	0.638	48.9258	18.7631
chr9:43340494-43341078	-1.40	ccdc141	3.57	0	chr9:43341027-43341036	M06478-NR2F2	-	10	0.667	48.9258	18.7631
chr9:43340494-43341078	-1.40	ccdc141	3.57	0	chr9:43341028-43341035	M05541-NR2F2	-	8	0.730	48.9258	18.7631
chr9:43340494-43341078	-1.40	ccdc141	3.57	0	chr9:43341028-43341036	M06477-NR2F1	-	9	0.755	48.9258	18.7631
chr9:43340494-43341078	-1.40	ccdc141	3.57	0	chr9:43341028-43341041	M03927-NR2F6	-	14	0.654	48.9258	18.7631
chr9:24255811-24256358	-1.40	lrrfip1a	3.92	190	NA	NA	NA	NA	NA	48.9258	18.7631
chr9:24255811-24256358	-1.40	tyw5	-2.52	49022	NA	NA	NA	NA	NA	48.9258	18.7631
chr13:33300299-33301071	-1.32	macrod2	6.55	50505	chr13:33300401-33300408	M05541-NR2F2	-	8	0.763	48.9258	19.8668
chr13:33300299-33301071	-1.32	macrod2	6.55	50505	chr13:33300401-33300414	M03927-NR2F6	-	14	0.800	48.9258	19.8668
chr13:33300299-33301071	-1.32	iqcc	4.77	128758	chr13:33300401-33300408	M05541-NR2F2	-	8	0.763	48.9258	19.8668
chr13:33300299-33301071	-1.32	iqcc	4.77	128758	chr13:33300401-33300414	M03927-NR2F6	-	14	0.800	48.9258	19.8668
chr14:37379649-37380217	-1.24	pcdh1b	5.76	7248	NA	NA	NA	NA	NA	48.9258	20.9705
chr2:73456-73805	-1.24	LOC100536119	7.06	22584	chr2:73581-73588	M05953-NR2F1	-	8	0.981	48.9258	20.9705
chr2:73456-73805	-1.24	LOC100536119	7.06	22584	chr2:73581-73590	M06478-NR2F2	-	10	0.649	48.9258	20.9705
chr2:73456-73805	-1.24	LOC100536119	7.06	22584	chr2:73582-73588	M03840-NR2F1	-	7	0.937	48.9258	20.9705
chr2:73456-73805	-1.24	LOC100536119	7.06	22584	chr2:73582-73589	M01984-NR2F6	-	8	0.937	48.9258	20.9705
chr2:73456-73805	-1.24	LOC100536119	7.06	22584	chr2:73582-73589	M05541-NR2F2	-	8	0.638	48.9258	20.9705
chr2:73456-73805	-1.24	LOC100536119	7.06	22584	chr2:73586-73600	M03841-NR2F2	-	15	0.666	48.9258	20.9705
chr2:73456-73805	-1.24	LOC100536119	7.06	22584	chr2:73589-73598	M06478-NR2F2	-	10	0.730	48.9258	20.9705
chr2:73456-73805	-1.24	LOC100536119	7.06	22584	chr2:73590-73596	M03840-NR2F1	-	7	0.611	48.9258	20.9705
chr2:73456-73805	-1.24	LOC100536119	7.06	22584	chr2:73590-73597	M05541-NR2F2	-	8	0.616	48.9258	20.9705
chr2:73456-73805	-1.24	LOC100536119	7.06	22584	chr2:73590-73598	M06477-NR2F1	-	9	0.779	48.9258	20.9705
chr2:73456-73805	-1.24	LOC100536119	7.06	22584	chr2:73661-73673	M02591-NR2F1	-	13	0.701	48.9258	20.9705
chr2:73456-73805	-1.24	LOC100536119	7.06	22584	chr2:73661-73673	M05954-NR2F1	-	13	0.701	48.9258	20.9705
chr2:73456-73805	-1.24	LOC100536119	7.06	22584	chr2:73661-73675	M03841-NR2F2	-	15	0.607	48.9258	20.9705
chr2:73456-73805	-1.24	LOC100536119	7.06	22584	chr2:73664-73671	M05953-NR2F1	-	8	0.902	48.9258	20.9705
chr2:73456-73805	-1.24	LOC100536119	7.06	22584	chr2:73664-73673	M06478-NR2F2	-	10	0.885	48.9258	20.9705
chr2:73456-73805	-1.24	LOC100536119	7.06	22584	chr2:73665-73671	M03840-NR2F1	-	7	0.937	48.9258	20.9705
chr2:73456-73805	-1.24	LOC100536119	7.06	22584	chr2:73665-73672	M01984-NR2F6	-	8	0.965	48.9258	20.9705
chr2:73456-73805	-1.24	LOC100536119	7.06	22584	chr2:73665-73672	M05541-NR2F2	-	8	0.860	48.9258	20.9705
chr2:73456-73805	-1.24	LOC100536119	7.06	22584	chr2:73665-73673	M06477-NR2F1	-	9	0.891	48.9258	20.9705
chr2:73456-73805	-1.24	LOC100536119	7.06	22584	chr2:73665-73676	M06476-NR2F1	-	12	0.794	48.9258	20.9705
chr2:73456-73805	-1.24	LOC100536119	7.06	22584	chr2:73707-73713	M03840-NR2F1	-	7	0.609	48.9258	20.9705
chr2:73456-73805	-1.24	znfl2a	2.49	55372	chr2:73581-73588	M05953-NR2F1	-	8	0.981	48.9258	20.9705
chr2:73456-73805	-1.24	znfl2a	2.49	55372	chr2:73581-73590	M06478-NR2F2	-	10	0.649	48.9258	20.9705
chr2:73456-73805	-1.24	znfl2a	2.49	55372	chr2:73582-73588	M03840-NR2F1	-	7	0.937	48.9258	20.9705
chr2:73456-73805	-1.24	znfl2a	2.49	55372	chr2:73582-73589	M01984-NR2F6	-	8	0.937	48.9258	20.9705
chr2:73456-73805	-1.24	znfl2a	2.49	55372	chr2:73582-73589	M05541-NR2F2	-	8	0.638	48.9258	20.9705
chr2:73456-73805	-1.24	znfl2a	2.49	55372	chr2:73586-73600	M03841-NR2F2	-	15	0.666	48.9258	20.9705
chr2:73456-73805	-1.24	znfl2a	2.49	55372	chr2:73589-73598	M06478-NR2F2	-	10	0.730	48.9258	20.9705
chr2:73456-73805	-1.24	znfl2a	2.49	55372	chr2:73590-73596	M03840-NR2F1	-	7	0.611	48.9258	20.9705
chr2:73456-73805	-1.24	znfl2a	2.49	55372	chr2:73590-73597	M05541-NR2F2	-	8	0.616	48.9258	20.9705
chr2:73456-73805	-1.24	znfl2a	2.49	55372	chr2:73590-73598	M06477-NR2F1	-	9	0.779	48.9258	20.9705
chr2:73456-73805	-1.24	znfl2a	2.49	55372	chr2:73661-73673	M02591-NR2F1	-	13	0.701	48.9258	20.9705
chr2:73456-73805	-1.24	znfl2a	2.49	55372	chr2:73661-73673	M05954-NR2F1	-	13	0.701	48.9258	20.9705
chr2:73456-73805	-1.24	znfl2a	2.49	55372	chr2:73661-73675	M03841-NR2F2	-	15	0.607	48.9258	20.9705
chr2:73456-73805	-1.24	znfl2a	2.49	55372	chr2:73664-73671	M05953-NR2F1	-	8	0.902	48.9258	20.9705
chr2:73456-73805	-1.24	znfl2a	2.49	55372	chr2:73664-73673	M06478-NR2F2	-	10	0.885	48.9258	20.9705
chr2:73456-73805	-1.24	znfl2a	2.49	55372	chr2:73665-73671	M03840-NR2F1	-	7	0.937	48.9258	20.9705
chr2:73456-73805	-1.24	znfl2a	2.49	55372	chr2:73665-73672	M01984-NR2F6	-	8	0.965	48.9258	20.9705
chr2:73456-73805	-1.24	znfl2a	2.49	55372	chr2:73665-73672	M05541-NR2F2	-	8	0.860	48.9258	20.9705
chr2:73456-73805	-1.24	znfl2a	2.49	55372	chr2:73665-73673	M06477-NR2F1	-	9	0.891	48.9258	20.9705
chr2:73456-73805	-1.24	znfl2a	2.49	55372	chr2:73665-73676	M06476-NR2F1	-	12	0.794	48.9258	20.9705
chr2:73456-73805	-1.24	znfl2a	2.49	55372	chr2:73707-73713	M03840-NR2F1	-	7	0.609	48.9258	20.9705
chr12:25248940-25249513	-1.17	cox7a3	-1.06	138725	NA	NA	NA	NA	NA	48.9258	22.0743
chr23:29987124-29988116	-1.38	dvl1a	6.51	5149	chr23:29987228-29987235	M05541-NR2F2	-	8	0.730	48.0197	18.7631
chr23:29987124-29988116	-1.38	dvl1a	6.51	5149	chr23:29987228-29987236	M06477-NR2F1	-	9	0.633	48.0197	18.7631
chr23:29987124-29988116	-1.38	dvl1a	6.51	5149	chr23:29987451-29987458	M01984-NR2F6	-	8	0.732	48.0197	18.7631
chr23:29987124-29988116	-1.38	dvl1a	6.51	5149	chr23:29987717-29987723	M03840-NR2F1	-	7	0.672	48.0197	18.7631
chr23:29987124-29988116	-1.38	dvl1a	6.51	5149	chr23:29987906-29987915	M05542-NR2F2	-	10	0.610	48.0197	18.7631
chr23:29987124-29988116	-1.38	dvl1a	6.51	5149	chr23:29987928-29987934	M03840-NR2F1	-	7	0.674	48.0197	18.7631
chr23:29987124-29988116	-1.38	dvl1a	6.51	5149	chr23:29987928-29987935	M05541-NR2F2	-	8	0.756	48.0197	18.7631
chr23:29987124-29988116	-1.38	dvl1a	6.51	5149	chr23:29987928-29987936	M06477-NR2F1	-	9	0.766	48.0197	18.7631
chr23:29987124-29988116	-1.38	dvl1a	6.51	5149	chr23:29988016-29988023	M05953-NR2F1	-	8	0.682	48.0197	18.7631
chr23:29987124-29988116	-1.38	dvl1a	6.51	5149	chr23:29988017-29988023	M03840-NR2F1	-	7	0.668	48.0197	18.7631
chr23:29987124-29988116	-1.38	dvl1a	6.51	5149	chr23:29988017-29988024	M01984-NR2F6	-	8	0.913	48.0197	18.7631
chr23:29987124-29988116	-1.38	dvl1a	6.51	5149	chr23:29988051-29988058	M05953-NR2F1	-	8	0.684	48.0197	18.7631
chr23:29987124-29988116	-1.38	dvl1a	6.51	5149	chr23:29988052-29988058	M03840-NR2F1	-	7	0.729	48.0197	18.7631
chr23:29987124-29988116	-1.38	dvl1a	6.51	5149	chr23:29988052-29988059	M01984-NR2F6	-	8	0.862	48.0197	18.7631
chr23:29987124-29988116	-1.38	tmem201	6.21	55577	chr23:29987228-29987235	M05541-NR2F2	-	8	0.730	48.0197	18.7631
chr23:29987124-29988116	-1.38	tmem201	6.21	55577	chr23:29987228-29987236	M06477-NR2F1	-	9	0.633	48.0197	18.7631
chr23:29987124-29988116	-1.38	tmem201	6.21	55577	chr23:29987451-29987458	M01984-NR2F6	-	8	0.732	48.0197	18.7631
chr23:29987124-29988116	-1.38	tmem201	6.21	55577	chr23:29987717-29987723	M03840-NR2F1	-	7	0.672	48.0197	18.7631
chr23:29987124-29988116	-1.38	tmem201	6.21	55577	chr23:29987906-29987915	M05542-NR2F2	-	10	0.610	48.0197	18.7631
chr23:29987124-29988116	-1.38	tmem201	6.21	55577	chr23:29987928-29987934	M03840-NR2F1	-	7	0.674	48.0197	18.7631
chr23:29987124-29988116	-1.38	tmem201	6.21	55577	chr23:29987928-29987935	M05541-NR2F2	-	8	0.756	48.0197	18.7631
chr23:29987124-29988116	-1.38	tmem201	6.21	55577	chr23:29987928-29987936	M06477-NR2F1	-	9	0.766	48.0197	18.7631
chr23:29987124-29988116	-1.38	tmem201	6.21	55577	chr23:29988016-29988023	M05953-NR2F1	-	8	0.682	48.0197	18.7631
chr23:29987124-29988116	-1.38	tmem201	6.21	55577	chr23:29988017-29988023	M03840-NR2F1	-	7	0.668	48.0197	18.7631
chr23:29987124-29988116	-1.38	tmem201	6.21	55577	chr23:29988017-29988024	M01984-NR2F6	-	8	0.913	48.0197	18.7631
chr23:29987124-29988116	-1.38	tmem201	6.21	55577	chr23:29988051-29988058	M05953-NR2F1	-	8	0.684	48.0197	18.7631
chr23:29987124-29988116	-1.38	tmem201	6.21	55577	chr23:29988052-29988058	M03840-NR2F1	-	7	0.729	48.0197	18.7631
chr23:29987124-29988116	-1.38	tmem201	6.21	55577	chr23:29988052-29988059	M01984-NR2F6	-	8	0.862	48.0197	18.7631
chr20:32275014-32275448	-1.29	cep57l1	3.00	28864	chr20:32275076-32275083	M01984-NR2F6	-	8	0.734	48.0197	19.8668
chr20:32275014-32275448	-1.29	cep57l1	3.00	28864	chr20:32275251-32275266	M03710-NR2F2	-	16	0.687	48.0197	19.8668
chr20:32275014-32275448	-1.29	cd164	5.06	40834	chr20:32275076-32275083	M01984-NR2F6	-	8	0.734	48.0197	19.8668
chr20:32275014-32275448	-1.29	cd164	5.06	40834	chr20:32275251-32275266	M03710-NR2F2	-	16	0.687	48.0197	19.8668
chr8:15134982-15135554	-1.07	bcar3	2.72	8815	chr8:15135078-15135092	M06479-NR2F2	-	15	0.607	48.0197	23.178
chr8:15134982-15135554	-1.07	bcar3	2.72	8815	chr8:15135080-15135089	M05542-NR2F2	-	10	0.695	48.0197	23.178
chr8:15134982-15135554	-1.07	bcar3	2.72	8815	chr8:15135384-15135396	M02591-NR2F1	-	13	0.646	48.0197	23.178
chr8:15134982-15135554	-1.07	bcar3	2.72	8815	chr8:15135384-15135396	M05954-NR2F1	-	13	0.646	48.0197	23.178
chr8:15134982-15135554	-1.07	bcar3	2.72	8815	chr8:15135387-15135394	M05953-NR2F1	-	8	0.894	48.0197	23.178
chr8:15134982-15135554	-1.07	bcar3	2.72	8815	chr8:15135388-15135394	M03840-NR2F1	-	7	0.937	48.0197	23.178
chr8:15134982-15135554	-1.07	bcar3	2.72	8815	chr8:15135388-15135395	M01984-NR2F6	-	8	0.935	48.0197	23.178
chr8:15134982-15135554	-1.07	bcar3	2.72	8815	chr8:15135388-15135395	M05541-NR2F2	-	8	0.624	48.0197	23.178
chr1:7881938-7882766	-1.01	ptcd1	2.36	0	chr1:7881950-7881957	M01984-NR2F6	-	8	0.788	48.0197	24.2817
chr1:7881938-7882766	-1.01	ptcd1	2.36	0	chr1:7881962-7881976	M03841-NR2F2	-	15	0.655	48.0197	24.2817
chr1:7881938-7882766	-1.01	ptcd1	2.36	0	chr1:7881965-7881974	M06478-NR2F2	-	10	0.719	48.0197	24.2817
chr1:7881938-7882766	-1.01	ptcd1	2.36	0	chr1:7881966-7881972	M03840-NR2F1	-	7	0.674	48.0197	24.2817
chr1:7881938-7882766	-1.01	ptcd1	2.36	0	chr1:7881966-7881973	M05541-NR2F2	-	8	0.756	48.0197	24.2817
chr1:7881938-7882766	-1.01	ptcd1	2.36	0	chr1:7881966-7881974	M06477-NR2F1	-	9	0.706	48.0197	24.2817
chr5:44321634-44322292	-1.01	dmrt1	5.19	22333	chr5:44321778-44321791	M03927-NR2F6	-	14	0.615	48.0197	24.2817
chr5:44321634-44322292	-1.01	dmrt1	5.19	22333	chr5:44321784-44321791	M05953-NR2F1	-	8	0.825	48.0197	24.2817
chr5:44321634-44322292	-1.01	dmrt1	5.19	22333	chr5:44321785-44321791	M03840-NR2F1	-	7	0.870	48.0197	24.2817
chr5:44321634-44322292	-1.01	dmrt1	5.19	22333	chr5:44321785-44321792	M01984-NR2F6	-	8	0.951	48.0197	24.2817
chr2:45848532-45848920	-1.01	prpf38b	2.50	37607	NA	NA	NA	NA	NA	48.0197	24.2817
chr2:45848532-45848920	-1.01	fndc7rs1	-7.47	47105	NA	NA	NA	NA	NA	48.0197	24.2817
chr1:7881938-7882766	-1.01	alkbh5	-4.11	49459	chr1:7881950-7881957	M01984-NR2F6	-	8	0.788	48.0197	24.2817
chr1:7881938-7882766	-1.01	alkbh5	-4.11	49459	chr1:7881962-7881976	M03841-NR2F2	-	15	0.655	48.0197	24.2817
chr1:7881938-7882766	-1.01	alkbh5	-4.11	49459	chr1:7881965-7881974	M06478-NR2F2	-	10	0.719	48.0197	24.2817
chr1:7881938-7882766	-1.01	alkbh5	-4.11	49459	chr1:7881966-7881972	M03840-NR2F1	-	7	0.674	48.0197	24.2817
chr1:7881938-7882766	-1.01	alkbh5	-4.11	49459	chr1:7881966-7881973	M05541-NR2F2	-	8	0.756	48.0197	24.2817
chr1:7881938-7882766	-1.01	alkbh5	-4.11	49459	chr1:7881966-7881974	M06477-NR2F1	-	9	0.706	48.0197	24.2817
chr7:50600865-50601366	-1.12	ankrd46b	3.19	34523	chr7:50600939-50600948	M05542-NR2F2	-	10	0.702	47.1137	22.0743
chr2:15460125-15460555	-1.05	arhgap29b	-4.60	198	NA	NA	NA	NA	NA	47.1137	23.178
chr17:45430066-45430526	-1.05	tagapa	6.31	2666	chr17:45430217-45430226	M05542-NR2F2	-	10	0.678	47.1137	23.178
chr17:45430066-45430526	-1.05	tagapa	6.31	2666	chr17:45430282-45430289	M01984-NR2F6	-	8	0.753	47.1137	23.178
chr2:15460125-15460555	-1.05	f3b	2.43	21748	NA	NA	NA	NA	NA	47.1137	23.178
chr2:15460125-15460555	-1.05	cnn3b	-1.59	53421	NA	NA	NA	NA	NA	47.1137	23.178
chr17:45430066-45430526	-1.05	capn3a	-7.38	66670	chr17:45430217-45430226	M05542-NR2F2	-	10	0.678	47.1137	23.178
chr17:45430066-45430526	-1.05	capn3a	-7.38	66670	chr17:45430282-45430289	M01984-NR2F6	-	8	0.753	47.1137	23.178
chr2:55875320-55875668	-1.71	nmrk2	-1.28	8505	NA	NA	NA	NA	NA	46.2077	14.3483
chr8:17094107-17094825	-1.60	mier3b	2.81	12877	chr8:17094653-17094660	M05541-NR2F2	-	8	0.688	46.2077	15.452
chr8:17094107-17094825	-1.60	mrps36	-1.12	32957	chr8:17094653-17094660	M05541-NR2F2	-	8	0.688	46.2077	15.452
chr8:17094107-17094825	-1.60	plk2b	3.60	43625	chr8:17094653-17094660	M05541-NR2F2	-	8	0.688	46.2077	15.452
chr8:17094107-17094825	-1.60	pola2	3.33	44258	chr8:17094653-17094660	M05541-NR2F2	-	8	0.688	46.2077	15.452
chr9:6469090-6469463	-1.16	nck2a	2.52	31492	chr9:6469181-6469193	M02591-NR2F1	-	13	0.655	46.2077	20.9705
chr9:6469090-6469463	-1.16	nck2a	2.52	31492	chr9:6469181-6469193	M05954-NR2F1	-	13	0.655	46.2077	20.9705
chr9:6469090-6469463	-1.16	nck2a	2.52	31492	chr9:6469184-6469191	M05953-NR2F1	-	8	0.798	46.2077	20.9705
chr9:6469090-6469463	-1.16	nck2a	2.52	31492	chr9:6469185-6469191	M03840-NR2F1	-	7	1.000	46.2077	20.9705
chr9:6469090-6469463	-1.16	nck2a	2.52	31492	chr9:6469185-6469192	M01984-NR2F6	-	8	0.916	46.2077	20.9705
chr9:6469090-6469463	-1.16	nck2a	2.52	31492	chr9:6469185-6469192	M05541-NR2F2	-	8	0.815	46.2077	20.9705
chr9:6469090-6469463	-1.16	nck2a	2.52	31492	chr9:6469185-6469193	M06477-NR2F1	-	9	0.628	46.2077	20.9705
chr9:6469090-6469463	-1.16	uxs1	1.64	76383	chr9:6469181-6469193	M02591-NR2F1	-	13	0.655	46.2077	20.9705
chr9:6469090-6469463	-1.16	uxs1	1.64	76383	chr9:6469181-6469193	M05954-NR2F1	-	13	0.655	46.2077	20.9705
chr9:6469090-6469463	-1.16	uxs1	1.64	76383	chr9:6469184-6469191	M05953-NR2F1	-	8	0.798	46.2077	20.9705
chr9:6469090-6469463	-1.16	uxs1	1.64	76383	chr9:6469185-6469191	M03840-NR2F1	-	7	1.000	46.2077	20.9705
chr9:6469090-6469463	-1.16	uxs1	1.64	76383	chr9:6469185-6469192	M01984-NR2F6	-	8	0.916	46.2077	20.9705
chr9:6469090-6469463	-1.16	uxs1	1.64	76383	chr9:6469185-6469192	M05541-NR2F2	-	8	0.815	46.2077	20.9705
chr9:6469090-6469463	-1.16	uxs1	1.64	76383	chr9:6469185-6469193	M06477-NR2F1	-	9	0.628	46.2077	20.9705
chr2:18161823-18162368	-1.09	ptprfb	2.43	4714	NA	NA	NA	NA	NA	46.2077	22.0743
chr25:28250000-28250510	-1.29	cnot2	-1.40	0	chr25:28250106-28250112	M03840-NR2F1	-	7	0.611	45.3016	18.7631
chr25:28250000-28250510	-1.29	cnot2	-1.40	0	chr25:28250481-28250490	M05542-NR2F2	-	10	0.650	45.3016	18.7631
chr9:29163682-29164250	-1.13	ptpn4a	-6.70	63	chr9:29163713-29163720	M05953-NR2F1	-	8	0.705	45.3016	20.9705
chr9:29163682-29164250	-1.13	ptpn4a	-6.70	63	chr9:29163714-29163720	M03840-NR2F1	-	7	0.729	45.3016	20.9705
chr9:29163682-29164250	-1.13	ptpn4a	-6.70	63	chr9:29163714-29163721	M01984-NR2F6	-	8	0.871	45.3016	20.9705
chr9:29163682-29164250	-1.13	ptpn4a	-6.70	63	chr9:29164059-29164073	M06479-NR2F2	-	15	0.608	45.3016	20.9705
chr10:1213405-1213919	-1.06	pdlim5b	-1.18	0	chr10:1213446-1213454	M06477-NR2F1	-	9	0.639	45.3016	22.0743
chr9:43178509-43179117	-1.06	ttna	-1.16	0	chr9:43178565-43178574	M05542-NR2F2	-	10	0.789	45.3016	22.0743
chr16:35921945-35922576	-1.89	thrap3a	-1.31	4030	chr16:35922489-35922496	M01984-NR2F6	-	8	0.732	44.3956	12.1408
chr9:33107570-33108010	-1.26	nhlh2	3.64	26337	chr9:33107602-33107609	M05541-NR2F2	-	8	0.633	44.3956	18.7631
chr24:31423996-31424388	-1.18	cpne3	3.52	12780	NA	NA	NA	NA	NA	44.3956	19.8668
chr9:22042786-22043141	-1.18	txndc9	-1.10	29009	chr9:22042805-22042812	M05953-NR2F1	-	8	0.765	44.3956	19.8668
chr9:22042786-22043141	-1.18	txndc9	-1.10	29009	chr9:22042806-22042812	M03840-NR2F1	-	7	0.859	44.3956	19.8668
chr9:22042786-22043141	-1.18	txndc9	-1.10	29009	chr9:22042806-22042813	M01984-NR2F6	-	8	0.806	44.3956	19.8668
chr9:22042786-22043141	-1.18	txndc9	-1.10	29009	chr9:22042889-22042896	M05541-NR2F2	-	8	0.688	44.3956	19.8668
chr9:22042786-22043141	-1.18	rev1	5.57	36015	chr9:22042805-22042812	M05953-NR2F1	-	8	0.765	44.3956	19.8668
chr9:22042786-22043141	-1.18	rev1	5.57	36015	chr9:22042806-22042812	M03840-NR2F1	-	7	0.859	44.3956	19.8668
chr9:22042786-22043141	-1.18	rev1	5.57	36015	chr9:22042806-22042813	M01984-NR2F6	-	8	0.806	44.3956	19.8668
chr9:22042786-22043141	-1.18	rev1	5.57	36015	chr9:22042889-22042896	M05541-NR2F2	-	8	0.688	44.3956	19.8668
chr7:20186212-20186896	-1.10	ntn5	5.90	0	chr7:20186623-20186630	M05541-NR2F2	-	8	0.653	44.3956	20.9705
chr7:20186212-20186896	-1.10	ntn5	5.90	0	chr7:20186740-20186747	M01984-NR2F6	-	8	0.732	44.3956	20.9705
chr18:49940931-49941251	-1.10	dusp8b	-5.11	4492	chr18:49941090-49941099	M05542-NR2F2	-	10	0.608	44.3956	20.9705
chr7:20186212-20186896	-1.10	cnpy4	5.02	20807	chr7:20186623-20186630	M05541-NR2F2	-	8	0.653	44.3956	20.9705
chr7:20186212-20186896	-1.10	cnpy4	5.02	20807	chr7:20186740-20186747	M01984-NR2F6	-	8	0.732	44.3956	20.9705
chr16:21089785-21090223	-1.86	hoxa10b	-1.99	13512	chr16:21089845-21089851	M03840-NR2F1	-	7	0.609	43.4896	12.1408
chr16:21089785-21090223	-1.86	hoxa10b	-1.99	13512	chr16:21090167-21090174	M05953-NR2F1	-	8	0.769	43.4896	12.1408
chr16:21089785-21090223	-1.86	hoxa10b	-1.99	13512	chr16:21090168-21090174	M03840-NR2F1	-	7	0.668	43.4896	12.1408
chr16:21089785-21090223	-1.86	hoxa10b	-1.99	13512	chr16:21090168-21090175	M01984-NR2F6	-	8	0.904	43.4896	12.1408
chr5:32369952-32370423	-1.32	lmo4a	-2.76	23851	NA	NA	NA	NA	NA	43.4896	17.6594
chr12:22652867-22653479	-1.23	ablim2	-1.20	0	chr12:22653440-22653449	M05542-NR2F2	-	10	0.608	43.4896	18.7631
chr11:37708246-37708961	-1.23	slc41a1	-7.47	7717	chr11:37708699-37708706	M05953-NR2F1	-	8	0.669	43.4896	18.7631
chr11:37708246-37708961	-1.23	slc41a1	-7.47	7717	chr11:37708700-37708706	M03840-NR2F1	-	7	0.668	43.4896	18.7631
chr11:37708246-37708961	-1.23	slc41a1	-7.47	7717	chr11:37708700-37708707	M01984-NR2F6	-	8	0.886	43.4896	18.7631
chr12:22652867-22653479	-1.23	zcchc4	4.42	103808	chr12:22653440-22653449	M05542-NR2F2	-	10	0.608	43.4896	18.7631
chr12:5495146-5495692	-1.15	ace	5.68	0	chr12:5495207-5495214	M05541-NR2F2	-	8	0.623	43.4896	19.8668
chr7:52142494-52142891	-1.00	polr2m	4.42	0	chr7:52142653-52142667	M06479-NR2F2	-	15	0.636	43.4896	22.0743
chr20:37687494-37687903	-1.00	hivep2a	-1.57	2486	chr20:37687537-37687543	M03840-NR2F1	-	7	0.609	43.4896	22.0743
chr24:3482046-3482615	-1.00	wdr37	-2.20	4296	NA	NA	NA	NA	NA	43.4896	22.0743
chr13:33832992-33833380	-1.00	macrod2	6.55	9022	chr13:33833204-33833213	M05542-NR2F2	-	10	0.632	43.4896	22.0743
chr10:9167566-9168117	-1.00	LOC103911725	-1.45	44074	NA	NA	NA	NA	NA	43.4896	22.0743
chr10:9167566-9168117	-1.00	mocs2	-1.45	44102	NA	NA	NA	NA	NA	43.4896	22.0743
chr24:3482046-3482615	-1.00	nck1b	-1.09	106307	NA	NA	NA	NA	NA	43.4896	22.0743
chr7:52142494-52142891	-1.00	katnb1	2.74	132219	chr7:52142653-52142667	M06479-NR2F2	-	15	0.636	43.4896	22.0743
chr24:3482046-3482615	-1.00	bdh1	-4.96	177440	NA	NA	NA	NA	NA	43.4896	22.0743
chr9:34866068-34866636	-1.59	shox	5.21	25033	chr9:34866560-34866567	M05953-NR2F1	-	8	0.902	42.5835	14.3483
chr9:34866068-34866636	-1.59	shox	5.21	25033	chr9:34866560-34866569	M06478-NR2F2	-	10	0.765	42.5835	14.3483
chr9:34866068-34866636	-1.59	shox	5.21	25033	chr9:34866561-34866567	M03840-NR2F1	-	7	0.937	42.5835	14.3483
chr9:34866068-34866636	-1.59	shox	5.21	25033	chr9:34866561-34866568	M01984-NR2F6	-	8	0.935	42.5835	14.3483
chr9:34866068-34866636	-1.59	shox	5.21	25033	chr9:34866561-34866568	M05541-NR2F2	-	8	0.624	42.5835	14.3483
chr9:34866068-34866636	-1.59	shox	5.21	25033	chr9:34866561-34866569	M06477-NR2F1	-	9	0.713	42.5835	14.3483
chr2:36627468-36627855	-1.29	ing5b	2.52	1166	chr2:36627704-36627711	M05953-NR2F1	-	8	0.665	42.5835	17.6594
chr2:36627468-36627855	-1.29	ing5b	2.52	1166	chr2:36627705-36627711	M03840-NR2F1	-	7	0.859	42.5835	17.6594
chr2:36627468-36627855	-1.29	ing5b	2.52	1166	chr2:36627705-36627712	M01984-NR2F6	-	8	0.836	42.5835	17.6594
chr2:36627468-36627855	-1.29	ing5b	2.52	1166	chr2:36627705-36627712	M05541-NR2F2	-	8	0.655	42.5835	17.6594
chr2:36627468-36627855	-1.29	ing5b	2.52	1166	chr2:36627705-36627713	M06477-NR2F1	-	9	0.675	42.5835	17.6594
chr13:10066320-10066765	-1.29	six2a	-1.98	33455	chr13:10066323-10066330	M05541-NR2F2	-	8	0.688	42.5835	17.6594
chr2:35581696-35582655	-1.20	mrps14	-1.10	26330	chr2:35582093-35582100	M05541-NR2F2	-	8	0.604	42.5835	18.7631
chr24:17249626-17250235	-1.12	cul1b	5.01	4583	chr24:17249688-17249697	M05542-NR2F2	-	10	0.718	42.5835	19.8668
chr24:17249626-17250235	-1.12	cul1b	5.01	4583	chr24:17250110-17250117	M05953-NR2F1	-	8	0.686	42.5835	19.8668
chr24:17249626-17250235	-1.12	cul1b	5.01	4583	chr24:17250111-17250117	M03840-NR2F1	-	7	0.859	42.5835	19.8668
chr24:17249626-17250235	-1.12	cul1b	5.01	4583	chr24:17250111-17250118	M01984-NR2F6	-	8	0.827	42.5835	19.8668
chr1:4712479-4713131	-1.04	tuba8l2	-1.05	3344	chr1:4712776-4712785	M05542-NR2F2	-	10	0.605	42.5835	20.9705
chr1:4712479-4713131	-1.04	tuba8l2	-1.05	3344	chr1:4713071-4713078	M01984-NR2F6	-	8	0.732	42.5835	20.9705
chr15:6041134-6043257	1.02	igsf5b	-3.44	1794	NA	NA	NA	NA	NA	41.6775	86.0896
chr17:25340094-25340637	-1.35	aim1a	-4.18	122496	chr17:25340186-25340193	M01984-NR2F6	-	8	0.840	41.6775	16.5557
chr17:25340094-25340637	-1.35	aim1a	-4.18	122496	chr17:25340583-25340590	M05541-NR2F2	-	8	0.633	41.6775	16.5557
chr16:10404042-10404378	-1.26	mrs2	3.31	10069	chr16:10404158-10404172	M09889-NR2F6	-	15	0.615	41.6775	17.6594
chr16:10404042-10404378	-1.26	mrs2	3.31	10069	chr16:10404159-10404166	M01984-NR2F6	-	8	0.835	41.6775	17.6594
chr17:10455689-10456319	-1.17	mapkbp1	3.82	5630	chr17:10456243-10456250	M05541-NR2F2	-	8	0.702	41.6775	18.7631
chr22:29898791-29899271	-1.17	smc3	3.29	10468	chr22:29898820-29898826	M03840-NR2F1	-	7	0.636	41.6775	18.7631
chr22:29898791-29899271	-1.17	smc3	3.29	10468	chr22:29898820-29898827	M05541-NR2F2	-	8	0.793	41.6775	18.7631
chr22:29898791-29899271	-1.17	smc3	3.29	10468	chr22:29899058-29899065	M05953-NR2F1	-	8	0.894	41.6775	18.7631
chr22:29898791-29899271	-1.17	smc3	3.29	10468	chr22:29899059-29899065	M03840-NR2F1	-	7	0.937	41.6775	18.7631
chr22:29898791-29899271	-1.17	smc3	3.29	10468	chr22:29899059-29899066	M01984-NR2F6	-	8	0.935	41.6775	18.7631
chr22:29898791-29899271	-1.17	smc3	3.29	10468	chr22:29899059-29899066	M05541-NR2F2	-	8	0.624	41.6775	18.7631
chr22:29898791-29899271	-1.17	rbm20	-1.21	11977	chr22:29898820-29898826	M03840-NR2F1	-	7	0.636	41.6775	18.7631
chr22:29898791-29899271	-1.17	rbm20	-1.21	11977	chr22:29898820-29898827	M05541-NR2F2	-	8	0.793	41.6775	18.7631
chr22:29898791-29899271	-1.17	rbm20	-1.21	11977	chr22:29899058-29899065	M05953-NR2F1	-	8	0.894	41.6775	18.7631
chr22:29898791-29899271	-1.17	rbm20	-1.21	11977	chr22:29899059-29899065	M03840-NR2F1	-	7	0.937	41.6775	18.7631
chr22:29898791-29899271	-1.17	rbm20	-1.21	11977	chr22:29899059-29899066	M01984-NR2F6	-	8	0.935	41.6775	18.7631
chr22:29898791-29899271	-1.17	rbm20	-1.21	11977	chr22:29899059-29899066	M05541-NR2F2	-	8	0.624	41.6775	18.7631
chr20:28797822-28798330	-1.17	rgs6	1.48	61838	chr20:28797875-28797882	M05953-NR2F1	-	8	0.902	41.6775	18.7631
chr20:28797822-28798330	-1.17	rgs6	1.48	61838	chr20:28797876-28797882	M03840-NR2F1	-	7	0.937	41.6775	18.7631
chr20:28797822-28798330	-1.17	rgs6	1.48	61838	chr20:28797876-28797883	M01984-NR2F6	-	8	0.937	41.6775	18.7631
chr20:28797822-28798330	-1.17	rgs6	1.48	61838	chr20:28797876-28797883	M05541-NR2F2	-	8	0.638	41.6775	18.7631
chr20:28797822-28798330	-1.17	rgs6	1.48	61838	chr20:28798294-28798301	M05953-NR2F1	-	8	0.785	41.6775	18.7631
chr20:28797822-28798330	-1.17	rgs6	1.48	61838	chr20:28798294-28798303	M06478-NR2F2	-	10	0.611	41.6775	18.7631
chr20:28797822-28798330	-1.17	rgs6	1.48	61838	chr20:28798295-28798301	M03840-NR2F1	-	7	1.000	41.6775	18.7631
chr20:28797822-28798330	-1.17	rgs6	1.48	61838	chr20:28798295-28798302	M01984-NR2F6	-	8	0.895	41.6775	18.7631
chr20:28797822-28798330	-1.17	rgs6	1.48	61838	chr20:28798295-28798302	M05541-NR2F2	-	8	0.764	41.6775	18.7631
chr20:28797822-28798330	-1.17	rgs6	1.48	61838	chr20:28798295-28798303	M06477-NR2F1	-	9	0.640	41.6775	18.7631
chr24:20512446-20513070	-1.09	nktr	-1.23	72	NA	NA	NA	NA	NA	41.6775	19.8668
chr18:6607277-6607696	-1.09	LOC799520	6.83	218128	chr18:6607309-6607323	M03841-NR2F2	-	15	0.673	41.6775	19.8668
chr18:6607277-6607696	-1.09	LOC799520	6.83	218128	chr18:6607312-6607319	M05953-NR2F1	-	8	0.798	41.6775	19.8668
chr18:6607277-6607696	-1.09	LOC799520	6.83	218128	chr18:6607313-6607319	M03840-NR2F1	-	7	1.000	41.6775	19.8668
chr18:6607277-6607696	-1.09	LOC799520	6.83	218128	chr18:6607313-6607320	M01984-NR2F6	-	8	0.916	41.6775	19.8668
chr18:6607277-6607696	-1.09	LOC799520	6.83	218128	chr18:6607313-6607320	M05541-NR2F2	-	8	0.815	41.6775	19.8668
chr18:6607277-6607696	-1.09	LOC799520	6.83	218128	chr18:6607313-6607321	M06477-NR2F1	-	9	0.699	41.6775	19.8668
chr18:6607277-6607696	-1.09	LOC799520	6.83	218128	chr18:6607319-6607326	M05541-NR2F2	-	8	0.688	41.6775	19.8668
chr19:34118166-34118481	-1.01	runx1t1	-5.11	3310	NA	NA	NA	NA	NA	41.6775	20.9705
chr6:41491274-41491793	-1.42	twf2	-6.84	2399	NA	NA	NA	NA	NA	40.7715	15.452
chr6:41491274-41491793	-1.42	LOC108190422	-8.02	10727	NA	NA	NA	NA	NA	40.7715	15.452
chr6:41491274-41491793	-1.42	cish	4.46	14466	NA	NA	NA	NA	NA	40.7715	15.452
chr6:41491274-41491793	-1.42	rsg1	5.59	36824	NA	NA	NA	NA	NA	40.7715	15.452
chr6:41491274-41491793	-1.42	cadpsb	6.46	43246	NA	NA	NA	NA	NA	40.7715	15.452
chr6:18857224-18857650	-1.32	stk11ip	4.40	36523	chr6:18857333-18857346	M03927-NR2F6	-	14	0.605	40.7715	16.5557
chr6:18857224-18857650	-1.32	stk11ip	4.40	36523	chr6:18857598-18857605	M05541-NR2F2	-	8	0.688	40.7715	16.5557
chr13:22126529-22127107	-1.14	usp54a	5.51	23466	NA	NA	NA	NA	NA	40.7715	18.7631
chr7:49014880-49015248	-1.14	brsk2b	4.35	36072	chr7:49014941-49014948	M05541-NR2F2	-	8	0.653	40.7715	18.7631
chr18:8388717-8389041	-1.14	prpf18	2.67	55083	NA	NA	NA	NA	NA	40.7715	18.7631
chr15:21340672-21341134	-1.06	ubash3bb	5.83	0	NA	NA	NA	NA	NA	40.7715	19.8668
chr9:14456972-14457493	-1.06	nrp2b	5.76	5145	chr9:14457384-14457391	M05953-NR2F1	-	8	0.798	40.7715	19.8668
chr9:14456972-14457493	-1.06	nrp2b	5.76	5145	chr9:14457385-14457391	M03840-NR2F1	-	7	1.000	40.7715	19.8668
chr9:14456972-14457493	-1.06	nrp2b	5.76	5145	chr9:14457385-14457392	M01984-NR2F6	-	8	0.916	40.7715	19.8668
chr9:14456972-14457493	-1.06	nrp2b	5.76	5145	chr9:14457385-14457392	M05541-NR2F2	-	8	0.815	40.7715	19.8668
chr9:14456972-14457493	-1.06	nrp2b	5.76	5145	chr9:14457385-14457393	M06477-NR2F1	-	9	0.628	40.7715	19.8668
chr9:14456972-14457493	-1.06	nrp2b	5.76	5145	chr9:14457408-14457420	M02591-NR2F1	-	13	0.661	40.7715	19.8668
chr9:14456972-14457493	-1.06	nrp2b	5.76	5145	chr9:14457408-14457420	M05954-NR2F1	-	13	0.661	40.7715	19.8668
chr9:14456972-14457493	-1.06	nrp2b	5.76	5145	chr9:14457411-14457418	M05953-NR2F1	-	8	0.885	40.7715	19.8668
chr9:14456972-14457493	-1.06	nrp2b	5.76	5145	chr9:14457411-14457420	M06478-NR2F2	-	10	0.880	40.7715	19.8668
chr9:14456972-14457493	-1.06	nrp2b	5.76	5145	chr9:14457412-14457418	M03840-NR2F1	-	7	1.000	40.7715	19.8668
chr9:14456972-14457493	-1.06	nrp2b	5.76	5145	chr9:14457412-14457419	M01984-NR2F6	-	8	0.895	40.7715	19.8668
chr9:14456972-14457493	-1.06	nrp2b	5.76	5145	chr9:14457412-14457419	M05541-NR2F2	-	8	0.764	40.7715	19.8668
chr9:14456972-14457493	-1.06	nrp2b	5.76	5145	chr9:14457412-14457420	M06477-NR2F1	-	9	0.822	40.7715	19.8668
chr9:14456972-14457493	-1.06	nrp2b	5.76	5145	chr9:14457412-14457423	M06476-NR2F1	-	12	0.625	40.7715	19.8668
chr9:14456972-14457493	-1.06	nrp2b	5.76	5145	chr9:14457479-14457491	M02591-NR2F1	-	13	0.779	40.7715	19.8668
chr9:14456972-14457493	-1.06	nrp2b	5.76	5145	chr9:14457479-14457491	M05954-NR2F1	-	13	0.779	40.7715	19.8668
chr9:14456972-14457493	-1.06	nrp2b	5.76	5145	chr9:14457482-14457489	M05953-NR2F1	-	8	0.902	40.7715	19.8668
chr9:14456972-14457493	-1.06	nrp2b	5.76	5145	chr9:14457482-14457491	M06478-NR2F2	-	10	0.759	40.7715	19.8668
chr9:14456972-14457493	-1.06	nrp2b	5.76	5145	chr9:14457483-14457489	M03840-NR2F1	-	7	0.937	40.7715	19.8668
chr9:14456972-14457493	-1.06	nrp2b	5.76	5145	chr9:14457483-14457490	M01984-NR2F6	-	8	0.965	40.7715	19.8668
chr9:14456972-14457493	-1.06	nrp2b	5.76	5145	chr9:14457483-14457490	M05541-NR2F2	-	8	0.860	40.7715	19.8668
chr9:14456972-14457493	-1.06	nrp2b	5.76	5145	chr9:14457483-14457491	M06477-NR2F1	-	9	0.709	40.7715	19.8668
chr15:21340672-21341134	-1.06	usf1	3.87	15213	NA	NA	NA	NA	NA	40.7715	19.8668
chr18:31245769-31246152	-1.06	tcf25	2.08	17266	NA	NA	NA	NA	NA	40.7715	19.8668
chr25:16260173-16260618	-1.06	mical2b	-2.09	47683	chr25:16260349-16260356	M05953-NR2F1	-	8	0.902	40.7715	19.8668
chr25:16260173-16260618	-1.06	mical2b	-2.09	47683	chr25:16260349-16260358	M06478-NR2F2	-	10	0.765	40.7715	19.8668
chr25:16260173-16260618	-1.06	mical2b	-2.09	47683	chr25:16260350-16260356	M03840-NR2F1	-	7	0.937	40.7715	19.8668
chr25:16260173-16260618	-1.06	mical2b	-2.09	47683	chr25:16260350-16260357	M01984-NR2F6	-	8	0.935	40.7715	19.8668
chr25:16260173-16260618	-1.06	mical2b	-2.09	47683	chr25:16260350-16260357	M05541-NR2F2	-	8	0.624	40.7715	19.8668
chr25:16260173-16260618	-1.06	mical2b	-2.09	47683	chr25:16260350-16260358	M06477-NR2F1	-	9	0.713	40.7715	19.8668
chr25:16260173-16260618	-1.06	rassf10a	5.51	82276	chr25:16260349-16260356	M05953-NR2F1	-	8	0.902	40.7715	19.8668
chr25:16260173-16260618	-1.06	rassf10a	5.51	82276	chr25:16260349-16260358	M06478-NR2F2	-	10	0.765	40.7715	19.8668
chr25:16260173-16260618	-1.06	rassf10a	5.51	82276	chr25:16260350-16260356	M03840-NR2F1	-	7	0.937	40.7715	19.8668
chr25:16260173-16260618	-1.06	rassf10a	5.51	82276	chr25:16260350-16260357	M01984-NR2F6	-	8	0.935	40.7715	19.8668
chr25:16260173-16260618	-1.06	rassf10a	5.51	82276	chr25:16260350-16260357	M05541-NR2F2	-	8	0.624	40.7715	19.8668
chr25:16260173-16260618	-1.06	rassf10a	5.51	82276	chr25:16260350-16260358	M06477-NR2F1	-	9	0.713	40.7715	19.8668
chr25:16260173-16260618	-1.06	cecr2	6.41	289143	chr25:16260349-16260356	M05953-NR2F1	-	8	0.902	40.7715	19.8668
chr25:16260173-16260618	-1.06	cecr2	6.41	289143	chr25:16260349-16260358	M06478-NR2F2	-	10	0.765	40.7715	19.8668
chr25:16260173-16260618	-1.06	cecr2	6.41	289143	chr25:16260350-16260356	M03840-NR2F1	-	7	0.937	40.7715	19.8668
chr25:16260173-16260618	-1.06	cecr2	6.41	289143	chr25:16260350-16260357	M01984-NR2F6	-	8	0.935	40.7715	19.8668
chr25:16260173-16260618	-1.06	cecr2	6.41	289143	chr25:16260350-16260357	M05541-NR2F2	-	8	0.624	40.7715	19.8668
chr25:16260173-16260618	-1.06	cecr2	6.41	289143	chr25:16260350-16260358	M06477-NR2F1	-	9	0.713	40.7715	19.8668
chr1:55132948-55133325	-1.61	ndufb7	-1.28	24868	chr1:55132965-55132974	M05542-NR2F2	-	10	0.702	39.8654	13.2446
chr1:55132948-55133325	-1.61	ndufb7	-1.28	24868	chr1:55133202-55133215	M03927-NR2F6	-	14	0.604	39.8654	13.2446
chr1:55132948-55133325	-1.61	ndufb7	-1.28	24868	chr1:55133221-55133233	M02591-NR2F1	-	13	0.849	39.8654	13.2446
chr1:55132948-55133325	-1.61	ndufb7	-1.28	24868	chr1:55133221-55133233	M05954-NR2F1	-	13	0.849	39.8654	13.2446
chr1:55132948-55133325	-1.61	ndufb7	-1.28	24868	chr1:55133224-55133231	M05953-NR2F1	-	8	0.981	39.8654	13.2446
chr1:55132948-55133325	-1.61	ndufb7	-1.28	24868	chr1:55133224-55133233	M06478-NR2F2	-	10	0.806	39.8654	13.2446
chr1:55132948-55133325	-1.61	ndufb7	-1.28	24868	chr1:55133225-55133231	M03840-NR2F1	-	7	0.937	39.8654	13.2446
chr1:55132948-55133325	-1.61	ndufb7	-1.28	24868	chr1:55133225-55133232	M01984-NR2F6	-	8	0.965	39.8654	13.2446
chr1:55132948-55133325	-1.61	ndufb7	-1.28	24868	chr1:55133225-55133232	M05541-NR2F2	-	8	0.860	39.8654	13.2446
chr1:55132948-55133325	-1.61	ndufb7	-1.28	24868	chr1:55133225-55133233	M06477-NR2F1	-	9	0.709	39.8654	13.2446
chr1:55132948-55133325	-1.61	tecrb	-1.00	33446	chr1:55132965-55132974	M05542-NR2F2	-	10	0.702	39.8654	13.2446
chr1:55132948-55133325	-1.61	tecrb	-1.00	33446	chr1:55133202-55133215	M03927-NR2F6	-	14	0.604	39.8654	13.2446
chr1:55132948-55133325	-1.61	tecrb	-1.00	33446	chr1:55133221-55133233	M02591-NR2F1	-	13	0.849	39.8654	13.2446
chr1:55132948-55133325	-1.61	tecrb	-1.00	33446	chr1:55133221-55133233	M05954-NR2F1	-	13	0.849	39.8654	13.2446
chr1:55132948-55133325	-1.61	tecrb	-1.00	33446	chr1:55133224-55133231	M05953-NR2F1	-	8	0.981	39.8654	13.2446
chr1:55132948-55133325	-1.61	tecrb	-1.00	33446	chr1:55133224-55133233	M06478-NR2F2	-	10	0.806	39.8654	13.2446
chr1:55132948-55133325	-1.61	tecrb	-1.00	33446	chr1:55133225-55133231	M03840-NR2F1	-	7	0.937	39.8654	13.2446
chr1:55132948-55133325	-1.61	tecrb	-1.00	33446	chr1:55133225-55133232	M01984-NR2F6	-	8	0.965	39.8654	13.2446
chr1:55132948-55133325	-1.61	tecrb	-1.00	33446	chr1:55133225-55133232	M05541-NR2F2	-	8	0.860	39.8654	13.2446
chr1:55132948-55133325	-1.61	tecrb	-1.00	33446	chr1:55133225-55133233	M06477-NR2F1	-	9	0.709	39.8654	13.2446
chr1:31113711-31114400	-1.50	nt5c2b	-6.22	0	chr1:31114003-31114010	M05953-NR2F1	-	8	0.686	39.8654	14.3483
chr1:31113711-31114400	-1.50	nt5c2b	-6.22	0	chr1:31114004-31114010	M03840-NR2F1	-	7	0.859	39.8654	14.3483
chr1:31113711-31114400	-1.50	nt5c2b	-6.22	0	chr1:31114004-31114011	M01984-NR2F6	-	8	0.808	39.8654	14.3483
chr22:3672670-3673005	-1.39	ptprsa	6.37	5212	chr22:3672868-3672874	M03840-NR2F1	-	7	0.672	39.8654	15.452
chr22:3672670-3673005	-1.39	ptprsa	6.37	5212	chr22:3672910-3672924	M06479-NR2F2	-	15	0.680	39.8654	15.452
chr22:3672670-3673005	-1.39	ptprsa	6.37	5212	chr22:3672912-3672921	M05542-NR2F2	-	10	0.879	39.8654	15.452
chr9:21257048-21257343	-1.39	hao2	5.90	78641	NA	NA	NA	NA	NA	39.8654	15.452
chr16:53612288-53612849	-1.29	kif13a	3.52	46175	chr16:53612553-53612567	M09889-NR2F6	-	15	0.659	39.8654	16.5557
chr16:53612288-53612849	-1.29	kif13a	3.52	46175	chr16:53612696-53612708	M02591-NR2F1	-	13	0.786	39.8654	16.5557
chr16:53612288-53612849	-1.29	kif13a	3.52	46175	chr16:53612696-53612708	M05954-NR2F1	-	13	0.786	39.8654	16.5557
chr16:53612288-53612849	-1.29	kif13a	3.52	46175	chr16:53612699-53612706	M05953-NR2F1	-	8	0.902	39.8654	16.5557
chr16:53612288-53612849	-1.29	kif13a	3.52	46175	chr16:53612699-53612708	M06478-NR2F2	-	10	0.759	39.8654	16.5557
chr16:53612288-53612849	-1.29	kif13a	3.52	46175	chr16:53612700-53612706	M03840-NR2F1	-	7	0.937	39.8654	16.5557
chr16:53612288-53612849	-1.29	kif13a	3.52	46175	chr16:53612700-53612707	M01984-NR2F6	-	8	0.965	39.8654	16.5557
chr16:53612288-53612849	-1.29	kif13a	3.52	46175	chr16:53612700-53612707	M05541-NR2F2	-	8	0.860	39.8654	16.5557
chr16:53612288-53612849	-1.29	kif13a	3.52	46175	chr16:53612700-53612708	M06477-NR2F1	-	9	0.709	39.8654	16.5557
chr16:53612288-53612849	-1.29	kif13a	3.52	46175	chr16:53612700-53612711	M06476-NR2F1	-	12	0.638	39.8654	16.5557
chr16:53612288-53612849	-1.29	kif13a	3.52	46175	chr16:53612760-53612767	M05541-NR2F2	-	8	0.688	39.8654	16.5557
chr16:53612288-53612849	-1.29	kif13a	3.52	46175	chr16:53612802-53612811	M05542-NR2F2	-	10	0.659	39.8654	16.5557
chr25:30663043-30663711	-1.20	LOC108181660	-3.03	22829	chr25:30663373-30663380	M05953-NR2F1	-	8	0.806	39.8654	17.6594
chr25:30663043-30663711	-1.20	LOC108181660	-3.03	22829	chr25:30663373-30663382	M06478-NR2F2	-	10	0.650	39.8654	17.6594
chr25:30663043-30663711	-1.20	LOC108181660	-3.03	22829	chr25:30663374-30663380	M03840-NR2F1	-	7	1.000	39.8654	17.6594
chr25:30663043-30663711	-1.20	LOC108181660	-3.03	22829	chr25:30663374-30663381	M01984-NR2F6	-	8	0.916	39.8654	17.6594
chr25:30663043-30663711	-1.20	LOC108181660	-3.03	22829	chr25:30663374-30663381	M05541-NR2F2	-	8	0.815	39.8654	17.6594
chr25:30663043-30663711	-1.20	LOC108181660	-3.03	22829	chr25:30663374-30663382	M06477-NR2F1	-	9	0.699	39.8654	17.6594
chr25:30663043-30663711	-1.20	LOC108181660	-3.03	22829	chr25:30663396-30663402	M03840-NR2F1	-	7	0.611	39.8654	17.6594
chr25:30663043-30663711	-1.20	LOC108181660	-3.03	22829	chr25:30663492-30663501	M05542-NR2F2	-	10	0.690	39.8654	17.6594
chr25:30663043-30663711	-1.20	tnni2a.4	-1.10	36228	chr25:30663373-30663380	M05953-NR2F1	-	8	0.806	39.8654	17.6594
chr25:30663043-30663711	-1.20	tnni2a.4	-1.10	36228	chr25:30663373-30663382	M06478-NR2F2	-	10	0.650	39.8654	17.6594
chr25:30663043-30663711	-1.20	tnni2a.4	-1.10	36228	chr25:30663374-30663380	M03840-NR2F1	-	7	1.000	39.8654	17.6594
chr25:30663043-30663711	-1.20	tnni2a.4	-1.10	36228	chr25:30663374-30663381	M01984-NR2F6	-	8	0.916	39.8654	17.6594
chr25:30663043-30663711	-1.20	tnni2a.4	-1.10	36228	chr25:30663374-30663381	M05541-NR2F2	-	8	0.815	39.8654	17.6594
chr25:30663043-30663711	-1.20	tnni2a.4	-1.10	36228	chr25:30663374-30663382	M06477-NR2F1	-	9	0.699	39.8654	17.6594
chr25:30663043-30663711	-1.20	tnni2a.4	-1.10	36228	chr25:30663396-30663402	M03840-NR2F1	-	7	0.611	39.8654	17.6594
chr25:30663043-30663711	-1.20	tnni2a.4	-1.10	36228	chr25:30663492-30663501	M05542-NR2F2	-	10	0.690	39.8654	17.6594
chr13:8451889-8452306	-1.20	mcfd2	-1.43	91059	chr13:8452093-8452102	M05542-NR2F2	-	10	0.639	39.8654	17.6594
chr13:31538727-31539108	-1.11	mnat1	3.56	322	NA	NA	NA	NA	NA	39.8654	18.7631
chr19:25538223-25538602	-1.11	ptp4a3	-1.02	7742	NA	NA	NA	NA	NA	39.8654	18.7631
chr21:97527-97919	-1.11	gsdf	-2.87	76967	chr21:97716-97723	M05541-NR2F2	-	8	0.688	39.8654	18.7631
chr24:39768858-39769306	-1.03	stub1	-1.56	0	chr24:39769285-39769292	M05953-NR2F1	-	8	0.670	39.8654	19.8668
chr24:39768858-39769306	-1.03	stub1	-1.56	0	chr24:39769286-39769292	M03840-NR2F1	-	7	0.798	39.8654	19.8668
chr24:39768858-39769306	-1.03	stub1	-1.56	0	chr24:39769286-39769293	M01984-NR2F6	-	8	0.869	39.8654	19.8668
chr9:12737521-12738110	-1.03	myo10l3	6.03	2478	NA	NA	NA	NA	NA	39.8654	19.8668
chr24:39768858-39769306	-1.03	luc7l	1.92	2574	chr24:39769285-39769292	M05953-NR2F1	-	8	0.670	39.8654	19.8668
chr24:39768858-39769306	-1.03	luc7l	1.92	2574	chr24:39769286-39769292	M03840-NR2F1	-	7	0.798	39.8654	19.8668
chr24:39768858-39769306	-1.03	luc7l	1.92	2574	chr24:39769286-39769293	M01984-NR2F6	-	8	0.869	39.8654	19.8668
chr3:16845240-16845638	-1.03	ptrfa	3.31	15741	chr3:16845436-16845442	M03840-NR2F1	-	7	0.609	39.8654	19.8668
chr3:16845240-16845638	-1.03	ptrfa	3.31	15741	chr3:16845436-16845443	M05541-NR2F2	-	8	0.630	39.8654	19.8668
chr3:16845240-16845638	-1.03	ptrfa	3.31	15741	chr3:16845436-16845444	M06477-NR2F1	-	9	0.666	39.8654	19.8668
chr12:319222-319815	-1.36	ict1	-1.65	42604	chr12:319640-319646	M03840-NR2F1	-	7	0.609	38.9594	15.452
chr12:319222-319815	-1.36	ict1	-1.65	42604	chr12:319703-319710	M05953-NR2F1	-	8	0.921	38.9594	15.452
chr12:319222-319815	-1.36	ict1	-1.65	42604	chr12:319704-319710	M03840-NR2F1	-	7	0.807	38.9594	15.452
chr12:319222-319815	-1.36	ict1	-1.65	42604	chr12:319704-319711	M01984-NR2F6	-	8	0.970	38.9594	15.452
chr2:44381023-44381571	-1.26	cadm3	5.97	50552	chr2:44381194-44381201	M05953-NR2F1	-	8	0.670	38.9594	16.5557
chr2:44381023-44381571	-1.26	cadm3	5.97	50552	chr2:44381195-44381201	M03840-NR2F1	-	7	0.798	38.9594	16.5557
chr2:44381023-44381571	-1.26	cadm3	5.97	50552	chr2:44381195-44381202	M01984-NR2F6	-	8	0.848	38.9594	16.5557
chr2:44381023-44381571	-1.26	lig1	1.75	66906	chr2:44381194-44381201	M05953-NR2F1	-	8	0.670	38.9594	16.5557
chr2:44381023-44381571	-1.26	lig1	1.75	66906	chr2:44381195-44381201	M03840-NR2F1	-	7	0.798	38.9594	16.5557
chr2:44381023-44381571	-1.26	lig1	1.75	66906	chr2:44381195-44381202	M01984-NR2F6	-	8	0.848	38.9594	16.5557
chr9:12733138-12733540	-1.16	myo10l3	6.03	7048	chr9:12733247-12733254	M05953-NR2F1	-	8	0.806	38.9594	17.6594
chr9:12733138-12733540	-1.16	myo10l3	6.03	7048	chr9:12733247-12733256	M06478-NR2F2	-	10	0.650	38.9594	17.6594
chr9:12733138-12733540	-1.16	myo10l3	6.03	7048	chr9:12733248-12733254	M03840-NR2F1	-	7	1.000	38.9594	17.6594
chr9:12733138-12733540	-1.16	myo10l3	6.03	7048	chr9:12733248-12733255	M01984-NR2F6	-	8	0.916	38.9594	17.6594
chr9:12733138-12733540	-1.16	myo10l3	6.03	7048	chr9:12733248-12733255	M05541-NR2F2	-	8	0.815	38.9594	17.6594
chr9:12733138-12733540	-1.16	myo10l3	6.03	7048	chr9:12733248-12733256	M06477-NR2F1	-	9	0.699	38.9594	17.6594
chr9:12733138-12733540	-1.16	myo10l3	6.03	7048	chr9:12733306-12733313	M01984-NR2F6	-	8	0.734	38.9594	17.6594
chr9:12733138-12733540	-1.16	pttg1ipb	2.70	45196	chr9:12733247-12733254	M05953-NR2F1	-	8	0.806	38.9594	17.6594
chr9:12733138-12733540	-1.16	pttg1ipb	2.70	45196	chr9:12733247-12733256	M06478-NR2F2	-	10	0.650	38.9594	17.6594
chr9:12733138-12733540	-1.16	pttg1ipb	2.70	45196	chr9:12733248-12733254	M03840-NR2F1	-	7	1.000	38.9594	17.6594
chr9:12733138-12733540	-1.16	pttg1ipb	2.70	45196	chr9:12733248-12733255	M01984-NR2F6	-	8	0.916	38.9594	17.6594
chr9:12733138-12733540	-1.16	pttg1ipb	2.70	45196	chr9:12733248-12733255	M05541-NR2F2	-	8	0.815	38.9594	17.6594
chr9:12733138-12733540	-1.16	pttg1ipb	2.70	45196	chr9:12733248-12733256	M06477-NR2F1	-	9	0.699	38.9594	17.6594
chr9:12733138-12733540	-1.16	pttg1ipb	2.70	45196	chr9:12733306-12733313	M01984-NR2F6	-	8	0.734	38.9594	17.6594
chr15:2796520-2796961	-1.16	mre11a	3.74	97317	chr15:2796760-2796767	M05953-NR2F1	-	8	0.705	38.9594	17.6594
chr15:2796520-2796961	-1.16	mre11a	3.74	97317	chr15:2796761-2796767	M03840-NR2F1	-	7	0.729	38.9594	17.6594
chr15:2796520-2796961	-1.16	mre11a	3.74	97317	chr15:2796761-2796768	M01984-NR2F6	-	8	0.871	38.9594	17.6594
chr23:30039621-30040130	-1.08	dvl1a	6.51	0	chr23:30039707-30039714	M05541-NR2F2	-	8	0.623	38.9594	18.7631
chr23:30039621-30040130	-1.08	tmem201	6.21	108074	chr23:30039707-30039714	M05541-NR2F2	-	8	0.623	38.9594	18.7631
chr16:20823267-20823546	-1.08	cpvl	2.21	114167	chr16:20823441-20823448	M05953-NR2F1	-	8	0.825	38.9594	18.7631
chr16:20823267-20823546	-1.08	cpvl	2.21	114167	chr16:20823442-20823448	M03840-NR2F1	-	7	0.870	38.9594	18.7631
chr16:20823267-20823546	-1.08	cpvl	2.21	114167	chr16:20823442-20823449	M01984-NR2F6	-	8	0.933	38.9594	18.7631
chr24:4380890-4381405	-1.81	ccny	3.82	0	chr24:4380929-4380936	M01984-NR2F6	-	8	0.779	38.0534	11.0371
chr20:20484177-20484696	-1.81	prkchb	6.51	359	chr20:20484470-20484484	M06479-NR2F2	-	15	0.604	38.0534	11.0371
chr20:20484177-20484696	-1.81	prkchb	6.51	359	chr20:20484472-20484481	M05542-NR2F2	-	10	0.662	38.0534	11.0371
chr13:24614089-24614885	-1.67	col17a1b	5.68	4918	chr13:24614560-24614569	M06478-NR2F2	-	10	0.614	38.0534	12.1408
chr13:24614089-24614885	-1.67	col17a1b	5.68	4918	chr13:24614561-24614568	M05541-NR2F2	-	8	0.738	38.0534	12.1408
chr20:54204467-54205041	-1.32	hsp90aa1.2	-1.42	12296	chr20:54204685-54204692	M05953-NR2F1	-	8	0.705	38.0534	15.452
chr20:54204467-54205041	-1.32	hsp90aa1.2	-1.42	12296	chr20:54204686-54204692	M03840-NR2F1	-	7	0.729	38.0534	15.452
chr20:54204467-54205041	-1.32	hsp90aa1.2	-1.42	12296	chr20:54204686-54204693	M01984-NR2F6	-	8	0.871	38.0534	15.452
chr20:54204467-54205041	-1.32	hsp90aa1.2	-1.42	12296	chr20:54204761-54204768	M05541-NR2F2	-	8	0.740	38.0534	15.452
chr2:31807902-31808158	-1.32	and2	1.28	23469	NA	NA	NA	NA	NA	38.0534	15.452
chr15:15908451-15908847	-1.32	synrg	-1.62	41195	NA	NA	NA	NA	NA	38.0534	15.452
chr5:38281984-38282535	-1.22	fras1	7.29	3811	chr5:38282170-38282177	M01984-NR2F6	-	8	0.810	38.0534	16.5557
chr20:41979597-41979941	-1.22	pln	-2.64	33794	chr20:41979803-41979810	M05541-NR2F2	-	8	0.702	38.0534	16.5557
chr5:38281984-38282535	-1.22	mrpl1	-1.08	47574	chr5:38282170-38282177	M01984-NR2F6	-	8	0.810	38.0534	16.5557
chr21:30376193-30376481	-1.22	lcp2a	-5.06	65277	chr21:30376201-30376207	M03840-NR2F1	-	7	0.674	38.0534	16.5557
chr16:34074561-34075255	-1.22	gpn2	2.48	84864	chr16:34075124-34075136	M02591-NR2F1	-	13	0.684	38.0534	16.5557
chr16:34074561-34075255	-1.22	gpn2	2.48	84864	chr16:34075124-34075136	M05954-NR2F1	-	13	0.684	38.0534	16.5557
chr16:34074561-34075255	-1.22	gpn2	2.48	84864	chr16:34075124-34075138	M03841-NR2F2	-	15	0.603	38.0534	16.5557
chr16:34074561-34075255	-1.22	gpn2	2.48	84864	chr16:34075127-34075134	M05953-NR2F1	-	8	0.904	38.0534	16.5557
chr16:34074561-34075255	-1.22	gpn2	2.48	84864	chr16:34075127-34075136	M06478-NR2F2	-	10	0.879	38.0534	16.5557
chr16:34074561-34075255	-1.22	gpn2	2.48	84864	chr16:34075128-34075134	M03840-NR2F1	-	7	0.870	38.0534	16.5557
chr16:34074561-34075255	-1.22	gpn2	2.48	84864	chr16:34075128-34075135	M01984-NR2F6	-	8	0.960	38.0534	16.5557
chr16:34074561-34075255	-1.22	gpn2	2.48	84864	chr16:34075128-34075135	M05541-NR2F2	-	8	0.767	38.0534	16.5557
chr16:34074561-34075255	-1.22	gpn2	2.48	84864	chr16:34075128-34075136	M06477-NR2F1	-	9	0.863	38.0534	16.5557
chr16:34074561-34075255	-1.22	gpn2	2.48	84864	chr16:34075128-34075139	M06476-NR2F1	-	12	0.659	38.0534	16.5557
chr21:30376193-30376481	-1.22	slc7a3a	3.22	88826	chr21:30376201-30376207	M03840-NR2F1	-	7	0.674	38.0534	16.5557
chr6:19035540-19035991	-1.22	stk11ip	4.40	97999	chr6:19035620-19035627	M05953-NR2F1	-	8	0.678	38.0534	16.5557
chr6:19035540-19035991	-1.22	stk11ip	4.40	97999	chr6:19035621-19035627	M03840-NR2F1	-	7	0.859	38.0534	16.5557
chr6:19035540-19035991	-1.22	stk11ip	4.40	97999	chr6:19035621-19035628	M01984-NR2F6	-	8	0.806	38.0534	16.5557
chr6:19035540-19035991	-1.22	stk11ip	4.40	97999	chr6:19035696-19035703	M05541-NR2F2	-	8	0.604	38.0534	16.5557
chr21:30376193-30376481	-1.22	rab39ba	6.37	127289	chr21:30376201-30376207	M03840-NR2F1	-	7	0.674	38.0534	16.5557
chr1:37639564-37640027	-1.13	fbxo8	6.15	2078	chr1:37639768-37639774	M03840-NR2F1	-	7	0.672	38.0534	17.6594
chr1:37639564-37640027	-1.13	fbxo8	6.15	2078	chr1:37639768-37639775	M05541-NR2F2	-	8	0.770	38.0534	17.6594
chr1:37639564-37640027	-1.13	fbxo8	6.15	2078	chr1:37639929-37639943	M09876-NR2F1	-	15	0.818	38.0534	17.6594
chr1:37639564-37640027	-1.13	fbxo8	6.15	2078	chr1:37639929-37639943	M09878-NR2F1	-	15	0.780	38.0534	17.6594
chr1:37639564-37640027	-1.13	fbxo8	6.15	2078	chr1:37639929-37639943	M09880-NR2F1	-	15	0.717	38.0534	17.6594
chr1:37639564-37640027	-1.13	fbxo8	6.15	2078	chr1:37639929-37639943	M09882-NR2F1	-	15	0.756	38.0534	17.6594
chr1:37639564-37640027	-1.13	fbxo8	6.15	2078	chr1:37639929-37639943	M09884-NR2F6	-	15	0.676	38.0534	17.6594
chr1:37639564-37640027	-1.13	fbxo8	6.15	2078	chr1:37639929-37639943	M09886-NR2F6	-	15	0.698	38.0534	17.6594
chr1:37639564-37640027	-1.13	fbxo8	6.15	2078	chr1:37639929-37639943	M09888-NR2F6	-	15	0.785	38.0534	17.6594
chr1:37639564-37640027	-1.13	fbxo8	6.15	2078	chr1:37639929-37639943	M09890-NR2F6	-	15	0.768	38.0534	17.6594
chr1:37639564-37640027	-1.13	fbxo8	6.15	2078	chr1:37639933-37639947	M03841-NR2F2	-	15	0.618	38.0534	17.6594
chr1:37639564-37640027	-1.13	fbxo8	6.15	2078	chr1:37639936-37639945	M06478-NR2F2	-	10	0.660	38.0534	17.6594
chr1:37639564-37640027	-1.13	fbxo8	6.15	2078	chr1:37639937-37639943	M03840-NR2F1	-	7	0.611	38.0534	17.6594
chr1:37639564-37640027	-1.13	fbxo8	6.15	2078	chr1:37639937-37639944	M05541-NR2F2	-	8	0.616	38.0534	17.6594
chr1:37639564-37640027	-1.13	fbxo8	6.15	2078	chr1:37639937-37639945	M06477-NR2F1	-	9	0.779	38.0534	17.6594
chr1:37639564-37640027	-1.13	fbxo8	6.15	2078	chr1:37639937-37639948	M06476-NR2F1	-	12	0.689	38.0534	17.6594
chr1:37639564-37640027	-1.13	cep44	5.68	3143	chr1:37639768-37639774	M03840-NR2F1	-	7	0.672	38.0534	17.6594
chr1:37639564-37640027	-1.13	cep44	5.68	3143	chr1:37639768-37639775	M05541-NR2F2	-	8	0.770	38.0534	17.6594
chr1:37639564-37640027	-1.13	cep44	5.68	3143	chr1:37639929-37639943	M09876-NR2F1	-	15	0.818	38.0534	17.6594
chr1:37639564-37640027	-1.13	cep44	5.68	3143	chr1:37639929-37639943	M09878-NR2F1	-	15	0.780	38.0534	17.6594
chr1:37639564-37640027	-1.13	cep44	5.68	3143	chr1:37639929-37639943	M09880-NR2F1	-	15	0.717	38.0534	17.6594
chr1:37639564-37640027	-1.13	cep44	5.68	3143	chr1:37639929-37639943	M09882-NR2F1	-	15	0.756	38.0534	17.6594
chr1:37639564-37640027	-1.13	cep44	5.68	3143	chr1:37639929-37639943	M09884-NR2F6	-	15	0.676	38.0534	17.6594
chr1:37639564-37640027	-1.13	cep44	5.68	3143	chr1:37639929-37639943	M09886-NR2F6	-	15	0.698	38.0534	17.6594
chr1:37639564-37640027	-1.13	cep44	5.68	3143	chr1:37639929-37639943	M09888-NR2F6	-	15	0.785	38.0534	17.6594
chr1:37639564-37640027	-1.13	cep44	5.68	3143	chr1:37639929-37639943	M09890-NR2F6	-	15	0.768	38.0534	17.6594
chr1:37639564-37640027	-1.13	cep44	5.68	3143	chr1:37639933-37639947	M03841-NR2F2	-	15	0.618	38.0534	17.6594
chr1:37639564-37640027	-1.13	cep44	5.68	3143	chr1:37639936-37639945	M06478-NR2F2	-	10	0.660	38.0534	17.6594
chr1:37639564-37640027	-1.13	cep44	5.68	3143	chr1:37639937-37639943	M03840-NR2F1	-	7	0.611	38.0534	17.6594
chr1:37639564-37640027	-1.13	cep44	5.68	3143	chr1:37639937-37639944	M05541-NR2F2	-	8	0.616	38.0534	17.6594
chr1:37639564-37640027	-1.13	cep44	5.68	3143	chr1:37639937-37639945	M06477-NR2F1	-	9	0.779	38.0534	17.6594
chr1:37639564-37640027	-1.13	cep44	5.68	3143	chr1:37639937-37639948	M06476-NR2F1	-	12	0.689	38.0534	17.6594
chr7:40710690-40711249	-1.04	eng2a	6.86	0	chr7:40710717-40710723	M03840-NR2F1	-	7	0.672	38.0534	18.7631
chr7:40710690-40711249	-1.04	eng2a	6.86	0	chr7:40710717-40710724	M05541-NR2F2	-	8	0.770	38.0534	18.7631
chr23:27587116-27587524	-1.04	larp4aa	-1.58	0	chr23:27587226-27587232	M03840-NR2F1	-	7	0.609	38.0534	18.7631
chr23:27587116-27587524	-1.04	larp4aa	-1.58	0	chr23:27587367-27587381	M06479-NR2F2	-	15	0.751	38.0534	18.7631
chr23:27587116-27587524	-1.04	larp4aa	-1.58	0	chr23:27587369-27587378	M05542-NR2F2	-	10	0.760	38.0534	18.7631
chr23:27587116-27587524	-1.04	larp4aa	-1.58	0	chr23:27587376-27587385	M05542-NR2F2	-	10	0.690	38.0534	18.7631
chr5:50159833-50160339	-1.04	LOC103911114	6.46	8600	chr5:50160330-50160337	M05541-NR2F2	-	8	0.730	38.0534	18.7631
chr5:50159833-50160339	-1.04	LOC103911114	6.46	8600	chr5:50160330-50160338	M06477-NR2F1	-	9	0.633	38.0534	18.7631
chr24:5908955-5909343	-1.04	mastl	-2.14	30038	NA	NA	NA	NA	NA	38.0534	18.7631
chr22:36869477-36870033	-1.04	lamp3	-9.28	52605	chr22:36869484-36869490	M03840-NR2F1	-	7	0.636	38.0534	18.7631
chr22:36869477-36870033	-1.04	lamp3	-9.28	52605	chr22:36869484-36869491	M05541-NR2F2	-	8	0.793	38.0534	18.7631
chr18:18553935-18554390	-1.51	lonp2	6.15	18378	chr18:18554122-18554129	M01984-NR2F6	-	8	0.736	37.1473	13.2446
chr18:18553935-18554390	-1.51	lonp2	6.15	18378	chr18:18554229-18554236	M05541-NR2F2	-	8	0.604	37.1473	13.2446
chr23:32925366-32925644	-1.51	plxna2	-2.81	26501	chr23:32925480-32925487	M05953-NR2F1	-	8	0.805	37.1473	13.2446
chr23:32925366-32925644	-1.51	plxna2	-2.81	26501	chr23:32925481-32925487	M03840-NR2F1	-	7	0.870	37.1473	13.2446
chr23:32925366-32925644	-1.51	plxna2	-2.81	26501	chr23:32925481-32925488	M01984-NR2F6	-	8	0.951	37.1473	13.2446
chr18:45706303-45706837	-1.39	cstf3	1.34	30627	chr18:45706322-45706328	M03840-NR2F1	-	7	0.636	37.1473	14.3483
chr13:32730214-32730651	-1.29	rock2a	-1.57	4115	chr13:32730408-32730415	M01984-NR2F6	-	8	0.732	37.1473	15.452
chr13:32730214-32730651	-1.29	rock2a	-1.57	4115	chr13:32730611-32730618	M05953-NR2F1	-	8	0.684	37.1473	15.452
chr13:32730214-32730651	-1.29	rock2a	-1.57	4115	chr13:32730612-32730618	M03840-NR2F1	-	7	0.729	37.1473	15.452
chr13:32730214-32730651	-1.29	rock2a	-1.57	4115	chr13:32730612-32730619	M01984-NR2F6	-	8	0.843	37.1473	15.452
chr10:33466789-33467119	-1.29	mdh2	-1.01	18531	NA	NA	NA	NA	NA	37.1473	15.452
chr16:25823542-25824296	-1.19	tomm40	-1.33	57877	chr16:25824020-25824029	M05542-NR2F2	-	10	0.822	37.1473	16.5557
chr16:25823542-25824296	-1.19	tomm40	-1.33	57877	chr16:25824138-25824144	M03840-NR2F1	-	7	0.611	37.1473	16.5557
chr16:25823542-25824296	-1.19	tomm40	-1.33	57877	chr16:25824167-25824174	M01984-NR2F6	-	8	0.810	37.1473	16.5557
chr9:11660398-11661318	-1.09	zc3h15	-1.41	32430	chr9:11660927-11660934	M05953-NR2F1	-	8	0.650	37.1473	17.6594
chr9:11660398-11661318	-1.09	zc3h15	-1.41	32430	chr9:11660928-11660934	M03840-NR2F1	-	7	0.798	37.1473	17.6594
chr9:11660398-11661318	-1.09	zc3h15	-1.41	32430	chr9:11660928-11660935	M01984-NR2F6	-	8	0.851	37.1473	17.6594
chr9:11660398-11661318	-1.09	zc3h15	-1.41	32430	chr9:11661077-11661084	M05953-NR2F1	-	8	0.765	37.1473	17.6594
chr9:11660398-11661318	-1.09	zc3h15	-1.41	32430	chr9:11661078-11661084	M03840-NR2F1	-	7	0.859	37.1473	17.6594
chr9:11660398-11661318	-1.09	zc3h15	-1.41	32430	chr9:11661078-11661085	M01984-NR2F6	-	8	0.806	37.1473	17.6594
chr14:42692972-42693366	-1.09	pcdh10b	1.77	59343	chr14:42693066-42693072	M03840-NR2F1	-	7	0.611	37.1473	17.6594
chr3:41700335-41700719	-1.09	lfng	4.59	74920	NA	NA	NA	NA	NA	37.1473	17.6594
chr5:39696425-39696797	-1.01	hspb3	-1.11	0	chr5:39696562-39696569	M05953-NR2F1	-	8	0.641	37.1473	18.7631
chr5:39696425-39696797	-1.01	hspb3	-1.11	0	chr5:39696562-39696571	M06478-NR2F2	-	10	0.649	37.1473	18.7631
chr5:39696425-39696797	-1.01	hspb3	-1.11	0	chr5:39696563-39696570	M01984-NR2F6	-	8	0.840	37.1473	18.7631
chr5:39696425-39696797	-1.01	hspb3	-1.11	0	chr5:39696563-39696571	M06477-NR2F1	-	9	0.606	37.1473	18.7631
chr24:26251505-26251937	-1.01	skilb	3.85	9806	chr24:26251569-26251576	M05953-NR2F1	-	8	0.678	37.1473	18.7631
chr24:26251505-26251937	-1.01	skilb	3.85	9806	chr24:26251570-26251576	M03840-NR2F1	-	7	0.859	37.1473	18.7631
chr24:26251505-26251937	-1.01	skilb	3.85	9806	chr24:26251570-26251577	M01984-NR2F6	-	8	0.827	37.1473	18.7631
chr24:26251505-26251937	-1.01	skilb	3.85	9806	chr24:26251570-26251578	M06477-NR2F1	-	9	0.619	37.1473	18.7631
chr24:26251505-26251937	-1.01	skilb	3.85	9806	chr24:26251601-26251618	M06693-NR2F6	-	18	0.654	37.1473	18.7631
chr24:26251505-26251937	-1.01	skilb	3.85	9806	chr24:26251606-26251612	M03840-NR2F1	-	7	0.674	37.1473	18.7631
chr24:26251505-26251937	-1.01	skilb	3.85	9806	chr24:26251606-26251613	M05541-NR2F2	-	8	0.756	37.1473	18.7631
chr24:26251505-26251937	-1.01	skilb	3.85	9806	chr24:26251606-26251614	M06477-NR2F1	-	9	0.694	37.1473	18.7631
chr24:26251505-26251937	-1.01	skilb	3.85	9806	chr24:26251899-26251906	M05541-NR2F2	-	8	0.730	37.1473	18.7631
chr14:16246296-16246637	-1.01	mgat4b	-1.64	16728	NA	NA	NA	NA	NA	37.1473	18.7631
chr24:26251505-26251937	-1.01	cldn11b	6.09	35571	chr24:26251569-26251576	M05953-NR2F1	-	8	0.678	37.1473	18.7631
chr24:26251505-26251937	-1.01	cldn11b	6.09	35571	chr24:26251570-26251576	M03840-NR2F1	-	7	0.859	37.1473	18.7631
chr24:26251505-26251937	-1.01	cldn11b	6.09	35571	chr24:26251570-26251577	M01984-NR2F6	-	8	0.827	37.1473	18.7631
chr24:26251505-26251937	-1.01	cldn11b	6.09	35571	chr24:26251570-26251578	M06477-NR2F1	-	9	0.619	37.1473	18.7631
chr24:26251505-26251937	-1.01	cldn11b	6.09	35571	chr24:26251601-26251618	M06693-NR2F6	-	18	0.654	37.1473	18.7631
chr24:26251505-26251937	-1.01	cldn11b	6.09	35571	chr24:26251606-26251612	M03840-NR2F1	-	7	0.674	37.1473	18.7631
chr24:26251505-26251937	-1.01	cldn11b	6.09	35571	chr24:26251606-26251613	M05541-NR2F2	-	8	0.756	37.1473	18.7631
chr24:26251505-26251937	-1.01	cldn11b	6.09	35571	chr24:26251606-26251614	M06477-NR2F1	-	9	0.694	37.1473	18.7631
chr24:26251505-26251937	-1.01	cldn11b	6.09	35571	chr24:26251899-26251906	M05541-NR2F2	-	8	0.730	37.1473	18.7631
chr24:26251505-26251937	-1.01	rpl22l1	-1.14	78204	chr24:26251569-26251576	M05953-NR2F1	-	8	0.678	37.1473	18.7631
chr24:26251505-26251937	-1.01	rpl22l1	-1.14	78204	chr24:26251570-26251576	M03840-NR2F1	-	7	0.859	37.1473	18.7631
chr24:26251505-26251937	-1.01	rpl22l1	-1.14	78204	chr24:26251570-26251577	M01984-NR2F6	-	8	0.827	37.1473	18.7631
chr24:26251505-26251937	-1.01	rpl22l1	-1.14	78204	chr24:26251570-26251578	M06477-NR2F1	-	9	0.619	37.1473	18.7631
chr24:26251505-26251937	-1.01	rpl22l1	-1.14	78204	chr24:26251601-26251618	M06693-NR2F6	-	18	0.654	37.1473	18.7631
chr24:26251505-26251937	-1.01	rpl22l1	-1.14	78204	chr24:26251606-26251612	M03840-NR2F1	-	7	0.674	37.1473	18.7631
chr24:26251505-26251937	-1.01	rpl22l1	-1.14	78204	chr24:26251606-26251613	M05541-NR2F2	-	8	0.756	37.1473	18.7631
chr24:26251505-26251937	-1.01	rpl22l1	-1.14	78204	chr24:26251606-26251614	M06477-NR2F1	-	9	0.694	37.1473	18.7631
chr24:26251505-26251937	-1.01	rpl22l1	-1.14	78204	chr24:26251899-26251906	M05541-NR2F2	-	8	0.730	37.1473	18.7631
chr24:26251505-26251937	-1.01	eif5a	-1.03	84870	chr24:26251569-26251576	M05953-NR2F1	-	8	0.678	37.1473	18.7631
chr24:26251505-26251937	-1.01	eif5a	-1.03	84870	chr24:26251570-26251576	M03840-NR2F1	-	7	0.859	37.1473	18.7631
chr24:26251505-26251937	-1.01	eif5a	-1.03	84870	chr24:26251570-26251577	M01984-NR2F6	-	8	0.827	37.1473	18.7631
chr24:26251505-26251937	-1.01	eif5a	-1.03	84870	chr24:26251570-26251578	M06477-NR2F1	-	9	0.619	37.1473	18.7631
chr24:26251505-26251937	-1.01	eif5a	-1.03	84870	chr24:26251601-26251618	M06693-NR2F6	-	18	0.654	37.1473	18.7631
chr24:26251505-26251937	-1.01	eif5a	-1.03	84870	chr24:26251606-26251612	M03840-NR2F1	-	7	0.674	37.1473	18.7631
chr24:26251505-26251937	-1.01	eif5a	-1.03	84870	chr24:26251606-26251613	M05541-NR2F2	-	8	0.756	37.1473	18.7631
chr24:26251505-26251937	-1.01	eif5a	-1.03	84870	chr24:26251606-26251614	M06477-NR2F1	-	9	0.694	37.1473	18.7631
chr24:26251505-26251937	-1.01	eif5a	-1.03	84870	chr24:26251899-26251906	M05541-NR2F2	-	8	0.730	37.1473	18.7631
chr10:42041543-42041940	-1.74	orai1b	6.41	43820	NA	NA	NA	NA	NA	36.2413	11.0371
chr19:11232510-11232920	-1.60	arhgef1a	6.15	44194	NA	NA	NA	NA	NA	36.2413	12.1408
chr11:38882276-38882769	-1.47	cdc42	1.76	2090	chr11:38882590-38882602	M02591-NR2F1	-	13	0.683	36.2413	13.2446
chr11:38882276-38882769	-1.47	cdc42	1.76	2090	chr11:38882590-38882602	M05954-NR2F1	-	13	0.683	36.2413	13.2446
chr11:38882276-38882769	-1.47	cdc42	1.76	2090	chr11:38882593-38882600	M05953-NR2F1	-	8	0.806	36.2413	13.2446
chr11:38882276-38882769	-1.47	cdc42	1.76	2090	chr11:38882593-38882602	M06478-NR2F2	-	10	0.683	36.2413	13.2446
chr11:38882276-38882769	-1.47	cdc42	1.76	2090	chr11:38882594-38882600	M03840-NR2F1	-	7	1.000	36.2413	13.2446
chr11:38882276-38882769	-1.47	cdc42	1.76	2090	chr11:38882594-38882601	M01984-NR2F6	-	8	0.916	36.2413	13.2446
chr11:38882276-38882769	-1.47	cdc42	1.76	2090	chr11:38882594-38882601	M05541-NR2F2	-	8	0.815	36.2413	13.2446
chr11:38882276-38882769	-1.47	cdc42	1.76	2090	chr11:38882594-38882602	M06477-NR2F1	-	9	0.639	36.2413	13.2446
chr11:38882276-38882769	-1.47	p3h1	2.00	38986	chr11:38882590-38882602	M02591-NR2F1	-	13	0.683	36.2413	13.2446
chr11:38882276-38882769	-1.47	p3h1	2.00	38986	chr11:38882590-38882602	M05954-NR2F1	-	13	0.683	36.2413	13.2446
chr11:38882276-38882769	-1.47	p3h1	2.00	38986	chr11:38882593-38882600	M05953-NR2F1	-	8	0.806	36.2413	13.2446
chr11:38882276-38882769	-1.47	p3h1	2.00	38986	chr11:38882593-38882602	M06478-NR2F2	-	10	0.683	36.2413	13.2446
chr11:38882276-38882769	-1.47	p3h1	2.00	38986	chr11:38882594-38882600	M03840-NR2F1	-	7	1.000	36.2413	13.2446
chr11:38882276-38882769	-1.47	p3h1	2.00	38986	chr11:38882594-38882601	M01984-NR2F6	-	8	0.916	36.2413	13.2446
chr11:38882276-38882769	-1.47	p3h1	2.00	38986	chr11:38882594-38882601	M05541-NR2F2	-	8	0.815	36.2413	13.2446
chr11:38882276-38882769	-1.47	p3h1	2.00	38986	chr11:38882594-38882602	M06477-NR2F1	-	9	0.639	36.2413	13.2446
chr3:45346438-45346777	-1.47	samd1a	5.76	43901	NA	NA	NA	NA	NA	36.2413	13.2446
chr10:17630104-17630489	-1.36	smarcad1b	3.13	0	NA	NA	NA	NA	NA	36.2413	14.3483
chr18:15855301-15855861	-1.36	nudt4a	-2.32	4957	chr18:15855713-15855719	M03840-NR2F1	-	7	0.609	36.2413	14.3483
chr18:15855301-15855861	-1.36	nudt4a	-2.32	4957	chr18:15855746-15855760	M06479-NR2F2	-	15	0.608	36.2413	14.3483
chr18:15855301-15855861	-1.36	eea1	-2.40	17076	chr18:15855713-15855719	M03840-NR2F1	-	7	0.609	36.2413	14.3483
chr18:15855301-15855861	-1.36	eea1	-2.40	17076	chr18:15855746-15855760	M06479-NR2F2	-	15	0.608	36.2413	14.3483
chr13:38691830-38692320	-1.36	lmbrd1	4.17	25660	NA	NA	NA	NA	NA	36.2413	14.3483
chr18:15855301-15855861	-1.36	ube2na	-1.06	30651	chr18:15855713-15855719	M03840-NR2F1	-	7	0.609	36.2413	14.3483
chr18:15855301-15855861	-1.36	ube2na	-1.06	30651	chr18:15855746-15855760	M06479-NR2F2	-	15	0.608	36.2413	14.3483
chr14:6673390-6673684	-1.25	eif4ebp3l	-1.35	4258	NA	NA	NA	NA	NA	36.2413	15.452
chr14:6673390-6673684	-1.25	hnrnpaba	1.50	13987	NA	NA	NA	NA	NA	36.2413	15.452
chr6:7431253-7431854	-1.25	ubn2a	5.97	70553	NA	NA	NA	NA	NA	36.2413	15.452
chr8:8992175-8992800	-1.15	bcap31	3.40	1585	chr8:8992492-8992498	M03840-NR2F1	-	7	0.611	36.2413	16.5557
chr8:8992175-8992800	-1.15	bcap31	3.40	1585	chr8:8992492-8992499	M05541-NR2F2	-	8	0.616	36.2413	16.5557
chr8:25728594-25728981	-1.15	suv39h1b	3.56	2843	chr8:25728633-25728642	M05542-NR2F2	-	10	0.650	36.2413	16.5557
chr8:25728594-25728981	-1.15	suv39h1b	3.56	2843	chr8:25728726-25728732	M03840-NR2F1	-	7	0.674	36.2413	16.5557
chr8:25728594-25728981	-1.15	suv39h1b	3.56	2843	chr8:25728726-25728733	M05541-NR2F2	-	8	0.756	36.2413	16.5557
chr8:25728594-25728981	-1.15	suv39h1b	3.56	2843	chr8:25728726-25728734	M06477-NR2F1	-	9	0.694	36.2413	16.5557
chr12:34267853-34268306	-1.15	tha1	4.85	9274	NA	NA	NA	NA	NA	36.2413	16.5557
chr8:25728594-25728981	-1.15	tmem9	5.90	13502	chr8:25728633-25728642	M05542-NR2F2	-	10	0.650	36.2413	16.5557
chr8:25728594-25728981	-1.15	tmem9	5.90	13502	chr8:25728726-25728732	M03840-NR2F1	-	7	0.674	36.2413	16.5557
chr8:25728594-25728981	-1.15	tmem9	5.90	13502	chr8:25728726-25728733	M05541-NR2F2	-	8	0.756	36.2413	16.5557
chr8:25728594-25728981	-1.15	tmem9	5.90	13502	chr8:25728726-25728734	M06477-NR2F1	-	9	0.694	36.2413	16.5557
chr13:22481695-22482091	-1.06	mmrn2a	-1.29	6437	NA	NA	NA	NA	NA	36.2413	17.6594
chr23:64337-64815	-1.06	hdac7a	-6.70	11668	NA	NA	NA	NA	NA	36.2413	17.6594
chr7:39160007-39160449	-1.06	tnnt3b	-1.02	13407	chr7:39160023-39160040	M06693-NR2F6	-	18	0.628	36.2413	17.6594
chr7:39160007-39160449	-1.06	tnnt3b	-1.02	13407	chr7:39160030-39160047	M06693-NR2F6	-	18	0.649	36.2413	17.6594
chr7:39160007-39160449	-1.06	tnnt3b	-1.02	13407	chr7:39160035-39160048	M03927-NR2F6	-	14	0.834	36.2413	17.6594
chr7:39160007-39160449	-1.06	tnnt3b	-1.02	13407	chr7:39160038-39160050	M02591-NR2F1	-	13	0.906	36.2413	17.6594
chr7:39160007-39160449	-1.06	tnnt3b	-1.02	13407	chr7:39160038-39160050	M05954-NR2F1	-	13	0.906	36.2413	17.6594
chr7:39160007-39160449	-1.06	tnnt3b	-1.02	13407	chr7:39160038-39160052	M03841-NR2F2	-	15	0.735	36.2413	17.6594
chr7:39160007-39160449	-1.06	tnnt3b	-1.02	13407	chr7:39160041-39160048	M05953-NR2F1	-	8	0.885	36.2413	17.6594
chr7:39160007-39160449	-1.06	tnnt3b	-1.02	13407	chr7:39160041-39160050	M06478-NR2F2	-	10	0.874	36.2413	17.6594
chr7:39160007-39160449	-1.06	tnnt3b	-1.02	13407	chr7:39160042-39160048	M03840-NR2F1	-	7	1.000	36.2413	17.6594
chr7:39160007-39160449	-1.06	tnnt3b	-1.02	13407	chr7:39160042-39160049	M01984-NR2F6	-	8	0.925	36.2413	17.6594
chr7:39160007-39160449	-1.06	tnnt3b	-1.02	13407	chr7:39160042-39160049	M05541-NR2F2	-	8	1.000	36.2413	17.6594
chr7:39160007-39160449	-1.06	tnnt3b	-1.02	13407	chr7:39160042-39160050	M06477-NR2F1	-	9	0.818	36.2413	17.6594
chr11:29843900-29844462	-1.06	scml2	2.64	14536	chr11:29844066-29844073	M05541-NR2F2	-	8	0.688	36.2413	17.6594
chr11:29843900-29844462	-1.06	scml2	2.64	14536	chr11:29844113-29844120	M05953-NR2F1	-	8	0.678	36.2413	17.6594
chr11:29843900-29844462	-1.06	scml2	2.64	14536	chr11:29844114-29844120	M03840-NR2F1	-	7	0.859	36.2413	17.6594
chr11:29843900-29844462	-1.06	scml2	2.64	14536	chr11:29844114-29844121	M01984-NR2F6	-	8	0.806	36.2413	17.6594
chr7:39160007-39160449	-1.06	tnni2b.2	-1.00	38160	chr7:39160023-39160040	M06693-NR2F6	-	18	0.628	36.2413	17.6594
chr7:39160007-39160449	-1.06	tnni2b.2	-1.00	38160	chr7:39160030-39160047	M06693-NR2F6	-	18	0.649	36.2413	17.6594
chr7:39160007-39160449	-1.06	tnni2b.2	-1.00	38160	chr7:39160035-39160048	M03927-NR2F6	-	14	0.834	36.2413	17.6594
chr7:39160007-39160449	-1.06	tnni2b.2	-1.00	38160	chr7:39160038-39160050	M02591-NR2F1	-	13	0.906	36.2413	17.6594
chr7:39160007-39160449	-1.06	tnni2b.2	-1.00	38160	chr7:39160038-39160050	M05954-NR2F1	-	13	0.906	36.2413	17.6594
chr7:39160007-39160449	-1.06	tnni2b.2	-1.00	38160	chr7:39160038-39160052	M03841-NR2F2	-	15	0.735	36.2413	17.6594
chr7:39160007-39160449	-1.06	tnni2b.2	-1.00	38160	chr7:39160041-39160048	M05953-NR2F1	-	8	0.885	36.2413	17.6594
chr7:39160007-39160449	-1.06	tnni2b.2	-1.00	38160	chr7:39160041-39160050	M06478-NR2F2	-	10	0.874	36.2413	17.6594
chr7:39160007-39160449	-1.06	tnni2b.2	-1.00	38160	chr7:39160042-39160048	M03840-NR2F1	-	7	1.000	36.2413	17.6594
chr7:39160007-39160449	-1.06	tnni2b.2	-1.00	38160	chr7:39160042-39160049	M01984-NR2F6	-	8	0.925	36.2413	17.6594
chr7:39160007-39160449	-1.06	tnni2b.2	-1.00	38160	chr7:39160042-39160049	M05541-NR2F2	-	8	1.000	36.2413	17.6594
chr7:39160007-39160449	-1.06	tnni2b.2	-1.00	38160	chr7:39160042-39160050	M06477-NR2F1	-	9	0.818	36.2413	17.6594
chr11:24480238-24480505	-1.06	rnpep	3.36	40902	chr11:24480257-24480263	M03840-NR2F1	-	7	0.636	36.2413	17.6594
chr15:46042641-46043049	-1.06	LOC100002043	5.83	50189	NA	NA	NA	NA	NA	36.2413	17.6594
chr13:22481695-22482091	-1.06	glud1a	3.67	66542	NA	NA	NA	NA	NA	36.2413	17.6594
chr11:24480238-24480505	-1.06	cyb5r1	-2.85	68297	chr11:24480257-24480263	M03840-NR2F1	-	7	0.636	36.2413	17.6594
chr11:24480238-24480505	-1.06	adipor1a	1.89	81949	chr11:24480257-24480263	M03840-NR2F1	-	7	0.636	36.2413	17.6594
chr16:5396097-5396496	-1.06	bckdhb	2.99	190429	chr16:5396301-5396308	M01984-NR2F6	-	8	0.734	36.2413	17.6594
chr2:59531292-59532123	1.07	ncana	3.31	0	chr2:59531538-59531545	M01984-NR2F6	-	8	0.734	35.3353	75.0525
chr23:35641594-35642113	-1.70	mfsd5	4.27	46026	chr23:35641874-35641881	M05541-NR2F2	-	8	0.763	35.3353	11.0371
chr6:504337-504995	-1.44	lgals2b	-7.38	74657	NA	NA	NA	NA	NA	35.3353	13.2446
chr4:8012786-8013308	-1.22	optn	-2.96	0	chr4:8012920-8012935	M03710-NR2F2	-	16	0.660	35.3353	15.452
chr4:8012786-8013308	-1.22	optn	-2.96	0	chr4:8012923-8012932	M05542-NR2F2	-	10	0.702	35.3353	15.452
chr4:8012786-8013308	-1.22	optn	-2.96	0	chr4:8013053-8013060	M05541-NR2F2	-	8	0.653	35.3353	15.452
chr24:24986407-24986864	-1.22	phldb2b	3.97	2920	chr24:24986417-24986423	M03840-NR2F1	-	7	0.672	35.3353	15.452
chr24:24986407-24986864	-1.22	phldb2b	3.97	2920	chr24:24986487-24986493	M03840-NR2F1	-	7	0.609	35.3353	15.452
chr24:24986407-24986864	-1.22	phldb2b	3.97	2920	chr24:24986487-24986494	M05541-NR2F2	-	8	0.630	35.3353	15.452
chr24:24986407-24986864	-1.22	phldb2b	3.97	2920	chr24:24986487-24986495	M06477-NR2F1	-	9	0.666	35.3353	15.452
chr24:24986407-24986864	-1.22	phldb2b	3.97	2920	chr24:24986487-24986498	M06476-NR2F1	-	12	0.694	35.3353	15.452
chr24:24986407-24986864	-1.22	phldb2b	3.97	2920	chr24:24986487-24986500	M03927-NR2F6	-	14	0.660	35.3353	15.452
chr24:24986407-24986864	-1.22	phldb2b	3.97	2920	chr24:24986518-24986524	M03840-NR2F1	-	7	0.609	35.3353	15.452
chr1:25366424-25366689	-1.22	ndufb6	-1.22	38871	chr1:25366591-25366597	M03840-NR2F1	-	7	0.672	35.3353	15.452
chr1:11395914-11396408	-1.22	tspan5b	7.86	88005	chr1:11396012-11396019	M05953-NR2F1	-	8	0.678	35.3353	15.452
chr1:11395914-11396408	-1.22	tspan5b	7.86	88005	chr1:11396013-11396019	M03840-NR2F1	-	7	0.859	35.3353	15.452
chr1:11395914-11396408	-1.22	tspan5b	7.86	88005	chr1:11396013-11396020	M01984-NR2F6	-	8	0.806	35.3353	15.452
chr1:11395914-11396408	-1.22	tspan5b	7.86	88005	chr1:11396304-11396316	M02591-NR2F1	-	13	0.791	35.3353	15.452
chr1:11395914-11396408	-1.22	tspan5b	7.86	88005	chr1:11396304-11396316	M05954-NR2F1	-	13	0.791	35.3353	15.452
chr1:11395914-11396408	-1.22	tspan5b	7.86	88005	chr1:11396307-11396314	M05953-NR2F1	-	8	0.921	35.3353	15.452
chr1:11395914-11396408	-1.22	tspan5b	7.86	88005	chr1:11396307-11396316	M06478-NR2F2	-	10	0.764	35.3353	15.452
chr1:11395914-11396408	-1.22	tspan5b	7.86	88005	chr1:11396308-11396314	M03840-NR2F1	-	7	0.807	35.3353	15.452
chr1:11395914-11396408	-1.22	tspan5b	7.86	88005	chr1:11396308-11396315	M01984-NR2F6	-	8	1.000	35.3353	15.452
chr1:11395914-11396408	-1.22	tspan5b	7.86	88005	chr1:11396308-11396315	M05541-NR2F2	-	8	0.627	35.3353	15.452
chr1:11395914-11396408	-1.22	tspan5b	7.86	88005	chr1:11396308-11396316	M06477-NR2F1	-	9	0.754	35.3353	15.452
chr19:3125284-3125698	-1.12	bop1	4.97	10135	chr19:3125498-3125505	M05541-NR2F2	-	8	0.744	35.3353	16.5557
chr19:3125284-3125698	-1.12	bop1	4.97	10135	chr19:3125654-3125661	M05541-NR2F2	-	8	0.604	35.3353	16.5557
chr23:39521702-39522138	-1.12	mical1	-7.08	47163	NA	NA	NA	NA	NA	35.3353	16.5557
chr10:35155959-35156307	-1.12	supt20	-2.22	47606	NA	NA	NA	NA	NA	35.3353	16.5557
chr13:7716697-7717112	-1.12	LOC556339	-5.74	59685	NA	NA	NA	NA	NA	35.3353	16.5557
chr10:36776972-36777488	-1.12	dhrs13a.2	5.39	63495	chr10:36777194-36777208	M09890-NR2F6	-	15	0.611	35.3353	16.5557
chr10:36776972-36777488	-1.12	ucp3	-1.54	64035	chr10:36777194-36777208	M09890-NR2F6	-	15	0.611	35.3353	16.5557
chr10:35155959-35156307	-1.12	alg5	2.70	97262	NA	NA	NA	NA	NA	35.3353	16.5557
chr4:3078646-3079262	-1.02	plekha5	2.14	3361	chr4:3078860-3078867	M01984-NR2F6	-	8	0.773	35.3353	17.6594
chr4:3078646-3079262	-1.02	plekha5	2.14	3361	chr4:3078944-3078951	M05541-NR2F2	-	8	0.740	35.3353	17.6594
chr3:50343075-50343432	-1.02	dnm2a	-1.21	3384	chr3:50343137-50343149	M02591-NR2F1	-	13	0.655	35.3353	17.6594
chr3:50343075-50343432	-1.02	dnm2a	-1.21	3384	chr3:50343137-50343149	M05954-NR2F1	-	13	0.655	35.3353	17.6594
chr3:50343075-50343432	-1.02	dnm2a	-1.21	3384	chr3:50343137-50343151	M03841-NR2F2	-	15	0.606	35.3353	17.6594
chr3:50343075-50343432	-1.02	dnm2a	-1.21	3384	chr3:50343140-50343147	M05953-NR2F1	-	8	0.798	35.3353	17.6594
chr3:50343075-50343432	-1.02	dnm2a	-1.21	3384	chr3:50343140-50343149	M06478-NR2F2	-	10	0.758	35.3353	17.6594
chr3:50343075-50343432	-1.02	dnm2a	-1.21	3384	chr3:50343141-50343147	M03840-NR2F1	-	7	1.000	35.3353	17.6594
chr3:50343075-50343432	-1.02	dnm2a	-1.21	3384	chr3:50343141-50343148	M01984-NR2F6	-	8	0.925	35.3353	17.6594
chr3:50343075-50343432	-1.02	dnm2a	-1.21	3384	chr3:50343141-50343148	M05541-NR2F2	-	8	1.000	35.3353	17.6594
chr3:50343075-50343432	-1.02	dnm2a	-1.21	3384	chr3:50343141-50343149	M06477-NR2F1	-	9	0.818	35.3353	17.6594
chr25:18837085-18837633	-1.02	parietopsin	2.95	12988	NA	NA	NA	NA	NA	35.3353	17.6594
chr18:44483394-44483753	-1.02	aplp2	-1.33	23449	chr18:44483574-44483580	M03840-NR2F1	-	7	0.611	35.3353	17.6594
chr8:44497403-44497669	-1.02	mhc1laa	3.82	40776	NA	NA	NA	NA	NA	35.3353	17.6594
chr3:40395213-40395500	-1.02	tnrc18	-1.77	48226	NA	NA	NA	NA	NA	35.3353	17.6594
chr13:9726152-9726663	-1.66	srbd1	5.76	54512	chr13:9726255-9726262	M05953-NR2F1	-	8	0.785	34.4292	11.0371
chr13:9726152-9726663	-1.66	srbd1	5.76	54512	chr13:9726255-9726264	M06478-NR2F2	-	10	0.700	34.4292	11.0371
chr13:9726152-9726663	-1.66	srbd1	5.76	54512	chr13:9726256-9726262	M03840-NR2F1	-	7	1.000	34.4292	11.0371
chr13:9726152-9726663	-1.66	srbd1	5.76	54512	chr13:9726256-9726263	M01984-NR2F6	-	8	0.898	34.4292	11.0371
chr13:9726152-9726663	-1.66	srbd1	5.76	54512	chr13:9726256-9726263	M05541-NR2F2	-	8	0.778	34.4292	11.0371
chr13:9726152-9726663	-1.66	srbd1	5.76	54512	chr13:9726256-9726264	M06477-NR2F1	-	9	0.811	34.4292	11.0371
chr13:9726152-9726663	-1.66	srbd1	5.76	54512	chr13:9726400-9726406	M03840-NR2F1	-	7	0.672	34.4292	11.0371
chr15:30908058-30908523	-1.53	msi2b	2.17	19309	NA	NA	NA	NA	NA	34.4292	12.1408
chr15:30908058-30908523	-1.53	akap1b	-1.14	49013	NA	NA	NA	NA	NA	34.4292	12.1408
chr15:30908058-30908523	-1.53	nf1a	2.63	72501	NA	NA	NA	NA	NA	34.4292	12.1408
chr5:59867222-59867550	-1.40	tmem132e	-1.96	19822	NA	NA	NA	NA	NA	34.4292	13.2446
chr6:60097521-60097890	-1.40	aurka	7.92	32242	NA	NA	NA	NA	NA	34.4292	13.2446
chr11:37728601-37728878	-1.28	slc41a1	-7.47	65	NA	NA	NA	NA	NA	34.4292	14.3483
chr21:35943055-35943463	-1.28	sgcd	-2.55	62500	chr21:35943157-35943164	M05953-NR2F1	-	8	0.697	34.4292	14.3483
chr21:35943055-35943463	-1.28	sgcd	-2.55	62500	chr21:35943158-35943164	M03840-NR2F1	-	7	0.729	34.4292	14.3483
chr21:35943055-35943463	-1.28	sgcd	-2.55	62500	chr21:35943158-35943165	M01984-NR2F6	-	8	0.871	34.4292	14.3483
chr21:35943055-35943463	-1.28	sgcd	-2.55	62500	chr21:35943158-35943166	M06477-NR2F1	-	9	0.661	34.4292	14.3483
chr21:35943055-35943463	-1.28	sgcd	-2.55	62500	chr21:35943158-35943169	M06476-NR2F1	-	12	0.609	34.4292	14.3483
chr21:35943055-35943463	-1.28	sgcd	-2.55	62500	chr21:35943332-35943339	M01984-NR2F6	-	8	0.732	34.4292	14.3483
chr1:6862717-6863011	-1.18	mylz3	-1.04	0	chr1:6862816-6862823	M05953-NR2F1	-	8	0.765	34.4292	15.452
chr1:6862717-6863011	-1.18	mylz3	-1.04	0	chr1:6862816-6862825	M06478-NR2F2	-	10	0.645	34.4292	15.452
chr1:6862717-6863011	-1.18	mylz3	-1.04	0	chr1:6862817-6862823	M03840-NR2F1	-	7	0.859	34.4292	15.452
chr1:6862717-6863011	-1.18	mylz3	-1.04	0	chr1:6862817-6862824	M01984-NR2F6	-	8	0.806	34.4292	15.452
chr1:6862717-6863011	-1.18	mylz3	-1.04	0	chr1:6862817-6862825	M06477-NR2F1	-	9	0.620	34.4292	15.452
chr19:32102736-32103107	-1.18	fam65b	-8.42	3752	NA	NA	NA	NA	NA	34.4292	15.452
chr1:6862717-6863011	-1.18	pcnp	-1.30	10521	chr1:6862816-6862823	M05953-NR2F1	-	8	0.765	34.4292	15.452
chr1:6862717-6863011	-1.18	pcnp	-1.30	10521	chr1:6862816-6862825	M06478-NR2F2	-	10	0.645	34.4292	15.452
chr1:6862717-6863011	-1.18	pcnp	-1.30	10521	chr1:6862817-6862823	M03840-NR2F1	-	7	0.859	34.4292	15.452
chr1:6862717-6863011	-1.18	pcnp	-1.30	10521	chr1:6862817-6862824	M01984-NR2F6	-	8	0.806	34.4292	15.452
chr1:6862717-6863011	-1.18	pcnp	-1.30	10521	chr1:6862817-6862825	M06477-NR2F1	-	9	0.620	34.4292	15.452
chr8:36887996-36888418	-1.18	iqsec2	4.35	21946	NA	NA	NA	NA	NA	34.4292	15.452
chr19:32102736-32103107	-1.18	acot13	-1.04	110667	NA	NA	NA	NA	NA	34.4292	15.452
chr3:26913300-26913786	-1.08	LOC108182821	-7.19	1019	chr3:26913459-26913465	M03840-NR2F1	-	7	0.636	34.4292	16.5557
chr3:26913300-26913786	-1.08	LOC108182821	-7.19	1019	chr3:26913459-26913466	M05541-NR2F2	-	8	0.608	34.4292	16.5557
chr3:26913300-26913786	-1.08	LOC108182821	-7.19	1019	chr3:26913474-26913480	M03840-NR2F1	-	7	0.674	34.4292	16.5557
chr3:26913300-26913786	-1.08	LOC108182821	-7.19	1019	chr3:26913608-26913617	M05542-NR2F2	-	10	0.657	34.4292	16.5557
chr17:28611448-28611789	-1.08	mis18bp1	3.65	5052	NA	NA	NA	NA	NA	34.4292	16.5557
chr3:26913300-26913786	-1.08	atf7ip2	2.26	13460	chr3:26913459-26913465	M03840-NR2F1	-	7	0.636	34.4292	16.5557
chr3:26913300-26913786	-1.08	atf7ip2	2.26	13460	chr3:26913459-26913466	M05541-NR2F2	-	8	0.608	34.4292	16.5557
chr3:26913300-26913786	-1.08	atf7ip2	2.26	13460	chr3:26913474-26913480	M03840-NR2F1	-	7	0.674	34.4292	16.5557
chr3:26913300-26913786	-1.08	atf7ip2	2.26	13460	chr3:26913608-26913617	M05542-NR2F2	-	10	0.657	34.4292	16.5557
chr9:21510594-21511047	-1.08	ift88	-3.56	43708	NA	NA	NA	NA	NA	34.4292	16.5557
chr13:29871650-29872294	-2.36	scdb	4.17	5415	chr13:29871796-29871810	M09875-NR2F1	-	15	0.637	33.5232	6.62228
chr13:29871650-29872294	-2.36	scdb	4.17	5415	chr13:29871796-29871810	M09877-NR2F1	-	15	0.638	33.5232	6.62228
chr13:29871650-29872294	-2.36	scdb	4.17	5415	chr13:29871796-29871810	M09881-NR2F1	-	15	0.600	33.5232	6.62228
chr13:29871650-29872294	-2.36	scdb	4.17	5415	chr13:29871796-29871810	M09887-NR2F6	-	15	0.669	33.5232	6.62228
chr13:29871650-29872294	-2.36	scdb	4.17	5415	chr13:29871796-29871810	M09889-NR2F6	-	15	0.651	33.5232	6.62228
chr13:29871650-29872294	-2.36	scdb	4.17	5415	chr13:29871803-29871810	M05953-NR2F1	-	8	0.769	33.5232	6.62228
chr13:29871650-29872294	-2.36	scdb	4.17	5415	chr13:29871804-29871810	M03840-NR2F1	-	7	0.668	33.5232	6.62228
chr13:29871650-29872294	-2.36	scdb	4.17	5415	chr13:29871804-29871811	M01984-NR2F6	-	8	0.886	33.5232	6.62228
chr13:29871650-29872294	-2.36	scdb	4.17	5415	chr13:29871811-29871824	M03927-NR2F6	-	14	0.623	33.5232	6.62228
chr13:29871650-29872294	-2.36	scdb	4.17	5415	chr13:29872084-29872098	M06479-NR2F2	-	15	0.741	33.5232	6.62228
chr13:29871650-29872294	-2.36	scdb	4.17	5415	chr13:29872086-29872095	M05542-NR2F2	-	10	0.760	33.5232	6.62228
chr13:29871650-29872294	-2.36	scdb	4.17	5415	chr13:29872093-29872102	M05542-NR2F2	-	10	0.653	33.5232	6.62228
chr13:29871650-29872294	-2.36	dnajb12a	1.64	32663	chr13:29871796-29871810	M09875-NR2F1	-	15	0.637	33.5232	6.62228
chr13:29871650-29872294	-2.36	dnajb12a	1.64	32663	chr13:29871796-29871810	M09877-NR2F1	-	15	0.638	33.5232	6.62228
chr13:29871650-29872294	-2.36	dnajb12a	1.64	32663	chr13:29871796-29871810	M09881-NR2F1	-	15	0.600	33.5232	6.62228
chr13:29871650-29872294	-2.36	dnajb12a	1.64	32663	chr13:29871796-29871810	M09887-NR2F6	-	15	0.669	33.5232	6.62228
chr13:29871650-29872294	-2.36	dnajb12a	1.64	32663	chr13:29871796-29871810	M09889-NR2F6	-	15	0.651	33.5232	6.62228
chr13:29871650-29872294	-2.36	dnajb12a	1.64	32663	chr13:29871803-29871810	M05953-NR2F1	-	8	0.769	33.5232	6.62228
chr13:29871650-29872294	-2.36	dnajb12a	1.64	32663	chr13:29871804-29871810	M03840-NR2F1	-	7	0.668	33.5232	6.62228
chr13:29871650-29872294	-2.36	dnajb12a	1.64	32663	chr13:29871804-29871811	M01984-NR2F6	-	8	0.886	33.5232	6.62228
chr13:29871650-29872294	-2.36	dnajb12a	1.64	32663	chr13:29871811-29871824	M03927-NR2F6	-	14	0.623	33.5232	6.62228
chr13:29871650-29872294	-2.36	dnajb12a	1.64	32663	chr13:29872084-29872098	M06479-NR2F2	-	15	0.741	33.5232	6.62228
chr13:29871650-29872294	-2.36	dnajb12a	1.64	32663	chr13:29872086-29872095	M05542-NR2F2	-	10	0.760	33.5232	6.62228
chr13:29871650-29872294	-2.36	dnajb12a	1.64	32663	chr13:29872093-29872102	M05542-NR2F2	-	10	0.653	33.5232	6.62228
chr13:29871650-29872294	-2.36	cuedc2	3.23	65842	chr13:29871796-29871810	M09875-NR2F1	-	15	0.637	33.5232	6.62228
chr13:29871650-29872294	-2.36	cuedc2	3.23	65842	chr13:29871796-29871810	M09877-NR2F1	-	15	0.638	33.5232	6.62228
chr13:29871650-29872294	-2.36	cuedc2	3.23	65842	chr13:29871796-29871810	M09881-NR2F1	-	15	0.600	33.5232	6.62228
chr13:29871650-29872294	-2.36	cuedc2	3.23	65842	chr13:29871796-29871810	M09887-NR2F6	-	15	0.669	33.5232	6.62228
chr13:29871650-29872294	-2.36	cuedc2	3.23	65842	chr13:29871796-29871810	M09889-NR2F6	-	15	0.651	33.5232	6.62228
chr13:29871650-29872294	-2.36	cuedc2	3.23	65842	chr13:29871803-29871810	M05953-NR2F1	-	8	0.769	33.5232	6.62228
chr13:29871650-29872294	-2.36	cuedc2	3.23	65842	chr13:29871804-29871810	M03840-NR2F1	-	7	0.668	33.5232	6.62228
chr13:29871650-29872294	-2.36	cuedc2	3.23	65842	chr13:29871804-29871811	M01984-NR2F6	-	8	0.886	33.5232	6.62228
chr13:29871650-29872294	-2.36	cuedc2	3.23	65842	chr13:29871811-29871824	M03927-NR2F6	-	14	0.623	33.5232	6.62228
chr13:29871650-29872294	-2.36	cuedc2	3.23	65842	chr13:29872084-29872098	M06479-NR2F2	-	15	0.741	33.5232	6.62228
chr13:29871650-29872294	-2.36	cuedc2	3.23	65842	chr13:29872086-29872095	M05542-NR2F2	-	10	0.760	33.5232	6.62228
chr13:29871650-29872294	-2.36	cuedc2	3.23	65842	chr13:29872093-29872102	M05542-NR2F2	-	10	0.653	33.5232	6.62228
chr10:352422-352956	-1.62	vaspa	-4.18	11507	chr10:352784-352798	M06479-NR2F2	-	15	0.647	33.5232	11.0371
chr17:14892593-14893039	-1.62	txndc16	5.59	17785	chr17:14893001-14893015	M03841-NR2F2	-	15	0.672	33.5232	11.0371
chr17:14892593-14893039	-1.62	txndc16	5.59	17785	chr17:14893004-14893011	M05953-NR2F1	-	8	0.798	33.5232	11.0371
chr17:14892593-14893039	-1.62	txndc16	5.59	17785	chr17:14893004-14893013	M06478-NR2F2	-	10	0.763	33.5232	11.0371
chr17:14892593-14893039	-1.62	txndc16	5.59	17785	chr17:14893004-14893018	M05951-NR2F1	-	15	0.630	33.5232	11.0371
chr17:14892593-14893039	-1.62	txndc16	5.59	17785	chr17:14893004-14893018	M09875-NR2F1	-	15	0.601	33.5232	11.0371
chr17:14892593-14893039	-1.62	txndc16	5.59	17785	chr17:14893004-14893018	M09877-NR2F1	-	15	0.630	33.5232	11.0371
chr17:14892593-14893039	-1.62	txndc16	5.59	17785	chr17:14893004-14893018	M09881-NR2F1	-	15	0.617	33.5232	11.0371
chr17:14892593-14893039	-1.62	txndc16	5.59	17785	chr17:14893004-14893018	M09883-NR2F6	-	15	0.603	33.5232	11.0371
chr17:14892593-14893039	-1.62	txndc16	5.59	17785	chr17:14893004-14893018	M09887-NR2F6	-	15	0.657	33.5232	11.0371
chr17:14892593-14893039	-1.62	txndc16	5.59	17785	chr17:14893004-14893018	M09889-NR2F6	-	15	0.712	33.5232	11.0371
chr17:14892593-14893039	-1.62	txndc16	5.59	17785	chr17:14893005-14893011	M03840-NR2F1	-	7	1.000	33.5232	11.0371
chr17:14892593-14893039	-1.62	txndc16	5.59	17785	chr17:14893005-14893012	M01984-NR2F6	-	8	0.895	33.5232	11.0371
chr17:14892593-14893039	-1.62	txndc16	5.59	17785	chr17:14893005-14893012	M05541-NR2F2	-	8	0.764	33.5232	11.0371
chr17:14892593-14893039	-1.62	txndc16	5.59	17785	chr17:14893005-14893013	M06477-NR2F1	-	9	0.822	33.5232	11.0371
chr17:14892593-14893039	-1.62	txndc16	5.59	17785	chr17:14893005-14893016	M06476-NR2F1	-	12	0.849	33.5232	11.0371
chr17:14892593-14893039	-1.62	txndc16	5.59	17785	chr17:14893005-14893018	M05957-NR2F6	-	14	0.753	33.5232	11.0371
chr10:352422-352956	-1.62	akt2l	1.86	31299	chr10:352784-352798	M06479-NR2F2	-	15	0.647	33.5232	11.0371
chr14:17355321-17355649	-1.62	rab33a	-3.39	61555	chr14:17355571-17355579	M06477-NR2F1	-	9	0.668	33.5232	11.0371
chr9:33484862-33485213	-1.49	rpl8	-1.00	27145	NA	NA	NA	NA	NA	33.5232	12.1408
chr11:22245561-22246139	-1.49	tmem183a	3.12	34083	NA	NA	NA	NA	NA	33.5232	12.1408
chr9:33484862-33485213	-1.49	caska	2.32	69926	NA	NA	NA	NA	NA	33.5232	12.1408
chr19:47746672-47747000	-1.49	tfap2e	4.62	124820	chr19:47746715-47746721	M03840-NR2F1	-	7	0.611	33.5232	12.1408
chr9:22565636-22565912	-1.36	crygs4	-8.28	15764	chr9:22565724-22565733	M05542-NR2F2	-	10	0.753	33.5232	13.2446
chr15:18108737-18109040	-1.36	tmprss5	5.76	119210	NA	NA	NA	NA	NA	33.5232	13.2446
chr15:29248913-29249246	-1.25	rap1gap2a	-6.84	7365	NA	NA	NA	NA	NA	33.5232	14.3483
chr6:50557442-50557864	-1.25	mtss1	-2.19	23855	NA	NA	NA	NA	NA	33.5232	14.3483
chr18:40812131-40812433	-1.14	vaspb	-1.62	151	NA	NA	NA	NA	NA	33.5232	15.452
chr12:25671808-25672164	-1.14	prkcea	8.28	1712	chr12:25672064-25672071	M05541-NR2F2	-	8	0.653	33.5232	15.452
chr2:24860963-24861377	-1.14	rps28	-1.17	6917	chr2:24861031-24861045	M03841-NR2F2	-	15	0.608	33.5232	15.452
chr2:24860963-24861377	-1.14	rps28	-1.17	6917	chr2:24861034-24861041	M05953-NR2F1	-	8	0.650	33.5232	15.452
chr2:24860963-24861377	-1.14	rps28	-1.17	6917	chr2:24861035-24861041	M03840-NR2F1	-	7	0.798	33.5232	15.452
chr2:24860963-24861377	-1.14	rps28	-1.17	6917	chr2:24861035-24861042	M01984-NR2F6	-	8	0.878	33.5232	15.452
chr2:24860963-24861377	-1.14	rps28	-1.17	6917	chr2:24861035-24861042	M05541-NR2F2	-	8	0.757	33.5232	15.452
chr2:24860963-24861377	-1.14	rps28	-1.17	6917	chr2:24861159-24861166	M05953-NR2F1	-	8	0.904	33.5232	15.452
chr2:24860963-24861377	-1.14	rps28	-1.17	6917	chr2:24861159-24861168	M06478-NR2F2	-	10	0.698	33.5232	15.452
chr2:24860963-24861377	-1.14	rps28	-1.17	6917	chr2:24861160-24861166	M03840-NR2F1	-	7	0.870	33.5232	15.452
chr2:24860963-24861377	-1.14	rps28	-1.17	6917	chr2:24861160-24861167	M01984-NR2F6	-	8	0.960	33.5232	15.452
chr2:24860963-24861377	-1.14	rps28	-1.17	6917	chr2:24861160-24861167	M05541-NR2F2	-	8	0.767	33.5232	15.452
chr2:24860963-24861377	-1.14	rps28	-1.17	6917	chr2:24861160-24861168	M06477-NR2F1	-	9	0.670	33.5232	15.452
chr2:24860963-24861377	-1.14	rps28	-1.17	6917	chr2:24861168-24861185	M06693-NR2F6	-	18	0.633	33.5232	15.452
chr2:24860963-24861377	-1.14	rps28	-1.17	6917	chr2:24861247-24861254	M01984-NR2F6	-	8	0.835	33.5232	15.452
chr2:24860963-24861377	-1.14	rps28	-1.17	6917	chr2:24861343-24861357	M05951-NR2F1	-	15	0.637	33.5232	15.452
chr2:24860963-24861377	-1.14	rps28	-1.17	6917	chr2:24861343-24861357	M09875-NR2F1	-	15	0.793	33.5232	15.452
chr2:24860963-24861377	-1.14	rps28	-1.17	6917	chr2:24861343-24861357	M09877-NR2F1	-	15	0.871	33.5232	15.452
chr2:24860963-24861377	-1.14	rps28	-1.17	6917	chr2:24861343-24861357	M09879-NR2F1	-	15	0.773	33.5232	15.452
chr2:24860963-24861377	-1.14	rps28	-1.17	6917	chr2:24861343-24861357	M09881-NR2F1	-	15	0.854	33.5232	15.452
chr2:24860963-24861377	-1.14	rps28	-1.17	6917	chr2:24861343-24861357	M09883-NR2F6	-	15	0.717	33.5232	15.452
chr2:24860963-24861377	-1.14	rps28	-1.17	6917	chr2:24861343-24861357	M09885-NR2F6	-	15	0.758	33.5232	15.452
chr2:24860963-24861377	-1.14	rps28	-1.17	6917	chr2:24861343-24861357	M09887-NR2F6	-	15	0.802	33.5232	15.452
chr2:24860963-24861377	-1.14	rps28	-1.17	6917	chr2:24861343-24861357	M09889-NR2F6	-	15	0.843	33.5232	15.452
chr2:24860963-24861377	-1.14	rps28	-1.17	6917	chr2:24861344-24861357	M03927-NR2F6	-	14	0.784	33.5232	15.452
chr2:24860963-24861377	-1.14	rps28	-1.17	6917	chr2:24861344-24861357	M05956-NR2F6	-	14	0.670	33.5232	15.452
chr2:24860963-24861377	-1.14	rps28	-1.17	6917	chr2:24861344-24861357	M05957-NR2F6	-	14	0.715	33.5232	15.452
chr2:24860963-24861377	-1.14	rps28	-1.17	6917	chr2:24861347-24861359	M02591-NR2F1	-	13	0.870	33.5232	15.452
chr2:24860963-24861377	-1.14	rps28	-1.17	6917	chr2:24861347-24861359	M05954-NR2F1	-	13	0.870	33.5232	15.452
chr2:24860963-24861377	-1.14	rps28	-1.17	6917	chr2:24861347-24861361	M03841-NR2F2	-	15	0.784	33.5232	15.452
chr2:24860963-24861377	-1.14	rps28	-1.17	6917	chr2:24861350-24861357	M05953-NR2F1	-	8	0.885	33.5232	15.452
chr2:24860963-24861377	-1.14	rps28	-1.17	6917	chr2:24861350-24861359	M06478-NR2F2	-	10	0.880	33.5232	15.452
chr2:24860963-24861377	-1.14	rps28	-1.17	6917	chr2:24861351-24861357	M03840-NR2F1	-	7	1.000	33.5232	15.452
chr2:24860963-24861377	-1.14	rps28	-1.17	6917	chr2:24861351-24861358	M01984-NR2F6	-	8	0.895	33.5232	15.452
chr2:24860963-24861377	-1.14	rps28	-1.17	6917	chr2:24861351-24861358	M05541-NR2F2	-	8	0.764	33.5232	15.452
chr2:24860963-24861377	-1.14	rps28	-1.17	6917	chr2:24861351-24861359	M06477-NR2F1	-	9	0.822	33.5232	15.452
chr2:24860963-24861377	-1.14	rps28	-1.17	6917	chr2:24861351-24861362	M06476-NR2F1	-	12	0.606	33.5232	15.452
chr9:23081822-23082125	-1.14	arl5a	1.54	9871	NA	NA	NA	NA	NA	33.5232	15.452
chr2:24860963-24861377	-1.14	cnn2	1.09	31224	chr2:24861031-24861045	M03841-NR2F2	-	15	0.608	33.5232	15.452
chr2:24860963-24861377	-1.14	cnn2	1.09	31224	chr2:24861034-24861041	M05953-NR2F1	-	8	0.650	33.5232	15.452
chr2:24860963-24861377	-1.14	cnn2	1.09	31224	chr2:24861035-24861041	M03840-NR2F1	-	7	0.798	33.5232	15.452
chr2:24860963-24861377	-1.14	cnn2	1.09	31224	chr2:24861035-24861042	M01984-NR2F6	-	8	0.878	33.5232	15.452
chr2:24860963-24861377	-1.14	cnn2	1.09	31224	chr2:24861035-24861042	M05541-NR2F2	-	8	0.757	33.5232	15.452
chr2:24860963-24861377	-1.14	cnn2	1.09	31224	chr2:24861159-24861166	M05953-NR2F1	-	8	0.904	33.5232	15.452
chr2:24860963-24861377	-1.14	cnn2	1.09	31224	chr2:24861159-24861168	M06478-NR2F2	-	10	0.698	33.5232	15.452
chr2:24860963-24861377	-1.14	cnn2	1.09	31224	chr2:24861160-24861166	M03840-NR2F1	-	7	0.870	33.5232	15.452
chr2:24860963-24861377	-1.14	cnn2	1.09	31224	chr2:24861160-24861167	M01984-NR2F6	-	8	0.960	33.5232	15.452
chr2:24860963-24861377	-1.14	cnn2	1.09	31224	chr2:24861160-24861167	M05541-NR2F2	-	8	0.767	33.5232	15.452
chr2:24860963-24861377	-1.14	cnn2	1.09	31224	chr2:24861160-24861168	M06477-NR2F1	-	9	0.670	33.5232	15.452
chr2:24860963-24861377	-1.14	cnn2	1.09	31224	chr2:24861168-24861185	M06693-NR2F6	-	18	0.633	33.5232	15.452
chr2:24860963-24861377	-1.14	cnn2	1.09	31224	chr2:24861247-24861254	M01984-NR2F6	-	8	0.835	33.5232	15.452
chr2:24860963-24861377	-1.14	cnn2	1.09	31224	chr2:24861343-24861357	M05951-NR2F1	-	15	0.637	33.5232	15.452
chr2:24860963-24861377	-1.14	cnn2	1.09	31224	chr2:24861343-24861357	M09875-NR2F1	-	15	0.793	33.5232	15.452
chr2:24860963-24861377	-1.14	cnn2	1.09	31224	chr2:24861343-24861357	M09877-NR2F1	-	15	0.871	33.5232	15.452
chr2:24860963-24861377	-1.14	cnn2	1.09	31224	chr2:24861343-24861357	M09879-NR2F1	-	15	0.773	33.5232	15.452
chr2:24860963-24861377	-1.14	cnn2	1.09	31224	chr2:24861343-24861357	M09881-NR2F1	-	15	0.854	33.5232	15.452
chr2:24860963-24861377	-1.14	cnn2	1.09	31224	chr2:24861343-24861357	M09883-NR2F6	-	15	0.717	33.5232	15.452
chr2:24860963-24861377	-1.14	cnn2	1.09	31224	chr2:24861343-24861357	M09885-NR2F6	-	15	0.758	33.5232	15.452
chr2:24860963-24861377	-1.14	cnn2	1.09	31224	chr2:24861343-24861357	M09887-NR2F6	-	15	0.802	33.5232	15.452
chr2:24860963-24861377	-1.14	cnn2	1.09	31224	chr2:24861343-24861357	M09889-NR2F6	-	15	0.843	33.5232	15.452
chr2:24860963-24861377	-1.14	cnn2	1.09	31224	chr2:24861344-24861357	M03927-NR2F6	-	14	0.784	33.5232	15.452
chr2:24860963-24861377	-1.14	cnn2	1.09	31224	chr2:24861344-24861357	M05956-NR2F6	-	14	0.670	33.5232	15.452
chr2:24860963-24861377	-1.14	cnn2	1.09	31224	chr2:24861344-24861357	M05957-NR2F6	-	14	0.715	33.5232	15.452
chr2:24860963-24861377	-1.14	cnn2	1.09	31224	chr2:24861347-24861359	M02591-NR2F1	-	13	0.870	33.5232	15.452
chr2:24860963-24861377	-1.14	cnn2	1.09	31224	chr2:24861347-24861359	M05954-NR2F1	-	13	0.870	33.5232	15.452
chr2:24860963-24861377	-1.14	cnn2	1.09	31224	chr2:24861347-24861361	M03841-NR2F2	-	15	0.784	33.5232	15.452
chr2:24860963-24861377	-1.14	cnn2	1.09	31224	chr2:24861350-24861357	M05953-NR2F1	-	8	0.885	33.5232	15.452
chr2:24860963-24861377	-1.14	cnn2	1.09	31224	chr2:24861350-24861359	M06478-NR2F2	-	10	0.880	33.5232	15.452
chr2:24860963-24861377	-1.14	cnn2	1.09	31224	chr2:24861351-24861357	M03840-NR2F1	-	7	1.000	33.5232	15.452
chr2:24860963-24861377	-1.14	cnn2	1.09	31224	chr2:24861351-24861358	M01984-NR2F6	-	8	0.895	33.5232	15.452
chr2:24860963-24861377	-1.14	cnn2	1.09	31224	chr2:24861351-24861358	M05541-NR2F2	-	8	0.764	33.5232	15.452
chr2:24860963-24861377	-1.14	cnn2	1.09	31224	chr2:24861351-24861359	M06477-NR2F1	-	9	0.822	33.5232	15.452
chr2:24860963-24861377	-1.14	cnn2	1.09	31224	chr2:24861351-24861362	M06476-NR2F1	-	12	0.606	33.5232	15.452
chr6:60012450-60012806	-1.14	ccndbp1	6.21	36545	NA	NA	NA	NA	NA	33.5232	15.452
chr9:23081822-23082125	-1.14	tsn	2.23	36715	NA	NA	NA	NA	NA	33.5232	15.452
chr7:57823017-57823415	-1.14	unm_hu7910	-2.17	60778	chr7:57823326-57823332	M03840-NR2F1	-	7	0.609	33.5232	15.452
chr7:57823017-57823415	-1.14	unm_hu7910	-2.17	60778	chr7:57823326-57823333	M05541-NR2F2	-	8	0.630	33.5232	15.452
chr24:41083329-41083633	-1.14	LOC100001114	-9.21	140288	chr24:41083404-41083418	M06479-NR2F2	-	15	0.612	33.5232	15.452
chr7:39173438-39173852	-1.04	tnnt3b	-1.02	4	NA	NA	NA	NA	NA	33.5232	16.5557
chr23:17952554-17953137	-1.04	naca	-1.05	4557	chr23:17952660-17952667	M01984-NR2F6	-	8	0.736	33.5232	16.5557
chr23:17952554-17953137	-1.04	naca	-1.05	4557	chr23:17953019-17953025	M03840-NR2F1	-	7	0.674	33.5232	16.5557
chr21:10689304-10689893	-1.04	grp	6.72	8589	NA	NA	NA	NA	NA	33.5232	16.5557
chr11:38722469-38722935	-1.04	cldn19	-8.51	16447	chr11:38722645-38722652	M05953-NR2F1	-	8	0.650	33.5232	16.5557
chr11:38722469-38722935	-1.04	cldn19	-8.51	16447	chr11:38722646-38722652	M03840-NR2F1	-	7	0.798	33.5232	16.5557
chr11:38722469-38722935	-1.04	cldn19	-8.51	16447	chr11:38722646-38722653	M01984-NR2F6	-	8	0.851	33.5232	16.5557
chr8:14546931-14547281	-1.04	qsox1	5.83	29852	NA	NA	NA	NA	NA	33.5232	16.5557
chr23:17952554-17953137	-1.04	prim1	2.55	29991	chr23:17952660-17952667	M01984-NR2F6	-	8	0.736	33.5232	16.5557
chr23:17952554-17953137	-1.04	prim1	2.55	29991	chr23:17953019-17953025	M03840-NR2F1	-	7	0.674	33.5232	16.5557
chr7:39173438-39173852	-1.04	tnni2b.2	-1.00	51591	NA	NA	NA	NA	NA	33.5232	16.5557
chr12:19242862-19243176	-1.74	tomm22	-1.03	10966	NA	NA	NA	NA	NA	32.6172	9.93341
chr12:19242862-19243176	-1.74	snx29	3.92	43281	NA	NA	NA	NA	NA	32.6172	9.93341
chr25:24951252-24951784	-1.74	tsg101a	2.50	85743	chr25:24951605-24951612	M01984-NR2F6	-	8	0.736	32.6172	9.93341
chr21:21337222-21337714	-1.58	itpkca	7.12	74864	NA	NA	NA	NA	NA	32.6172	11.0371
chr14:28169154-28169626	-1.32	xiap	-2.77	1120	NA	NA	NA	NA	NA	32.6172	13.2446
chr2:18273984-18274536	-1.32	ptprfb	2.43	1194	chr2:18274333-18274340	M05541-NR2F2	-	8	0.730	32.6172	13.2446
chr24:39989350-39989739	-1.32	slc12a7b	-2.51	7952	NA	NA	NA	NA	NA	32.6172	13.2446
chr14:28169154-28169626	-1.32	stag2b	3.62	10613	NA	NA	NA	NA	NA	32.6172	13.2446
chr14:28169154-28169626	-1.32	acsl4a	-1.54	15667	NA	NA	NA	NA	NA	32.6172	13.2446
chr18:26935051-26935393	-1.32	ch25hl1.1	5.97	58457	chr18:26935375-26935382	M05541-NR2F2	-	8	0.688	32.6172	13.2446
chr9:30815027-30815374	-1.21	tbc1d4	4.02	412	chr9:30815205-30815214	M05542-NR2F2	-	10	0.705	32.6172	14.3483
chr9:30815027-30815374	-1.21	tbc1d4	4.02	412	chr9:30815272-30815284	M02591-NR2F1	-	13	0.784	32.6172	14.3483
chr9:30815027-30815374	-1.21	tbc1d4	4.02	412	chr9:30815272-30815284	M05954-NR2F1	-	13	0.784	32.6172	14.3483
chr9:30815027-30815374	-1.21	tbc1d4	4.02	412	chr9:30815272-30815286	M03841-NR2F2	-	15	0.662	32.6172	14.3483
chr9:30815027-30815374	-1.21	tbc1d4	4.02	412	chr9:30815275-30815282	M05953-NR2F1	-	8	0.785	32.6172	14.3483
chr9:30815027-30815374	-1.21	tbc1d4	4.02	412	chr9:30815275-30815284	M06478-NR2F2	-	10	0.858	32.6172	14.3483
chr9:30815027-30815374	-1.21	tbc1d4	4.02	412	chr9:30815276-30815282	M03840-NR2F1	-	7	1.000	32.6172	14.3483
chr9:30815027-30815374	-1.21	tbc1d4	4.02	412	chr9:30815276-30815283	M01984-NR2F6	-	8	0.925	32.6172	14.3483
chr9:30815027-30815374	-1.21	tbc1d4	4.02	412	chr9:30815276-30815283	M05541-NR2F2	-	8	1.000	32.6172	14.3483
chr9:30815027-30815374	-1.21	tbc1d4	4.02	412	chr9:30815276-30815284	M06477-NR2F1	-	9	1.000	32.6172	14.3483
chr9:30815027-30815374	-1.21	tbc1d4	4.02	412	chr9:30815276-30815287	M06476-NR2F1	-	12	0.800	32.6172	14.3483
chr6:19126952-19127290	-1.21	obsl1a	-2.47	679	chr6:19127137-19127144	M05541-NR2F2	-	8	0.744	32.6172	14.3483
chr5:63698957-63699471	-1.21	plpp7	1.59	1344	chr5:63699303-63699312	M06478-NR2F2	-	10	0.614	32.6172	14.3483
chr5:63698957-63699471	-1.21	plpp7	1.59	1344	chr5:63699304-63699311	M05541-NR2F2	-	8	0.738	32.6172	14.3483
chr5:63698957-63699471	-1.21	plpp7	1.59	1344	chr5:63699304-63699317	M03927-NR2F6	-	14	0.683	32.6172	14.3483
chr5:63698957-63699471	-1.21	qsox2	5.83	64997	chr5:63699303-63699312	M06478-NR2F2	-	10	0.614	32.6172	14.3483
chr5:63698957-63699471	-1.21	qsox2	5.83	64997	chr5:63699304-63699311	M05541-NR2F2	-	8	0.738	32.6172	14.3483
chr5:63698957-63699471	-1.21	qsox2	5.83	64997	chr5:63699304-63699317	M03927-NR2F6	-	14	0.683	32.6172	14.3483
chr1:23762448-23762910	-1.21	rps3a	-1.02	93029	NA	NA	NA	NA	NA	32.6172	14.3483
chr1:23762448-23762910	-1.21	lrba	3.90	102457	NA	NA	NA	NA	NA	32.6172	14.3483
chr10:8404568-8405111	-1.10	csgalnact1a	6.26	4116	NA	NA	NA	NA	NA	32.6172	15.452
chr2:8994179-8994688	-1.10	usp33	-1.56	14689	chr2:8994387-8994393	M03840-NR2F1	-	7	0.611	32.6172	15.452
chr2:8994179-8994688	-1.10	usp33	-1.56	14689	chr2:8994628-8994635	M01984-NR2F6	-	8	0.734	32.6172	15.452
chr10:8404568-8405111	-1.10	plpp1a	-1.27	67909	NA	NA	NA	NA	NA	32.6172	15.452
chr19:444407-444731	-1.00	mterf1	-2.83	6427	chr19:444446-444452	M03840-NR2F1	-	7	0.609	32.6172	16.5557
chr19:444407-444731	-1.00	mterf1	-2.83	6427	chr19:444446-444453	M05541-NR2F2	-	8	0.630	32.6172	16.5557
chr19:444407-444731	-1.00	mterf1	-2.83	6427	chr19:444540-444552	M02591-NR2F1	-	13	0.601	32.6172	16.5557
chr19:444407-444731	-1.00	mterf1	-2.83	6427	chr19:444540-444552	M05954-NR2F1	-	13	0.601	32.6172	16.5557
chr19:444407-444731	-1.00	mterf1	-2.83	6427	chr19:444543-444550	M05953-NR2F1	-	8	0.900	32.6172	16.5557
chr19:444407-444731	-1.00	mterf1	-2.83	6427	chr19:444544-444550	M03840-NR2F1	-	7	0.807	32.6172	16.5557
chr19:444407-444731	-1.00	mterf1	-2.83	6427	chr19:444544-444551	M01984-NR2F6	-	8	1.000	32.6172	16.5557
chr19:444407-444731	-1.00	mterf1	-2.83	6427	chr19:444544-444551	M05541-NR2F2	-	8	0.627	32.6172	16.5557
chr19:444407-444731	-1.00	mterf1	-2.83	6427	chr19:444605-444612	M05953-NR2F1	-	8	0.686	32.6172	16.5557
chr19:444407-444731	-1.00	mterf1	-2.83	6427	chr19:444606-444612	M03840-NR2F1	-	7	0.859	32.6172	16.5557
chr19:444407-444731	-1.00	mterf1	-2.83	6427	chr19:444606-444613	M01984-NR2F6	-	8	0.808	32.6172	16.5557
chr19:444407-444731	-1.00	dus3l	-2.03	12621	chr19:444446-444452	M03840-NR2F1	-	7	0.609	32.6172	16.5557
chr19:444407-444731	-1.00	dus3l	-2.03	12621	chr19:444446-444453	M05541-NR2F2	-	8	0.630	32.6172	16.5557
chr19:444407-444731	-1.00	dus3l	-2.03	12621	chr19:444540-444552	M02591-NR2F1	-	13	0.601	32.6172	16.5557
chr19:444407-444731	-1.00	dus3l	-2.03	12621	chr19:444540-444552	M05954-NR2F1	-	13	0.601	32.6172	16.5557
chr19:444407-444731	-1.00	dus3l	-2.03	12621	chr19:444543-444550	M05953-NR2F1	-	8	0.900	32.6172	16.5557
chr19:444407-444731	-1.00	dus3l	-2.03	12621	chr19:444544-444550	M03840-NR2F1	-	7	0.807	32.6172	16.5557
chr19:444407-444731	-1.00	dus3l	-2.03	12621	chr19:444544-444551	M01984-NR2F6	-	8	1.000	32.6172	16.5557
chr19:444407-444731	-1.00	dus3l	-2.03	12621	chr19:444544-444551	M05541-NR2F2	-	8	0.627	32.6172	16.5557
chr19:444407-444731	-1.00	dus3l	-2.03	12621	chr19:444605-444612	M05953-NR2F1	-	8	0.686	32.6172	16.5557
chr19:444407-444731	-1.00	dus3l	-2.03	12621	chr19:444606-444612	M03840-NR2F1	-	7	0.859	32.6172	16.5557
chr19:444407-444731	-1.00	dus3l	-2.03	12621	chr19:444606-444613	M01984-NR2F6	-	8	0.808	32.6172	16.5557
chr7:56610505-56610925	-1.00	myo9aa	4.19	21196	NA	NA	NA	NA	NA	32.6172	16.5557
chr8:23583833-23584361	-1.00	wasb	-2.94	26413	chr8:23584073-23584085	M02591-NR2F1	-	13	0.696	32.6172	16.5557
chr8:23583833-23584361	-1.00	wasb	-2.94	26413	chr8:23584073-23584085	M05954-NR2F1	-	13	0.696	32.6172	16.5557
chr8:23583833-23584361	-1.00	wasb	-2.94	26413	chr8:23584076-23584083	M05953-NR2F1	-	8	0.885	32.6172	16.5557
chr8:23583833-23584361	-1.00	wasb	-2.94	26413	chr8:23584076-23584085	M06478-NR2F2	-	10	0.874	32.6172	16.5557
chr8:23583833-23584361	-1.00	wasb	-2.94	26413	chr8:23584077-23584083	M03840-NR2F1	-	7	1.000	32.6172	16.5557
chr8:23583833-23584361	-1.00	wasb	-2.94	26413	chr8:23584077-23584084	M01984-NR2F6	-	8	0.925	32.6172	16.5557
chr8:23583833-23584361	-1.00	wasb	-2.94	26413	chr8:23584077-23584084	M05541-NR2F2	-	8	1.000	32.6172	16.5557
chr8:23583833-23584361	-1.00	wasb	-2.94	26413	chr8:23584077-23584085	M06477-NR2F1	-	9	0.818	32.6172	16.5557
chr8:23583833-23584361	-1.00	wasb	-2.94	26413	chr8:23584138-23584145	M05953-NR2F1	-	8	0.690	32.6172	16.5557
chr8:23583833-23584361	-1.00	wasb	-2.94	26413	chr8:23584139-23584145	M03840-NR2F1	-	7	0.668	32.6172	16.5557
chr8:23583833-23584361	-1.00	wasb	-2.94	26413	chr8:23584139-23584146	M01984-NR2F6	-	8	0.913	32.6172	16.5557
chr8:23583833-23584361	-1.00	wasb	-2.94	26413	chr8:23584353-23584360	M05541-NR2F2	-	8	0.702	32.6172	16.5557
chr2:48023648-48024031	-1.00	LOC101882560	5.83	48590	chr2:48023845-48023851	M03840-NR2F1	-	7	0.674	32.6172	16.5557
chr8:2627664-2628262	-1.00	zdhhc12a	5.59	83555	chr8:2628101-2628108	M01984-NR2F6	-	8	0.736	32.6172	16.5557
chr8:23583833-23584361	-1.00	fance	4.35	126002	chr8:23584073-23584085	M02591-NR2F1	-	13	0.696	32.6172	16.5557
chr8:23583833-23584361	-1.00	fance	4.35	126002	chr8:23584073-23584085	M05954-NR2F1	-	13	0.696	32.6172	16.5557
chr8:23583833-23584361	-1.00	fance	4.35	126002	chr8:23584076-23584083	M05953-NR2F1	-	8	0.885	32.6172	16.5557
chr8:23583833-23584361	-1.00	fance	4.35	126002	chr8:23584076-23584085	M06478-NR2F2	-	10	0.874	32.6172	16.5557
chr8:23583833-23584361	-1.00	fance	4.35	126002	chr8:23584077-23584083	M03840-NR2F1	-	7	1.000	32.6172	16.5557
chr8:23583833-23584361	-1.00	fance	4.35	126002	chr8:23584077-23584084	M01984-NR2F6	-	8	0.925	32.6172	16.5557
chr8:23583833-23584361	-1.00	fance	4.35	126002	chr8:23584077-23584084	M05541-NR2F2	-	8	1.000	32.6172	16.5557
chr8:23583833-23584361	-1.00	fance	4.35	126002	chr8:23584077-23584085	M06477-NR2F1	-	9	0.818	32.6172	16.5557
chr8:23583833-23584361	-1.00	fance	4.35	126002	chr8:23584138-23584145	M05953-NR2F1	-	8	0.690	32.6172	16.5557
chr8:23583833-23584361	-1.00	fance	4.35	126002	chr8:23584139-23584145	M03840-NR2F1	-	7	0.668	32.6172	16.5557
chr8:23583833-23584361	-1.00	fance	4.35	126002	chr8:23584139-23584146	M01984-NR2F6	-	8	0.913	32.6172	16.5557
chr8:23583833-23584361	-1.00	fance	4.35	126002	chr8:23584353-23584360	M05541-NR2F2	-	8	0.702	32.6172	16.5557
chr8:23583833-23584361	-1.00	rpl10a	-1.04	132540	chr8:23584073-23584085	M02591-NR2F1	-	13	0.696	32.6172	16.5557
chr8:23583833-23584361	-1.00	rpl10a	-1.04	132540	chr8:23584073-23584085	M05954-NR2F1	-	13	0.696	32.6172	16.5557
chr8:23583833-23584361	-1.00	rpl10a	-1.04	132540	chr8:23584076-23584083	M05953-NR2F1	-	8	0.885	32.6172	16.5557
chr8:23583833-23584361	-1.00	rpl10a	-1.04	132540	chr8:23584076-23584085	M06478-NR2F2	-	10	0.874	32.6172	16.5557
chr8:23583833-23584361	-1.00	rpl10a	-1.04	132540	chr8:23584077-23584083	M03840-NR2F1	-	7	1.000	32.6172	16.5557
chr8:23583833-23584361	-1.00	rpl10a	-1.04	132540	chr8:23584077-23584084	M01984-NR2F6	-	8	0.925	32.6172	16.5557
chr8:23583833-23584361	-1.00	rpl10a	-1.04	132540	chr8:23584077-23584084	M05541-NR2F2	-	8	1.000	32.6172	16.5557
chr8:23583833-23584361	-1.00	rpl10a	-1.04	132540	chr8:23584077-23584085	M06477-NR2F1	-	9	0.818	32.6172	16.5557
chr8:23583833-23584361	-1.00	rpl10a	-1.04	132540	chr8:23584138-23584145	M05953-NR2F1	-	8	0.690	32.6172	16.5557
chr8:23583833-23584361	-1.00	rpl10a	-1.04	132540	chr8:23584139-23584145	M03840-NR2F1	-	7	0.668	32.6172	16.5557
chr8:23583833-23584361	-1.00	rpl10a	-1.04	132540	chr8:23584139-23584146	M01984-NR2F6	-	8	0.913	32.6172	16.5557
chr8:23583833-23584361	-1.00	rpl10a	-1.04	132540	chr8:23584353-23584360	M05541-NR2F2	-	8	0.702	32.6172	16.5557
chr8:23583833-23584361	-1.00	srpk1a	-2.61	255825	chr8:23584073-23584085	M02591-NR2F1	-	13	0.696	32.6172	16.5557
chr8:23583833-23584361	-1.00	srpk1a	-2.61	255825	chr8:23584073-23584085	M05954-NR2F1	-	13	0.696	32.6172	16.5557
chr8:23583833-23584361	-1.00	srpk1a	-2.61	255825	chr8:23584076-23584083	M05953-NR2F1	-	8	0.885	32.6172	16.5557
chr8:23583833-23584361	-1.00	srpk1a	-2.61	255825	chr8:23584076-23584085	M06478-NR2F2	-	10	0.874	32.6172	16.5557
chr8:23583833-23584361	-1.00	srpk1a	-2.61	255825	chr8:23584077-23584083	M03840-NR2F1	-	7	1.000	32.6172	16.5557
chr8:23583833-23584361	-1.00	srpk1a	-2.61	255825	chr8:23584077-23584084	M01984-NR2F6	-	8	0.925	32.6172	16.5557
chr8:23583833-23584361	-1.00	srpk1a	-2.61	255825	chr8:23584077-23584084	M05541-NR2F2	-	8	1.000	32.6172	16.5557
chr8:23583833-23584361	-1.00	srpk1a	-2.61	255825	chr8:23584077-23584085	M06477-NR2F1	-	9	0.818	32.6172	16.5557
chr8:23583833-23584361	-1.00	srpk1a	-2.61	255825	chr8:23584138-23584145	M05953-NR2F1	-	8	0.690	32.6172	16.5557
chr8:23583833-23584361	-1.00	srpk1a	-2.61	255825	chr8:23584139-23584145	M03840-NR2F1	-	7	0.668	32.6172	16.5557
chr8:23583833-23584361	-1.00	srpk1a	-2.61	255825	chr8:23584139-23584146	M01984-NR2F6	-	8	0.913	32.6172	16.5557
chr8:23583833-23584361	-1.00	srpk1a	-2.61	255825	chr8:23584353-23584360	M05541-NR2F2	-	8	0.702	32.6172	16.5557
chr15:20350450-20351042	1.09	il15l	4.15	65347	chr15:20350501-20350510	M06478-NR2F2	-	10	0.602	31.7111	68.4302
chr15:20350450-20351042	1.09	il15l	4.15	65347	chr15:20350502-20350509	M01984-NR2F6	-	8	0.840	31.7111	68.4302
chr15:20350450-20351042	1.09	il15l	4.15	65347	chr15:20350502-20350510	M06477-NR2F1	-	9	0.606	31.7111	68.4302
chr15:20350450-20351042	1.09	il15l	4.15	65347	chr15:20350916-20350930	M03841-NR2F2	-	15	0.641	31.7111	68.4302
chr15:20350450-20351042	1.09	il15l	4.15	65347	chr15:20350919-20350928	M06478-NR2F2	-	10	0.612	31.7111	68.4302
chr15:20350450-20351042	1.09	il15l	4.15	65347	chr15:20350920-20350927	M05541-NR2F2	-	8	0.604	31.7111	68.4302
chr15:20350450-20351042	1.09	il15l	4.15	65347	chr15:20350946-20350955	M05542-NR2F2	-	10	0.831	31.7111	68.4302
chr15:20350450-20351042	1.09	il15l	4.15	65347	chr15:20350985-20350998	M03927-NR2F6	-	14	0.764	31.7111	68.4302
chr15:20350450-20351042	1.09	chp2	2.68	119369	chr15:20350501-20350510	M06478-NR2F2	-	10	0.602	31.7111	68.4302
chr15:20350450-20351042	1.09	chp2	2.68	119369	chr15:20350502-20350509	M01984-NR2F6	-	8	0.840	31.7111	68.4302
chr15:20350450-20351042	1.09	chp2	2.68	119369	chr15:20350502-20350510	M06477-NR2F1	-	9	0.606	31.7111	68.4302
chr15:20350450-20351042	1.09	chp2	2.68	119369	chr15:20350916-20350930	M03841-NR2F2	-	15	0.641	31.7111	68.4302
chr15:20350450-20351042	1.09	chp2	2.68	119369	chr15:20350919-20350928	M06478-NR2F2	-	10	0.612	31.7111	68.4302
chr15:20350450-20351042	1.09	chp2	2.68	119369	chr15:20350920-20350927	M05541-NR2F2	-	8	0.604	31.7111	68.4302
chr15:20350450-20351042	1.09	chp2	2.68	119369	chr15:20350946-20350955	M05542-NR2F2	-	10	0.831	31.7111	68.4302
chr15:20350450-20351042	1.09	chp2	2.68	119369	chr15:20350985-20350998	M03927-NR2F6	-	14	0.764	31.7111	68.4302
chr18:31248340-31248854	-1.87	tcf25	2.08	19837	NA	NA	NA	NA	NA	31.7111	8.8297
chr14:23014437-23015120	-1.87	enox2	3.39	36379	chr14:23015091-23015098	M05541-NR2F2	-	8	0.688	31.7111	8.8297
chr6:29228669-29228892	-1.54	atp1b1a	-1.19	1559	NA	NA	NA	NA	NA	31.7111	11.0371
chr7:32258009-32258554	-1.41	arl14ep	4.27	94980	chr7:32258291-32258298	M05953-NR2F1	-	8	0.798	31.7111	12.1408
chr7:32258009-32258554	-1.41	arl14ep	4.27	94980	chr7:32258292-32258298	M03840-NR2F1	-	7	1.000	31.7111	12.1408
chr7:32258009-32258554	-1.41	arl14ep	4.27	94980	chr7:32258292-32258299	M01984-NR2F6	-	8	0.916	31.7111	12.1408
chr7:32258009-32258554	-1.41	arl14ep	4.27	94980	chr7:32258292-32258299	M05541-NR2F2	-	8	0.815	31.7111	12.1408
chr7:32258009-32258554	-1.41	arl14ep	4.27	94980	chr7:32258292-32258300	M06477-NR2F1	-	9	0.628	31.7111	12.1408
chr13:29893538-29894059	-1.28	scdb	4.17	0	chr13:29893777-29893783	M03840-NR2F1	-	7	0.636	31.7111	13.2446
chr13:29893538-29894059	-1.28	scdb	4.17	0	chr13:29893777-29893784	M05541-NR2F2	-	8	0.608	31.7111	13.2446
chr13:29893538-29894059	-1.28	scdb	4.17	0	chr13:29893876-29893883	M05953-NR2F1	-	8	0.817	31.7111	13.2446
chr13:29893538-29894059	-1.28	scdb	4.17	0	chr13:29893877-29893883	M03840-NR2F1	-	7	0.870	31.7111	13.2446
chr13:29893538-29894059	-1.28	scdb	4.17	0	chr13:29893877-29893884	M01984-NR2F6	-	8	0.951	31.7111	13.2446
chr1:46886078-46886542	-1.28	sh3pxd2aa	3.49	7927	chr1:46886454-46886467	M03927-NR2F6	-	14	0.654	31.7111	13.2446
chr13:29893538-29894059	-1.28	dnajb12a	1.64	10898	chr13:29893777-29893783	M03840-NR2F1	-	7	0.636	31.7111	13.2446
chr13:29893538-29894059	-1.28	dnajb12a	1.64	10898	chr13:29893777-29893784	M05541-NR2F2	-	8	0.608	31.7111	13.2446
chr13:29893538-29894059	-1.28	dnajb12a	1.64	10898	chr13:29893876-29893883	M05953-NR2F1	-	8	0.817	31.7111	13.2446
chr13:29893538-29894059	-1.28	dnajb12a	1.64	10898	chr13:29893877-29893883	M03840-NR2F1	-	7	0.870	31.7111	13.2446
chr13:29893538-29894059	-1.28	dnajb12a	1.64	10898	chr13:29893877-29893884	M01984-NR2F6	-	8	0.951	31.7111	13.2446
chr4:11999769-12000143	-1.28	tnnt2c	-1.04	32981	chr4:11999982-11999996	M06479-NR2F2	-	15	0.655	31.7111	13.2446
chr17:53223296-53223530	-1.28	nek9	-2.02	61664	NA	NA	NA	NA	NA	31.7111	13.2446
chr4:11999769-12000143	-1.28	braf	3.23	73429	chr4:11999982-11999996	M06479-NR2F2	-	15	0.655	31.7111	13.2446
chr17:37504794-37505335	-1.17	crip2	-1.31	0	chr17:37505244-37505250	M03840-NR2F1	-	7	0.672	31.7111	14.3483
chr15:8414834-8415166	-1.17	tmem160	6.09	3601	NA	NA	NA	NA	NA	31.7111	14.3483
chr7:46047873-46048338	-1.17	znf536	5.18	19225	chr7:46048078-46048084	M03840-NR2F1	-	7	0.611	31.7111	14.3483
chr17:37504794-37505335	-1.17	crip1	-1.02	56888	chr17:37505244-37505250	M03840-NR2F1	-	7	0.672	31.7111	14.3483
chr17:37504794-37505335	-1.17	tmem62	5.83	170650	chr17:37505244-37505250	M03840-NR2F1	-	7	0.672	31.7111	14.3483
chr16:11305241-11305559	-1.06	cicb	4.21	0	NA	NA	NA	NA	NA	31.7111	15.452
chr9:21414709-21415223	-1.06	cox17	-1.09	9597	NA	NA	NA	NA	NA	31.7111	15.452
chr3:23143899-23144276	-1.06	ppp1r9ba	2.52	22533	NA	NA	NA	NA	NA	31.7111	15.452
chr16:25801481-25801962	-1.06	tomm40	-1.33	35816	NA	NA	NA	NA	NA	31.7111	15.452
chr16:25801481-25801962	-1.06	nsmce2	-1.95	43398	NA	NA	NA	NA	NA	31.7111	15.452
chr9:21414709-21415223	-1.06	hao2	5.90	60960	NA	NA	NA	NA	NA	31.7111	15.452
chr24:16779255-16780380	1.33	cmbl	-1.06	6585	chr24:16779277-16779284	M05953-NR2F1	-	8	0.894	30.8051	78.3636
chr24:16779255-16780380	1.33	cmbl	-1.06	6585	chr24:16779278-16779284	M03840-NR2F1	-	7	0.937	30.8051	78.3636
chr24:16779255-16780380	1.33	cmbl	-1.06	6585	chr24:16779278-16779285	M01984-NR2F6	-	8	0.935	30.8051	78.3636
chr24:16779255-16780380	1.33	cmbl	-1.06	6585	chr24:16779278-16779285	M05541-NR2F2	-	8	0.624	30.8051	78.3636
chr24:16779255-16780380	1.33	cmbl	-1.06	6585	chr24:16780343-16780350	M01984-NR2F6	-	8	0.791	30.8051	78.3636
chr24:16779255-16780380	1.33	sema5a	3.97	216736	chr24:16779277-16779284	M05953-NR2F1	-	8	0.894	30.8051	78.3636
chr24:16779255-16780380	1.33	sema5a	3.97	216736	chr24:16779278-16779284	M03840-NR2F1	-	7	0.937	30.8051	78.3636
chr24:16779255-16780380	1.33	sema5a	3.97	216736	chr24:16779278-16779285	M01984-NR2F6	-	8	0.935	30.8051	78.3636
chr24:16779255-16780380	1.33	sema5a	3.97	216736	chr24:16779278-16779285	M05541-NR2F2	-	8	0.624	30.8051	78.3636
chr24:16779255-16780380	1.33	sema5a	3.97	216736	chr24:16780343-16780350	M01984-NR2F6	-	8	0.791	30.8051	78.3636
chr2:59012844-59013937	1.13	LOC101885256	5.51	0	chr2:59013357-59013370	M03927-NR2F6	-	14	0.644	30.8051	68.4302
chr2:59012844-59013937	1.13	LOC101885256	5.51	0	chr2:59013670-59013676	M03840-NR2F1	-	7	0.636	30.8051	68.4302
chr2:59012844-59013937	1.13	LOC101885256	5.51	0	chr2:59013670-59013677	M05541-NR2F2	-	8	0.793	30.8051	68.4302
chr19:46599968-46600286	-1.65	vps28	-2.23	31722	chr19:46600089-46600095	M03840-NR2F1	-	7	0.672	30.8051	9.93341
chr19:46599968-46600286	-1.65	vps28	-2.23	31722	chr19:46600096-46600105	M05542-NR2F2	-	10	0.702	30.8051	9.93341
chr23:25890810-25891595	-1.50	fitm2	4.06	19253	chr23:25890895-25890901	M03840-NR2F1	-	7	0.672	30.8051	11.0371
chr23:25890810-25891595	-1.50	fitm2	4.06	19253	chr23:25890895-25890902	M05541-NR2F2	-	8	0.770	30.8051	11.0371
chr23:25890810-25891595	-1.50	fitm2	4.06	19253	chr23:25891509-25891518	M06478-NR2F2	-	10	0.724	30.8051	11.0371
chr23:25890810-25891595	-1.50	fitm2	4.06	19253	chr23:25891509-25891523	M09875-NR2F1	-	15	0.667	30.8051	11.0371
chr23:25890810-25891595	-1.50	fitm2	4.06	19253	chr23:25891509-25891523	M09877-NR2F1	-	15	0.680	30.8051	11.0371
chr23:25890810-25891595	-1.50	fitm2	4.06	19253	chr23:25891509-25891523	M09881-NR2F1	-	15	0.632	30.8051	11.0371
chr23:25890810-25891595	-1.50	fitm2	4.06	19253	chr23:25891509-25891523	M09887-NR2F6	-	15	0.666	30.8051	11.0371
chr23:25890810-25891595	-1.50	fitm2	4.06	19253	chr23:25891509-25891523	M09889-NR2F6	-	15	0.719	30.8051	11.0371
chr23:25890810-25891595	-1.50	fitm2	4.06	19253	chr23:25891510-25891518	M06477-NR2F1	-	9	0.751	30.8051	11.0371
chr23:25890810-25891595	-1.50	fitm2	4.06	19253	chr23:25891510-25891521	M06476-NR2F1	-	12	0.851	30.8051	11.0371
chr23:25890810-25891595	-1.50	fitm2	4.06	19253	chr23:25891510-25891523	M05957-NR2F6	-	14	0.644	30.8051	11.0371
chr23:25890810-25891595	-1.50	fitm2	4.06	19253	chr23:25891516-25891523	M05953-NR2F1	-	8	0.904	30.8051	11.0371
chr23:25890810-25891595	-1.50	fitm2	4.06	19253	chr23:25891516-25891525	M06478-NR2F2	-	10	0.633	30.8051	11.0371
chr23:25890810-25891595	-1.50	fitm2	4.06	19253	chr23:25891517-25891523	M03840-NR2F1	-	7	0.870	30.8051	11.0371
chr23:25890810-25891595	-1.50	fitm2	4.06	19253	chr23:25891517-25891524	M01984-NR2F6	-	8	0.930	30.8051	11.0371
chr1:53020518-53020749	-1.36	pus10	3.92	61340	NA	NA	NA	NA	NA	30.8051	12.1408
chr10:4882634-4882912	-1.36	lyrm7	-1.10	81299	chr10:4882807-4882813	M03840-NR2F1	-	7	0.611	30.8051	12.1408
chr10:4882634-4882912	-1.36	mat2al	7.48	86418	chr10:4882807-4882813	M03840-NR2F1	-	7	0.611	30.8051	12.1408
chr22:12246623-12247040	-1.24	zranb3	5.68	0	chr22:12246738-12246745	M05953-NR2F1	-	8	0.650	30.8051	13.2446
chr22:12246623-12247040	-1.24	zranb3	5.68	0	chr22:12246739-12246745	M03840-NR2F1	-	7	0.798	30.8051	13.2446
chr22:12246623-12247040	-1.24	zranb3	5.68	0	chr22:12246739-12246746	M01984-NR2F6	-	8	0.851	30.8051	13.2446
chr23:9861256-9861930	-1.24	prkcbp1l	2.39	12734	NA	NA	NA	NA	NA	30.8051	13.2446
chr3:47307685-47308078	-1.24	usp31	-4.71	13084	NA	NA	NA	NA	NA	30.8051	13.2446
chr3:47307685-47308078	-1.24	il21r.1	-4.14	83367	NA	NA	NA	NA	NA	30.8051	13.2446
chr6:13766569-13766980	-1.12	dnpep	2.05	0	chr6:13766617-13766626	M06478-NR2F2	-	10	0.604	30.8051	14.3483
chr6:13766569-13766980	-1.12	dnpep	2.05	0	chr6:13766618-13766624	M03840-NR2F1	-	7	0.611	30.8051	14.3483
chr6:13766569-13766980	-1.12	dnpep	2.05	0	chr6:13766618-13766625	M05541-NR2F2	-	8	0.616	30.8051	14.3483
chr12:22649961-22650275	-1.12	ablim2	-1.20	2632	chr12:22650002-22650008	M03840-NR2F1	-	7	0.674	30.8051	14.3483
chr21:9428166-9428513	-1.12	ptpn13	6.83	4987	NA	NA	NA	NA	NA	30.8051	14.3483
chr1:42974900-42975237	-1.12	cisd2	3.61	9886	NA	NA	NA	NA	NA	30.8051	14.3483
chr21:26442886-26443133	-1.12	rce1b	4.56	12301	NA	NA	NA	NA	NA	30.8051	14.3483
chr20:23609380-23609975	-1.12	anapc4	6.31	13767	chr20:23609390-23609397	M05541-NR2F2	-	8	0.740	30.8051	14.3483
chr20:23609380-23609975	-1.12	anapc4	6.31	13767	chr20:23609748-23609755	M05953-NR2F1	-	8	0.650	30.8051	14.3483
chr20:23609380-23609975	-1.12	anapc4	6.31	13767	chr20:23609749-23609755	M03840-NR2F1	-	7	0.798	30.8051	14.3483
chr20:23609380-23609975	-1.12	anapc4	6.31	13767	chr20:23609749-23609756	M01984-NR2F6	-	8	0.851	30.8051	14.3483
chr7:56604638-56604968	-1.12	myo9aa	4.19	15329	chr7:56604722-56604731	M05542-NR2F2	-	10	0.626	30.8051	14.3483
chr22:15667407-15667942	-1.12	mrpl54	-1.23	25128	chr22:15667439-15667445	M03840-NR2F1	-	7	0.672	30.8051	14.3483
chr22:15667407-15667942	-1.12	mrpl54	-1.23	25128	chr22:15667725-15667731	M03840-NR2F1	-	7	0.636	30.8051	14.3483
chr20:23609380-23609975	-1.12	slain2	-1.69	36115	chr20:23609390-23609397	M05541-NR2F2	-	8	0.740	30.8051	14.3483
chr20:23609380-23609975	-1.12	slain2	-1.69	36115	chr20:23609748-23609755	M05953-NR2F1	-	8	0.650	30.8051	14.3483
chr20:23609380-23609975	-1.12	slain2	-1.69	36115	chr20:23609749-23609755	M03840-NR2F1	-	7	0.798	30.8051	14.3483
chr20:23609380-23609975	-1.12	slain2	-1.69	36115	chr20:23609749-23609756	M01984-NR2F6	-	8	0.851	30.8051	14.3483
chr21:26442886-26443133	-1.12	adssl	8.72	42810	NA	NA	NA	NA	NA	30.8051	14.3483
chr21:9428166-9428513	-1.12	mapk10	5.97	54505	NA	NA	NA	NA	NA	30.8051	14.3483
chr21:26442886-26443133	-1.12	tmsb	-1.05	87538	NA	NA	NA	NA	NA	30.8051	14.3483
chr12:22649961-22650275	-1.12	zcchc4	4.42	100902	chr12:22650002-22650008	M03840-NR2F1	-	7	0.674	30.8051	14.3483
chr6:13766569-13766980	-1.12	etv5b	1.72	135602	chr6:13766617-13766626	M06478-NR2F2	-	10	0.604	30.8051	14.3483
chr6:13766569-13766980	-1.12	etv5b	1.72	135602	chr6:13766618-13766624	M03840-NR2F1	-	7	0.611	30.8051	14.3483
chr6:13766569-13766980	-1.12	etv5b	1.72	135602	chr6:13766618-13766625	M05541-NR2F2	-	8	0.616	30.8051	14.3483
chr6:13766569-13766980	-1.12	cacnb4b	6.46	189914	chr6:13766617-13766626	M06478-NR2F2	-	10	0.604	30.8051	14.3483
chr6:13766569-13766980	-1.12	cacnb4b	6.46	189914	chr6:13766618-13766624	M03840-NR2F1	-	7	0.611	30.8051	14.3483
chr6:13766569-13766980	-1.12	cacnb4b	6.46	189914	chr6:13766618-13766625	M05541-NR2F2	-	8	0.616	30.8051	14.3483
chr6:35486605-35487086	-1.02	rgs8	5.59	2204	NA	NA	NA	NA	NA	30.8051	15.452
chr7:56149215-56149527	-1.02	slc22a31	-1.35	2676	NA	NA	NA	NA	NA	30.8051	15.452
chr4:22204724-22205113	-1.02	acss3	5.97	7838	chr4:22204996-22205003	M05953-NR2F1	-	8	0.682	30.8051	15.452
chr4:22204724-22205113	-1.02	acss3	5.97	7838	chr4:22204997-22205003	M03840-NR2F1	-	7	0.668	30.8051	15.452
chr4:22204724-22205113	-1.02	acss3	5.97	7838	chr4:22204997-22205004	M01984-NR2F6	-	8	0.883	30.8051	15.452
chr17:12525038-12525399	-1.02	stmn4l	6.68	19044	NA	NA	NA	NA	NA	30.8051	15.452
chr12:61466-62074	-1.02	map2k4b	5.97	21188	chr12:61619-61626	M05953-NR2F1	-	8	0.690	30.8051	15.452
chr12:61466-62074	-1.02	map2k4b	5.97	21188	chr12:61620-61626	M03840-NR2F1	-	7	0.668	30.8051	15.452
chr12:61466-62074	-1.02	map2k4b	5.97	21188	chr12:61620-61627	M01984-NR2F6	-	8	0.886	30.8051	15.452
chr7:56149215-56149527	-1.02	ist1	1.44	21624	NA	NA	NA	NA	NA	30.8051	15.452
chr9:3134407-3134899	-1.02	dync1i2a	-1.11	29182	chr9:3134430-3134437	M05541-NR2F2	-	8	0.744	30.8051	15.452
chr9:3134407-3134899	-1.02	dync1i2a	-1.11	29182	chr9:3134430-3134441	M06476-NR2F1	-	12	0.635	30.8051	15.452
chr9:3134407-3134899	-1.02	dync1i2a	-1.11	29182	chr9:3134448-3134455	M05953-NR2F1	-	8	0.669	30.8051	15.452
chr9:3134407-3134899	-1.02	dync1i2a	-1.11	29182	chr9:3134449-3134455	M03840-NR2F1	-	7	0.668	30.8051	15.452
chr9:3134407-3134899	-1.02	dync1i2a	-1.11	29182	chr9:3134449-3134456	M01984-NR2F6	-	8	0.883	30.8051	15.452
chr9:3134407-3134899	-1.02	dync1i2a	-1.11	29182	chr9:3134506-3134513	M05541-NR2F2	-	8	0.744	30.8051	15.452
chr9:3134407-3134899	-1.02	dync1i2a	-1.11	29182	chr9:3134741-3134748	M05541-NR2F2	-	8	0.688	30.8051	15.452
chr9:3134407-3134899	-1.02	dync1i2a	-1.11	29182	chr9:3134857-3134864	M05953-NR2F1	-	8	0.885	30.8051	15.452
chr9:3134407-3134899	-1.02	dync1i2a	-1.11	29182	chr9:3134857-3134866	M06478-NR2F2	-	10	0.675	30.8051	15.452
chr9:3134407-3134899	-1.02	dync1i2a	-1.11	29182	chr9:3134858-3134864	M03840-NR2F1	-	7	1.000	30.8051	15.452
chr9:3134407-3134899	-1.02	dync1i2a	-1.11	29182	chr9:3134858-3134865	M01984-NR2F6	-	8	0.916	30.8051	15.452
chr9:3134407-3134899	-1.02	dync1i2a	-1.11	29182	chr9:3134858-3134865	M05541-NR2F2	-	8	0.815	30.8051	15.452
chr9:3134407-3134899	-1.02	dync1i2a	-1.11	29182	chr9:3134858-3134866	M06477-NR2F1	-	9	0.628	30.8051	15.452
chr9:3134407-3134899	-1.02	dync1i2a	-1.11	29182	chr9:3134430-3134437	M05541-NR2F2	-	8	0.744	30.8051	15.452
chr9:3134407-3134899	-1.02	dync1i2a	-1.11	29182	chr9:3134430-3134441	M06476-NR2F1	-	12	0.635	30.8051	15.452
chr9:3134407-3134899	-1.02	dync1i2a	-1.11	29182	chr9:3134448-3134455	M05953-NR2F1	-	8	0.669	30.8051	15.452
chr9:3134407-3134899	-1.02	dync1i2a	-1.11	29182	chr9:3134449-3134455	M03840-NR2F1	-	7	0.668	30.8051	15.452
chr9:3134407-3134899	-1.02	dync1i2a	-1.11	29182	chr9:3134449-3134456	M01984-NR2F6	-	8	0.883	30.8051	15.452
chr9:3134407-3134899	-1.02	dync1i2a	-1.11	29182	chr9:3134506-3134513	M05541-NR2F2	-	8	0.744	30.8051	15.452
chr9:3134407-3134899	-1.02	dync1i2a	-1.11	29182	chr9:3134741-3134748	M05541-NR2F2	-	8	0.688	30.8051	15.452
chr9:3134407-3134899	-1.02	dync1i2a	-1.11	29182	chr9:3134857-3134864	M05953-NR2F1	-	8	0.885	30.8051	15.452
chr9:3134407-3134899	-1.02	dync1i2a	-1.11	29182	chr9:3134857-3134866	M06478-NR2F2	-	10	0.675	30.8051	15.452
chr9:3134407-3134899	-1.02	dync1i2a	-1.11	29182	chr9:3134858-3134864	M03840-NR2F1	-	7	1.000	30.8051	15.452
chr9:3134407-3134899	-1.02	dync1i2a	-1.11	29182	chr9:3134858-3134865	M01984-NR2F6	-	8	0.916	30.8051	15.452
chr9:3134407-3134899	-1.02	dync1i2a	-1.11	29182	chr9:3134858-3134865	M05541-NR2F2	-	8	0.815	30.8051	15.452
chr9:3134407-3134899	-1.02	dync1i2a	-1.11	29182	chr9:3134858-3134866	M06477-NR2F1	-	9	0.628	30.8051	15.452
chr12:26905703-26906163	-1.02	znf438	5.51	29584	chr12:26905889-26905895	M03840-NR2F1	-	7	0.611	30.8051	15.452
chr12:26905703-26906163	-1.02	znf438	5.51	29584	chr12:26905889-26905896	M05541-NR2F2	-	8	0.616	30.8051	15.452
chr7:56149215-56149527	-1.02	ankrd11	1.42	40616	NA	NA	NA	NA	NA	30.8051	15.452
chr5:12469581-12469875	-1.02	pes	-1.44	104409	chr5:12469742-12469756	M09889-NR2F6	-	15	0.632	30.8051	15.452
chr5:12469581-12469875	-1.02	p2rx2	6.03	145923	chr5:12469742-12469756	M09889-NR2F6	-	15	0.632	30.8051	15.452
chr1:24486102-24486502	-2.20	arfip1	4.05	263720	chr1:24486391-24486398	M05953-NR2F1	-	8	0.650	29.8991	6.62228
chr1:24486102-24486502	-2.20	arfip1	4.05	263720	chr1:24486392-24486398	M03840-NR2F1	-	7	0.798	29.8991	6.62228
chr1:24486102-24486502	-2.20	arfip1	4.05	263720	chr1:24486392-24486399	M01984-NR2F6	-	8	0.848	29.8991	6.62228
chr1:1620970-1621469	-1.97	atp1a1a.2	6.09	20094	NA	NA	NA	NA	NA	29.8991	7.72599
chr13:30828421-30829026	-1.78	drgx	6.76	40562	NA	NA	NA	NA	NA	29.8991	8.8297
chr23:25988247-25988622	-1.78	gdi1	4.52	148435	chr23:25988425-25988432	M05541-NR2F2	-	8	0.738	29.8991	8.8297
chr13:9100243-9100690	-1.61	pomk	-4.11	116185	NA	NA	NA	NA	NA	29.8991	9.93341
chr16:32381346-32381679	-1.46	mms22l	7.15	30544	NA	NA	NA	NA	NA	29.8991	11.0371
chr16:32381346-32381679	-1.46	klhl32	-1.90	59347	NA	NA	NA	NA	NA	29.8991	11.0371
chr7:33765693-33766211	-1.32	map2k5	5.97	2461	chr7:33765870-33765887	M06693-NR2F6	-	18	0.604	29.8991	12.1408
chr7:33765693-33766211	-1.32	map2k5	5.97	2461	chr7:33765871-33765883	M02591-NR2F1	-	13	0.829	29.8991	12.1408
chr7:33765693-33766211	-1.32	map2k5	5.97	2461	chr7:33765871-33765883	M05954-NR2F1	-	13	0.829	29.8991	12.1408
chr7:33765693-33766211	-1.32	map2k5	5.97	2461	chr7:33765871-33765885	M03841-NR2F2	-	15	0.879	29.8991	12.1408
chr7:33765693-33766211	-1.32	map2k5	5.97	2461	chr7:33765874-33765881	M05953-NR2F1	-	8	0.981	29.8991	12.1408
chr7:33765693-33766211	-1.32	map2k5	5.97	2461	chr7:33765874-33765883	M06478-NR2F2	-	10	0.932	29.8991	12.1408
chr7:33765693-33766211	-1.32	map2k5	5.97	2461	chr7:33765874-33765888	M05951-NR2F1	-	15	0.842	29.8991	12.1408
chr7:33765693-33766211	-1.32	map2k5	5.97	2461	chr7:33765874-33765888	M09875-NR2F1	-	15	0.880	29.8991	12.1408
chr7:33765693-33766211	-1.32	map2k5	5.97	2461	chr7:33765874-33765888	M09877-NR2F1	-	15	0.862	29.8991	12.1408
chr7:33765693-33766211	-1.32	map2k5	5.97	2461	chr7:33765874-33765888	M09879-NR2F1	-	15	0.833	29.8991	12.1408
chr7:33765693-33766211	-1.32	map2k5	5.97	2461	chr7:33765874-33765888	M09881-NR2F1	-	15	0.847	29.8991	12.1408
chr7:33765693-33766211	-1.32	map2k5	5.97	2461	chr7:33765874-33765888	M09883-NR2F6	-	15	0.741	29.8991	12.1408
chr7:33765693-33766211	-1.32	map2k5	5.97	2461	chr7:33765874-33765888	M09885-NR2F6	-	15	0.734	29.8991	12.1408
chr7:33765693-33766211	-1.32	map2k5	5.97	2461	chr7:33765874-33765888	M09887-NR2F6	-	15	0.875	29.8991	12.1408
chr7:33765693-33766211	-1.32	map2k5	5.97	2461	chr7:33765874-33765888	M09889-NR2F6	-	15	0.883	29.8991	12.1408
chr7:33765693-33766211	-1.32	map2k5	5.97	2461	chr7:33765875-33765881	M03840-NR2F1	-	7	0.937	29.8991	12.1408
chr7:33765693-33766211	-1.32	map2k5	5.97	2461	chr7:33765875-33765882	M01984-NR2F6	-	8	0.965	29.8991	12.1408
chr7:33765693-33766211	-1.32	map2k5	5.97	2461	chr7:33765875-33765882	M05541-NR2F2	-	8	0.860	29.8991	12.1408
chr7:33765693-33766211	-1.32	map2k5	5.97	2461	chr7:33765875-33765883	M06477-NR2F1	-	9	0.891	29.8991	12.1408
chr7:33765693-33766211	-1.32	map2k5	5.97	2461	chr7:33765875-33765886	M06476-NR2F1	-	12	0.930	29.8991	12.1408
chr7:33765693-33766211	-1.32	map2k5	5.97	2461	chr7:33765875-33765888	M03927-NR2F6	-	14	0.781	29.8991	12.1408
chr7:33765693-33766211	-1.32	map2k5	5.97	2461	chr7:33765875-33765888	M05956-NR2F6	-	14	0.759	29.8991	12.1408
chr7:33765693-33766211	-1.32	map2k5	5.97	2461	chr7:33765875-33765888	M05957-NR2F6	-	14	0.838	29.8991	12.1408
chr7:33765693-33766211	-1.32	map2k5	5.97	2461	chr7:33765878-33765890	M02591-NR2F1	-	13	0.601	29.8991	12.1408
chr7:33765693-33766211	-1.32	map2k5	5.97	2461	chr7:33765878-33765890	M05954-NR2F1	-	13	0.601	29.8991	12.1408
chr7:33765693-33766211	-1.32	map2k5	5.97	2461	chr7:33765881-33765888	M05953-NR2F1	-	8	0.825	29.8991	12.1408
chr7:33765693-33766211	-1.32	map2k5	5.97	2461	chr7:33765882-33765888	M03840-NR2F1	-	7	0.870	29.8991	12.1408
chr7:33765693-33766211	-1.32	map2k5	5.97	2461	chr7:33765882-33765889	M01984-NR2F6	-	8	0.951	29.8991	12.1408
chr7:33765693-33766211	-1.32	map2k5	5.97	2461	chr7:33765965-33765972	M05953-NR2F1	-	8	0.921	29.8991	12.1408
chr7:33765693-33766211	-1.32	map2k5	5.97	2461	chr7:33765965-33765974	M06478-NR2F2	-	10	0.607	29.8991	12.1408
chr7:33765693-33766211	-1.32	map2k5	5.97	2461	chr7:33765966-33765972	M03840-NR2F1	-	7	0.807	29.8991	12.1408
chr7:33765693-33766211	-1.32	map2k5	5.97	2461	chr7:33765966-33765973	M01984-NR2F6	-	8	0.972	29.8991	12.1408
chr14:20402653-20403015	-1.32	aff2	-6.84	3006	NA	NA	NA	NA	NA	29.8991	12.1408
chr3:58685668-58686010	-1.32	luc7l3	-1.98	60473	chr3:58685839-58685846	M01984-NR2F6	-	8	0.810	29.8991	12.1408
chr15:21851232-21851564	-1.32	sdhdb	-1.04	94371	NA	NA	NA	NA	NA	29.8991	12.1408
chr14:1156188-1156641	-1.20	hopx	6.76	2617	chr14:1156364-1156371	M05953-NR2F1	-	8	0.663	29.8991	13.2446
chr14:1156188-1156641	-1.20	hopx	6.76	2617	chr14:1156365-1156371	M03840-NR2F1	-	7	0.798	29.8991	13.2446
chr14:1156188-1156641	-1.20	hopx	6.76	2617	chr14:1156365-1156372	M01984-NR2F6	-	8	0.848	29.8991	13.2446
chr3:44396489-44396875	-1.20	atp5h	-1.07	8296	NA	NA	NA	NA	NA	29.8991	13.2446
chr17:29224387-29224774	-1.20	rcor1	3.43	9925	NA	NA	NA	NA	NA	29.8991	13.2446
chr2:45824701-45825258	-1.20	prpf38b	2.50	13776	NA	NA	NA	NA	NA	29.8991	13.2446
chr14:1156188-1156641	-1.20	sec24b	2.06	13882	chr14:1156364-1156371	M05953-NR2F1	-	8	0.663	29.8991	13.2446
chr14:1156188-1156641	-1.20	sec24b	2.06	13882	chr14:1156365-1156371	M03840-NR2F1	-	7	0.798	29.8991	13.2446
chr14:1156188-1156641	-1.20	sec24b	2.06	13882	chr14:1156365-1156372	M01984-NR2F6	-	8	0.848	29.8991	13.2446
chr24:13765363-13765805	-1.20	eya1	1.70	14843	chr24:13765536-13765545	M06478-NR2F2	-	10	0.713	29.8991	13.2446
chr24:13765363-13765805	-1.20	eya1	1.70	14843	chr24:13765537-13765544	M05541-NR2F2	-	8	0.730	29.8991	13.2446
chr24:13765363-13765805	-1.20	eya1	1.70	14843	chr24:13765537-13765545	M06477-NR2F1	-	9	0.755	29.8991	13.2446
chr24:13765363-13765805	-1.20	eya1	1.70	14843	chr24:13765554-13765560	M03840-NR2F1	-	7	0.674	29.8991	13.2446
chr13:9686663-9687005	-1.20	srbd1	5.76	15023	NA	NA	NA	NA	NA	29.8991	13.2446
chr10:33463620-33464227	-1.20	mdh2	-1.01	15362	chr10:33463912-33463929	M06693-NR2F6	-	18	0.636	29.8991	13.2446
chr10:33463620-33464227	-1.20	mdh2	-1.01	15362	chr10:33463917-33463930	M03927-NR2F6	-	14	0.734	29.8991	13.2446
chr10:33463620-33464227	-1.20	mdh2	-1.01	15362	chr10:33463919-33463936	M06693-NR2F6	-	18	0.676	29.8991	13.2446
chr10:33463620-33464227	-1.20	mdh2	-1.01	15362	chr10:33463920-33463932	M02591-NR2F1	-	13	0.826	29.8991	13.2446
chr10:33463620-33464227	-1.20	mdh2	-1.01	15362	chr10:33463920-33463932	M05954-NR2F1	-	13	0.826	29.8991	13.2446
chr10:33463620-33464227	-1.20	mdh2	-1.01	15362	chr10:33463920-33463934	M03841-NR2F2	-	15	0.798	29.8991	13.2446
chr10:33463620-33464227	-1.20	mdh2	-1.01	15362	chr10:33463923-33463930	M05953-NR2F1	-	8	0.885	29.8991	13.2446
chr10:33463620-33464227	-1.20	mdh2	-1.01	15362	chr10:33463923-33463932	M06478-NR2F2	-	10	1.000	29.8991	13.2446
chr10:33463620-33464227	-1.20	mdh2	-1.01	15362	chr10:33463924-33463930	M03840-NR2F1	-	7	1.000	29.8991	13.2446
chr10:33463620-33464227	-1.20	mdh2	-1.01	15362	chr10:33463924-33463931	M01984-NR2F6	-	8	0.925	29.8991	13.2446
chr10:33463620-33464227	-1.20	mdh2	-1.01	15362	chr10:33463924-33463931	M05541-NR2F2	-	8	1.000	29.8991	13.2446
chr10:33463620-33464227	-1.20	mdh2	-1.01	15362	chr10:33463924-33463932	M06477-NR2F1	-	9	1.000	29.8991	13.2446
chr10:33463620-33464227	-1.20	mdh2	-1.01	15362	chr10:33463945-33463952	M05953-NR2F1	-	8	0.670	29.8991	13.2446
chr10:33463620-33464227	-1.20	mdh2	-1.01	15362	chr10:33463946-33463952	M03840-NR2F1	-	7	0.798	29.8991	13.2446
chr10:33463620-33464227	-1.20	mdh2	-1.01	15362	chr10:33463946-33463953	M01984-NR2F6	-	8	0.869	29.8991	13.2446
chr10:33463620-33464227	-1.20	mdh2	-1.01	15362	chr10:33463975-33463982	M05953-NR2F1	-	8	0.678	29.8991	13.2446
chr10:33463620-33464227	-1.20	mdh2	-1.01	15362	chr10:33463976-33463982	M03840-NR2F1	-	7	0.859	29.8991	13.2446
chr10:33463620-33464227	-1.20	mdh2	-1.01	15362	chr10:33463976-33463983	M01984-NR2F6	-	8	0.806	29.8991	13.2446
chr2:45824701-45825258	-1.20	fndc7rs1	-7.47	23274	NA	NA	NA	NA	NA	29.8991	13.2446
chr23:42738134-42738522	-1.20	gpx7	-1.75	24832	chr23:42738352-42738364	M02591-NR2F1	-	13	0.632	29.8991	13.2446
chr23:42738134-42738522	-1.20	gpx7	-1.75	24832	chr23:42738352-42738364	M05954-NR2F1	-	13	0.632	29.8991	13.2446
chr23:42738134-42738522	-1.20	gpx7	-1.75	24832	chr23:42738355-42738362	M05953-NR2F1	-	8	0.805	29.8991	13.2446
chr23:42738134-42738522	-1.20	gpx7	-1.75	24832	chr23:42738356-42738362	M03840-NR2F1	-	7	0.870	29.8991	13.2446
chr23:42738134-42738522	-1.20	gpx7	-1.75	24832	chr23:42738356-42738363	M01984-NR2F6	-	8	0.930	29.8991	13.2446
chr11:22170806-22171355	-1.20	tmem183a	3.12	31720	chr11:22171094-22171101	M05953-NR2F1	-	8	0.697	29.8991	13.2446
chr11:22170806-22171355	-1.20	tmem183a	3.12	31720	chr11:22171095-22171101	M03840-NR2F1	-	7	0.729	29.8991	13.2446
chr11:22170806-22171355	-1.20	tmem183a	3.12	31720	chr11:22171095-22171102	M01984-NR2F6	-	8	0.841	29.8991	13.2446
chr3:44396489-44396875	-1.20	ndel1b	3.95	42398	NA	NA	NA	NA	NA	29.8991	13.2446
chr14:1156188-1156641	-1.20	adad1	-7.70	70155	chr14:1156364-1156371	M05953-NR2F1	-	8	0.663	29.8991	13.2446
chr14:1156188-1156641	-1.20	adad1	-7.70	70155	chr14:1156365-1156371	M03840-NR2F1	-	7	0.798	29.8991	13.2446
chr14:1156188-1156641	-1.20	adad1	-7.70	70155	chr14:1156365-1156372	M01984-NR2F6	-	8	0.848	29.8991	13.2446
chr10:33463620-33464227	-1.20	tbl2	-1.50	141804	chr10:33463912-33463929	M06693-NR2F6	-	18	0.636	29.8991	13.2446
chr10:33463620-33464227	-1.20	tbl2	-1.50	141804	chr10:33463917-33463930	M03927-NR2F6	-	14	0.734	29.8991	13.2446
chr10:33463620-33464227	-1.20	tbl2	-1.50	141804	chr10:33463919-33463936	M06693-NR2F6	-	18	0.676	29.8991	13.2446
chr10:33463620-33464227	-1.20	tbl2	-1.50	141804	chr10:33463920-33463932	M02591-NR2F1	-	13	0.826	29.8991	13.2446
chr10:33463620-33464227	-1.20	tbl2	-1.50	141804	chr10:33463920-33463932	M05954-NR2F1	-	13	0.826	29.8991	13.2446
chr10:33463620-33464227	-1.20	tbl2	-1.50	141804	chr10:33463920-33463934	M03841-NR2F2	-	15	0.798	29.8991	13.2446
chr10:33463620-33464227	-1.20	tbl2	-1.50	141804	chr10:33463923-33463930	M05953-NR2F1	-	8	0.885	29.8991	13.2446
chr10:33463620-33464227	-1.20	tbl2	-1.50	141804	chr10:33463923-33463932	M06478-NR2F2	-	10	1.000	29.8991	13.2446
chr10:33463620-33464227	-1.20	tbl2	-1.50	141804	chr10:33463924-33463930	M03840-NR2F1	-	7	1.000	29.8991	13.2446
chr10:33463620-33464227	-1.20	tbl2	-1.50	141804	chr10:33463924-33463931	M01984-NR2F6	-	8	0.925	29.8991	13.2446
chr10:33463620-33464227	-1.20	tbl2	-1.50	141804	chr10:33463924-33463931	M05541-NR2F2	-	8	1.000	29.8991	13.2446
chr10:33463620-33464227	-1.20	tbl2	-1.50	141804	chr10:33463924-33463932	M06477-NR2F1	-	9	1.000	29.8991	13.2446
chr10:33463620-33464227	-1.20	tbl2	-1.50	141804	chr10:33463945-33463952	M05953-NR2F1	-	8	0.670	29.8991	13.2446
chr10:33463620-33464227	-1.20	tbl2	-1.50	141804	chr10:33463946-33463952	M03840-NR2F1	-	7	0.798	29.8991	13.2446
chr10:33463620-33464227	-1.20	tbl2	-1.50	141804	chr10:33463946-33463953	M01984-NR2F6	-	8	0.869	29.8991	13.2446
chr10:33463620-33464227	-1.20	tbl2	-1.50	141804	chr10:33463975-33463982	M05953-NR2F1	-	8	0.678	29.8991	13.2446
chr10:33463620-33464227	-1.20	tbl2	-1.50	141804	chr10:33463976-33463982	M03840-NR2F1	-	7	0.859	29.8991	13.2446
chr10:33463620-33464227	-1.20	tbl2	-1.50	141804	chr10:33463976-33463983	M01984-NR2F6	-	8	0.806	29.8991	13.2446
chr1:43499252-43499670	-1.08	ctnnd1	-1.23	255	NA	NA	NA	NA	NA	29.8991	14.3483
chr3:40349961-40350303	-1.08	tnrc18	-1.77	2974	NA	NA	NA	NA	NA	29.8991	14.3483
chr9:30655716-30656123	-1.08	cx50.5	-1.01	32965	chr9:30655718-30655724	M03840-NR2F1	-	7	0.674	29.8991	14.3483
chr9:30655716-30656123	-1.08	cx50.5	-1.01	32965	chr9:30655932-30655939	M05953-NR2F1	-	8	0.660	29.8991	14.3483
chr9:30655716-30656123	-1.08	cx50.5	-1.01	32965	chr9:30655933-30655940	M01984-NR2F6	-	8	0.875	29.8991	14.3483
chr9:30655716-30656123	-1.08	cx50.5	-1.01	32965	chr9:30655997-30656003	M03840-NR2F1	-	7	0.672	29.8991	14.3483
chr9:30655716-30656123	-1.08	cx50.5	-1.01	32965	chr9:30655997-30656004	M05541-NR2F2	-	8	0.770	29.8991	14.3483
chr9:30655716-30656123	-1.08	cx50.5	-1.01	32965	chr9:30655997-30656005	M06477-NR2F1	-	9	0.775	29.8991	14.3483
chr9:30655716-30656123	-1.08	cx50.5	-1.01	32965	chr9:30655997-30656010	M03927-NR2F6	-	14	0.620	29.8991	14.3483
chr3:54662268-54662624	-1.08	mgrn1b	3.46	42029	NA	NA	NA	NA	NA	29.8991	14.3483
chr9:30655716-30656123	-1.08	piga	-3.30	72555	chr9:30655718-30655724	M03840-NR2F1	-	7	0.674	29.8991	14.3483
chr9:30655716-30656123	-1.08	piga	-3.30	72555	chr9:30655932-30655939	M05953-NR2F1	-	8	0.660	29.8991	14.3483
chr9:30655716-30656123	-1.08	piga	-3.30	72555	chr9:30655933-30655940	M01984-NR2F6	-	8	0.875	29.8991	14.3483
chr9:30655716-30656123	-1.08	piga	-3.30	72555	chr9:30655997-30656003	M03840-NR2F1	-	7	0.672	29.8991	14.3483
chr9:30655716-30656123	-1.08	piga	-3.30	72555	chr9:30655997-30656004	M05541-NR2F2	-	8	0.770	29.8991	14.3483
chr9:30655716-30656123	-1.08	piga	-3.30	72555	chr9:30655997-30656005	M06477-NR2F1	-	9	0.775	29.8991	14.3483
chr9:30655716-30656123	-1.08	piga	-3.30	72555	chr9:30655997-30656010	M03927-NR2F6	-	14	0.620	29.8991	14.3483
chr21:45244524-45244815	-1.08	ube2b	5.97	80603	chr21:45244649-45244656	M05953-NR2F1	-	8	0.690	29.8991	14.3483
chr21:45244524-45244815	-1.08	ube2b	5.97	80603	chr21:45244650-45244656	M03840-NR2F1	-	7	0.668	29.8991	14.3483
chr21:45244524-45244815	-1.08	ube2b	5.97	80603	chr21:45244650-45244657	M01984-NR2F6	-	8	0.904	29.8991	14.3483
chr2:37634361-37634836	-1.08	sppl2	-2.17	113810	chr2:37634419-37634425	M03840-NR2F1	-	7	0.611	29.8991	14.3483
chr2:37634361-37634836	-1.08	sppl2	-2.17	113810	chr2:37634419-37634427	M06477-NR2F1	-	9	0.601	29.8991	14.3483
chr2:37634361-37634836	-1.08	sppl2	-2.17	113810	chr2:37634482-37634491	M05542-NR2F2	-	10	0.608	29.8991	14.3483
chr2:37634361-37634836	-1.08	sppl2	-2.17	113810	chr2:37634530-37634536	M03840-NR2F1	-	7	0.609	29.8991	14.3483
chr2:37634361-37634836	-1.08	sppl2	-2.17	113810	chr2:37634625-37634632	M05541-NR2F2	-	8	0.763	29.8991	14.3483
chr2:37634361-37634836	-1.08	sppl2	-2.17	113810	chr2:37634783-37634789	M03840-NR2F1	-	7	0.636	29.8991	14.3483
chr2:37634361-37634836	-1.08	sppl2	-2.17	113810	chr2:37634783-37634790	M05541-NR2F2	-	8	0.608	29.8991	14.3483
chr9:30655716-30656123	-1.08	srpx	6.72	149671	chr9:30655718-30655724	M03840-NR2F1	-	7	0.674	29.8991	14.3483
chr9:30655716-30656123	-1.08	srpx	6.72	149671	chr9:30655932-30655939	M05953-NR2F1	-	8	0.660	29.8991	14.3483
chr9:30655716-30656123	-1.08	srpx	6.72	149671	chr9:30655933-30655940	M01984-NR2F6	-	8	0.875	29.8991	14.3483
chr9:30655716-30656123	-1.08	srpx	6.72	149671	chr9:30655997-30656003	M03840-NR2F1	-	7	0.672	29.8991	14.3483
chr9:30655716-30656123	-1.08	srpx	6.72	149671	chr9:30655997-30656004	M05541-NR2F2	-	8	0.770	29.8991	14.3483
chr9:30655716-30656123	-1.08	srpx	6.72	149671	chr9:30655997-30656005	M06477-NR2F1	-	9	0.775	29.8991	14.3483
chr9:30655716-30656123	-1.08	srpx	6.72	149671	chr9:30655997-30656010	M03927-NR2F6	-	14	0.620	29.8991	14.3483
chr9:30655716-30656123	-1.08	mid1ip1a	7.66	202048	chr9:30655718-30655724	M03840-NR2F1	-	7	0.674	29.8991	14.3483
chr9:30655716-30656123	-1.08	mid1ip1a	7.66	202048	chr9:30655932-30655939	M05953-NR2F1	-	8	0.660	29.8991	14.3483
chr9:30655716-30656123	-1.08	mid1ip1a	7.66	202048	chr9:30655933-30655940	M01984-NR2F6	-	8	0.875	29.8991	14.3483
chr9:30655716-30656123	-1.08	mid1ip1a	7.66	202048	chr9:30655997-30656003	M03840-NR2F1	-	7	0.672	29.8991	14.3483
chr9:30655716-30656123	-1.08	mid1ip1a	7.66	202048	chr9:30655997-30656004	M05541-NR2F2	-	8	0.770	29.8991	14.3483
chr9:30655716-30656123	-1.08	mid1ip1a	7.66	202048	chr9:30655997-30656005	M06477-NR2F1	-	9	0.775	29.8991	14.3483
chr9:30655716-30656123	-1.08	mid1ip1a	7.66	202048	chr9:30655997-30656010	M03927-NR2F6	-	14	0.620	29.8991	14.3483
chr14:32374372-32375088	1.15	arr3b	6.41	122713	chr14:32374396-32374405	M06478-NR2F2	-	10	0.604	28.9931	65.1191
chr14:32374372-32375088	1.15	arr3b	6.41	122713	chr14:32374397-32374403	M03840-NR2F1	-	7	0.611	28.9931	65.1191
chr14:32374372-32375088	1.15	arr3b	6.41	122713	chr14:32374397-32374404	M05541-NR2F2	-	8	0.616	28.9931	65.1191
chr2:15775303-15775705	-1.74	col11a1b	1.66	0	chr2:15775643-15775650	M05541-NR2F2	-	8	0.702	28.9931	8.8297
chr14:26422225-26422623	-1.42	eef1g	-1.00	0	chr14:26422555-26422564	M06478-NR2F2	-	10	0.680	28.9931	11.0371
chr14:26422225-26422623	-1.42	eef1g	-1.00	0	chr14:26422556-26422563	M05541-NR2F2	-	8	0.744	28.9931	11.0371
chr14:30006278-30006820	-1.42	pdgfrl	2.83	11997	chr14:30006315-30006322	M05953-NR2F1	-	8	0.686	28.9931	11.0371
chr14:30006278-30006820	-1.42	pdgfrl	2.83	11997	chr14:30006316-30006322	M03840-NR2F1	-	7	0.859	28.9931	11.0371
chr14:30006278-30006820	-1.42	pdgfrl	2.83	11997	chr14:30006316-30006323	M01984-NR2F6	-	8	0.836	28.9931	11.0371
chr14:30006278-30006820	-1.42	pdgfrl	2.83	11997	chr14:30006316-30006323	M05541-NR2F2	-	8	0.655	28.9931	11.0371
chr14:30006278-30006820	-1.42	pdgfrl	2.83	11997	chr14:30006316-30006324	M06477-NR2F1	-	9	0.675	28.9931	11.0371
chr14:30006278-30006820	-1.42	pdgfrl	2.83	11997	chr14:30006596-30006603	M05953-NR2F1	-	8	0.684	28.9931	11.0371
chr14:30006278-30006820	-1.42	pdgfrl	2.83	11997	chr14:30006597-30006603	M03840-NR2F1	-	7	0.729	28.9931	11.0371
chr14:30006278-30006820	-1.42	pdgfrl	2.83	11997	chr14:30006597-30006604	M01984-NR2F6	-	8	0.841	28.9931	11.0371
chr14:30006278-30006820	-1.42	pdgfrl	2.83	11997	chr14:30006673-30006685	M02591-NR2F1	-	13	0.785	28.9931	11.0371
chr14:30006278-30006820	-1.42	pdgfrl	2.83	11997	chr14:30006673-30006685	M05954-NR2F1	-	13	0.785	28.9931	11.0371
chr14:30006278-30006820	-1.42	pdgfrl	2.83	11997	chr14:30006673-30006687	M03841-NR2F2	-	15	0.716	28.9931	11.0371
chr14:30006278-30006820	-1.42	pdgfrl	2.83	11997	chr14:30006676-30006683	M05953-NR2F1	-	8	0.885	28.9931	11.0371
chr14:30006278-30006820	-1.42	pdgfrl	2.83	11997	chr14:30006676-30006685	M06478-NR2F2	-	10	0.697	28.9931	11.0371
chr14:30006278-30006820	-1.42	pdgfrl	2.83	11997	chr14:30006677-30006683	M03840-NR2F1	-	7	1.000	28.9931	11.0371
chr14:30006278-30006820	-1.42	pdgfrl	2.83	11997	chr14:30006677-30006684	M01984-NR2F6	-	8	0.916	28.9931	11.0371
chr14:30006278-30006820	-1.42	pdgfrl	2.83	11997	chr14:30006677-30006684	M05541-NR2F2	-	8	0.815	28.9931	11.0371
chr14:30006278-30006820	-1.42	pdgfrl	2.83	11997	chr14:30006677-30006685	M06477-NR2F1	-	9	0.699	28.9931	11.0371
chr14:30006278-30006820	-1.42	pdgfrl	2.83	11997	chr14:30006802-30006810	M06477-NR2F1	-	9	0.643	28.9931	11.0371
chr14:49034255-49034542	-1.42	etfdh	-2.06	48573	NA	NA	NA	NA	NA	28.9931	11.0371
chr19:22470861-22471337	-1.28	sall3b	5.97	7147	chr19:22470894-22470903	M06478-NR2F2	-	10	0.672	28.9931	12.1408
chr19:22470861-22471337	-1.28	sall3b	5.97	7147	chr19:22470895-22470901	M03840-NR2F1	-	7	0.674	28.9931	12.1408
chr19:22470861-22471337	-1.28	sall3b	5.97	7147	chr19:22470895-22470902	M05541-NR2F2	-	8	0.756	28.9931	12.1408
chr19:22470861-22471337	-1.28	sall3b	5.97	7147	chr19:22470895-22470903	M06477-NR2F1	-	9	0.706	28.9931	12.1408
chr19:22470861-22471337	-1.28	sall3b	5.97	7147	chr19:22470903-22470912	M05542-NR2F2	-	10	0.668	28.9931	12.1408
chr19:22470861-22471337	-1.28	sall3b	5.97	7147	chr19:22471137-22471144	M05541-NR2F2	-	8	0.730	28.9931	12.1408
chr19:22470861-22471337	-1.28	sall3b	5.97	7147	chr19:22471137-22471145	M06477-NR2F1	-	9	0.633	28.9931	12.1408
chr13:17411077-17411463	-1.28	c13h10orf11	6.21	77708	NA	NA	NA	NA	NA	28.9931	12.1408
chr20:50249782-50250049	-1.15	LOC100535765	-1.24	378	NA	NA	NA	NA	NA	28.9931	13.2446
chr21:8089057-8089834	-1.15	LOC100330530	3.51	537	chr21:8089749-8089764	M05952-NR2F1	-	16	0.942	28.9931	13.2446
chr21:8089057-8089834	-1.15	LOC100330530	3.51	537	chr21:8089790-8089802	M02591-NR2F1	-	13	0.640	28.9931	13.2446
chr21:8089057-8089834	-1.15	LOC100330530	3.51	537	chr21:8089790-8089802	M05954-NR2F1	-	13	0.640	28.9931	13.2446
chr21:8089057-8089834	-1.15	LOC100330530	3.51	537	chr21:8089793-8089800	M05953-NR2F1	-	8	0.785	28.9931	13.2446
chr21:8089057-8089834	-1.15	LOC100330530	3.51	537	chr21:8089793-8089802	M06478-NR2F2	-	10	0.699	28.9931	13.2446
chr21:8089057-8089834	-1.15	LOC100330530	3.51	537	chr21:8089793-8089807	M05951-NR2F1	-	15	0.813	28.9931	13.2446
chr21:8089057-8089834	-1.15	LOC100330530	3.51	537	chr21:8089793-8089807	M09875-NR2F1	-	15	0.857	28.9931	13.2446
chr21:8089057-8089834	-1.15	LOC100330530	3.51	537	chr21:8089793-8089807	M09877-NR2F1	-	15	0.902	28.9931	13.2446
chr21:8089057-8089834	-1.15	LOC100330530	3.51	537	chr21:8089793-8089807	M09879-NR2F1	-	15	0.836	28.9931	13.2446
chr21:8089057-8089834	-1.15	LOC100330530	3.51	537	chr21:8089793-8089807	M09881-NR2F1	-	15	0.878	28.9931	13.2446
chr21:8089057-8089834	-1.15	LOC100330530	3.51	537	chr21:8089793-8089807	M09883-NR2F6	-	15	0.816	28.9931	13.2446
chr21:8089057-8089834	-1.15	LOC100330530	3.51	537	chr21:8089793-8089807	M09885-NR2F6	-	15	0.762	28.9931	13.2446
chr21:8089057-8089834	-1.15	LOC100330530	3.51	537	chr21:8089793-8089807	M09887-NR2F6	-	15	0.816	28.9931	13.2446
chr21:8089057-8089834	-1.15	LOC100330530	3.51	537	chr21:8089793-8089807	M09889-NR2F6	-	15	0.842	28.9931	13.2446
chr21:8089057-8089834	-1.15	LOC100330530	3.51	537	chr21:8089794-8089800	M03840-NR2F1	-	7	1.000	28.9931	13.2446
chr21:8089057-8089834	-1.15	LOC100330530	3.51	537	chr21:8089794-8089801	M01984-NR2F6	-	8	0.925	28.9931	13.2446
chr21:8089057-8089834	-1.15	LOC100330530	3.51	537	chr21:8089794-8089801	M05541-NR2F2	-	8	1.000	28.9931	13.2446
chr21:8089057-8089834	-1.15	LOC100330530	3.51	537	chr21:8089794-8089802	M06477-NR2F1	-	9	0.878	28.9931	13.2446
chr21:8089057-8089834	-1.15	LOC100330530	3.51	537	chr21:8089794-8089805	M06476-NR2F1	-	12	0.867	28.9931	13.2446
chr21:8089057-8089834	-1.15	LOC100330530	3.51	537	chr21:8089794-8089807	M03927-NR2F6	-	14	0.800	28.9931	13.2446
chr21:8089057-8089834	-1.15	LOC100330530	3.51	537	chr21:8089794-8089807	M05956-NR2F6	-	14	0.826	28.9931	13.2446
chr21:8089057-8089834	-1.15	LOC100330530	3.51	537	chr21:8089794-8089807	M05957-NR2F6	-	14	0.861	28.9931	13.2446
chr12:3885402-3886100	-1.15	nif3l1	-1.67	12583	chr12:3885510-3885517	M05953-NR2F1	-	8	0.904	28.9931	13.2446
chr12:3885402-3886100	-1.15	nif3l1	-1.67	12583	chr12:3885511-3885517	M03840-NR2F1	-	7	0.870	28.9931	13.2446
chr12:3885402-3886100	-1.15	nif3l1	-1.67	12583	chr12:3885511-3885518	M01984-NR2F6	-	8	0.933	28.9931	13.2446
chr12:3885402-3886100	-1.15	nif3l1	-1.67	12583	chr12:3885832-3885839	M05953-NR2F1	-	8	0.660	28.9931	13.2446
chr12:3885402-3886100	-1.15	nif3l1	-1.67	12583	chr12:3885833-3885840	M01984-NR2F6	-	8	0.875	28.9931	13.2446
chr12:3885402-3886100	-1.15	nif3l1	-1.67	12583	chr12:3885982-3885995	M03927-NR2F6	-	14	0.734	28.9931	13.2446
chr12:3885402-3886100	-1.15	nif3l1	-1.67	12583	chr12:3885985-3885997	M02591-NR2F1	-	13	0.669	28.9931	13.2446
chr12:3885402-3886100	-1.15	nif3l1	-1.67	12583	chr12:3885985-3885997	M05954-NR2F1	-	13	0.669	28.9931	13.2446
chr12:3885402-3886100	-1.15	nif3l1	-1.67	12583	chr12:3885985-3885999	M03841-NR2F2	-	15	0.662	28.9931	13.2446
chr12:3885402-3886100	-1.15	nif3l1	-1.67	12583	chr12:3885988-3885995	M05953-NR2F1	-	8	0.885	28.9931	13.2446
chr12:3885402-3886100	-1.15	nif3l1	-1.67	12583	chr12:3885988-3885997	M06478-NR2F2	-	10	0.856	28.9931	13.2446
chr12:3885402-3886100	-1.15	nif3l1	-1.67	12583	chr12:3885989-3885995	M03840-NR2F1	-	7	1.000	28.9931	13.2446
chr12:3885402-3886100	-1.15	nif3l1	-1.67	12583	chr12:3885989-3885996	M01984-NR2F6	-	8	0.916	28.9931	13.2446
chr12:3885402-3886100	-1.15	nif3l1	-1.67	12583	chr12:3885989-3885996	M05541-NR2F2	-	8	0.815	28.9931	13.2446
chr12:3885402-3886100	-1.15	nif3l1	-1.67	12583	chr12:3885989-3885997	M06477-NR2F1	-	9	0.821	28.9931	13.2446
chr14:38404083-38404350	-1.15	fbxo38	3.89	54698	NA	NA	NA	NA	NA	28.9931	13.2446
chr4:3090247-3090601	-1.04	plekha5	2.14	0	chr4:3090465-3090472	M05541-NR2F2	-	8	0.744	28.9931	14.3483
chr22:2874574-2874831	-1.04	pak2b	1.66	6072	chr22:2874583-2874590	M05953-NR2F1	-	8	0.825	28.9931	14.3483
chr22:2874574-2874831	-1.04	pak2b	1.66	6072	chr22:2874584-2874590	M03840-NR2F1	-	7	0.870	28.9931	14.3483
chr22:2874574-2874831	-1.04	pak2b	1.66	6072	chr22:2874584-2874591	M01984-NR2F6	-	8	0.951	28.9931	14.3483
chr24:35492895-35493427	-1.04	snai2	4.39	7586	NA	NA	NA	NA	NA	28.9931	14.3483
chr9:1913325-1913698	-1.04	LOC108191292	-4.91	16966	NA	NA	NA	NA	NA	28.9931	14.3483
chr9:1913325-1913698	-1.04	hoxd3a	7.97	22557	NA	NA	NA	NA	NA	28.9931	14.3483
chr5:21520184-21520508	-1.04	zc4h2	1.31	49402	chr5:21520244-21520251	M01984-NR2F6	-	8	0.875	28.9931	14.3483
chr5:21520184-21520508	-1.04	zc4h2	1.31	49402	chr5:21520261-21520273	M02591-NR2F1	-	13	0.733	28.9931	14.3483
chr5:21520184-21520508	-1.04	zc4h2	1.31	49402	chr5:21520261-21520273	M05954-NR2F1	-	13	0.733	28.9931	14.3483
chr5:21520184-21520508	-1.04	zc4h2	1.31	49402	chr5:21520261-21520275	M03841-NR2F2	-	15	0.718	28.9931	14.3483
chr5:21520184-21520508	-1.04	zc4h2	1.31	49402	chr5:21520264-21520271	M05953-NR2F1	-	8	0.785	28.9931	14.3483
chr5:21520184-21520508	-1.04	zc4h2	1.31	49402	chr5:21520264-21520273	M06478-NR2F2	-	10	0.858	28.9931	14.3483
chr5:21520184-21520508	-1.04	zc4h2	1.31	49402	chr5:21520264-21520278	M05951-NR2F1	-	15	0.894	28.9931	14.3483
chr5:21520184-21520508	-1.04	zc4h2	1.31	49402	chr5:21520264-21520278	M09875-NR2F1	-	15	0.913	28.9931	14.3483
chr5:21520184-21520508	-1.04	zc4h2	1.31	49402	chr5:21520264-21520278	M09877-NR2F1	-	15	0.939	28.9931	14.3483
chr5:21520184-21520508	-1.04	zc4h2	1.31	49402	chr5:21520264-21520278	M09879-NR2F1	-	15	0.937	28.9931	14.3483
chr5:21520184-21520508	-1.04	zc4h2	1.31	49402	chr5:21520264-21520278	M09881-NR2F1	-	15	0.946	28.9931	14.3483
chr5:21520184-21520508	-1.04	zc4h2	1.31	49402	chr5:21520264-21520278	M09883-NR2F6	-	15	0.868	28.9931	14.3483
chr5:21520184-21520508	-1.04	zc4h2	1.31	49402	chr5:21520264-21520278	M09885-NR2F6	-	15	0.869	28.9931	14.3483
chr5:21520184-21520508	-1.04	zc4h2	1.31	49402	chr5:21520264-21520278	M09887-NR2F6	-	15	0.906	28.9931	14.3483
chr5:21520184-21520508	-1.04	zc4h2	1.31	49402	chr5:21520264-21520278	M09889-NR2F6	-	15	0.879	28.9931	14.3483
chr5:21520184-21520508	-1.04	zc4h2	1.31	49402	chr5:21520265-21520271	M03840-NR2F1	-	7	1.000	28.9931	14.3483
chr5:21520184-21520508	-1.04	zc4h2	1.31	49402	chr5:21520265-21520272	M01984-NR2F6	-	8	0.925	28.9931	14.3483
chr5:21520184-21520508	-1.04	zc4h2	1.31	49402	chr5:21520265-21520272	M05541-NR2F2	-	8	1.000	28.9931	14.3483
chr5:21520184-21520508	-1.04	zc4h2	1.31	49402	chr5:21520265-21520273	M06477-NR2F1	-	9	1.000	28.9931	14.3483
chr5:21520184-21520508	-1.04	zc4h2	1.31	49402	chr5:21520265-21520276	M06476-NR2F1	-	12	1.000	28.9931	14.3483
chr5:21520184-21520508	-1.04	zc4h2	1.31	49402	chr5:21520265-21520278	M03927-NR2F6	-	14	0.929	28.9931	14.3483
chr5:21520184-21520508	-1.04	zc4h2	1.31	49402	chr5:21520265-21520278	M05956-NR2F6	-	14	0.912	28.9931	14.3483
chr5:21520184-21520508	-1.04	zc4h2	1.31	49402	chr5:21520265-21520278	M05957-NR2F6	-	14	0.947	28.9931	14.3483
chr5:21520184-21520508	-1.04	zc4h2	1.31	49402	chr5:21520271-21520278	M05953-NR2F1	-	8	0.750	28.9931	14.3483
chr5:21520184-21520508	-1.04	zc4h2	1.31	49402	chr5:21520272-21520278	M03840-NR2F1	-	7	0.798	28.9931	14.3483
chr5:21520184-21520508	-1.04	zc4h2	1.31	49402	chr5:21520272-21520279	M01984-NR2F6	-	8	0.869	28.9931	14.3483
chr5:21520184-21520508	-1.04	zc4h2	1.31	49402	chr5:21520279-21520291	M02591-NR2F1	-	13	0.689	28.9931	14.3483
chr5:21520184-21520508	-1.04	zc4h2	1.31	49402	chr5:21520279-21520291	M05954-NR2F1	-	13	0.689	28.9931	14.3483
chr5:21520184-21520508	-1.04	zc4h2	1.31	49402	chr5:21520279-21520293	M03841-NR2F2	-	15	0.835	28.9931	14.3483
chr5:21520184-21520508	-1.04	zc4h2	1.31	49402	chr5:21520282-21520289	M05953-NR2F1	-	8	0.981	28.9931	14.3483
chr5:21520184-21520508	-1.04	zc4h2	1.31	49402	chr5:21520282-21520291	M06478-NR2F2	-	10	0.932	28.9931	14.3483
chr5:21520184-21520508	-1.04	zc4h2	1.31	49402	chr5:21520282-21520296	M09875-NR2F1	-	15	0.683	28.9931	14.3483
chr5:21520184-21520508	-1.04	zc4h2	1.31	49402	chr5:21520282-21520296	M09877-NR2F1	-	15	0.652	28.9931	14.3483
chr5:21520184-21520508	-1.04	zc4h2	1.31	49402	chr5:21520282-21520296	M09881-NR2F1	-	15	0.616	28.9931	14.3483
chr5:21520184-21520508	-1.04	zc4h2	1.31	49402	chr5:21520282-21520296	M09887-NR2F6	-	15	0.726	28.9931	14.3483
chr5:21520184-21520508	-1.04	zc4h2	1.31	49402	chr5:21520282-21520296	M09889-NR2F6	-	15	0.751	28.9931	14.3483
chr5:21520184-21520508	-1.04	zc4h2	1.31	49402	chr5:21520283-21520289	M03840-NR2F1	-	7	0.937	28.9931	14.3483
chr5:21520184-21520508	-1.04	zc4h2	1.31	49402	chr5:21520283-21520290	M01984-NR2F6	-	8	0.965	28.9931	14.3483
chr5:21520184-21520508	-1.04	zc4h2	1.31	49402	chr5:21520283-21520290	M05541-NR2F2	-	8	0.860	28.9931	14.3483
chr5:21520184-21520508	-1.04	zc4h2	1.31	49402	chr5:21520283-21520291	M06477-NR2F1	-	9	0.891	28.9931	14.3483
chr5:21520184-21520508	-1.04	zc4h2	1.31	49402	chr5:21520283-21520294	M06476-NR2F1	-	12	0.888	28.9931	14.3483
chr5:21520184-21520508	-1.04	zc4h2	1.31	49402	chr5:21520283-21520296	M03927-NR2F6	-	14	0.731	28.9931	14.3483
chr5:21520184-21520508	-1.04	zc4h2	1.31	49402	chr5:21520283-21520296	M05957-NR2F6	-	14	0.612	28.9931	14.3483
chr13:24565878-24566190	-1.04	col17a1b	5.68	53613	chr13:24566158-24566164	M03840-NR2F1	-	7	0.636	28.9931	14.3483
chr13:49446763-49447144	-2.37	b3galnt2	7.46	36978	NA	NA	NA	NA	NA	28.087	5.51856
chr23:20722334-20722733	-1.88	dpm1	-1.19	131249	chr23:20722648-20722655	M05541-NR2F2	-	8	0.702	28.087	7.72599
chr23:20722334-20722733	-1.88	dpm1	-1.19	131249	chr23:20722663-20722672	M05542-NR2F2	-	10	0.650	28.087	7.72599
chr19:28112034-28112603	-1.69	adcy2b	5.68	0	chr19:28112202-28112211	M05542-NR2F2	-	10	0.642	28.087	8.8297
chr16:46662714-46663014	-1.69	tmem176l.3a	-2.44	9469	chr16:46662778-46662785	M05541-NR2F2	-	8	0.688	28.087	8.8297
chr20:29636384-29637010	-1.69	ywhaqa	1.34	26031	chr20:29636546-29636553	M05953-NR2F1	-	8	0.894	28.087	8.8297
chr20:29636384-29637010	-1.69	ywhaqa	1.34	26031	chr20:29636547-29636553	M03840-NR2F1	-	7	0.937	28.087	8.8297
chr20:29636384-29637010	-1.69	ywhaqa	1.34	26031	chr20:29636547-29636554	M01984-NR2F6	-	8	0.935	28.087	8.8297
chr20:29636384-29637010	-1.69	ywhaqa	1.34	26031	chr20:29636547-29636554	M05541-NR2F2	-	8	0.624	28.087	8.8297
chr20:29636384-29637010	-1.69	ywhaqa	1.34	26031	chr20:29636963-29636975	M02591-NR2F1	-	13	0.665	28.087	8.8297
chr20:29636384-29637010	-1.69	ywhaqa	1.34	26031	chr20:29636963-29636975	M05954-NR2F1	-	13	0.665	28.087	8.8297
chr20:29636384-29637010	-1.69	ywhaqa	1.34	26031	chr20:29636966-29636973	M05953-NR2F1	-	8	0.798	28.087	8.8297
chr20:29636384-29637010	-1.69	ywhaqa	1.34	26031	chr20:29636966-29636975	M06478-NR2F2	-	10	0.884	28.087	8.8297
chr20:29636384-29637010	-1.69	ywhaqa	1.34	26031	chr20:29636966-29636980	M09877-NR2F1	-	15	0.668	28.087	8.8297
chr20:29636384-29637010	-1.69	ywhaqa	1.34	26031	chr20:29636966-29636980	M09881-NR2F1	-	15	0.632	28.087	8.8297
chr20:29636384-29637010	-1.69	ywhaqa	1.34	26031	chr20:29636966-29636980	M09887-NR2F6	-	15	0.658	28.087	8.8297
chr20:29636384-29637010	-1.69	ywhaqa	1.34	26031	chr20:29636966-29636980	M09889-NR2F6	-	15	0.640	28.087	8.8297
chr20:29636384-29637010	-1.69	ywhaqa	1.34	26031	chr20:29636967-29636973	M03840-NR2F1	-	7	1.000	28.087	8.8297
chr20:29636384-29637010	-1.69	ywhaqa	1.34	26031	chr20:29636967-29636974	M01984-NR2F6	-	8	0.925	28.087	8.8297
chr20:29636384-29637010	-1.69	ywhaqa	1.34	26031	chr20:29636967-29636974	M05541-NR2F2	-	8	1.000	28.087	8.8297
chr20:29636384-29637010	-1.69	ywhaqa	1.34	26031	chr20:29636967-29636975	M06477-NR2F1	-	9	1.000	28.087	8.8297
chr20:29636384-29637010	-1.69	ywhaqa	1.34	26031	chr20:29636967-29636978	M06476-NR2F1	-	12	0.798	28.087	8.8297
chr20:29636384-29637010	-1.69	ywhaqa	1.34	26031	chr20:29636967-29636980	M05957-NR2F6	-	14	0.684	28.087	8.8297
chr20:29636384-29637010	-1.69	klf11a	1.70	33401	chr20:29636546-29636553	M05953-NR2F1	-	8	0.894	28.087	8.8297
chr20:29636384-29637010	-1.69	klf11a	1.70	33401	chr20:29636547-29636553	M03840-NR2F1	-	7	0.937	28.087	8.8297
chr20:29636384-29637010	-1.69	klf11a	1.70	33401	chr20:29636547-29636554	M01984-NR2F6	-	8	0.935	28.087	8.8297
chr20:29636384-29637010	-1.69	klf11a	1.70	33401	chr20:29636547-29636554	M05541-NR2F2	-	8	0.624	28.087	8.8297
chr20:29636384-29637010	-1.69	klf11a	1.70	33401	chr20:29636963-29636975	M02591-NR2F1	-	13	0.665	28.087	8.8297
chr20:29636384-29637010	-1.69	klf11a	1.70	33401	chr20:29636963-29636975	M05954-NR2F1	-	13	0.665	28.087	8.8297
chr20:29636384-29637010	-1.69	klf11a	1.70	33401	chr20:29636966-29636973	M05953-NR2F1	-	8	0.798	28.087	8.8297
chr20:29636384-29637010	-1.69	klf11a	1.70	33401	chr20:29636966-29636975	M06478-NR2F2	-	10	0.884	28.087	8.8297
chr20:29636384-29637010	-1.69	klf11a	1.70	33401	chr20:29636966-29636980	M09877-NR2F1	-	15	0.668	28.087	8.8297
chr20:29636384-29637010	-1.69	klf11a	1.70	33401	chr20:29636966-29636980	M09881-NR2F1	-	15	0.632	28.087	8.8297
chr20:29636384-29637010	-1.69	klf11a	1.70	33401	chr20:29636966-29636980	M09887-NR2F6	-	15	0.658	28.087	8.8297
chr20:29636384-29637010	-1.69	klf11a	1.70	33401	chr20:29636966-29636980	M09889-NR2F6	-	15	0.640	28.087	8.8297
chr20:29636384-29637010	-1.69	klf11a	1.70	33401	chr20:29636967-29636973	M03840-NR2F1	-	7	1.000	28.087	8.8297
chr20:29636384-29637010	-1.69	klf11a	1.70	33401	chr20:29636967-29636974	M01984-NR2F6	-	8	0.925	28.087	8.8297
chr20:29636384-29637010	-1.69	klf11a	1.70	33401	chr20:29636967-29636974	M05541-NR2F2	-	8	1.000	28.087	8.8297
chr20:29636384-29637010	-1.69	klf11a	1.70	33401	chr20:29636967-29636975	M06477-NR2F1	-	9	1.000	28.087	8.8297
chr20:29636384-29637010	-1.69	klf11a	1.70	33401	chr20:29636967-29636978	M06476-NR2F1	-	12	0.798	28.087	8.8297
chr20:29636384-29637010	-1.69	klf11a	1.70	33401	chr20:29636967-29636980	M05957-NR2F6	-	14	0.684	28.087	8.8297
chr20:29636384-29637010	-1.69	actc1a	-1.09	55755	chr20:29636546-29636553	M05953-NR2F1	-	8	0.894	28.087	8.8297
chr20:29636384-29637010	-1.69	actc1a	-1.09	55755	chr20:29636547-29636553	M03840-NR2F1	-	7	0.937	28.087	8.8297
chr20:29636384-29637010	-1.69	actc1a	-1.09	55755	chr20:29636547-29636554	M01984-NR2F6	-	8	0.935	28.087	8.8297
chr20:29636384-29637010	-1.69	actc1a	-1.09	55755	chr20:29636547-29636554	M05541-NR2F2	-	8	0.624	28.087	8.8297
chr20:29636384-29637010	-1.69	actc1a	-1.09	55755	chr20:29636963-29636975	M02591-NR2F1	-	13	0.665	28.087	8.8297
chr20:29636384-29637010	-1.69	actc1a	-1.09	55755	chr20:29636963-29636975	M05954-NR2F1	-	13	0.665	28.087	8.8297
chr20:29636384-29637010	-1.69	actc1a	-1.09	55755	chr20:29636966-29636973	M05953-NR2F1	-	8	0.798	28.087	8.8297
chr20:29636384-29637010	-1.69	actc1a	-1.09	55755	chr20:29636966-29636975	M06478-NR2F2	-	10	0.884	28.087	8.8297
chr20:29636384-29637010	-1.69	actc1a	-1.09	55755	chr20:29636966-29636980	M09877-NR2F1	-	15	0.668	28.087	8.8297
chr20:29636384-29637010	-1.69	actc1a	-1.09	55755	chr20:29636966-29636980	M09881-NR2F1	-	15	0.632	28.087	8.8297
chr20:29636384-29637010	-1.69	actc1a	-1.09	55755	chr20:29636966-29636980	M09887-NR2F6	-	15	0.658	28.087	8.8297
chr20:29636384-29637010	-1.69	actc1a	-1.09	55755	chr20:29636966-29636980	M09889-NR2F6	-	15	0.640	28.087	8.8297
chr20:29636384-29637010	-1.69	actc1a	-1.09	55755	chr20:29636967-29636973	M03840-NR2F1	-	7	1.000	28.087	8.8297
chr20:29636384-29637010	-1.69	actc1a	-1.09	55755	chr20:29636967-29636974	M01984-NR2F6	-	8	0.925	28.087	8.8297
chr20:29636384-29637010	-1.69	actc1a	-1.09	55755	chr20:29636967-29636974	M05541-NR2F2	-	8	1.000	28.087	8.8297
chr20:29636384-29637010	-1.69	actc1a	-1.09	55755	chr20:29636967-29636975	M06477-NR2F1	-	9	1.000	28.087	8.8297
chr20:29636384-29637010	-1.69	actc1a	-1.09	55755	chr20:29636967-29636978	M06476-NR2F1	-	12	0.798	28.087	8.8297
chr20:29636384-29637010	-1.69	actc1a	-1.09	55755	chr20:29636967-29636980	M05957-NR2F6	-	14	0.684	28.087	8.8297
chr9:1704521-1704785	-1.37	hnrnpa3	5.51	2869	NA	NA	NA	NA	NA	28.087	11.0371
chr7:22501451-22501741	-1.37	LOC108190662	5.68	3274	chr7:22501557-22501564	M01984-NR2F6	-	8	0.753	28.087	11.0371
chr1:46845535-46845885	-1.37	sh3pxd2aa	3.49	8883	NA	NA	NA	NA	NA	28.087	11.0371
chr19:7664095-7664390	-1.37	s100a11	-2.71	12544	chr19:7664278-7664285	M05953-NR2F1	-	8	0.913	28.087	11.0371
chr19:7664095-7664390	-1.37	s100a11	-2.71	12544	chr19:7664279-7664285	M03840-NR2F1	-	7	0.807	28.087	11.0371
chr19:7664095-7664390	-1.37	s100a11	-2.71	12544	chr19:7664279-7664286	M01984-NR2F6	-	8	1.000	28.087	11.0371
chr19:7664095-7664390	-1.37	s100a11	-2.71	12544	chr19:7664279-7664286	M05541-NR2F2	-	8	0.627	28.087	11.0371
chr19:7664095-7664390	-1.37	s100a11	-2.71	12544	chr19:7664279-7664287	M06477-NR2F1	-	9	0.632	28.087	11.0371
chr7:22501451-22501741	-1.37	rbm4.1	1.52	28433	chr7:22501557-22501564	M01984-NR2F6	-	8	0.753	28.087	11.0371
chr7:73852774-73853049	-1.37	cldnd1a	6.03	42567	NA	NA	NA	NA	NA	28.087	11.0371
chr18:38428787-38429227	-1.37	alx4b	2.43	45334	NA	NA	NA	NA	NA	28.087	11.0371
chr19:7664095-7664390	-1.37	fam63a	6.32	104424	chr19:7664278-7664285	M05953-NR2F1	-	8	0.913	28.087	11.0371
chr19:7664095-7664390	-1.37	fam63a	6.32	104424	chr19:7664279-7664285	M03840-NR2F1	-	7	0.807	28.087	11.0371
chr19:7664095-7664390	-1.37	fam63a	6.32	104424	chr19:7664279-7664286	M01984-NR2F6	-	8	1.000	28.087	11.0371
chr19:7664095-7664390	-1.37	fam63a	6.32	104424	chr19:7664279-7664286	M05541-NR2F2	-	8	0.627	28.087	11.0371
chr19:7664095-7664390	-1.37	fam63a	6.32	104424	chr19:7664279-7664287	M06477-NR2F1	-	9	0.632	28.087	11.0371
chr19:7664095-7664390	-1.37	rab25a	5.51	162158	chr19:7664278-7664285	M05953-NR2F1	-	8	0.913	28.087	11.0371
chr19:7664095-7664390	-1.37	rab25a	5.51	162158	chr19:7664279-7664285	M03840-NR2F1	-	7	0.807	28.087	11.0371
chr19:7664095-7664390	-1.37	rab25a	5.51	162158	chr19:7664279-7664286	M01984-NR2F6	-	8	1.000	28.087	11.0371
chr19:7664095-7664390	-1.37	rab25a	5.51	162158	chr19:7664279-7664286	M05541-NR2F2	-	8	0.627	28.087	11.0371
chr19:7664095-7664390	-1.37	rab25a	5.51	162158	chr19:7664279-7664287	M06477-NR2F1	-	9	0.632	28.087	11.0371
chr19:7664095-7664390	-1.37	apoa1bp	3.42	170374	chr19:7664278-7664285	M05953-NR2F1	-	8	0.913	28.087	11.0371
chr19:7664095-7664390	-1.37	apoa1bp	3.42	170374	chr19:7664279-7664285	M03840-NR2F1	-	7	0.807	28.087	11.0371
chr19:7664095-7664390	-1.37	apoa1bp	3.42	170374	chr19:7664279-7664286	M01984-NR2F6	-	8	1.000	28.087	11.0371
chr19:7664095-7664390	-1.37	apoa1bp	3.42	170374	chr19:7664279-7664286	M05541-NR2F2	-	8	0.627	28.087	11.0371
chr19:7664095-7664390	-1.37	apoa1bp	3.42	170374	chr19:7664279-7664287	M06477-NR2F1	-	9	0.632	28.087	11.0371
chr19:7664095-7664390	-1.37	oxr1b	6.31	176114	chr19:7664278-7664285	M05953-NR2F1	-	8	0.913	28.087	11.0371
chr19:7664095-7664390	-1.37	oxr1b	6.31	176114	chr19:7664279-7664285	M03840-NR2F1	-	7	0.807	28.087	11.0371
chr19:7664095-7664390	-1.37	oxr1b	6.31	176114	chr19:7664279-7664286	M01984-NR2F6	-	8	1.000	28.087	11.0371
chr19:7664095-7664390	-1.37	oxr1b	6.31	176114	chr19:7664279-7664286	M05541-NR2F2	-	8	0.627	28.087	11.0371
chr19:7664095-7664390	-1.37	oxr1b	6.31	176114	chr19:7664279-7664287	M06477-NR2F1	-	9	0.632	28.087	11.0371
chr19:7664095-7664390	-1.37	cks1b	1.90	251710	chr19:7664278-7664285	M05953-NR2F1	-	8	0.913	28.087	11.0371
chr19:7664095-7664390	-1.37	cks1b	1.90	251710	chr19:7664279-7664285	M03840-NR2F1	-	7	0.807	28.087	11.0371
chr19:7664095-7664390	-1.37	cks1b	1.90	251710	chr19:7664279-7664286	M01984-NR2F6	-	8	1.000	28.087	11.0371
chr19:7664095-7664390	-1.37	cks1b	1.90	251710	chr19:7664279-7664286	M05541-NR2F2	-	8	0.627	28.087	11.0371
chr19:7664095-7664390	-1.37	cks1b	1.90	251710	chr19:7664279-7664287	M06477-NR2F1	-	9	0.632	28.087	11.0371
chr25:19057419-19057692	-1.23	mfge8b	-1.25	5905	NA	NA	NA	NA	NA	28.087	12.1408
chr4:8133804-8134100	-1.23	ninj2	-7.19	25850	NA	NA	NA	NA	NA	28.087	12.1408
chr17:6251114-6251460	-1.23	cenpo	4.49	119377	chr17:6251116-6251123	M05953-NR2F1	-	8	0.981	28.087	12.1408
chr17:6251114-6251460	-1.23	cenpo	4.49	119377	chr17:6251116-6251125	M06478-NR2F2	-	10	0.649	28.087	12.1408
chr17:6251114-6251460	-1.23	cenpo	4.49	119377	chr17:6251117-6251123	M03840-NR2F1	-	7	0.937	28.087	12.1408
chr17:6251114-6251460	-1.23	cenpo	4.49	119377	chr17:6251117-6251124	M01984-NR2F6	-	8	0.937	28.087	12.1408
chr17:6251114-6251460	-1.23	cenpo	4.49	119377	chr17:6251117-6251124	M05541-NR2F2	-	8	0.638	28.087	12.1408
chr17:6251114-6251460	-1.23	cenpo	4.49	119377	chr17:6251197-6251209	M02591-NR2F1	-	13	0.710	28.087	12.1408
chr17:6251114-6251460	-1.23	cenpo	4.49	119377	chr17:6251197-6251209	M05954-NR2F1	-	13	0.710	28.087	12.1408
chr17:6251114-6251460	-1.23	cenpo	4.49	119377	chr17:6251197-6251211	M03841-NR2F2	-	15	0.737	28.087	12.1408
chr17:6251114-6251460	-1.23	cenpo	4.49	119377	chr17:6251200-6251207	M05953-NR2F1	-	8	0.885	28.087	12.1408
chr17:6251114-6251460	-1.23	cenpo	4.49	119377	chr17:6251200-6251209	M06478-NR2F2	-	10	0.819	28.087	12.1408
chr17:6251114-6251460	-1.23	cenpo	4.49	119377	chr17:6251201-6251207	M03840-NR2F1	-	7	1.000	28.087	12.1408
chr17:6251114-6251460	-1.23	cenpo	4.49	119377	chr17:6251201-6251208	M01984-NR2F6	-	8	0.925	28.087	12.1408
chr17:6251114-6251460	-1.23	cenpo	4.49	119377	chr17:6251201-6251208	M05541-NR2F2	-	8	1.000	28.087	12.1408
chr17:6251114-6251460	-1.23	cenpo	4.49	119377	chr17:6251201-6251209	M06477-NR2F1	-	9	0.806	28.087	12.1408
chr17:6251114-6251460	-1.23	cenpo	4.49	119377	chr17:6251201-6251212	M06476-NR2F1	-	12	0.774	28.087	12.1408
chr5:23767132-23767682	-1.11	phf23a	-2.69	25732	NA	NA	NA	NA	NA	28.087	13.2446
chr18:16858037-16858487	-1.11	swap70b	-1.92	29280	NA	NA	NA	NA	NA	28.087	13.2446
chr11:42022657-42023105	-1.11	flnbl	5.59	38270	chr11:42023006-42023020	M03841-NR2F2	-	15	0.700	28.087	13.2446
chr11:42022657-42023105	-1.11	flnbl	5.59	38270	chr11:42023009-42023018	M06478-NR2F2	-	10	0.730	28.087	13.2446
chr11:42022657-42023105	-1.11	flnbl	5.59	38270	chr11:42023010-42023016	M03840-NR2F1	-	7	0.611	28.087	13.2446
chr11:42022657-42023105	-1.11	flnbl	5.59	38270	chr11:42023010-42023017	M05541-NR2F2	-	8	0.616	28.087	13.2446
chr11:42022657-42023105	-1.11	flnbl	5.59	38270	chr11:42023010-42023018	M06477-NR2F1	-	9	0.779	28.087	13.2446
chr11:42022657-42023105	-1.11	flnbl	5.59	38270	chr11:42023010-42023023	M03927-NR2F6	-	14	0.620	28.087	13.2446
chr18:16858037-16858487	-1.11	ampd3b	-2.50	51309	NA	NA	NA	NA	NA	28.087	13.2446
chr1:13397620-13397997	-1.11	elf2b	-1.06	94623	chr1:13397981-13397990	M05542-NR2F2	-	10	0.608	28.087	13.2446
chr18:16858037-16858487	-1.11	akip1	5.90	103171	NA	NA	NA	NA	NA	28.087	13.2446
chr18:16858037-16858487	-1.11	tbc1d15	2.84	154611	NA	NA	NA	NA	NA	28.087	13.2446
chr18:16858037-16858487	-1.11	chtf8	-1.58	173807	NA	NA	NA	NA	NA	28.087	13.2446
chr18:16858037-16858487	-1.11	tango6	5.59	195978	NA	NA	NA	NA	NA	28.087	13.2446
chr17:45233039-45233492	1.11	capn3a	-7.38	93626	chr17:45233053-45233067	M06479-NR2F2	-	15	0.617	27.181	59.6005
chr17:45233039-45233492	1.11	capn3a	-7.38	93626	chr17:45233055-45233064	M05542-NR2F2	-	10	0.755	27.181	59.6005
chr17:45233039-45233492	1.11	capn3a	-7.38	93626	chr17:45233075-45233089	M06479-NR2F2	-	15	0.613	27.181	59.6005
chr17:45233039-45233492	1.11	capn3a	-7.38	93626	chr17:45233147-45233156	M05542-NR2F2	-	10	0.755	27.181	59.6005
chr17:45233039-45233492	1.11	capn3a	-7.38	93626	chr17:45233167-45233181	M06479-NR2F2	-	15	0.613	27.181	59.6005
chr17:45233039-45233492	1.11	capn3a	-7.38	93626	chr17:45233259-45233273	M06479-NR2F2	-	15	0.613	27.181	59.6005
chr17:45233039-45233492	1.11	capn3a	-7.38	93626	chr17:45233351-45233365	M06479-NR2F2	-	15	0.613	27.181	59.6005
chr17:45233039-45233492	1.11	capn3a	-7.38	93626	chr17:45233423-45233432	M05542-NR2F2	-	10	0.755	27.181	59.6005
chr17:45233039-45233492	1.11	capn3a	-7.38	93626	chr17:45233443-45233457	M06479-NR2F2	-	15	0.613	27.181	59.6005
chr21:40469749-40470101	-2.06	ssh2b	3.92	15016	chr21:40469861-40469867	M03840-NR2F1	-	7	0.636	27.181	6.62228
chr21:40469749-40470101	-2.06	ssh2b	3.92	15016	chr21:40469861-40469868	M05541-NR2F2	-	8	0.793	27.181	6.62228
chr2:36999480-36999976	-1.84	gng7	5.59	7862	NA	NA	NA	NA	NA	27.181	7.72599
chr12:49165094-49165348	-1.84	bub3	2.06	27954	NA	NA	NA	NA	NA	27.181	7.72599
chr12:49165094-49165348	-1.84	acadsb	-1.50	39052	NA	NA	NA	NA	NA	27.181	7.72599
chr12:49165094-49165348	-1.84	LOC103911967	5.18	47098	NA	NA	NA	NA	NA	27.181	7.72599
chr13:25410189-25410465	-1.64	mcmbp	3.68	112	chr13:25410190-25410198	M06477-NR2F1	-	9	0.643	27.181	8.8297
chr13:25410189-25410465	-1.64	mcmbp	3.68	112	chr13:25410248-25410255	M01984-NR2F6	-	8	0.732	27.181	8.8297
chr13:25410189-25410465	-1.64	mcmbp	3.68	112	chr13:25410266-25410272	M03840-NR2F1	-	7	0.636	27.181	8.8297
chr13:25410189-25410465	-1.64	mcmbp	3.68	112	chr13:25410266-25410273	M05541-NR2F2	-	8	0.608	27.181	8.8297
chr13:25410189-25410465	-1.64	sec23ip	-1.70	8509	chr13:25410190-25410198	M06477-NR2F1	-	9	0.643	27.181	8.8297
chr13:25410189-25410465	-1.64	sec23ip	-1.70	8509	chr13:25410248-25410255	M01984-NR2F6	-	8	0.732	27.181	8.8297
chr13:25410189-25410465	-1.64	sec23ip	-1.70	8509	chr13:25410266-25410272	M03840-NR2F1	-	7	0.636	27.181	8.8297
chr13:25410189-25410465	-1.64	sec23ip	-1.70	8509	chr13:25410266-25410273	M05541-NR2F2	-	8	0.608	27.181	8.8297
chr6:42003529-42003811	-1.47	cav3	-1.15	2078	NA	NA	NA	NA	NA	27.181	9.93341
chr23:5602044-5602323	-1.47	tead3a	3.92	6859	chr23:5602141-5602148	M05541-NR2F2	-	8	0.763	27.181	9.93341
chr20:37659050-37659545	-1.47	hivep2a	-1.57	14191	NA	NA	NA	NA	NA	27.181	9.93341
chr23:44212159-44212958	-1.47	tec	6.37	36714	NA	NA	NA	NA	NA	27.181	9.93341
chr6:42003529-42003811	-1.47	parp3	-3.48	37011	NA	NA	NA	NA	NA	27.181	9.93341
chr1:59931-60196	-1.47	cep97	5.51	43559	NA	NA	NA	NA	NA	27.181	9.93341
chr1:59931-60196	-1.47	rpl24	-1.12	48054	NA	NA	NA	NA	NA	27.181	9.93341
chr8:25731868-25732161	-1.32	suv39h1b	3.56	0	chr8:25731943-25731949	M03840-NR2F1	-	7	0.672	27.181	11.0371
chr8:25731868-25732161	-1.32	suv39h1b	3.56	0	chr8:25731943-25731950	M05541-NR2F2	-	8	0.770	27.181	11.0371
chr8:25731868-25732161	-1.32	suv39h1b	3.56	0	chr8:25732083-25732090	M01984-NR2F6	-	8	0.734	27.181	11.0371
chr8:25731868-25732161	-1.32	suv39h1b	3.56	0	chr8:25732112-25732119	M05953-NR2F1	-	8	0.904	27.181	11.0371
chr8:25731868-25732161	-1.32	suv39h1b	3.56	0	chr8:25732113-25732119	M03840-NR2F1	-	7	0.870	27.181	11.0371
chr8:25731868-25732161	-1.32	suv39h1b	3.56	0	chr8:25732113-25732120	M01984-NR2F6	-	8	0.933	27.181	11.0371
chr6:23341131-23341592	-1.32	stx8	-2.16	9873	NA	NA	NA	NA	NA	27.181	11.0371
chr8:25731868-25732161	-1.32	tmem9	5.90	10322	chr8:25731943-25731949	M03840-NR2F1	-	7	0.672	27.181	11.0371
chr8:25731868-25732161	-1.32	tmem9	5.90	10322	chr8:25731943-25731950	M05541-NR2F2	-	8	0.770	27.181	11.0371
chr8:25731868-25732161	-1.32	tmem9	5.90	10322	chr8:25732083-25732090	M01984-NR2F6	-	8	0.734	27.181	11.0371
chr8:25731868-25732161	-1.32	tmem9	5.90	10322	chr8:25732112-25732119	M05953-NR2F1	-	8	0.904	27.181	11.0371
chr8:25731868-25732161	-1.32	tmem9	5.90	10322	chr8:25732113-25732119	M03840-NR2F1	-	7	0.870	27.181	11.0371
chr8:25731868-25732161	-1.32	tmem9	5.90	10322	chr8:25732113-25732120	M01984-NR2F6	-	8	0.933	27.181	11.0371
chr9:22914367-22914835	-1.32	itgb5	-3.94	10853	chr9:22914759-22914767	M06477-NR2F1	-	9	0.639	27.181	11.0371
chr12:33675921-33676361	-1.32	peo1	6.51	28993	chr12:33676106-33676113	M05953-NR2F1	-	8	0.750	27.181	11.0371
chr12:33675921-33676361	-1.32	peo1	6.51	28993	chr12:33676107-33676113	M03840-NR2F1	-	7	0.798	27.181	11.0371
chr12:33675921-33676361	-1.32	peo1	6.51	28993	chr12:33676107-33676114	M01984-NR2F6	-	8	0.848	27.181	11.0371
chr1:17850542-17850802	-1.32	fam114a1	5.68	31992	NA	NA	NA	NA	NA	27.181	11.0371
chr9:22914367-22914835	-1.32	tnfaip6	3.72	38531	chr9:22914759-22914767	M06477-NR2F1	-	9	0.639	27.181	11.0371
chr22:5169990-5170356	-1.32	LOC100150882	3.12	74929	NA	NA	NA	NA	NA	27.181	11.0371
chr13:36377272-36377631	-1.32	cnih1	1.33	92168	NA	NA	NA	NA	NA	27.181	11.0371
chr1:17850542-17850802	-1.32	tbc1d1	5.83	102653	NA	NA	NA	NA	NA	27.181	11.0371
chr20:6281796-6282482	-1.18	trappc8	-1.91	0	chr20:6282097-6282103	M03840-NR2F1	-	7	0.674	27.181	12.1408
chr4:19829506-19829809	-1.18	cacna2d1a	-1.09	3901	NA	NA	NA	NA	NA	27.181	12.1408
chr13:24413652-24414032	-1.18	sertad2b	-2.05	19558	NA	NA	NA	NA	NA	27.181	12.1408
chr13:24413652-24414032	-1.18	fuom	-2.66	37897	NA	NA	NA	NA	NA	27.181	12.1408
chr6:50445387-50445779	-1.18	romo1	-1.00	39832	chr6:50445691-50445705	M06479-NR2F2	-	15	0.757	27.181	12.1408
chr6:50445387-50445779	-1.18	romo1	-1.00	39832	chr6:50445693-50445702	M05542-NR2F2	-	10	0.805	27.181	12.1408
chr22:22470055-22470429	-1.18	nr5a2	6.03	138142	chr22:22470151-22470158	M05953-NR2F1	-	8	0.750	27.181	12.1408
chr22:22470055-22470429	-1.18	nr5a2	6.03	138142	chr22:22470152-22470158	M03840-NR2F1	-	7	0.798	27.181	12.1408
chr22:22470055-22470429	-1.18	nr5a2	6.03	138142	chr22:22470152-22470159	M01984-NR2F6	-	8	0.851	27.181	12.1408
chr22:22470055-22470429	-1.18	nr5a2	6.03	138142	chr22:22470156-22470168	M02591-NR2F1	-	13	0.777	27.181	12.1408
chr22:22470055-22470429	-1.18	nr5a2	6.03	138142	chr22:22470156-22470168	M05954-NR2F1	-	13	0.777	27.181	12.1408
chr22:22470055-22470429	-1.18	nr5a2	6.03	138142	chr22:22470159-22470166	M05953-NR2F1	-	8	0.921	27.181	12.1408
chr22:22470055-22470429	-1.18	nr5a2	6.03	138142	chr22:22470159-22470168	M06478-NR2F2	-	10	0.764	27.181	12.1408
chr22:22470055-22470429	-1.18	nr5a2	6.03	138142	chr22:22470160-22470166	M03840-NR2F1	-	7	0.807	27.181	12.1408
chr22:22470055-22470429	-1.18	nr5a2	6.03	138142	chr22:22470160-22470167	M01984-NR2F6	-	8	1.000	27.181	12.1408
chr22:22470055-22470429	-1.18	nr5a2	6.03	138142	chr22:22470160-22470167	M05541-NR2F2	-	8	0.627	27.181	12.1408
chr22:22470055-22470429	-1.18	nr5a2	6.03	138142	chr22:22470160-22470168	M06477-NR2F1	-	9	0.754	27.181	12.1408
chr22:22470055-22470429	-1.18	nr5a2	6.03	138142	chr22:22470160-22470171	M06476-NR2F1	-	12	0.695	27.181	12.1408
chr22:22470055-22470429	-1.18	nr5a2	6.03	138142	chr22:22470174-22470188	M09875-NR2F1	-	15	0.735	27.181	12.1408
chr22:22470055-22470429	-1.18	nr5a2	6.03	138142	chr22:22470174-22470188	M09877-NR2F1	-	15	0.720	27.181	12.1408
chr22:22470055-22470429	-1.18	nr5a2	6.03	138142	chr22:22470174-22470188	M09879-NR2F1	-	15	0.675	27.181	12.1408
chr22:22470055-22470429	-1.18	nr5a2	6.03	138142	chr22:22470174-22470188	M09881-NR2F1	-	15	0.720	27.181	12.1408
chr22:22470055-22470429	-1.18	nr5a2	6.03	138142	chr22:22470174-22470188	M09887-NR2F6	-	15	0.783	27.181	12.1408
chr22:22470055-22470429	-1.18	nr5a2	6.03	138142	chr22:22470174-22470188	M09889-NR2F6	-	15	0.802	27.181	12.1408
chr22:22470055-22470429	-1.18	nr5a2	6.03	138142	chr22:22470175-22470182	M05541-NR2F2	-	8	0.653	27.181	12.1408
chr22:22470055-22470429	-1.18	nr5a2	6.03	138142	chr22:22470175-22470186	M06476-NR2F1	-	12	0.655	27.181	12.1408
chr22:22470055-22470429	-1.18	nr5a2	6.03	138142	chr22:22470175-22470188	M03927-NR2F6	-	14	0.810	27.181	12.1408
chr22:22470055-22470429	-1.18	nr5a2	6.03	138142	chr22:22470175-22470188	M05957-NR2F6	-	14	0.656	27.181	12.1408
chr22:22470055-22470429	-1.18	nr5a2	6.03	138142	chr22:22470177-22470194	M06693-NR2F6	-	18	0.785	27.181	12.1408
chr22:22470055-22470429	-1.18	nr5a2	6.03	138142	chr22:22470178-22470190	M02591-NR2F1	-	13	0.883	27.181	12.1408
chr22:22470055-22470429	-1.18	nr5a2	6.03	138142	chr22:22470178-22470190	M05954-NR2F1	-	13	0.883	27.181	12.1408
chr22:22470055-22470429	-1.18	nr5a2	6.03	138142	chr22:22470178-22470192	M03841-NR2F2	-	15	0.925	27.181	12.1408
chr22:22470055-22470429	-1.18	nr5a2	6.03	138142	chr22:22470181-22470188	M05953-NR2F1	-	8	0.806	27.181	12.1408
chr22:22470055-22470429	-1.18	nr5a2	6.03	138142	chr22:22470181-22470190	M06478-NR2F2	-	10	0.953	27.181	12.1408
chr22:22470055-22470429	-1.18	nr5a2	6.03	138142	chr22:22470181-22470195	M05951-NR2F1	-	15	0.670	27.181	12.1408
chr22:22470055-22470429	-1.18	nr5a2	6.03	138142	chr22:22470181-22470195	M09875-NR2F1	-	15	0.766	27.181	12.1408
chr22:22470055-22470429	-1.18	nr5a2	6.03	138142	chr22:22470181-22470195	M09877-NR2F1	-	15	0.759	27.181	12.1408
chr22:22470055-22470429	-1.18	nr5a2	6.03	138142	chr22:22470181-22470195	M09879-NR2F1	-	15	0.733	27.181	12.1408
chr22:22470055-22470429	-1.18	nr5a2	6.03	138142	chr22:22470181-22470195	M09881-NR2F1	-	15	0.751	27.181	12.1408
chr22:22470055-22470429	-1.18	nr5a2	6.03	138142	chr22:22470181-22470195	M09883-NR2F6	-	15	0.634	27.181	12.1408
chr22:22470055-22470429	-1.18	nr5a2	6.03	138142	chr22:22470181-22470195	M09885-NR2F6	-	15	0.673	27.181	12.1408
chr22:22470055-22470429	-1.18	nr5a2	6.03	138142	chr22:22470181-22470195	M09887-NR2F6	-	15	0.806	27.181	12.1408
chr22:22470055-22470429	-1.18	nr5a2	6.03	138142	chr22:22470181-22470195	M09889-NR2F6	-	15	0.804	27.181	12.1408
chr22:22470055-22470429	-1.18	nr5a2	6.03	138142	chr22:22470182-22470188	M03840-NR2F1	-	7	1.000	27.181	12.1408
chr22:22470055-22470429	-1.18	nr5a2	6.03	138142	chr22:22470182-22470189	M01984-NR2F6	-	8	0.925	27.181	12.1408
chr22:22470055-22470429	-1.18	nr5a2	6.03	138142	chr22:22470182-22470189	M05541-NR2F2	-	8	1.000	27.181	12.1408
chr22:22470055-22470429	-1.18	nr5a2	6.03	138142	chr22:22470182-22470190	M06477-NR2F1	-	9	1.000	27.181	12.1408
chr22:22470055-22470429	-1.18	nr5a2	6.03	138142	chr22:22470182-22470193	M06476-NR2F1	-	12	0.958	27.181	12.1408
chr22:22470055-22470429	-1.18	nr5a2	6.03	138142	chr22:22470182-22470195	M03927-NR2F6	-	14	0.979	27.181	12.1408
chr22:22470055-22470429	-1.18	nr5a2	6.03	138142	chr22:22470182-22470195	M05956-NR2F6	-	14	0.635	27.181	12.1408
chr22:22470055-22470429	-1.18	nr5a2	6.03	138142	chr22:22470182-22470195	M05957-NR2F6	-	14	0.783	27.181	12.1408
chr1:51860717-51860988	-1.06	acy3.2	2.28	0	NA	NA	NA	NA	NA	27.181	13.2446
chr6:47822782-47823133	-1.06	lrig2	2.36	0	NA	NA	NA	NA	NA	27.181	13.2446
chr8:25584508-25584827	-1.06	stk38a	5.97	1505	NA	NA	NA	NA	NA	27.181	13.2446
chr3:16076913-16077150	-1.06	rpl19	-1.12	2993	NA	NA	NA	NA	NA	27.181	13.2446
chr9:1976542-1976975	-1.06	hoxd10a	-1.67	7293	NA	NA	NA	NA	NA	27.181	13.2446
chr24:39726265-39726489	-1.06	kiaa0556	3.82	10652	NA	NA	NA	NA	NA	27.181	13.2446
chr23:29554931-29555422	-1.06	kif1b	-1.64	12166	chr23:29554991-29554998	M05953-NR2F1	-	8	0.765	27.181	13.2446
chr23:29554931-29555422	-1.06	kif1b	-1.64	12166	chr23:29554991-29555000	M06478-NR2F2	-	10	0.766	27.181	13.2446
chr23:29554931-29555422	-1.06	kif1b	-1.64	12166	chr23:29554992-29554998	M03840-NR2F1	-	7	0.859	27.181	13.2446
chr23:29554931-29555422	-1.06	kif1b	-1.64	12166	chr23:29554992-29554999	M01984-NR2F6	-	8	0.836	27.181	13.2446
chr23:29554931-29555422	-1.06	kif1b	-1.64	12166	chr23:29554992-29554999	M05541-NR2F2	-	8	0.655	27.181	13.2446
chr23:29554931-29555422	-1.06	kif1b	-1.64	12166	chr23:29554992-29555000	M06477-NR2F1	-	9	0.798	27.181	13.2446
chr23:29554931-29555422	-1.06	kif1b	-1.64	12166	chr23:29554992-29555003	M06476-NR2F1	-	12	0.614	27.181	13.2446
chr23:29554931-29555422	-1.06	kif1b	-1.64	12166	chr23:29554991-29554998	M05953-NR2F1	-	8	0.765	27.181	13.2446
chr23:29554931-29555422	-1.06	kif1b	-1.64	12166	chr23:29554991-29555000	M06478-NR2F2	-	10	0.766	27.181	13.2446
chr23:29554931-29555422	-1.06	kif1b	-1.64	12166	chr23:29554992-29554998	M03840-NR2F1	-	7	0.859	27.181	13.2446
chr23:29554931-29555422	-1.06	kif1b	-1.64	12166	chr23:29554992-29554999	M01984-NR2F6	-	8	0.836	27.181	13.2446
chr23:29554931-29555422	-1.06	kif1b	-1.64	12166	chr23:29554992-29554999	M05541-NR2F2	-	8	0.655	27.181	13.2446
chr23:29554931-29555422	-1.06	kif1b	-1.64	12166	chr23:29554992-29555000	M06477-NR2F1	-	9	0.798	27.181	13.2446
chr23:29554931-29555422	-1.06	kif1b	-1.64	12166	chr23:29554992-29555003	M06476-NR2F1	-	12	0.614	27.181	13.2446
chr20:48644402-48645015	-1.06	prep	7.00	12774	NA	NA	NA	NA	NA	27.181	13.2446
chr3:16076913-16077150	-1.06	bckdhbl	-2.12	14185	NA	NA	NA	NA	NA	27.181	13.2446
chr24:39726265-39726489	-1.06	luc7l	1.92	24215	NA	NA	NA	NA	NA	27.181	13.2446
chr9:1976542-1976975	-1.06	lnpa	3.06	43049	NA	NA	NA	NA	NA	27.181	13.2446
chr1:51860717-51860988	-1.06	abca1a	-1.32	64818	NA	NA	NA	NA	NA	27.181	13.2446
chr18:7812445-7812919	-1.06	rabl2	3.62	121520	chr18:7812456-7812462	M03840-NR2F1	-	7	0.636	27.181	13.2446
chr18:7812445-7812919	-1.06	rabl2	3.62	121520	chr18:7812499-7812506	M05541-NR2F2	-	8	0.653	27.181	13.2446
chr7:7207839-7208508	1.29	six7	6.83	21023	NA	NA	NA	NA	NA	26.275	65.1191
chr12:17590455-17590783	-2.01	pvalb2	-1.13	0	NA	NA	NA	NA	NA	26.275	6.62228
chr12:17590455-17590783	-2.01	pvalb3	-1.17	4813	NA	NA	NA	NA	NA	26.275	6.62228
chr12:17590455-17590783	-2.01	pvalb9	-3.39	14018	NA	NA	NA	NA	NA	26.275	6.62228
chr25:24104141-24105167	-2.01	spty2d1	2.68	34513	NA	NA	NA	NA	NA	26.275	6.62228
chr2:39630776-39631220	-1.79	spsb4a	6.83	11263	chr2:39631045-39631052	M05953-NR2F1	-	8	0.705	26.275	7.72599
chr2:39630776-39631220	-1.79	spsb4a	6.83	11263	chr2:39631046-39631052	M03840-NR2F1	-	7	0.729	26.275	7.72599
chr2:39630776-39631220	-1.79	spsb4a	6.83	11263	chr2:39631046-39631053	M01984-NR2F6	-	8	0.843	26.275	7.72599
chr25:3700684-3701003	-1.79	pddc1	5.60	17709	chr25:3700973-3700982	M06478-NR2F2	-	10	0.618	26.275	7.72599
chr25:3700684-3701003	-1.79	pddc1	5.60	17709	chr25:3700974-3700980	M03840-NR2F1	-	7	0.611	26.275	7.72599
chr25:3700684-3701003	-1.79	pddc1	5.60	17709	chr25:3700974-3700981	M05541-NR2F2	-	8	0.616	26.275	7.72599
chr25:3700684-3701003	-1.79	pddc1	5.60	17709	chr25:3700974-3700982	M06477-NR2F1	-	9	0.656	26.275	7.72599
chr6:12702401-12702720	-1.79	ical1	-5.33	37045	chr6:12702528-12702535	M05541-NR2F2	-	8	0.706	26.275	7.72599
chr6:12702401-12702720	-1.79	ical1	-5.33	37045	chr6:12702616-12702622	M03840-NR2F1	-	7	0.636	26.275	7.72599
chr6:12702401-12702720	-1.79	ical1	-5.33	37045	chr6:12702616-12702623	M05541-NR2F2	-	8	0.793	26.275	7.72599
chr3:42966157-42966591	-1.79	zc3h7a	3.97	106861	chr3:42966401-42966407	M03840-NR2F1	-	7	0.672	26.275	7.72599
chr23:19577104-19577451	-1.59	asb14b	1.78	0	chr23:19577248-19577255	M05953-NR2F1	-	8	0.784	26.275	8.8297
chr23:19577104-19577451	-1.59	asb14b	1.78	0	chr23:19577249-19577255	M03840-NR2F1	-	7	0.729	26.275	8.8297
chr23:19577104-19577451	-1.59	asb14b	1.78	0	chr23:19577249-19577256	M01984-NR2F6	-	8	0.843	26.275	8.8297
chr23:19577104-19577451	-1.59	asb14b	1.78	0	chr23:19577302-19577309	M05953-NR2F1	-	8	0.670	26.275	8.8297
chr23:19577104-19577451	-1.59	asb14b	1.78	0	chr23:19577302-19577311	M06478-NR2F2	-	10	0.646	26.275	8.8297
chr23:19577104-19577451	-1.59	asb14b	1.78	0	chr23:19577303-19577309	M03840-NR2F1	-	7	0.798	26.275	8.8297
chr23:19577104-19577451	-1.59	asb14b	1.78	0	chr23:19577303-19577310	M01984-NR2F6	-	8	0.848	26.275	8.8297
chr12:4662685-4663016	-1.59	kansl1a	2.39	6029	chr12:4662879-4662891	M02591-NR2F1	-	13	0.784	26.275	8.8297
chr12:4662685-4663016	-1.59	kansl1a	2.39	6029	chr12:4662879-4662891	M05954-NR2F1	-	13	0.784	26.275	8.8297
chr12:4662685-4663016	-1.59	kansl1a	2.39	6029	chr12:4662879-4662893	M03841-NR2F2	-	15	0.669	26.275	8.8297
chr12:4662685-4663016	-1.59	kansl1a	2.39	6029	chr12:4662882-4662889	M05953-NR2F1	-	8	0.981	26.275	8.8297
chr12:4662685-4663016	-1.59	kansl1a	2.39	6029	chr12:4662882-4662891	M06478-NR2F2	-	10	0.932	26.275	8.8297
chr12:4662685-4663016	-1.59	kansl1a	2.39	6029	chr12:4662883-4662889	M03840-NR2F1	-	7	0.937	26.275	8.8297
chr12:4662685-4663016	-1.59	kansl1a	2.39	6029	chr12:4662883-4662890	M01984-NR2F6	-	8	0.965	26.275	8.8297
chr12:4662685-4663016	-1.59	kansl1a	2.39	6029	chr12:4662883-4662890	M05541-NR2F2	-	8	0.860	26.275	8.8297
chr12:4662685-4663016	-1.59	kansl1a	2.39	6029	chr12:4662883-4662891	M06477-NR2F1	-	9	0.891	26.275	8.8297
chr12:4662685-4663016	-1.59	kansl1a	2.39	6029	chr12:4662883-4662894	M06476-NR2F1	-	12	0.757	26.275	8.8297
chr12:4662685-4663016	-1.59	kansl1a	2.39	6029	chr12:4662916-4662924	M06477-NR2F1	-	9	0.643	26.275	8.8297
chr23:19577104-19577451	-1.59	atp6ap1lb	5.90	60600	chr23:19577248-19577255	M05953-NR2F1	-	8	0.784	26.275	8.8297
chr23:19577104-19577451	-1.59	atp6ap1lb	5.90	60600	chr23:19577249-19577255	M03840-NR2F1	-	7	0.729	26.275	8.8297
chr23:19577104-19577451	-1.59	atp6ap1lb	5.90	60600	chr23:19577249-19577256	M01984-NR2F6	-	8	0.843	26.275	8.8297
chr23:19577104-19577451	-1.59	atp6ap1lb	5.90	60600	chr23:19577302-19577309	M05953-NR2F1	-	8	0.670	26.275	8.8297
chr23:19577104-19577451	-1.59	atp6ap1lb	5.90	60600	chr23:19577302-19577311	M06478-NR2F2	-	10	0.646	26.275	8.8297
chr23:19577104-19577451	-1.59	atp6ap1lb	5.90	60600	chr23:19577303-19577309	M03840-NR2F1	-	7	0.798	26.275	8.8297
chr23:19577104-19577451	-1.59	atp6ap1lb	5.90	60600	chr23:19577303-19577310	M01984-NR2F6	-	8	0.848	26.275	8.8297
chr12:4662685-4663016	-1.59	prr12a	2.14	65399	chr12:4662879-4662891	M02591-NR2F1	-	13	0.784	26.275	8.8297
chr12:4662685-4663016	-1.59	prr12a	2.14	65399	chr12:4662879-4662891	M05954-NR2F1	-	13	0.784	26.275	8.8297
chr12:4662685-4663016	-1.59	prr12a	2.14	65399	chr12:4662879-4662893	M03841-NR2F2	-	15	0.669	26.275	8.8297
chr12:4662685-4663016	-1.59	prr12a	2.14	65399	chr12:4662882-4662889	M05953-NR2F1	-	8	0.981	26.275	8.8297
chr12:4662685-4663016	-1.59	prr12a	2.14	65399	chr12:4662882-4662891	M06478-NR2F2	-	10	0.932	26.275	8.8297
chr12:4662685-4663016	-1.59	prr12a	2.14	65399	chr12:4662883-4662889	M03840-NR2F1	-	7	0.937	26.275	8.8297
chr12:4662685-4663016	-1.59	prr12a	2.14	65399	chr12:4662883-4662890	M01984-NR2F6	-	8	0.965	26.275	8.8297
chr12:4662685-4663016	-1.59	prr12a	2.14	65399	chr12:4662883-4662890	M05541-NR2F2	-	8	0.860	26.275	8.8297
chr12:4662685-4663016	-1.59	prr12a	2.14	65399	chr12:4662883-4662891	M06477-NR2F1	-	9	0.891	26.275	8.8297
chr12:4662685-4663016	-1.59	prr12a	2.14	65399	chr12:4662883-4662894	M06476-NR2F1	-	12	0.757	26.275	8.8297
chr12:4662685-4663016	-1.59	prr12a	2.14	65399	chr12:4662916-4662924	M06477-NR2F1	-	9	0.643	26.275	8.8297
chr23:19577104-19577451	-1.59	slmapb	6.31	86271	chr23:19577248-19577255	M05953-NR2F1	-	8	0.784	26.275	8.8297
chr23:19577104-19577451	-1.59	slmapb	6.31	86271	chr23:19577249-19577255	M03840-NR2F1	-	7	0.729	26.275	8.8297
chr23:19577104-19577451	-1.59	slmapb	6.31	86271	chr23:19577249-19577256	M01984-NR2F6	-	8	0.843	26.275	8.8297
chr23:19577104-19577451	-1.59	slmapb	6.31	86271	chr23:19577302-19577309	M05953-NR2F1	-	8	0.670	26.275	8.8297
chr23:19577104-19577451	-1.59	slmapb	6.31	86271	chr23:19577302-19577311	M06478-NR2F2	-	10	0.646	26.275	8.8297
chr23:19577104-19577451	-1.59	slmapb	6.31	86271	chr23:19577303-19577309	M03840-NR2F1	-	7	0.798	26.275	8.8297
chr23:19577104-19577451	-1.59	slmapb	6.31	86271	chr23:19577303-19577310	M01984-NR2F6	-	8	0.848	26.275	8.8297
chr18:18321853-18322298	-1.59	n4bp1	-1.51	94669	chr18:18321947-18321961	M09889-NR2F6	-	15	0.632	26.275	8.8297
chr23:19577104-19577451	-1.59	dnase1l3	-1.78	197843	chr23:19577248-19577255	M05953-NR2F1	-	8	0.784	26.275	8.8297
chr23:19577104-19577451	-1.59	dnase1l3	-1.78	197843	chr23:19577249-19577255	M03840-NR2F1	-	7	0.729	26.275	8.8297
chr23:19577104-19577451	-1.59	dnase1l3	-1.78	197843	chr23:19577249-19577256	M01984-NR2F6	-	8	0.843	26.275	8.8297
chr23:19577104-19577451	-1.59	dnase1l3	-1.78	197843	chr23:19577302-19577309	M05953-NR2F1	-	8	0.670	26.275	8.8297
chr23:19577104-19577451	-1.59	dnase1l3	-1.78	197843	chr23:19577302-19577311	M06478-NR2F2	-	10	0.646	26.275	8.8297
chr23:19577104-19577451	-1.59	dnase1l3	-1.78	197843	chr23:19577303-19577309	M03840-NR2F1	-	7	0.798	26.275	8.8297
chr23:19577104-19577451	-1.59	dnase1l3	-1.78	197843	chr23:19577303-19577310	M01984-NR2F6	-	8	0.848	26.275	8.8297
chr23:19577104-19577451	-1.59	rpl10	-1.00	208762	chr23:19577248-19577255	M05953-NR2F1	-	8	0.784	26.275	8.8297
chr23:19577104-19577451	-1.59	rpl10	-1.00	208762	chr23:19577249-19577255	M03840-NR2F1	-	7	0.729	26.275	8.8297
chr23:19577104-19577451	-1.59	rpl10	-1.00	208762	chr23:19577249-19577256	M01984-NR2F6	-	8	0.843	26.275	8.8297
chr23:19577104-19577451	-1.59	rpl10	-1.00	208762	chr23:19577302-19577309	M05953-NR2F1	-	8	0.670	26.275	8.8297
chr23:19577104-19577451	-1.59	rpl10	-1.00	208762	chr23:19577302-19577311	M06478-NR2F2	-	10	0.646	26.275	8.8297
chr23:19577104-19577451	-1.59	rpl10	-1.00	208762	chr23:19577303-19577309	M03840-NR2F1	-	7	0.798	26.275	8.8297
chr23:19577104-19577451	-1.59	rpl10	-1.00	208762	chr23:19577303-19577310	M01984-NR2F6	-	8	0.848	26.275	8.8297
chr3:32037276-32037640	-1.43	tnnt1	-1.62	5	NA	NA	NA	NA	NA	26.275	9.93341
chr2:2634073-2634402	-1.43	myl13	-1.06	79	chr2:2634359-2634366	M05541-NR2F2	-	8	0.740	26.275	9.93341
chr12:30105386-30105690	-1.43	ablim1b	-8.02	3417	chr12:30105604-30105611	M05953-NR2F1	-	8	0.817	26.275	9.93341
chr12:30105386-30105690	-1.43	ablim1b	-8.02	3417	chr12:30105605-30105611	M03840-NR2F1	-	7	0.870	26.275	9.93341
chr12:30105386-30105690	-1.43	ablim1b	-8.02	3417	chr12:30105605-30105612	M01984-NR2F6	-	8	0.951	26.275	9.93341
chr14:47485691-47486053	-1.43	fgfbp2a	3.90	21510	chr14:47485863-47485870	M01984-NR2F6	-	8	0.812	26.275	9.93341
chr2:44924382-44924717	-1.43	acsm3	-8.66	30534	NA	NA	NA	NA	NA	26.275	9.93341
chr2:44924382-44924717	-1.43	map6d1	5.59	56585	NA	NA	NA	NA	NA	26.275	9.93341
chr16:3088949-3089184	-1.43	cyb5r4	6.68	81578	chr16:3089007-3089016	M06478-NR2F2	-	10	0.611	26.275	9.93341
chr16:3088949-3089184	-1.43	cyb5r4	6.68	81578	chr16:3089008-3089016	M06477-NR2F1	-	9	0.639	26.275	9.93341
chr19:106627-106911	-1.27	adgrb1b	6.26	0	NA	NA	NA	NA	NA	26.275	11.0371
chr19:32898858-32899202	-1.27	gmpr	1.41	798	NA	NA	NA	NA	NA	26.275	11.0371
chr19:32898858-32899202	-1.27	fuca1.2	3.87	2274	NA	NA	NA	NA	NA	26.275	11.0371
chr22:29777237-29777942	-1.27	rbm20	-1.21	5204	chr22:29777815-29777824	M05542-NR2F2	-	10	0.609	26.275	11.0371
chr22:29777237-29777942	-1.27	rbm20	-1.21	5204	chr22:29777914-29777920	M03840-NR2F1	-	7	0.672	26.275	11.0371
chr22:29777237-29777942	-1.27	rbm20	-1.21	5204	chr22:29777914-29777921	M05541-NR2F2	-	8	0.770	26.275	11.0371
chr22:29777237-29777942	-1.27	rbm20	-1.21	5204	chr22:29777914-29777922	M06477-NR2F1	-	9	0.653	26.275	11.0371
chr9:13916094-13916692	-1.27	raph1a	3.82	5984	chr9:13916460-13916467	M05541-NR2F2	-	8	0.688	26.275	11.0371
chr19:32898858-32899202	-1.27	fuca1.1	-1.40	9097	NA	NA	NA	NA	NA	26.275	11.0371
chr25:30870433-30870853	-1.27	tnnt3a	-1.06	29453	NA	NA	NA	NA	NA	26.275	11.0371
chr1:46215008-46215382	-1.27	agpat3	-1.60	30741	NA	NA	NA	NA	NA	26.275	11.0371
chr22:29777237-29777942	-1.27	pdcd4b	3.23	36435	chr22:29777815-29777824	M05542-NR2F2	-	10	0.609	26.275	11.0371
chr22:29777237-29777942	-1.27	pdcd4b	3.23	36435	chr22:29777914-29777920	M03840-NR2F1	-	7	0.672	26.275	11.0371
chr22:29777237-29777942	-1.27	pdcd4b	3.23	36435	chr22:29777914-29777921	M05541-NR2F2	-	8	0.770	26.275	11.0371
chr22:29777237-29777942	-1.27	pdcd4b	3.23	36435	chr22:29777914-29777922	M06477-NR2F1	-	9	0.653	26.275	11.0371
chr25:18515803-18516120	-1.27	cav2	5.83	50409	chr25:18515882-18515888	M03840-NR2F1	-	7	0.609	26.275	11.0371
chr2:10411934-10412541	-1.27	gadd45aa	3.12	84527	chr2:10411939-10411951	M02591-NR2F1	-	13	0.685	26.275	11.0371
chr2:10411934-10412541	-1.27	gadd45aa	3.12	84527	chr2:10411939-10411951	M05954-NR2F1	-	13	0.685	26.275	11.0371
chr2:10411934-10412541	-1.27	gadd45aa	3.12	84527	chr2:10411939-10411953	M03841-NR2F2	-	15	0.676	26.275	11.0371
[truncated: 17,793 more rows]

## Sheet: ATACseq_matrix
gene_id	baseMean	log2FoldChange	lfcSE	stat	pvalue	padj	ATAC_wt	ATAC_mut
chr1:39-230	5.20336	1.49	1.91129	0.777186	0.44	1	2.7181	7.72599
chr1:11012-12169	69.6521	-0.03	0.45378	-0.0583357	0.95	1	69.7645	69.5339
chr1:16813-17253	36.1497	0.26	0.635942	0.413615	0.68	1	32.6172	39.7337
chr1:17840-18019	17.7097	-0.39	0.900715	-0.431924	0.67	1	19.9327	15.452
chr1:18539-18974	46.0087	-0.21	0.563151	-0.366598	0.71	1	48.9258	43.0448
chr1:27542-28136	82.98	-0.07	0.416472	-0.160084	0.87	1	84.2611	81.6747
chr1:36533-37281	126.341	0.09	0.344058	0.266709	0.79	1	121.408	131.342
chr1:44036-44756	99.8681	0.09	0.381418	0.235183	0.81	1	96.0395	103.749
chr1:48049-48266	29.4857	0.12	0.698364	0.16638	0.87	1	28.087	30.904
chr1:50426-50801	36.0584	-0.71	0.664743	-1.0648	0.29	1	44.3956	27.5928
chr1:55661-56165	46.2826	-0.71	0.592003	-1.20649	0.23	1	57.0801	35.3188
chr1:59931-60196	18.6226	-1.47	0.978133	-1.50688	0.13	1	27.181	9.93341
chr1:63049-63612	57.6934	-0.04	0.499087	-0.0731839	0.94	1	57.9861	57.3931
chr1:64774-65234	36.4236	-0.37	0.639524	-0.579863	0.56	1	40.7715	32.0077
chr1:74146-74869	111.644	-0.25	0.368527	-0.686758	0.49	1	120.502	102.645
chr1:79243-80104	45.3697	0.04	0.56382	0.0720847	0.94	1	44.3956	46.3559
chr1:83795-84227	24.2824	-0.15	0.767349	-0.198087	0.84	1	25.3689	23.178
chr1:87534-87945	11.8673	-0.22	1.117	-0.199096	0.84	1	12.6845	11.0371
chr1:93319-94527	57.0544	-0.39	0.513581	-0.768834	0.44	1	64.3283	49.6671
chr1:97605-97820	14.5146	-0.96	1.03636	-0.925698	0.35	1	19.0267	9.93341
chr1:99580-99819	17.8923	0.85	0.919153	0.922587	0.36	1	12.6845	23.178
chr1:102110-102335	12.5976	0.38	1.07834	0.351016	0.73	1	10.8724	14.3483
chr1:104071-104250	7.21168	-1.2	1.55342	-0.770166	0.44	1	9.96636	4.41485
chr1:104494-104744	10.1329	-1.06	1.28601	-0.82339	0.41	1	13.5905	6.62228
chr1:109575-109994	37.0626	-0.68	0.653984	-1.04036	0.3	1	45.3016	28.6965
chr1:110841-111148	10.6806	-0.84	1.22618	-0.682196	0.5	1	13.5905	7.72599
chr1:138946-139212	7.57683	0.46	1.44676	0.314968	0.75	1	6.34223	8.8297
chr1:143922-144374	26.5645	-0.39	0.742884	-0.52369	0.6	1	29.8991	23.178
chr1:157180-158096	84.8057	0.06	0.411747	0.143343	0.89	1	82.449	87.1933
chr1:160773-161111	24.5562	0.2	0.762875	0.267595	0.79	1	22.6508	26.4891
chr1:171031-171902	74.8554	-0.14	0.439503	-0.320503	0.75	1	77.9188	71.7413
chr1:173672-173847	11.2283	-0.64	1.17555	-0.547702	0.58	1	13.5905	8.8297
chr1:176190-176807	9.22	0.92	1.33147	0.687296	0.49	1	6.34223	12.1408
chr1:179982-180279	8.03326	2.96	1.75891	1.68483	0.092	1	1.81207	14.3483
chr1:185110-185438	19.2616	-1.14	0.9237	-1.22931	0.22	1	26.275	12.1408
chr1:196250-197063	104.432	-0.04	0.373408	-0.108078	0.91	1	105.1	103.749
chr1:197426-197677	14.5146	-0.96	1.03636	-0.925698	0.35	1	19.0267	9.93341
chr1:205687-206085	26.5645	-0.39	0.742884	-0.52369	0.6	1	29.8991	23.178
chr1:209116-209759	58.515	-0.4	0.507738	-0.794164	0.43	1	66.1404	50.7708
chr1:210292-210708	33.5937	-0.25	0.660408	-0.380882	0.7	1	36.2413	30.904
chr1:218880-219899	162.674	-0.32	0.321563	-1.00113	0.32	1	179.395	145.69
chr1:225248-225435	5.56851	0.53	1.74498	0.301476	0.76	1	4.53016	6.62228
chr1:231924-232537	46.739	-0.39	0.566006	-0.681075	0.5	1	52.5499	40.8374
chr1:241764-241935	5.75109	1.68	1.81823	0.922916	0.36	1	2.7181	8.8297
chr1:254878-255644	24.9214	0.03	0.755881	0.0419512	0.97	1	24.4629	25.3854
chr1:256688-257057	23.9172	0.02	0.771174	0.0285637	0.98	1	23.5569	24.2817
chr1:264002-264193	11.137	0.53	1.16861	0.450168	0.65	1	9.06033	13.2446
chr1:264533-265101	64.9964	0.13	0.470663	0.275714	0.78	1	61.6102	68.4302
chr1:270061-270250	6.29881	1.85	1.74517	1.05892	0.29	1	2.7181	9.93341
chr1:278581-278990	7.21168	1.11	1.52886	0.726707	0.47	1	4.53016	9.93341
chr1:295451-295801	7.30297	1.58	1.57349	1.00729	0.31	1	3.62413	11.0371
chr1:298884-299394	12.7802	-0.42	1.07444	-0.386279	0.7	1	14.4965	11.0371
chr1:301732-301979	16.9794	0.09	0.90997	0.102323	0.92	1	16.3086	17.6594
chr1:314162-314338	7.7594	-0.87	1.46352	-0.597506	0.55	1	9.96636	5.51856
chr1:314751-315155	12.415	-0.08	1.08371	-0.0783294	0.94	1	12.6845	12.1408
chr1:317889-318232	22.0002	0.13	0.803975	0.163924	0.87	1	20.8388	23.178
chr1:325666-326115	18.8051	-0.2	0.868848	-0.226041	0.82	1	19.9327	17.6594
chr1:330833-331326	32.9546	-0.39	0.672298	-0.586164	0.56	1	37.1473	28.6965
chr1:336844-337415	46.4651	-0.23	0.561176	-0.415061	0.68	1	49.8318	43.0448
chr1:339248-339635	37.6103	-0.2	0.623009	-0.315238	0.75	1	39.8654	35.3188
chr1:340905-341161	16.9794	1.07	0.960845	1.11401	0.27	1	10.8724	23.178
chr1:342433-343341	100.781	-0.41	0.394608	-1.04018	0.3	1	114.16	87.1933
chr1:350528-350900	17.9836	0.1	0.884873	0.115916	0.91	1	17.2146	18.7631
chr1:358390-359041	58.0586	-0.11	0.498412	-0.218562	0.83	1	59.7982	56.2893
chr1:366364-366756	12.415	-0.08	1.08371	-0.0783294	0.94	1	12.6845	12.1408
chr1:371792-372011	11.137	0.53	1.16861	0.450168	0.65	1	9.06033	13.2446
chr1:375699-375957	20.1744	-0.38	0.846635	-0.449804	0.65	1	22.6508	17.6594
chr1:377801-378014	11.776	-0.47	1.13208	-0.418636	0.68	1	13.5905	9.93341
chr1:378370-378781	51.4859	-0.18	0.531418	-0.347041	0.73	1	54.362	48.5634
chr1:384648-385067	13.2366	-0.5	1.05653	-0.47561	0.63	1	15.4026	11.0371
chr1:385830-386093	12.1412	0.5	1.10752	0.455112	0.65	1	9.96636	14.3483
chr1:389913-390090	7.30297	-0.74	1.49886	-0.49168	0.62	1	9.06033	5.51856
chr1:392597-393058	32.5895	-0.27	0.670607	-0.398861	0.69	1	35.3353	29.8002
chr1:397420-397709	18.3487	-0.13	0.877681	-0.147299	0.88	1	19.0267	17.6594
chr1:398783-399284	53.1291	-0.09	0.521027	-0.171328	0.86	1	54.362	51.8745
chr1:402928-403207	18.2574	-0.29	0.883882	-0.327538	0.74	1	19.9327	16.5557
chr1:405427-405622	11.4109	-0.12	1.1421	-0.101108	0.92	1	11.7784	11.0371
chr1:414757-415260	35.9671	-0.34	0.642046	-0.527088	0.6	1	39.8654	32.0077
chr1:415948-416397	105.528	-0.01	0.371463	-0.0268765	0.98	1	105.1	105.956
chr1:421521-421972	41.9921	0.13	0.587088	0.213821	0.83	1	39.8654	44.1485
chr1:423603-423830	20.2657	-0.23	0.839606	-0.279254	0.78	1	21.7448	18.7631
chr1:424276-424840	33.2285	-1.13	0.732448	-1.54672	0.12	1	45.3016	20.9705
chr1:426833-427028	10.9545	1.58	1.27575	1.24237	0.21	1	5.4362	16.5557
chr1:433907-434192	9.40257	1.64	1.39577	1.17609	0.24	1	4.53016	14.3483
chr1:450838-451225	30.3986	0.03	0.687965	0.0377873	0.97	1	29.8991	30.904
chr1:454781-455031	6.3901	2.58	1.87107	1.38154	0.17	1	1.81207	11.0371
chr1:469087-469338	11.6847	-2.61	1.4273	-1.82963	0.067	1	19.9327	3.31114
chr1:469513-469849	25.3778	-0.65	0.774707	-0.844838	0.4	1	30.8051	19.8668
chr1:476481-477249	75.677	-0.42	0.449979	-0.942661	0.35	1	86.0731	65.1191
chr1:487136-487365	6.75524	-1.06	1.59368	-0.664429	0.51	1	9.06033	4.41485
chr1:491387-492065	15.3362	-0.21	0.961616	-0.214689	0.83	1	16.3086	14.3483
chr1:498833-499266	34.7804	-0.07	0.64533	-0.105636	0.92	1	35.3353	34.2151
chr1:499457-499689	13.3279	-0.28	1.04266	-0.266176	0.79	1	14.4965	12.1408
chr1:511266-511556	12.8715	-0.18	1.062	-0.173656	0.86	1	13.5905	12.1408
chr1:518442-518945	29.2119	-0.18	0.70352	-0.256668	0.8	1	30.8051	27.5928
chr1:525299-525711	21.1786	-0.35	0.826214	-0.423547	0.67	1	23.5569	18.7631
chr1:527086-527334	7.66812	-1.32	1.52075	-0.869254	0.38	1	10.8724	4.41485
chr1:534365-534538	6.93782	-0.15	1.51243	-0.1005	0.92	1	7.24826	6.62228
chr1:537497-538084	37.3364	-0.01	0.622384	-0.0113335	0.99	1	37.1473	37.5262
chr1:548557-548963	7.21168	-1.2	1.55342	-0.770166	0.44	1	9.96636	4.41485
chr1:570761-571140	8.39841	-0.25	1.369	-0.183736	0.85	1	9.06033	7.72599
chr1:579413-579939	14.2408	-0.45	1.01029	-0.442901	0.66	1	16.3086	12.1408
chr1:580519-580736	5.11208	-3.06	2.32227	-1.31719	0.19	1	9.06033	1.10371
chr1:585400-585820	21.8176	-0.13	0.808271	-0.164416	0.87	1	22.6508	20.9705
chr1:587083-587378	11.2283	-0.64	1.17555	-0.547702	0.58	1	13.5905	8.8297
chr1:595998-596458	20.6309	0.33	0.833179	0.400184	0.69	1	18.1207	23.178
chr1:597361-597704	30.855	-0.54	0.701255	-0.763389	0.45	1	36.2413	25.3854
chr1:599278-599850	39.5273	-1.1	0.676189	-1.62092	0.11	1	53.4559	25.3854
chr1:601615-601926	32.5895	-0.27	0.670607	-0.398861	0.69	1	35.3353	29.8002
chr1:602124-602425	18.3487	-0.13	0.877681	-0.147299	0.88	1	19.0267	17.6594
chr1:610045-611198	92.9303	-0.41	0.408368	-0.99205	0.32	1	105.1	80.571
chr1:619120-619706	57.876	-0.21	0.501708	-0.418007	0.68	1	61.6102	54.0819
chr1:629556-629729	5.93366	-0.22	1.66767	-0.133352	0.89	1	6.34223	5.51856
chr1:631334-631507	5.38594	-0.54	1.79364	-0.30347	0.76	1	6.34223	4.41485
chr1:640236-640525	13.6018	0.37	1.02999	0.359179	0.72	1	11.7784	15.452
chr1:646420-646834	42.3572	0.02	0.583838	0.042607	0.97	1	41.6775	43.0448
chr1:648561-649426	63.1707	-0.28	0.483028	-0.588895	0.56	1	68.8585	57.3931
chr1:652566-653080	35.2368	-0.1	0.641673	-0.163161	0.87	1	36.2413	34.2151
chr1:655737-656150	35.6933	0.3	0.641222	0.473592	0.64	1	31.7111	39.7337
chr1:656605-656905	22.6392	-0.37	0.801293	-0.467237	0.64	1	25.3689	19.8668
chr1:660645-661769	90.8307	0.42	0.412354	1.02703	0.3	1	77.0128	104.853
chr1:668156-668329	14.2408	-0.45	1.01029	-0.442901	0.66	1	16.3086	12.1408
chr1:668663-669241	129.445	-0.37	0.353945	-1.05212	0.29	1	144.965	113.682
chr1:669672-669973	33.4111	0.05	0.657614	0.071937	0.94	1	32.6172	34.2151
chr1:672247-672611	46.6477	-0.81	0.598323	-1.34565	0.18	1	58.8921	34.2151
chr1:674085-674712	67.3699	0.07	0.461527	0.152515	0.88	1	65.2344	69.5339
chr1:684487-684736	29.2119	-0.18	0.70352	-0.256668	0.8	1	30.8051	27.5928
chr1:685279-686433	129.08	0.15	0.342314	0.44153	0.66	1	121.408	136.86
chr1:686910-687172	28.0251	-1.01	0.771948	-1.30456	0.19	1	37.1473	18.7631
chr1:702043-702274	5.47723	0	1.75508	2.10477e-06	1	1	5.4362	5.51856
chr1:702593-702819	13.0541	-0.98	1.10148	-0.894151	0.37	1	17.2146	8.8297
chr1:706912-707449	22.6392	-0.37	0.801293	-0.467237	0.64	1	25.3689	19.8668
chr1:713671-714063	45.0958	-0.51	0.583347	-0.86995	0.38	1	52.5499	37.5262
chr1:717879-718099	13.7844	-0.36	1.02549	-0.355921	0.72	1	15.4026	12.1408
chr1:718462-718686	11.776	0.9	1.15263	0.781229	0.43	1	8.1543	15.452
chr1:718722-719414	34.5065	0.14	0.648059	0.212179	0.83	1	32.6172	36.4225
chr1:732064-732299	15.1537	-0.6	0.985091	-0.608532	0.54	1	18.1207	12.1408
chr1:734016-734455	48.8386	-0.3	0.549691	-0.54154	0.59	1	53.4559	44.1485
chr1:756083-756299	12.3238	-0.32	1.09453	-0.294123	0.77	1	13.5905	11.0371
chr1:758253-758539	12.8715	-0.18	1.062	-0.173656	0.86	1	13.5905	12.1408
chr1:764970-765284	19.1703	-1.32	0.947131	-1.39571	0.16	1	27.181	11.0371
chr1:766434-766607	9.49386	0.11	1.27602	0.0870155	0.93	1	9.06033	9.93341
chr1:767283-767804	29.6683	-0.22	0.699515	-0.317922	0.75	1	31.7111	27.5928
chr1:770363-770683	28.1164	0.26	0.716776	0.36697	0.71	1	25.3689	30.904
chr1:783049-783643	38.8883	-0.37	0.619045	-0.594029	0.55	1	43.4896	34.2151
chr1:793803-794273	11.0457	1.94	1.32075	1.4697	0.14	1	4.53016	17.6594
chr1:796441-796848	14.0582	0.26	1.0078	0.261	0.79	1	12.6845	15.452
chr1:797156-797524	6.93782	-0.15	1.51243	-0.1005	0.92	1	7.24826	6.62228
chr1:800622-800795	9.76772	-0.63	1.27734	-0.493251	0.62	1	11.7784	7.72599
chr1:802127-802471	47.4693	0.11	0.551503	0.201326	0.84	1	45.3016	49.6671
chr1:803225-803407	7.85069	-0.47	1.42695	-0.332125	0.74	1	9.06033	6.62228
chr1:810590-810977	15.2449	-0.4	0.971359	-0.41172	0.68	1	17.2146	13.2446
chr1:812398-812917	27.021	0.16	0.728116	0.214417	0.83	1	25.3689	28.6965
chr1:826464-827003	24.3737	-0.03	0.764312	-0.0424174	0.97	1	24.4629	24.2817
chr1:828829-829259	13.6931	-0.58	1.04061	-0.562131	0.57	1	16.3086	11.0371
chr1:837058-837320	14.7885	-0.32	0.984151	-0.32711	0.74	1	16.3086	13.2446
chr1:837966-838262	11.6847	0.64	1.14053	0.562498	0.57	1	9.06033	14.3483
chr1:843840-844372	50.6643	-0.72	0.56791	-1.26113	0.21	1	62.5163	38.6299
chr1:848675-849159	29.8509	0.51	0.706882	0.718858	0.47	1	24.4629	35.3188
chr1:854035-855017	91.7435	-0.13	0.397935	-0.324883	0.75	1	95.1334	88.297
chr1:864586-865166	30.9463	0.08	0.682307	0.112299	0.91	1	29.8991	32.0077
chr1:869862-870364	17.4358	0.95	0.93885	1.01711	0.31	1	11.7784	23.178
chr1:870536-870719	8.94614	-0.06	1.31977	-0.0446222	0.96	1	9.06033	8.8297
chr1:877565-877909	8.30713	-0.61	1.39375	-0.438696	0.66	1	9.96636	6.62228
chr1:885107-885298	10.3154	-0.44	1.2258	-0.356831	0.72	1	11.7784	8.8297
chr1:885874-886045	7.48554	0.07	1.44884	0.0485852	0.96	1	7.24826	7.72599
chr1:891479-891870	7.30297	1.58	1.57349	1.00729	0.31	1	3.62413	11.0371
chr1:902296-902861	61.4362	-0.16	0.485452	-0.3271	0.74	1	64.3283	58.4968
chr1:904782-905101	23.7346	-0.22	0.777638	-0.285983	0.77	1	25.3689	22.0743
chr1:911110-911720	60.1582	-0.05	0.488712	-0.0985581	0.92	1	60.7042	59.6005
chr1:917359-917724	32.3156	-0.05	0.668581	-0.0731527	0.94	1	32.6172	32.0077
chr1:924714-924941	7.94198	-0.1	1.40589	-0.0707967	0.94	1	8.1543	7.72599
chr1:928038-928377	8.39841	1.85	1.50697	1.22629	0.22	1	3.62413	13.2446
chr1:938170-938845	24.7388	-0.2	0.761612	-0.266051	0.79	1	26.275	23.178
chr1:950813-951269	43.5439	-0.2	0.578835	-0.345412	0.73	1	46.2077	40.8374
chr1:954093-954594	24.4649	0.09	0.762829	0.112945	0.91	1	23.5569	25.3854
chr1:958456-958760	11.137	0.53	1.16861	0.450168	0.65	1	9.06033	13.2446
chr1:964868-965251	19.8093	-0.17	0.847149	-0.204289	0.84	1	20.8388	18.7631
chr1:966318-966674	27.2036	0.37	0.731305	0.505878	0.61	1	23.5569	30.904
chr1:978350-978601	10.1329	0.55	1.23895	0.445976	0.66	1	8.1543	12.1408
chr1:980580-980757	5.56851	0.53	1.74498	0.301476	0.76	1	4.53016	6.62228
chr1:997675-997897	7.30297	-0.74	1.49886	-0.49168	0.62	1	9.06033	5.51856
chr1:998559-998761	4.74693	-1.74	2.09998	-0.827128	0.41	1	7.24826	2.20743
chr1:999882-1000167	12.8715	-0.18	1.062	-0.173656	0.86	1	13.5905	12.1408
chr1:1005058-1005247	7.85069	-0.47	1.42695	-0.332125	0.74	1	9.06033	6.62228
chr1:1011843-1012143	5.29465	-1.15	1.86855	-0.616517	0.54	1	7.24826	3.31114
chr1:1022542-1022883	5.47723	0	1.75508	2.10477e-06	1	1	5.4362	5.51856
chr1:1025734-1025905	7.30297	1.58	1.57349	1.00729	0.31	1	3.62413	11.0371
chr1:1051375-1051686	8.39841	-0.25	1.369	-0.183736	0.85	1	9.06033	7.72599
chr1:1071798-1072008	5.02079	0.26	1.86561	0.140993	0.89	1	4.53016	5.51856
chr1:1075153-1075326	4.83822	-0.96	1.96616	-0.48793	0.63	1	6.34223	3.31114
chr1:1083982-1084308	7.48554	2.85	1.78771	1.59309	0.11	1	1.81207	13.2446
chr1:1111016-1111238	6.75524	-1.06	1.59368	-0.664429	0.51	1	9.06033	4.41485
chr1:1118344-1118700	6.29881	1.85	1.74517	1.05892	0.29	1	2.7181	9.93341
chr1:1118932-1119263	10.5893	0.4	1.20034	0.333688	0.74	1	9.06033	12.1408
chr1:1119386-1119630	12.2325	-0.57	1.11123	-0.510282	0.61	1	14.4965	9.93341
chr1:1129403-1129759	22.0915	-0.46	0.81468	-0.56078	0.57	1	25.3689	18.7631
chr1:1140389-1140927	11.0457	-1.24	1.24192	-0.998023	0.32	1	15.4026	6.62228
chr1:1141325-1141777	19.718	-0.32	0.85341	-0.377223	0.71	1	21.7448	17.6594
chr1:1149780-1150007	7.39425	-0.32	1.46559	-0.219655	0.83	1	8.1543	6.62228
chr1:1155708-1155881	6.93782	-0.15	1.51243	-0.1005	0.92	1	7.24826	6.62228
chr1:1161516-1161819	14.3321	-0.24	0.998693	-0.239777	0.81	1	15.4026	13.2446
chr1:1163963-1164501	19.6267	-0.47	0.862062	-0.549762	0.58	1	22.6508	16.5557
chr1:1177078-1177384	16.4317	0	0.924969	1.81724e-06	1	1	16.3086	16.5557
chr1:1186985-1187340	8.58099	0.43	1.35537	0.319442	0.75	1	7.24826	9.93341
chr1:1198599-1199107	15.884	-0.1	0.942054	-0.105656	0.92	1	16.3086	15.452
chr1:1216014-1216211	5.84237	2.43	1.93576	1.25684	0.21	1	1.81207	9.93341
chr1:1218618-1218797	6.20752	1.26	1.68164	0.751074	0.45	1	3.62413	8.8297
chr1:1238321-1238752	12.5063	0.15	1.07839	0.136833	0.89	1	11.7784	13.2446
chr1:1239013-1239470	10.1329	-1.06	1.28601	-0.82339	0.41	1	13.5905	6.62228
chr1:1240222-1240575	9.58514	0.42	1.27483	0.325565	0.74	1	8.1543	11.0371
chr1:1240756-1240931	5.56851	0.53	1.74498	0.301476	0.76	1	4.53016	6.62228
chr1:1241714-1241910	5.20336	-1.91	2.00638	-0.950408	0.34	1	8.1543	2.20743
chr1:1247880-1248069	5.6598	1.07	1.76332	0.607031	0.54	1	3.62413	7.72599
chr1:1253720-1254550	174.541	-0.04	0.301808	-0.140014	0.89	1	175.77	173.283
chr1:1266834-1267204	14.1495	-0.66	1.02651	-0.645842	0.52	1	17.2146	11.0371
chr1:1269667-1269860	6.3901	-0.42	1.59686	-0.259905	0.79	1	7.24826	5.51856
chr1:1275394-1275646	16.0665	-0.74	0.965554	-0.763254	0.45	1	19.9327	12.1408
chr1:1275970-1276357	8.94614	1.96	1.47951	1.32711	0.18	1	3.62413	14.3483
chr1:1278957-1279227	13.1453	-0.74	1.07586	-0.685	0.49	1	16.3086	9.93341
chr1:1279636-1279862	15.884	-1.15	1.00933	-1.14135	0.25	1	21.7448	9.93341
chr1:1304402-1305080	21.9089	0.74	0.830627	0.887241	0.37	1	16.3086	27.5928
chr1:1307487-1307985	18.8051	-0.2	0.868848	-0.226041	0.82	1	19.9327	17.6594
chr1:1310927-1311495	44.0917	0.2	0.574051	0.343954	0.73	1	40.7715	47.4596
chr1:1318364-1319084	21.7263	-0.27	0.813268	-0.328894	0.74	1	23.5569	19.8668
chr1:1327035-1327444	16.523	-0.8	0.957532	-0.836623	0.4	1	20.8388	12.1408
chr1:1340608-1340804	6.20752	-1.47	1.72824	-0.852846	0.39	1	9.06033	3.31114
chr1:1344422-1344668	6.75524	-1.06	1.59368	-0.664429	0.51	1	9.06033	4.41485
chr1:1344837-1345621	31.4028	-0.47	0.691848	-0.68502	0.49	1	36.2413	26.4891
chr1:1353201-1353496	15.7927	-1.38	1.0391	-1.32887	0.18	1	22.6508	8.8297
chr1:1354675-1355360	53.2204	-0.64	0.548295	-1.16504	0.24	1	64.3283	41.9411
chr1:1356240-1356842	59.793	-0.79	0.533885	-1.47986	0.14	1	75.2007	44.1485
chr1:1363317-1363633	11.5022	-1.32	1.22298	-1.0809	0.28	1	16.3086	6.62228
chr1:1364871-1365355	34.8717	-0.44	0.656854	-0.672156	0.5	1	39.8654	29.8002
chr1:1371040-1371773	18.3487	-1.03	0.932611	-1.10702	0.27	1	24.4629	12.1408
chr1:1374230-1374632	20.2657	-0.23	0.839606	-0.279254	0.78	1	21.7448	18.7631
chr1:1376659-1376882	13.8756	-0.15	1.01517	-0.14973	0.88	1	14.4965	13.2446
chr1:1380191-1380819	48.8386	-0.63	0.570199	-1.10496	0.27	1	58.8921	38.6299
chr1:1383565-1383858	12.5063	-1.18	1.14892	-1.0249	0.31	1	17.2146	7.72599
chr1:1386244-1386672	24.5562	0.2	0.762875	0.267595	0.79	1	22.6508	26.4891
chr1:1392734-1393012	7.39425	-0.32	1.46559	-0.219655	0.83	1	8.1543	6.62228
chr1:1397150-1397656	32.1331	0.26	0.673291	0.390671	0.7	1	28.9931	35.3188
chr1:1410333-1410506	7.02911	0.26	1.50085	0.175259	0.86	1	6.34223	7.72599
chr1:1437714-1438052	20.2657	-1.06	0.895461	-1.18251	0.24	1	27.181	13.2446
chr1:1444468-1444899	33.0459	-0.3	0.667502	-0.455437	0.65	1	36.2413	29.8002
chr1:1450863-1451036	5.29465	-1.15	1.86855	-0.616517	0.54	1	7.24826	3.31114
chr1:1451907-1452520	13.2366	-0.5	1.05653	-0.47561	0.63	1	15.4026	11.0371
chr1:1453937-1454406	9.67643	-0.96	1.31054	-0.732028	0.46	1	12.6845	6.62228
chr1:1466492-1466674	6.84653	-0.58	1.54196	-0.37936	0.7	1	8.1543	5.51856
chr1:1470545-1470722	6.29881	-0.91	1.6459	-0.550997	0.58	1	8.1543	4.41485
chr1:1481520-1481788	10.3154	1.16	1.27025	0.910149	0.36	1	6.34223	14.3483
chr1:1486926-1487097	9.49386	0.11	1.27602	0.0870155	0.93	1	9.06033	9.93341
chr1:1487676-1487982	34.6891	-0.15	0.647526	-0.234743	0.81	1	36.2413	33.1114
chr1:1491530-1491826	29.6683	-0.77	0.731369	-1.05636	0.29	1	37.1473	22.0743
chr1:1493153-1493402	15.884	-0.1	0.942054	-0.105656	0.92	1	16.3086	15.452
chr1:1503155-1503353	5.56851	0.53	1.74498	0.301476	0.76	1	4.53016	6.62228
chr1:1513579-1513833	19.6267	-0.47	0.862062	-0.549762	0.58	1	22.6508	16.5557
chr1:1514559-1515029	40.8053	-0.02	0.59511	-0.0325392	0.97	1	40.7715	40.8374
chr1:1516818-1517264	25.104	-0.37	0.762017	-0.484546	0.63	1	28.087	22.0743
chr1:1530898-1531516	21.3612	-0.07	0.815649	-0.0907242	0.93	1	21.7448	20.9705
chr1:1536072-1536384	13.2366	-0.5	1.05653	-0.47561	0.63	1	15.4026	11.0371
chr1:1537230-1537462	7.12039	-1.74	1.63965	-1.05934	0.29	1	10.8724	3.31114
chr1:1546757-1546930	5.47723	0	1.75508	2.10477e-06	1	1	5.4362	5.51856
chr1:1553918-1554229	9.49386	0.11	1.27602	0.0870155	0.93	1	9.06033	9.93341
chr1:1561119-1561482	30.1247	-0.26	0.695781	-0.37804	0.71	1	32.6172	27.5928
chr1:1563987-1564471	85.1709	0.2	0.413464	0.471942	0.64	1	78.8249	91.6082
chr1:1565610-1566449	88.0008	-0.05	0.404537	-0.118393	0.91	1	88.7912	87.1933
chr1:1566996-1567566	73.6687	-0.44	0.456987	-0.969905	0.33	1	84.2611	62.9116
chr1:1585531-1585827	12.9628	0.04	1.05477	0.0385336	0.97	1	12.6845	13.2446
chr1:1593936-1594153	9.31128	-0.51	1.30589	-0.394037	0.69	1	10.8724	7.72599
chr1:1597928-1598193	11.5022	1.68	1.25363	1.33857	0.18	1	5.4362	17.6594
chr1:1603852-1604177	30.3073	-0.6	0.711201	-0.842885	0.4	1	36.2413	24.2817
chr1:1611245-1611750	16.3404	-1.21	1.00256	-1.2078	0.23	1	22.6508	9.93341
chr1:1618192-1618470	13.7844	0.8	1.04461	0.769283	0.44	1	9.96636	17.6594
chr1:1620970-1621469	18.8964	-1.97	1.77601	-1.11147	0.27	1	29.8991	7.72599
chr1:1624532-1624855	34.3239	-0.03	0.649196	-0.0472827	0.96	1	34.4292	34.2151
chr1:1627454-1627777	8.58099	0.43	1.35537	0.319442	0.75	1	7.24826	9.93341
chr1:1637168-1637339	5.84237	2.43	1.93576	1.25684	0.21	1	1.81207	9.93341
chr1:1674955-1675268	11.9586	0.02	1.10808	0.0198798	0.98	1	11.7784	12.1408
chr1:1679724-1680046	7.30297	-0.74	1.49886	-0.49168	0.62	1	9.06033	5.51856
chr1:1682460-1682631	7.12039	0.68	1.50597	0.450256	0.65	1	5.4362	8.8297
chr1:1701389-1701673	25.1952	-0.25	0.756334	-0.332575	0.74	1	27.181	23.178
chr1:1737337-1738055	84.258	0.04	0.412935	0.0984234	0.92	1	82.449	86.0896
chr1:1746165-1746424	12.5063	-1.18	1.14892	-1.0249	0.31	1	17.2146	7.72599
chr1:1753733-1754065	9.76772	-0.63	1.27734	-0.493251	0.62	1	11.7784	7.72599
chr1:1754663-1754892	15.6101	0.36	0.954289	0.373205	0.71	1	13.5905	17.6594
chr1:1758796-1759232	11.9586	0.02	1.10808	0.0198798	0.98	1	11.7784	12.1408
chr1:1779633-1779804	5.84237	2.43	1.93576	1.25684	0.21	1	1.81207	9.93341
chr1:1780005-1780396	12.0499	0.26	1.10496	0.23805	0.81	1	10.8724	13.2446
chr1:1793118-1793803	40.2576	-0.06	0.599505	-0.0982355	0.92	1	40.7715	39.7337
chr1:1801451-1801852	12.1412	0.5	1.10752	0.455112	0.65	1	9.96636	14.3483
chr1:1849063-1849234	7.12039	0.68	1.50597	0.450256	0.65	1	5.4362	8.8297
chr1:1869244-1869529	8.85485	1.53	1.424	1.07168	0.28	1	4.53016	13.2446
chr1:1871451-1871900	25.1952	0.38	0.758397	0.499096	0.62	1	21.7448	28.6965
chr1:1874218-1874478	22.9131	-0.69	0.815389	-0.847644	0.4	1	28.087	17.6594
chr1:1884094-1884298	7.85069	-0.47	1.42695	-0.332125	0.74	1	9.06033	6.62228
chr1:1885682-1885894	13.5105	0.16	1.02961	0.151631	0.88	1	12.6845	14.3483
chr1:1908280-1908468	5.29465	-1.15	1.86855	-0.616517	0.54	1	7.24826	3.31114
chr1:1927856-1928081	16.4317	0	0.924969	1.81724e-06	1	1	16.3086	16.5557
chr1:1948153-1948799	53.3117	-0.58	0.543331	-1.06904	0.29	1	63.4223	43.0448
chr1:1953350-1954229	88.2746	0.23	0.407623	0.564848	0.57	1	80.6369	96.023
chr1:1954830-1955238	68.2827	-0.68	0.492446	-1.37185	0.17	1	83.355	52.9782
chr1:1961462-1961799	38.5232	0.15	0.613572	0.245384	0.81	1	36.2413	40.8374
chr1:1964653-1965336	126.341	-0.41	0.36012	-1.14237	0.25	1	143.153	109.268
chr1:1972869-1973055	8.94614	-0.06	1.31977	-0.0446222	0.96	1	9.06033	8.8297
chr1:1973276-1973496	6.75524	1.43	1.61973	0.884691	0.38	1	3.62413	9.93341
chr1:1978692-1979368	72.5732	-0.27	0.450737	-0.605714	0.54	1	78.8249	66.2228
chr1:1980323-1980653	15.2449	-1.57	1.08207	-1.45412	0.15	1	22.6508	7.72599
chr1:1986267-1986672	24.6475	-1	0.815124	-1.22681	0.22	1	32.6172	16.5557
chr1:1991041-1991400	29.6683	-0.22	0.699515	-0.317922	0.75	1	31.7111	27.5928
chr1:1993694-1994166	65.179	-0.27	0.474904	-0.563228	0.57	1	70.6706	59.6005
chr1:1995783-1996149	40.6228	-0.16	0.598497	-0.27113	0.79	1	42.5835	38.6299
chr1:1997240-1997528	26.382	-0.01	0.735649	-0.0135701	0.99	1	26.275	26.4891
chr1:1999567-1999821	13.6931	-2	1.20669	-1.65743	0.097	1	21.7448	5.51856
chr1:2001400-2001693	20.7222	0.47	0.836787	0.567097	0.57	1	17.2146	24.2817
chr1:2007356-2007665	11.5935	-1.02	1.18382	-0.859143	0.39	1	15.4026	7.72599
chr1:2013241-2013419	6.3901	-0.42	1.59686	-0.259905	0.79	1	7.24826	5.51856
chr1:2015696-2016224	18.8051	-0.2	0.868848	-0.226041	0.82	1	19.9327	17.6594
chr1:2022265-2022562	13.6931	0.58	1.0349	0.565238	0.57	1	10.8724	16.5557
chr1:2024763-2025183	16.0665	-0.74	0.965554	-0.763254	0.45	1	19.9327	12.1408
chr1:2030918-2031134	5.84237	-0.74	1.71213	-0.430435	0.67	1	7.24826	4.41485
chr1:2036162-2036446	16.9794	0.09	0.90997	0.102323	0.92	1	16.3086	17.6594
chr1:2038385-2038672	7.02911	0.26	1.50085	0.175259	0.86	1	6.34223	7.72599
chr1:2058549-2058793	15.7014	0.54	0.958848	0.566454	0.57	1	12.6845	18.7631
chr1:2061460-2061936	30.855	-0.54	0.701255	-0.763389	0.45	1	36.2413	25.3854
chr1:2062481-2062656	5.75109	1.68	1.81823	0.922916	0.36	1	2.7181	8.8297
chr1:2073775-2074910	100.416	0.26	0.38553	0.682268	0.5	1	90.6033	110.371
chr1:2079810-2080033	7.30297	-0.74	1.49886	-0.49168	0.62	1	9.06033	5.51856
chr1:2087708-2088086	17.2533	-0.32	0.909451	-0.353979	0.72	1	19.0267	15.452
chr1:2091267-2091800	18.1661	0.42	0.887779	0.477034	0.63	1	15.4026	20.9705
chr1:2102805-2103251	49.934	0.09	0.537264	0.166964	0.87	1	48.0197	51.8745
chr1:2112292-2112979	182.209	-0.09	0.297769	-0.310807	0.76	1	186.643	177.698
chr1:2114100-2114353	14.3321	-1.45	1.09892	-1.32236	0.19	1	20.8388	7.72599
chr1:2121502-2121861	10.4067	1.49	1.3002	1.14246	0.25	1	5.4362	15.452
chr1:2153901-2154726	82.7974	0.05	0.416555	0.129846	0.9	1	80.6369	84.9859
chr1:2155713-2155891	9.67643	-0.96	1.31054	-0.732028	0.46	1	12.6845	6.62228
chr1:2161959-2162183	14.4234	-0.04	0.9914	-0.0368408	0.97	1	14.4965	14.3483
chr1:2162336-2162752	16.7055	-1.49	1.02709	-1.45251	0.15	1	24.4629	8.8297
chr1:2164939-2165256	23.0956	-0.43	0.795874	-0.534029	0.59	1	26.275	19.8668
chr1:2165914-2166087	6.20752	1.26	1.68164	0.751074	0.45	1	3.62413	8.8297
chr1:2168340-2168526	5.84237	2.43	1.93576	1.25684	0.21	1	1.81207	9.93341
chr1:2173504-2173675	6.57267	0.49	1.56647	0.309888	0.76	1	5.4362	7.72599
chr1:2175891-2176361	18.8051	-0.2	0.868848	-0.226041	0.82	1	19.9327	17.6594
chr1:2181817-2182795	18.5313	0.19	0.873088	0.21193	0.83	1	17.2146	19.8668
chr1:2221181-2221539	33.8675	0.01	0.653286	0.0119066	0.99	1	33.5232	34.2151
chr1:2224178-2224461	8.30713	1.4	1.45417	0.963116	0.34	1	4.53016	12.1408
chr1:2230004-2230191	5.20336	-1.91	2.00638	-0.950408	0.34	1	8.1543	2.20743
chr1:2235902-2236643	71.3865	-0.14	0.449933	-0.31187	0.76	1	74.2947	68.4302
chr1:2238436-2238625	12.1412	0.5	1.10752	0.455112	0.65	1	9.96636	14.3483
chr1:2244385-2244659	28.6641	-0.24	0.711384	-0.336618	0.74	1	30.8051	26.4891
chr1:2251211-2251404	7.39425	-0.32	1.46559	-0.219655	0.83	1	8.1543	6.62228
chr1:2252464-2252731	14.7885	-0.32	0.984151	-0.32711	0.74	1	16.3086	13.2446
chr1:2268882-2269055	8.39841	-0.25	1.369	-0.183736	0.85	1	9.06033	7.72599
chr1:2271294-2271467	5.93366	-0.22	1.66767	-0.133352	0.89	1	6.34223	5.51856
chr1:2278835-2279096	7.39425	2.14	1.65027	1.29524	0.2	1	2.7181	12.1408
chr1:2281506-2281851	14.5146	0.16	0.988195	0.165454	0.87	1	13.5905	15.452
chr1:2291250-2291541	5.84237	-0.74	1.71213	-0.430435	0.67	1	7.24826	4.41485
chr1:2294273-2294656	6.11624	0.75	1.65252	0.452923	0.65	1	4.53016	7.72599
chr1:2301469-2301678	6.20752	-1.47	1.72824	-0.852846	0.39	1	9.06033	3.31114
chr1:2305267-2305438	5.29465	2.26	2.01837	1.12121	0.26	1	1.81207	8.8297
chr1:2307494-2307895	11.6847	0.64	1.14053	0.562498	0.57	1	9.06033	14.3483
chr1:2311707-2311878	6.20752	1.26	1.68164	0.751074	0.45	1	3.62413	8.8297
chr1:2313769-2314490	41.7182	-0.08	0.589049	-0.139377	0.89	1	42.5835	40.8374
chr1:2317193-2317418	20.5396	0.19	0.831635	0.231648	0.82	1	19.0267	22.0743
chr1:2319102-2319465	16.523	-0.8	0.957532	-0.836623	0.4	1	20.8388	12.1408
chr1:2319777-2320142	13.8756	-0.15	1.01517	-0.14973	0.88	1	14.4965	13.2446
chr1:2341300-2341566	10.5893	0.4	1.20034	0.333688	0.74	1	9.06033	12.1408
chr1:2344011-2344427	14.3321	-0.24	0.998693	-0.239777	0.81	1	15.4026	13.2446
chr1:2357779-2358119	6.29881	-0.91	1.6459	-0.550997	0.58	1	8.1543	4.41485
chr1:2362209-2362532	15.884	-0.1	0.942054	-0.105656	0.92	1	16.3086	15.452
chr1:2365838-2366287	10.7719	-0.54	1.19945	-0.453805	0.65	1	12.6845	8.8297
chr1:2391558-2392172	8.94614	1.96	1.47951	1.32711	0.18	1	3.62413	14.3483
chr1:2397527-2397822	9.76772	-0.63	1.27734	-0.493251	0.62	1	11.7784	7.72599
chr1:2402999-2403235	4.65564	-2.91	2.41067	-1.20583	0.23	1	8.1543	1.10371
chr1:2415260-2415462	4.74693	-1.74	2.09998	-0.827128	0.41	1	7.24826	2.20743
chr1:2418622-2419079	17.9836	0.1	0.884873	0.115916	0.91	1	17.2146	18.7631
chr1:2435331-2435502	5.75109	1.68	1.81823	0.922916	0.36	1	2.7181	8.8297
chr1:2445237-2445450	6.75524	1.43	1.61973	0.884691	0.38	1	3.62413	9.93341
chr1:2456415-2456864	20.2657	0.55	0.849308	0.650579	0.52	1	16.3086	24.2817
chr1:2463709-2463977	6.20752	-1.47	1.72824	-0.852846	0.39	1	9.06033	3.31114
chr1:2465455-2465819	14.2408	-0.45	1.01029	-0.442901	0.66	1	16.3086	12.1408
chr1:2473681-2473854	5.29465	-1.15	1.86855	-0.616517	0.54	1	7.24826	3.31114
chr1:2475098-2475283	8.03326	0.26	1.39812	0.188136	0.85	1	7.24826	8.8297
chr1:2478217-2478483	8.94614	1.96	1.47951	1.32711	0.18	1	3.62413	14.3483
chr1:2522061-2522236	6.48138	0.04	1.57164	0.0258616	0.98	1	6.34223	6.62228
chr1:2528012-2528345	12.7802	-0.42	1.07444	-0.386279	0.7	1	14.4965	11.0371
chr1:2562067-2562249	9.67643	-0.96	1.31054	-0.732028	0.46	1	12.6845	6.62228
chr1:2564163-2564458	48.7473	0.29	0.548512	0.533775	0.59	1	43.4896	54.0819
chr1:2564926-2565565	92.9303	-0.06	0.394319	-0.15816	0.87	1	94.2274	91.6082
chr1:2566442-2566668	18.44	0.03	0.874108	0.0326855	0.97	1	18.1207	18.7631
chr1:2600033-2600587	20.996	-1.5	0.934762	-1.60736	0.11	1	30.8051	11.0371
chr1:2607369-2607703	9.76772	-0.63	1.27734	-0.493251	0.62	1	11.7784	7.72599
chr1:2611402-2611613	6.84653	-0.58	1.54196	-0.37936	0.7	1	8.1543	5.51856
chr1:2613298-2613587	6.20752	1.26	1.68164	0.751074	0.45	1	3.62413	8.8297
chr1:2625964-2626766	26.1994	-0.23	0.741824	-0.312377	0.75	1	28.087	24.2817
chr1:2631621-2632140	15.4275	-0.02	0.955618	-0.0178646	0.99	1	15.4026	15.452
chr1:2647472-2647981	18.1661	0.42	0.887779	0.477034	0.63	1	15.4026	20.9705
chr1:2649901-2650188	10.2242	0.85	1.25006	0.678368	0.5	1	7.24826	13.2446
chr1:2654859-2655032	6.84653	-0.58	1.54196	-0.37936	0.7	1	8.1543	5.51856
chr1:2669690-2669897	8.67227	0.78	1.36535	0.56953	0.57	1	6.34223	11.0371
chr1:2672331-2672663	16.6143	-0.61	0.94111	-0.649692	0.52	1	19.9327	13.2446
chr1:2676477-2676776	12.0499	0.26	1.10496	0.23805	0.81	1	10.8724	13.2446
chr1:2684357-2684714	21.4525	-0.69	0.840575	-0.818552	0.41	1	26.275	16.5557
chr1:2685568-2685781	6.3901	-0.42	1.59686	-0.259905	0.79	1	7.24826	5.51856
chr1:2686401-2686779	6.66396	-1.61	1.6782	-0.960208	0.34	1	9.96636	3.31114
chr1:2698694-2699096	8.30713	-0.61	1.39375	-0.438696	0.66	1	9.96636	6.62228
chr1:2702953-2703327	5.20336	-1.91	2.00638	-0.950408	0.34	1	8.1543	2.20743
chr1:2715668-2716057	9.85901	-0.32	1.25474	-0.256567	0.8	1	10.8724	8.8297
chr1:2725054-2725320	6.66396	-1.61	1.6782	-0.960208	0.34	1	9.96636	3.31114
chr1:2735711-2736204	10.1329	-1.06	1.28601	-0.82339	0.41	1	13.5905	6.62228
chr1:2742762-2743058	6.93782	2.72	1.82339	1.49308	0.14	1	1.81207	12.1408
chr1:2743275-2743661	11.5935	-1.02	1.18382	-0.859143	0.39	1	15.4026	7.72599
chr1:2747042-2747569	13.4192	-0.06	1.03378	-0.0569671	0.95	1	13.5905	13.2446
chr1:2754251-2754491	9.12871	0.58	1.3175	0.443996	0.66	1	7.24826	11.0371
chr1:2759892-2760360	37.2451	-0.08	0.623822	-0.136077	0.89	1	38.0534	36.4225
chr1:2776962-2777438	26.7471	-0.17	0.732975	-0.228655	0.82	1	28.087	25.3854
chr1:2783337-2783562	10.7719	0.96	1.22089	0.789156	0.43	1	7.24826	14.3483
chr1:2785775-2786009	9.67643	0.72	1.28253	0.563316	0.57	1	7.24826	12.1408
chr1:2787589-2787850	6.75524	1.43	1.61973	0.884691	0.38	1	3.62413	9.93341
chr1:2793459-2793692	6.11624	0.75	1.65252	0.452923	0.65	1	4.53016	7.72599
chr1:2809880-2810139	9.31128	1.26	1.35695	0.930792	0.35	1	5.4362	13.2446
chr1:2810945-2811211	5.29465	-1.15	1.86855	-0.616517	0.54	1	7.24826	3.31114
chr1:2812222-2812596	23.0043	-0.56	0.80462	-0.691496	0.49	1	27.181	18.7631
chr1:2823249-2823692	4.83822	-0.96	1.96616	-0.48793	0.63	1	6.34223	3.31114
chr1:2823888-2824229	8.94614	1.96	1.47951	1.32711	0.18	1	3.62413	14.3483
chr1:2832477-2832721	8.76356	1.14	1.38753	0.819803	0.41	1	5.4362	12.1408
chr1:2836024-2836285	6.93782	2.72	1.82339	1.49308	0.14	1	1.81207	12.1408
chr1:2846642-2847183	20.6309	0.33	0.833179	0.400184	0.69	1	18.1207	23.178
chr1:2857946-2858357	7.30297	-0.74	1.49886	-0.49168	0.62	1	9.06033	5.51856
chr1:2861144-2861650	56.5067	-0.14	0.506016	-0.285807	0.78	1	58.8921	54.0819
chr1:2869438-2869618	7.30297	-0.74	1.49886	-0.49168	0.62	1	9.06033	5.51856
chr1:2873941-2874137	14.0582	0.26	1.0078	0.261	0.79	1	12.6845	15.452
chr1:2878477-2878918	19.9006	-0.03	0.843186	-0.0313937	0.97	1	19.9327	19.8668
chr1:2883310-2883690	8.94614	-0.06	1.31977	-0.0446222	0.96	1	9.06033	8.8297
chr1:2886066-2886455	9.85901	1.38	1.32761	1.03834	0.3	1	5.4362	14.3483
chr1:2888314-2888595	10.9545	0	1.17009	1.96929e-06	1	1	10.8724	11.0371
chr1:2890862-2891071	6.75524	-1.06	1.59368	-0.664429	0.51	1	9.06033	4.41485
chr1:2891079-2891343	6.66396	0.94	1.58124	0.595172	0.55	1	4.53016	8.8297
chr1:2892193-2892846	33.3198	-1.03	0.719997	-1.43021	0.15	1	44.3956	22.0743
chr1:2894243-2895228	30.855	0.5	0.695842	0.718661	0.47	1	25.3689	36.4225
chr1:2896757-2896998	12.0499	0.26	1.10496	0.23805	0.81	1	10.8724	13.2446
chr1:2901280-2901526	8.39841	-2.74	1.71121	-1.59943	0.11	1	14.4965	2.20743
chr1:2907787-2908189	10.498	0.13	1.20129	0.104498	0.92	1	9.96636	11.0371
chr1:2912400-2912573	7.39425	-0.32	1.46559	-0.219655	0.83	1	8.1543	6.62228
chr1:2912974-2913165	5.84237	2.43	1.93576	1.25684	0.21	1	1.81207	9.93341
chr1:2916116-2916772	45.9174	-0.62	0.586655	-1.06248	0.29	1	55.268	36.4225
chr1:2939897-2940291	14.3321	0.89	1.02887	0.866059	0.39	1	9.96636	18.7631
chr1:2940302-2940502	7.21168	-1.2	1.55342	-0.770166	0.44	1	9.96636	4.41485
chr1:2948793-2949039	10.0416	2.17	1.42824	1.5193	0.13	1	3.62413	16.5557
chr1:2966759-2967315	9.12871	0.58	1.3175	0.443996	0.66	1	7.24826	11.0371
chr1:2974381-2974554	5.38594	-0.54	1.79364	-0.30347	0.76	1	6.34223	4.41485
chr1:2978338-2978628	7.85069	-0.47	1.42695	-0.332125	0.74	1	9.06033	6.62228
chr1:2989586-2990113	78.3243	0.06	0.428119	0.141414	0.89	1	76.1068	80.571
chr1:3003596-3004173	10.6806	2.77	1.49537	1.8494	0.064	1	2.7181	18.7631
chr1:3006355-3006539	5.84237	-0.74	1.71213	-0.430435	0.67	1	7.24826	4.41485
chr1:3007735-3007908	5.47723	0	1.75508	2.10477e-06	1	1	5.4362	5.51856
chr1:3009945-3010332	10.3154	-0.44	1.2258	-0.356831	0.72	1	11.7784	8.8297
chr1:3030064-3030528	9.40257	-0.2	1.28616	-0.152698	0.88	1	9.96636	8.8297
chr1:3046616-3046787	6.93782	-0.15	1.51243	-0.1005	0.92	1	7.24826	6.62228
chr1:3056942-3057381	9.31128	-0.51	1.30589	-0.394037	0.69	1	10.8724	7.72599
chr1:3088082-3088331	8.58099	0.43	1.35537	0.319442	0.75	1	7.24826	9.93341
chr1:3105747-3106348	14.7885	-0.32	0.984151	-0.32711	0.74	1	16.3086	13.2446
chr1:3122104-3122499	5.38594	-0.54	1.79364	-0.30347	0.76	1	6.34223	4.41485
chr1:3127012-3127423	11.2283	-0.64	1.17555	-0.547702	0.58	1	13.5905	8.8297
chr1:3133826-3134120	7.85069	-0.47	1.42695	-0.332125	0.74	1	9.06033	6.62228
chr1:3138741-3139619	21.8176	-0.13	0.808271	-0.164416	0.87	1	22.6508	20.9705
chr1:3147386-3147648	7.94198	-0.1	1.40589	-0.0707967	0.94	1	8.1543	7.72599
chr1:3153992-3154290	9.03742	0.26	1.3137	0.200226	0.84	1	8.1543	9.93341
chr1:3171641-3172646	25.1952	1.85	1.66326	1.11107	0.27	1	10.8724	39.7337
chr1:3183553-3183726	7.48554	0.07	1.44884	0.0485852	0.96	1	7.24826	7.72599
chr1:3196452-3197222	22.9131	0.72	0.812018	0.881197	0.38	1	17.2146	28.6965
chr1:3197423-3199262	79.9675	0.32	0.430997	0.736624	0.46	1	70.6706	89.4007
chr1:3209648-3209927	7.57683	-1.85	1.60841	-1.15172	0.25	1	11.7784	3.31114
chr1:3210510-3211191	28.7554	-0.14	0.707817	-0.194262	0.85	1	29.8991	27.5928
chr1:3233317-3233706	5.6598	1.07	1.76332	0.607031	0.54	1	3.62413	7.72599
chr1:3254716-3255097	11.8673	1.17	1.17139	0.998749	0.32	1	7.24826	16.5557
chr1:3256408-3256664	8.76356	-0.74	1.36407	-0.540266	0.59	1	10.8724	6.62228
chr1:3260106-3260279	5.38594	-0.54	1.79364	-0.30347	0.76	1	6.34223	4.41485
chr1:3285024-3285291	7.21168	1.11	1.52886	0.726707	0.47	1	4.53016	9.93341
chr1:3297204-3297567	8.58099	0.43	1.35537	0.319442	0.75	1	7.24826	9.93341
chr1:3298155-3298497	5.93366	-0.22	1.66767	-0.133352	0.89	1	6.34223	5.51856
chr1:3298994-3299333	7.66812	-1.32	1.52075	-0.869254	0.38	1	10.8724	4.41485
chr1:3300762-3301015	7.21168	1.11	1.52886	0.726707	0.47	1	4.53016	9.93341
chr1:3301419-3301590	7.21168	1.11	1.52886	0.726707	0.47	1	4.53016	9.93341
chr1:3305539-3305956	7.7594	-0.87	1.46352	-0.597506	0.55	1	9.96636	5.51856
chr1:3310073-3310352	9.03742	0.26	1.3137	0.200226	0.84	1	8.1543	9.93341
chr1:3320701-3321138	46.5564	-0.51	0.574855	-0.895134	0.37	1	54.362	38.6299
chr1:3325183-3325478	12.3238	1	1.13024	0.884765	0.38	1	8.1543	16.5557
chr1:3332063-3332274	8.03326	0.26	1.39812	0.188136	0.85	1	7.24826	8.8297
chr1:3332471-3332851	11.0457	0.26	1.166	0.225588	0.82	1	9.96636	12.1408
chr1:3349024-3349381	12.415	-0.08	1.08371	-0.0783294	0.94	1	12.6845	12.1408
chr1:3351370-3351597	5.6598	1.07	1.76332	0.607031	0.54	1	3.62413	7.72599
chr1:3362186-3362499	5.56851	0.53	1.74498	0.301476	0.76	1	4.53016	6.62228
chr1:3368456-3368789	6.29881	1.85	1.74517	1.05892	0.29	1	2.7181	9.93341
chr1:3374229-3374419	4.65564	-2.91	2.41067	-1.20583	0.23	1	8.1543	1.10371
chr1:3377071-3377381	7.02911	0.26	1.50085	0.175259	0.86	1	6.34223	7.72599
chr1:3407145-3407500	5.02079	0.26	1.86561	0.140993	0.89	1	4.53016	5.51856
chr1:3415515-3415796	7.39425	-0.32	1.46559	-0.219655	0.83	1	8.1543	6.62228
chr1:3434452-3435330	32.4069	-0.97	0.722151	-1.34269	0.18	1	42.5835	22.0743
chr1:3445675-3446114	7.12039	-1.74	1.63965	-1.05934	0.29	1	10.8724	3.31114
chr1:3456045-3456359	6.3901	2.58	1.87107	1.38154	0.17	1	1.81207	11.0371
chr1:3460220-3460441	5.93366	-0.22	1.66767	-0.133352	0.89	1	6.34223	5.51856
chr1:3468735-3468908	5.93366	-0.22	1.66767	-0.133352	0.89	1	6.34223	5.51856
chr1:3494215-3494449	8.76356	1.14	1.38753	0.819803	0.41	1	5.4362	12.1408
chr1:3530201-3530429	5.84237	2.43	1.93576	1.25684	0.21	1	1.81207	9.93341
chr1:3544135-3544354	7.94198	-0.1	1.40589	-0.0707967	0.94	1	8.1543	7.72599
chr1:3553436-3553624	5.6598	-2.06	1.93184	-1.06576	0.29	1	9.06033	2.20743
chr1:3558626-3558886	6.66396	-1.61	1.6782	-0.960208	0.34	1	9.96636	3.31114
chr1:3578640-3579008	11.0457	1.94	1.32075	1.4697	0.14	1	4.53016	17.6594
chr1:3591063-3591240	7.39425	-0.32	1.46559	-0.219655	0.83	1	8.1543	6.62228
chr1:3613714-3614063	14.1495	1.78	1.13589	1.56494	0.12	1	6.34223	22.0743
chr1:3619746-3620030	8.30713	1.4	1.45417	0.963116	0.34	1	4.53016	12.1408
chr1:3626461-3626686	6.75524	-1.06	1.59368	-0.664429	0.51	1	9.06033	4.41485
chr1:3628418-3628589	5.29465	2.26	2.01837	1.12121	0.26	1	1.81207	8.8297
chr1:3634183-3634354	5.02079	0.26	1.86561	0.140993	0.89	1	4.53016	5.51856
chr1:3636282-3636472	7.85069	-0.47	1.42695	-0.332125	0.74	1	9.06033	6.62228
chr1:3642566-3642798	5.75109	-1.32	1.79105	-0.738068	0.46	1	8.1543	3.31114
chr1:3643181-3643738	5.29465	2.26	2.01837	1.12121	0.26	1	1.81207	8.8297
chr1:3650219-3650606	18.8964	-0.04	0.864307	-0.048384	0.96	1	19.0267	18.7631
chr1:3652314-3652676	7.7594	-0.87	1.46352	-0.597506	0.55	1	9.96636	5.51856
chr1:3665021-3665316	10.6806	0.68	1.20674	0.561906	0.57	1	8.1543	13.2446
chr1:3670756-3671443	28.299	-0.09	0.71243	-0.130691	0.9	1	28.9931	27.5928
chr1:3674462-3675112	73.3035	0.05	0.442311	0.10562	0.92	1	71.5766	75.0525
chr1:3715184-3715495	6.66396	0.94	1.58124	0.595172	0.55	1	4.53016	8.8297
chr1:3718768-3718998	8.30713	1.4	1.45417	0.963116	0.34	1	4.53016	12.1408
chr1:3725585-3725960	10.4067	-0.15	1.20964	-0.125658	0.9	1	10.8724	9.93341
chr1:3738740-3739003	9.67643	0.72	1.28253	0.563316	0.57	1	7.24826	12.1408
chr1:3740679-3740868	6.29881	1.85	1.74517	1.05892	0.29	1	2.7181	9.93341
chr1:3742602-3742797	6.75524	-1.06	1.59368	-0.664429	0.51	1	9.06033	4.41485
chr1:3744940-3745572	20.9047	-0.01	0.823591	-0.0152971	0.99	1	20.8388	20.9705
chr1:3750326-3750700	16.2491	0.63	0.94678	0.660772	0.51	1	12.6845	19.8668
chr1:3771838-3772279	11.776	-0.47	1.13208	-0.418636	0.68	1	13.5905	9.93341
chr1:3779867-3780166	10.2242	-0.74	1.25064	-0.589267	0.56	1	12.6845	7.72599
chr1:3792879-3793301	6.84653	2	1.69066	1.18297	0.24	1	2.7181	11.0371
chr1:3797627-3797836	8.94614	-0.06	1.31977	-0.0446222	0.96	1	9.06033	8.8297
chr1:3813943-3814114	7.94198	-0.1	1.40589	-0.0707967	0.94	1	8.1543	7.72599
chr1:3820843-3821014	5.20336	1.49	1.91129	0.777186	0.44	1	2.7181	7.72599
chr1:3833453-3833665	5.93366	3.58	2.23532	1.60377	0.11	1	0.906033	11.0371
chr1:3851489-3851992	26.9297	0.05	0.728435	0.0671451	0.95	1	26.275	27.5928
chr1:3857658-3857848	8.39841	1.85	1.50697	1.22629	0.22	1	3.62413	13.2446
chr1:3860290-3860915	51.3946	0.38	0.537727	0.699696	0.48	1	44.3956	58.4968
chr1:3865625-3865827	7.48554	0.07	1.44884	0.0485852	0.96	1	7.24826	7.72599
chr1:3869998-3870192	9.03742	2.49	1.56518	1.58794	0.11	1	2.7181	15.452
chr1:3882256-3882545	13.5105	0.16	1.02961	0.151631	0.88	1	12.6845	14.3483
chr1:3882808-3883298	37.9754	0.11	0.617488	0.179813	0.86	1	36.2413	39.7337
chr1:3898143-3898674	31.3115	-0.06	0.678822	-0.0867569	0.93	1	31.7111	30.904
chr1:3904045-3904343	9.31128	-0.51	1.30589	-0.394037	0.69	1	10.8724	7.72599
chr1:3905154-3905407	10.0416	2.17	1.42824	1.5193	0.13	1	3.62413	16.5557
chr1:3907939-3908262	9.85901	1.38	1.32761	1.03834	0.3	1	5.4362	14.3483
chr1:3918738-3919095	14.6972	-0.53	0.99687	-0.527109	0.6	1	17.2146	12.1408
chr1:3929498-3929718	7.39425	2.14	1.65027	1.29524	0.2	1	2.7181	12.1408
chr1:3935603-3935902	6.66396	0.94	1.58124	0.595172	0.55	1	4.53016	8.8297
chr1:3947773-3947987	8.58099	0.43	1.35537	0.319442	0.75	1	7.24826	9.93341
chr1:3968246-3968656	11.8673	1.17	1.17139	0.998749	0.32	1	7.24826	16.5557
chr1:3974486-3974696	8.39841	-0.25	1.369	-0.183736	0.85	1	9.06033	7.72599
chr1:3982761-3983051	9.03742	0.26	1.3137	0.200226	0.84	1	8.1543	9.93341
chr1:3990417-3990874	55.5026	-0.15	0.510796	-0.297579	0.77	1	57.9861	52.9782
chr1:4010438-4010929	16.4317	0	0.924969	1.81724e-06	1	1	16.3086	16.5557
chr1:4016795-4017047	6.84653	2	1.69066	1.18297	0.24	1	2.7181	11.0371
chr1:4026079-4026289	5.29465	-1.15	1.86855	-0.616517	0.54	1	7.24826	3.31114
chr1:4035143-4035429	8.39841	-0.25	1.369	-0.183736	0.85	1	9.06033	7.72599
chr1:4036876-4037395	15.1537	0.46	0.972781	0.468431	0.64	1	12.6845	17.6594
chr1:4042568-4042849	9.49386	0.11	1.27602	0.0870155	0.93	1	9.06033	9.93341
chr1:4045008-4045188	8.4897	0.09	1.35656	0.0686382	0.95	1	8.1543	8.8297
chr1:4050537-4050854	6.20752	-1.47	1.72824	-0.852846	0.39	1	9.06033	3.31114
chr1:4054729-4055129	16.9794	0.09	0.90997	0.102323	0.92	1	16.3086	17.6594
chr1:4064101-4064437	9.49386	-1.74	1.42217	-1.22134	0.22	1	14.4965	4.41485
chr1:4068548-4068719	5.6598	1.07	1.76332	0.607031	0.54	1	3.62413	7.72599
chr1:4070824-4070997	7.02911	0.26	1.50085	0.175259	0.86	1	6.34223	7.72599
chr1:4078083-4078301	5.6598	-2.06	1.93184	-1.06576	0.29	1	9.06033	2.20743
chr1:4079974-4080259	10.8632	1.26	1.24344	1.01576	0.31	1	6.34223	15.452
chr1:4124525-4124943	20.8135	-0.94	0.873752	-1.07973	0.28	1	27.181	14.3483
chr1:4143273-4143506	5.11208	0.85	1.86879	0.453769	0.65	1	3.62413	6.62228
chr1:4162999-4163271	7.21168	-1.2	1.55342	-0.770166	0.44	1	9.96636	4.41485
chr1:4164603-4164864	14.8798	-0.12	0.975568	-0.127092	0.9	1	15.4026	14.3483
chr1:4170264-4170506	9.49386	2.07	1.45349	1.42443	0.15	1	3.62413	15.452
chr1:4204686-4204961	7.21168	1.11	1.52886	0.726707	0.47	1	4.53016	9.93341
chr1:4213918-4214108	8.85485	-0.39	1.33613	-0.291168	0.77	1	9.96636	7.72599
chr1:4236225-4236812	14.6059	0.36	0.988966	0.366617	0.71	1	12.6845	16.5557
chr1:4249474-4249645	6.20752	1.26	1.68164	0.751074	0.45	1	3.62413	8.8297
chr1:4257060-4257350	9.31128	1.26	1.35695	0.930792	0.35	1	5.4362	13.2446
chr1:4271592-4271963	8.21584	1	1.42087	0.703795	0.48	1	5.4362	11.0371
chr1:4323444-4323812	19.079	-0.57	0.879164	-0.652284	0.51	1	22.6508	15.452
chr1:4328782-4329172	15.3362	0.85	0.989744	0.856785	0.39	1	10.8724	19.8668
chr1:4332736-4332953	6.84653	-0.58	1.54196	-0.37936	0.7	1	8.1543	5.51856
chr1:4351427-4351624	6.20752	-1.47	1.72824	-0.852846	0.39	1	9.06033	3.31114
chr1:4371706-4371999	9.76772	1.04	1.29975	0.80065	0.42	1	6.34223	13.2446
chr1:4378717-4378893	8.12455	0.63	1.40293	0.445928	0.66	1	6.34223	9.93341
chr1:4390942-4391151	5.02079	0.26	1.86561	0.140993	0.89	1	4.53016	5.51856
chr1:4395635-4395951	8.21584	1	1.42087	0.703795	0.48	1	5.4362	11.0371
chr1:4400317-4400615	5.6598	1.07	1.76332	0.607031	0.54	1	3.62413	7.72599
chr1:4426779-4426952	4.74693	-1.74	2.09998	-0.827128	0.41	1	7.24826	2.20743
chr1:4434323-4434574	6.11624	-2.2	1.87197	-1.1733	0.24	1	9.96636	2.20743
chr1:4452010-4452990	88.5485	-0.21	0.407067	-0.512413	0.61	1	94.2274	82.7785
chr1:4458994-4459361	6.75524	1.43	1.61973	0.884691	0.38	1	3.62413	9.93341
chr1:4461330-4461711	6.57267	-2.32	1.82361	-1.27325	0.2	1	10.8724	2.20743
chr1:4480229-4480950	53.5855	-0.11	0.519159	-0.217878	0.83	1	55.268	51.8745
chr1:4483456-4483753	6.93782	-0.15	1.51243	-0.1005	0.92	1	7.24826	6.62228
chr1:4484639-4484908	13.6931	0.58	1.0349	0.565238	0.57	1	10.8724	16.5557
chr1:4487992-4488245	10.2242	0.85	1.25006	0.678368	0.5	1	7.24826	13.2446
chr1:4493328-4493519	5.02079	0.26	1.86561	0.140993	0.89	1	4.53016	5.51856
chr1:4494098-4494527	11.5022	1.68	1.25363	1.33857	0.18	1	5.4362	17.6594
chr1:4501214-4501909	17.2533	0.6	0.918411	0.657737	0.51	1	13.5905	20.9705
chr1:4502366-4502908	33.3198	0.44	0.66838	0.655499	0.51	1	28.087	38.6299
chr1:4507998-4508362	30.855	-0.54	0.701255	-0.763389	0.45	1	36.2413	25.3854
chr1:4512438-4513019	37.3364	-0.01	0.622384	-0.0113335	0.99	1	37.1473	37.5262
chr1:4514209-4514696	23.9172	0.7	0.794432	0.876092	0.38	1	18.1207	29.8002
chr1:4520752-4521357	40.5315	0.16	0.598147	0.261006	0.79	1	38.0534	43.0448
chr1:4528808-4529293	19.9006	-0.03	0.843186	-0.0313937	0.97	1	19.9327	19.8668
chr1:4538771-4539119	12.9628	0.04	1.05477	0.0385336	0.97	1	12.6845	13.2446
chr1:4540241-4540472	12.3238	-0.32	1.09453	-0.294123	0.77	1	13.5905	11.0371
chr1:4545291-4545464	7.94198	-0.1	1.40589	-0.0707967	0.94	1	8.1543	7.72599
chr1:4549123-4549709	24.0998	-0.4	0.778236	-0.50875	0.61	1	27.181	20.9705
chr1:4552601-4552953	22.8218	0.58	0.805158	0.726521	0.47	1	18.1207	27.5928
chr1:4557184-4557705	96.3992	0.1	0.387813	0.253741	0.8	1	92.4154	100.438
chr1:4562219-4562414	16.8881	-0.08	0.913039	-0.0854298	0.93	1	17.2146	16.5557
chr1:4563008-4563430	29.577	0.77	0.727056	1.05292	0.29	1	21.7448	37.5262
chr1:4565681-4566121	53.3117	0.02	0.519326	0.038057	0.97	1	52.5499	54.0819
chr1:4573688-4574243	33.8675	0.48	0.665293	0.719629	0.47	1	28.087	39.7337
chr1:4580952-4581334	28.2077	-0.2	0.715547	-0.27447	0.78	1	29.8991	26.4891
chr1:4584577-4584973	31.3115	-0.57	0.698856	-0.816984	0.41	1	37.1473	25.3854
chr1:4589045-4589299	21.0873	0.26	0.822699	0.319723	0.75	1	19.0267	23.178
chr1:4594667-4595057	23.0043	-0.56	0.80462	-0.691496	0.49	1	27.181	18.7631
chr1:4595585-4595825	15.2449	-0.4	0.971359	-0.41172	0.68	1	17.2146	13.2446
chr1:4596564-4596995	15.1537	-0.6	0.985091	-0.608532	0.54	1	18.1207	12.1408
chr1:4604921-4605960	28.299	0.47	0.722342	0.64995	0.52	1	23.5569	33.1114
chr1:4623389-4624380	16.4317	0	0.924969	1.81724e-06	1	1	16.3086	16.5557
chr1:4634244-4634580	19.1703	-0.42	0.868685	-0.477775	0.63	1	21.7448	16.5557
chr1:4640378-4640623	9.67643	-0.96	1.31054	-0.732028	0.46	1	12.6845	6.62228
chr1:4642412-4642730	27.2036	-0.81	0.763477	-1.06744	0.29	1	34.4292	19.8668
chr1:4644895-4646096	94.9386	-0.22	0.394573	-0.563627	0.57	1	101.476	88.297
chr1:4650880-4651191	5.38594	-0.54	1.79364	-0.30347	0.76	1	6.34223	4.41485
chr1:4651731-4652115	24.1911	-0.96	0.817857	-1.17301	0.24	1	31.7111	16.5557
chr1:4658437-4658639	5.29465	2.26	2.01837	1.12121	0.26	1	1.81207	8.8297
chr1:4670040-4670261	11.5022	0.14	1.13539	0.121109	0.9	1	10.8724	12.1408
chr1:4683279-4683484	12.415	-0.08	1.08371	-0.0783294	0.94	1	12.6845	12.1408
chr1:4687363-4687804	51.9424	-0.21	0.529745	-0.393153	0.69	1	55.268	48.5634
chr1:4696315-4697109	52.4901	-0.18	0.526023	-0.334299	0.74	1	55.268	49.6671
chr1:4701291-4701482	6.84653	-0.58	1.54196	-0.37936	0.7	1	8.1543	5.51856
chr1:4702193-4702364	10.1329	0.55	1.23895	0.445976	0.66	1	8.1543	12.1408
chr1:4704563-4705042	51.2121	-0.05	0.530348	-0.0872876	0.93	1	51.6439	50.7708
chr1:4710115-4710527	37.9754	-0.74	0.65115	-1.13179	0.26	1	47.1137	28.6965
chr1:4712479-4713131	31.8592	-1.04	0.735276	-1.41937	0.16	1	42.5835	20.9705
chr1:4724192-4724402	4.83822	-0.96	1.96616	-0.48793	0.63	1	6.34223	3.31114
chr1:4724556-4724800	19.8093	0.64	0.862923	0.735876	0.46	1	15.4026	24.2817
chr1:4724961-4725134	8.58099	0.43	1.35537	0.319442	0.75	1	7.24826	9.93341
chr1:4757116-4758074	38.158	0.26	0.619043	0.424906	0.67	1	34.4292	41.9411
chr1:4760103-4760316	8.58099	-1.54	1.46747	-1.05236	0.29	1	12.6845	4.41485
chr1:4767786-4767959	6.3901	-0.42	1.59686	-0.259905	0.79	1	7.24826	5.51856
chr1:4780366-4780539	6.93782	-0.15	1.51243	-0.1005	0.92	1	7.24826	6.62228
chr1:4783349-4783540	8.12455	0.63	1.40293	0.445928	0.66	1	6.34223	9.93341
chr1:4786658-4787061	13.2366	0.71	1.0626	0.66864	0.5	1	9.96636	16.5557
chr1:4787907-4788141	7.57683	-1.85	1.60841	-1.15172	0.25	1	11.7784	3.31114
chr1:4796683-4796856	4.65564	-2.91	2.41067	-1.20583	0.23	1	8.1543	1.10371
chr1:4797118-4797305	5.29465	2.26	2.01837	1.12121	0.26	1	1.81207	8.8297
chr1:4805209-4805653	12.3238	1	1.13024	0.884765	0.38	1	8.1543	16.5557
chr1:4809258-4809457	5.11208	0.85	1.86879	0.453769	0.65	1	3.62413	6.62228
chr1:4814410-4814596	5.29465	2.26	2.01837	1.12121	0.26	1	1.81207	8.8297
chr1:4822527-4822806	5.93366	-0.22	1.66767	-0.133352	0.89	1	6.34223	5.51856
chr1:4826373-4826672	20.1744	0.41	0.844531	0.482428	0.63	1	17.2146	23.178
chr1:4831338-4831818	11.0457	-1.24	1.24192	-0.998023	0.32	1	15.4026	6.62228
chr1:4844676-4844847	6.48138	0.04	1.57164	0.0258616	0.98	1	6.34223	6.62228
chr1:4844983-4845508	55.8677	-0.23	0.511251	-0.443559	0.66	1	59.7982	51.8745
chr1:4850356-4850697	8.94614	-0.06	1.31977	-0.0446222	0.96	1	9.06033	8.8297
chr1:4854764-4855161	5.11208	0.85	1.86879	0.453769	0.65	1	3.62413	6.62228
chr1:4856185-4856538	9.95029	1.75	1.36872	1.27744	0.2	1	4.53016	15.452
chr1:4860399-4860650	7.30297	1.58	1.57349	1.00729	0.31	1	3.62413	11.0371
chr1:4866697-4867248	16.7055	-0.43	0.928447	-0.461891	0.64	1	19.0267	14.3483
chr1:4871880-4872089	9.49386	0.11	1.27602	0.0870155	0.93	1	9.06033	9.93341
chr1:4873332-4873791	9.76772	-0.63	1.27734	-0.493251	0.62	1	11.7784	7.72599
chr1:4875919-4876096	6.3901	-0.42	1.59686	-0.259905	0.79	1	7.24826	5.51856
chr1:4878892-4879085	7.66812	-1.32	1.52075	-0.869254	0.38	1	10.8724	4.41485
chr1:4890576-4890940	12.2325	-0.57	1.11123	-0.510282	0.61	1	14.4965	9.93341
chr1:4891683-4891884	5.93366	3.58	2.23532	1.60377	0.11	1	0.906033	11.0371
chr1:4895588-4896047	22.5479	-0.51	0.809486	-0.626919	0.53	1	26.275	18.7631
chr1:4905971-4906289	6.75524	-1.06	1.59368	-0.664429	0.51	1	9.06033	4.41485
chr1:4912942-4913416	12.6889	-0.65	1.09254	-0.599061	0.55	1	15.4026	9.93341
chr1:4913716-4913889	6.48138	0.04	1.57164	0.0258616	0.98	1	6.34223	6.62228
chr1:4918167-4918522	25.1952	0.38	0.758397	0.499096	0.62	1	21.7448	28.6965
chr1:4922464-4922637	5.29465	-1.15	1.86855	-0.616517	0.54	1	7.24826	3.31114
chr1:4925168-4925410	10.2242	-0.74	1.25064	-0.589267	0.56	1	12.6845	7.72599
chr1:4927179-4927764	19.2616	-0.26	0.860788	-0.30266	0.76	1	20.8388	17.6594
chr1:4936262-4936717	15.7014	-1.63	1.07525	-1.51597	0.13	1	23.5569	7.72599
chr1:4938823-4939289	27.2948	0.48	0.734794	0.649379	0.52	1	22.6508	32.0077
chr1:4945017-4945188	6.29881	1.85	1.74517	1.05892	0.29	1	2.7181	9.93341
chr1:4948215-4948499	7.85069	-0.47	1.42695	-0.332125	0.74	1	9.06033	6.62228
chr1:4951489-4951660	5.11208	0.85	1.86879	0.453769	0.65	1	3.62413	6.62228
chr1:4961951-4962258	13.5105	0.16	1.02961	0.151631	0.88	1	12.6845	14.3483
chr1:4963503-4964286	43.7265	0.67	0.600644	1.11263	0.27	1	33.5232	54.0819
chr1:4967504-4967829	12.5976	0.38	1.07834	0.351016	0.73	1	10.8724	14.3483
chr1:4987886-4988558	25.9255	0.04	0.741691	0.054798	0.96	1	25.3689	26.4891
chr1:4991445-4991902	29.1206	-0.28	0.707514	-0.397568	0.69	1	31.7111	26.4891
chr1:4997031-4997483	34.4152	0.05	0.648204	0.0826623	0.93	1	33.5232	35.3188
chr1:4997632-4997933	12.415	-0.08	1.08371	-0.0783294	0.94	1	12.6845	12.1408
chr1:5006642-5007043	19.8093	-0.17	0.847149	-0.204289	0.84	1	20.8388	18.7631
chr1:5011661-5012287	64.9964	-0.36	0.479889	-0.746951	0.46	1	72.4826	57.3931
chr1:5013830-5014169	35.5107	-0.77	0.67436	-1.13695	0.26	1	44.3956	26.4891
chr1:5023517-5023770	11.4109	-0.12	1.1421	-0.101108	0.92	1	11.7784	11.0371
chr1:5030099-5030546	18.7139	0.5	0.878555	0.566272	0.57	1	15.4026	22.0743
chr1:5032766-5033065	15.4275	-0.02	0.955618	-0.0178646	0.99	1	15.4026	15.452
chr1:5038090-5038398	12.415	-0.08	1.08371	-0.0783294	0.94	1	12.6845	12.1408
chr1:5045235-5045445	13.0541	1.63	1.16266	1.39817	0.16	1	6.34223	19.8668
chr1:5046311-5046605	14.2408	-0.45	1.01029	-0.442901	0.66	1	16.3086	12.1408
chr1:5047401-5047572	12.8715	-0.18	1.062	-0.173656	0.86	1	13.5905	12.1408
chr1:5047800-5048569	100.051	0.31	0.388297	0.789438	0.43	1	88.7912	111.475
chr1:5053653-5053861	5.56851	-3.2	2.253	-1.41872	0.16	1	9.96636	1.10371
chr1:5053913-5054419	27.2036	-0.21	0.728276	-0.293024	0.77	1	28.9931	25.3854
chr1:5065932-5066393	36.3323	-0.01	0.631014	-0.0229766	0.98	1	36.2413	36.4225
chr1:5071550-5071750	6.75524	1.43	1.61973	0.884691	0.38	1	3.62413	9.93341
chr1:5076053-5076280	10.3154	-0.44	1.2258	-0.356831	0.72	1	11.7784	8.8297
chr1:5078726-5079168	33.2285	-0.13	0.660729	-0.192077	0.85	1	34.4292	32.0077
chr1:5080701-5081112	14.2408	0.68	1.01743	0.66646	0.51	1	10.8724	17.6594
chr1:5081326-5081985	53.5855	-0.41	0.530526	-0.774206	0.44	1	60.7042	46.3559
chr1:5087593-5088006	8.58099	-1.54	1.46747	-1.05236	0.29	1	12.6845	4.41485
chr1:5088382-5088607	9.31128	-0.51	1.30589	-0.394037	0.69	1	10.8724	7.72599
chr1:5091244-5091415	5.84237	2.43	1.93576	1.25684	0.21	1	1.81207	9.93341
chr1:5091673-5092102	11.5022	0.14	1.13539	0.121109	0.9	1	10.8724	12.1408
chr1:5105520-5105763	13.3279	-0.28	1.04266	-0.266176	0.79	1	14.4965	12.1408
chr1:5109483-5110478	93.3867	-0.08	0.393599	-0.193525	0.85	1	95.1334	91.6082
chr1:5115193-5115449	12.1412	0.5	1.10752	0.455112	0.65	1	9.96636	14.3483
chr1:5116934-5117244	10.498	1.85	1.34358	1.37542	0.17	1	4.53016	16.5557
chr1:5120117-5120395	5.6598	-2.06	1.93184	-1.06576	0.29	1	9.06033	2.20743
chr1:5121315-5121488	7.48554	0.07	1.44884	0.0485852	0.96	1	7.24826	7.72599
chr1:5121748-5121969	8.94614	1.96	1.47951	1.32711	0.18	1	3.62413	14.3483
chr1:5124181-5124561	13.0541	-0.98	1.10148	-0.894151	0.37	1	17.2146	8.8297
chr1:5135824-5136054	9.40257	-0.2	1.28616	-0.152698	0.88	1	9.96636	8.8297
chr1:5139201-5139436	7.48554	2.85	1.78771	1.59309	0.11	1	1.81207	13.2446
chr1:5140893-5141202	11.8673	-1.74	1.2579	-1.38084	0.17	1	18.1207	5.51856
chr1:5145383-5145875	28.6641	-0.24	0.711384	-0.336618	0.74	1	30.8051	26.4891
chr1:5151100-5151447	11.6847	0.64	1.14053	0.562498	0.57	1	9.06033	14.3483
chr1:5153444-5153753	10.1329	0.55	1.23895	0.445976	0.66	1	8.1543	12.1408
chr1:5154906-5155218	5.47723	6.03	6.7818	0.888749	0.37	1	0	11.0371
chr1:5160274-5160641	20.357	0.7	0.856394	0.81637	0.41	1	15.4026	25.3854
chr1:5168197-5168755	11.3196	-0.37	1.15529	-0.324068	0.75	1	12.6845	9.93341
chr1:5168815-5169134	8.85485	1.53	1.424	1.07168	0.28	1	4.53016	13.2446
chr1:5175044-5175286	8.94614	-0.06	1.31977	-0.0446222	0.96	1	9.06033	8.8297
chr1:5177421-5177776	9.58514	-1.32	1.35699	-0.974157	0.33	1	13.5905	5.51856
chr1:5182351-5182578	6.66396	-1.61	1.6782	-0.960208	0.34	1	9.96636	3.31114
chr1:5200199-5200534	16.1578	-0.54	0.950033	-0.572946	0.57	1	19.0267	13.2446
chr1:5203088-5203417	36.1497	-0.18	0.634937	-0.275753	0.78	1	38.0534	34.2151
chr1:5205810-5206103	26.4733	0.1	0.734596	0.135499	0.89	1	25.3689	27.5928
chr1:5207126-5207433	24.3737	0.63	0.782882	0.799106	0.42	1	19.0267	29.8002
chr1:5214989-5215236	4.74693	-1.74	2.09998	-0.827128	0.41	1	7.24826	2.20743
chr1:5217954-5218146	6.29881	-0.91	1.6459	-0.550997	0.58	1	8.1543	4.41485
chr1:5220254-5220456	10.0416	0.26	1.23607	0.2128	0.83	1	9.06033	11.0371
chr1:5223267-5223601	14.6972	1.85	1.12533	1.64218	0.1	1	6.34223	23.178
chr1:5226297-5226636	23.1869	0.39	0.789737	0.49202	0.62	1	19.9327	26.4891
chr1:5228999-5229337	7.85069	1.72	1.53732	1.12043	0.26	1	3.62413	12.1408
chr1:5236486-5236826	17.7097	0.51	0.902324	0.566275	0.57	1	14.4965	20.9705
chr1:5239011-5239243	7.85069	-0.47	1.42695	-0.332125	0.74	1	9.06033	6.62228
chr1:5241662-5241923	13.2366	-0.5	1.05653	-0.47561	0.63	1	15.4026	11.0371
chr1:5245301-5245988	23.1869	-0.3	0.788961	-0.375673	0.71	1	25.3689	20.9705
chr1:5253033-5253313	8.21584	1	1.42087	0.703795	0.48	1	5.4362	11.0371
chr1:5260847-5261134	11.5935	0.39	1.13488	0.342386	0.73	1	9.96636	13.2446
chr1:5262889-5263146	9.12871	-1.22	1.3813	-0.884957	0.38	1	12.6845	5.51856
chr1:5264867-5265132	8.67227	0.78	1.36535	0.56953	0.57	1	6.34223	11.0371
chr1:5278871-5279292	20.1744	-0.38	0.846635	-0.449804	0.65	1	22.6508	17.6594
chr1:5285197-5285450	8.58099	3.07	1.73385	1.77085	0.077	1	1.81207	15.452
chr1:5287634-5287895	7.48554	2.85	1.78771	1.59309	0.11	1	1.81207	13.2446
chr1:5313074-5313245	6.75524	1.43	1.61973	0.884691	0.38	1	3.62413	9.93341
chr1:5316844-5317109	16.6143	-0.61	0.94111	-0.649692	0.52	1	19.9327	13.2446
chr1:5318229-5318549	11.5935	-1.02	1.18382	-0.859143	0.39	1	15.4026	7.72599
chr1:5320321-5320717	17.5271	-0.74	0.926159	-0.79572	0.43	1	21.7448	13.2446
chr1:5323245-5324009	35.3281	-0.02	0.63997	-0.0349497	0.97	1	35.3353	35.3188
chr1:5326856-5327131	10.498	0.13	1.20129	0.104498	0.92	1	9.96636	11.0371
chr1:5328841-5329052	5.20336	1.49	1.91129	0.777186	0.44	1	2.7181	7.72599
chr1:5339343-5339780	12.1412	0.5	1.10752	0.455112	0.65	1	9.96636	14.3483
chr1:5342723-5343116	17.6184	0.35	0.89815	0.384677	0.7	1	15.4026	19.8668
chr1:5345485-5346185	36.4236	0.07	0.630223	0.10329	0.92	1	35.3353	37.5262
chr1:5347177-5347486	16.7055	-0.43	0.928447	-0.461891	0.64	1	19.0267	14.3483
chr1:5374864-5375164	14.2408	-0.45	1.01029	-0.442901	0.66	1	16.3086	12.1408
chr1:5385866-5386092	16.9794	0.09	0.90997	0.102323	0.92	1	16.3086	17.6594
chr1:5386885-5387294	16.523	0.18	0.923147	0.19019	0.85	1	15.4026	17.6594
chr1:5387823-5388076	9.85901	-0.32	1.25474	-0.256567	0.8	1	10.8724	8.8297
chr1:5394694-5394865	5.56851	0.53	1.74498	0.301476	0.76	1	4.53016	6.62228
chr1:5395338-5395693	8.76356	1.14	1.38753	0.819803	0.41	1	5.4362	12.1408
chr1:5411550-5411750	7.85069	-0.47	1.42695	-0.332125	0.74	1	9.06033	6.62228
chr1:5423840-5424109	15.7927	-0.28	0.949254	-0.299658	0.76	1	17.2146	14.3483
chr1:5426845-5427186	36.1497	-0.18	0.634937	-0.275753	0.78	1	38.0534	34.2151
chr1:5428143-5428458	5.93366	3.58	2.23532	1.60377	0.11	1	0.906033	11.0371
chr1:5436747-5437579	78.6895	-0.19	0.430369	-0.451793	0.65	1	83.355	73.9488
chr1:5442156-5442342	8.85485	-0.39	1.33613	-0.291168	0.77	1	9.96636	7.72599
chr1:5463614-5464448	59.2453	-0.27	0.498118	-0.546059	0.59	1	64.3283	54.0819
chr1:5465049-5465307	15.0624	-0.81	1.00334	-0.804668	0.42	1	19.0267	11.0371
chr1:5473684-5474136	42.7224	-0.45	0.59522	-0.751752	0.45	1	48.9258	36.4225
chr1:5478089-5478262	5.93366	-0.22	1.66767	-0.133352	0.89	1	6.34223	5.51856
chr1:5492005-5492692	85.1709	-0.36	0.42219	-0.861573	0.39	1	95.1334	75.0525
chr1:5527464-5527849	21.4525	0.06	0.813355	0.0754922	0.94	1	20.8388	22.0743
chr1:5546020-5546560	21.1786	-0.35	0.826214	-0.423547	0.67	1	23.5569	18.7631
chr1:5575978-5576331	8.30713	-0.61	1.39375	-0.438696	0.66	1	9.96636	6.62228
chr1:5578613-5579124	46.1	0.2	0.561344	0.356821	0.72	1	42.5835	49.6671
chr1:5585042-5585213	10.4067	-0.15	1.20964	-0.125658	0.9	1	10.8724	9.93341
chr1:5586342-5586641	34.6891	-1.12	0.717374	-1.55494	0.12	1	47.1137	22.0743
chr1:5588966-5589212	18.7139	-1.27	0.950984	-1.33863	0.18	1	26.275	11.0371
chr1:5605285-5605458	7.39425	-0.32	1.46559	-0.219655	0.83	1	8.1543	6.62228
chr1:5619552-5619725	10.5893	0.4	1.20034	0.333688	0.74	1	9.06033	12.1408
chr1:5622882-5623360	46.0087	-0.56	0.580976	-0.957685	0.34	1	54.362	37.5262
chr1:5628396-5629027	29.4857	-0.99	0.754155	-1.31711	0.19	1	38.9594	19.8668
chr1:5634139-5634610	21.2699	-0.21	0.819916	-0.257216	0.8	1	22.6508	19.8668
chr1:5636383-5636689	10.4067	-0.15	1.20964	-0.125658	0.9	1	10.8724	9.93341
chr1:5643361-5643722	7.7594	1.26	1.48812	0.848744	0.4	1	4.53016	11.0371
chr1:5664468-5664639	5.38594	3.43	2.30661	1.48831	0.14	1	0.906033	9.93341
chr1:5666902-5667076	6.84653	-0.58	1.54196	-0.37936	0.7	1	8.1543	5.51856
chr1:5672793-5673657	36.0584	-0.71	0.664743	-1.0648	0.29	1	44.3956	27.5928
chr1:5688681-5689052	15.2449	-0.4	0.971359	-0.41172	0.68	1	17.2146	13.2446
chr1:5692673-5693025	13.0541	0.26	1.0525	0.249915	0.8	1	11.7784	14.3483
chr1:5694856-5695426	15.4275	1.05	1.00393	1.04741	0.29	1	9.96636	20.9705
chr1:5703987-5704457	69.1956	-0.24	0.459893	-0.514328	0.61	1	74.2947	64.0153
chr1:5710265-5710718	25.5604	0.85	0.782019	1.08437	0.28	1	18.1207	33.1114
chr1:5720301-5720668	19.079	1.15	0.920021	1.24732	0.21	1	11.7784	26.4891
chr1:5725116-5725662	34.0501	-0.29	0.657357	-0.436843	0.66	1	37.1473	30.904
chr1:5731514-5731806	8.12455	0.63	1.40293	0.445928	0.66	1	6.34223	9.93341
chr1:5742532-5742719	5.75109	-1.32	1.79105	-0.738068	0.46	1	8.1543	3.31114
chr1:5750516-5750824	14.2408	-1.74	1.14227	-1.52063	0.13	1	21.7448	6.62228
chr1:5755845-5756211	24.7388	-0.2	0.761612	-0.266051	0.79	1	26.275	23.178
chr1:5762592-5762834	10.5893	0.4	1.20034	0.333688	0.74	1	9.06033	12.1408
chr1:5763277-5763568	14.4234	1.11	1.04473	1.06347	0.29	1	9.06033	19.8668
chr1:5770823-5771414	22.4566	0.07	0.795576	0.0884777	0.93	1	21.7448	23.178
chr1:5773386-5773774	15.3362	-1.32	1.04636	-1.26336	0.21	1	21.7448	8.8297
chr1:5781173-5781681	30.3073	-0.07	0.6895	-0.100855	0.92	1	30.8051	29.8002
chr1:5786384-5786652	6.66396	-1.61	1.6782	-0.960208	0.34	1	9.96636	3.31114
chr1:5795283-5795759	44.9132	-0.28	0.57263	-0.493161	0.62	1	48.9258	40.8374
chr1:5796178-5796923	149.62	-0.05	0.320697	-0.170193	0.86	1	151.307	147.898
chr1:5801710-5802025	30.1247	-0.26	0.695781	-0.37804	0.71	1	32.6172	27.5928
chr1:5808347-5808985	26.5645	0.21	0.734873	0.283842	0.78	1	24.4629	28.6965
chr1:5816577-5817101	28.299	-0.66	0.738036	-0.898281	0.37	1	34.4292	22.0743
chr1:5826162-5826633	32.9546	0.09	0.662197	0.132814	0.89	1	31.7111	34.2151
chr1:5837959-5838205	7.30297	-0.74	1.49886	-0.49168	0.62	1	9.06033	5.51856
chr1:5841603-5841776	6.3901	-0.42	1.59686	-0.259905	0.79	1	7.24826	5.51856
chr1:5849367-5849580	8.39841	-0.25	1.369	-0.183736	0.85	1	9.06033	7.72599
chr1:5854070-5854282	5.84237	2.43	1.93576	1.25684	0.21	1	1.81207	9.93341
chr1:5855673-5856202	35.9671	-0.8	0.673082	-1.18241	0.24	1	45.3016	26.4891
chr1:5863547-5864048	19.718	-0.32	0.85341	-0.377223	0.71	1	21.7448	17.6594
chr1:5867659-5867857	6.66396	0.94	1.58124	0.595172	0.55	1	4.53016	8.8297
chr1:5877036-5877526	24.5562	0.87	0.798284	1.09371	0.27	1	17.2146	32.0077
chr1:5886672-5887589	24.1911	-0.96	0.817857	-1.17301	0.24	1	31.7111	16.5557
chr1:5898809-5899058	10.5893	0.4	1.20034	0.333688	0.74	1	9.06033	12.1408
chr1:5907259-5907629	11.4109	1.36	1.21925	1.11755	0.26	1	6.34223	16.5557
chr1:5909622-5910085	22.5479	-0.51	0.809486	-0.626919	0.53	1	26.275	18.7631
chr1:5912479-5912744	12.415	1.26	1.15083	1.0975	0.27	1	7.24826	17.6594
chr1:5913311-5913701	15.6101	0.36	0.954289	0.373205	0.71	1	13.5905	17.6594
chr1:5913882-5914284	17.4358	0.02	0.898108	0.0168226	0.99	1	17.2146	17.6594
chr1:5921962-5922581	36.9713	-0.32	0.632669	-0.508839	0.61	1	40.7715	33.1114
chr1:5927159-5927524	18.5313	-0.68	0.898225	-0.757472	0.45	1	22.6508	14.3483
chr1:5929538-5929741	13.1453	0.49	1.0551	0.460078	0.65	1	10.8724	15.452
chr1:5940247-5940448	12.2325	0.75	1.1158	0.670787	0.5	1	9.06033	15.452
chr1:5941270-5941468	10.3154	-0.44	1.2258	-0.356831	0.72	1	11.7784	8.8297
chr1:5948261-5948838	25.8342	0.55	0.757317	0.72206	0.47	1	20.8388	30.904
chr1:5955081-5955578	26.2907	-0.12	0.73805	-0.162987	0.87	1	27.181	25.3854
chr1:5968531-5968924	13.8756	-1.39	1.10923	-1.25225	0.21	1	19.9327	7.72599
chr1:5969244-5969533	17.5271	0.18	0.896739	0.201367	0.84	1	16.3086	18.7631
chr1:6006343-6006580	9.22	-0.85	1.33663	-0.637752	0.52	1	11.7784	6.62228
chr1:6010541-6011210	18.44	0.03	0.874108	0.0326855	0.97	1	18.1207	18.7631
chr1:6030616-6030986	9.76772	-0.63	1.27734	-0.493251	0.62	1	11.7784	7.72599
chr1:6050235-6050505	6.84653	2	1.69066	1.18297	0.24	1	2.7181	11.0371
chr1:6058487-6058969	8.85485	-0.39	1.33613	-0.291168	0.77	1	9.96636	7.72599
chr1:6063193-6063644	11.5935	2.03	1.30021	1.56018	0.12	1	4.53016	18.7631
chr1:6074538-6074711	7.85069	-0.47	1.42695	-0.332125	0.74	1	9.06033	6.62228
chr1:6081275-6081506	9.31128	1.26	1.35695	0.930792	0.35	1	5.4362	13.2446
chr1:6090192-6090387	6.3901	-0.42	1.59686	-0.259905	0.79	1	7.24826	5.51856
chr1:6103364-6103600	9.76772	1.04	1.29975	0.80065	0.42	1	6.34223	13.2446
chr1:6117214-6117829	11.6847	-0.74	1.15394	-0.638646	0.52	1	14.4965	8.8297
chr1:6133520-6133732	6.3901	2.58	1.87107	1.38154	0.17	1	1.81207	11.0371
chr1:6155600-6155807	7.66812	0.85	1.45925	0.581119	0.56	1	5.4362	9.93341
chr1:6171762-6171935	5.38594	-0.54	1.79364	-0.30347	0.76	1	6.34223	4.41485
chr1:6180042-6180334	7.39425	-0.32	1.46559	-0.219655	0.83	1	8.1543	6.62228
chr1:6202716-6203094	10.2242	0.85	1.25006	0.678368	0.5	1	7.24826	13.2446
chr1:6248071-6248398	8.67227	4.17	3.31535	1.25775	0.21	1	0.906033	16.5557
chr1:6256451-6256841	7.30297	-0.74	1.49886	-0.49168	0.62	1	9.06033	5.51856
chr1:6265539-6265861	8.21584	1	1.42087	0.703795	0.48	1	5.4362	11.0371
chr1:6287740-6288013	8.30713	1.4	1.45417	0.963116	0.34	1	4.53016	12.1408
chr1:6290157-6290442	14.5146	0.16	0.988195	0.165454	0.87	1	13.5905	15.452
chr1:6316831-6317115	12.3238	-0.32	1.09453	-0.294123	0.77	1	13.5905	11.0371
chr1:6352556-6352833	6.29881	-0.91	1.6459	-0.550997	0.58	1	8.1543	4.41485
chr1:6365955-6366159	5.29465	2.26	2.01837	1.12121	0.26	1	1.81207	8.8297
chr1:6380223-6380580	11.5935	-1.02	1.18382	-0.859143	0.39	1	15.4026	7.72599
chr1:6381374-6381545	5.6598	1.07	1.76332	0.607031	0.54	1	3.62413	7.72599
chr1:6401151-6401649	39.8925	-0.35	0.610534	-0.576011	0.56	1	44.3956	35.3188
chr1:6402838-6403157	17.5271	-0.74	0.926159	-0.79572	0.43	1	21.7448	13.2446
chr1:6403330-6403589	27.5687	-0.36	0.729101	-0.50061	0.62	1	30.8051	24.2817
chr1:6404665-6404996	25.104	-0.37	0.762017	-0.484546	0.63	1	28.087	22.0743
chr1:6408143-6408326	11.4109	-0.12	1.1421	-0.101108	0.92	1	11.7784	11.0371
chr1:6413571-6413774	5.29465	-1.15	1.86855	-0.616517	0.54	1	7.24826	3.31114
chr1:6418647-6418826	4.65564	-2.91	2.41067	-1.20583	0.23	1	8.1543	1.10371
chr1:6423497-6423668	6.29881	1.85	1.74517	1.05892	0.29	1	2.7181	9.93341
chr1:6462261-6462432	5.20336	1.49	1.91129	0.777186	0.44	1	2.7181	7.72599
chr1:6475588-6475811	7.21168	1.11	1.52886	0.726707	0.47	1	4.53016	9.93341
chr1:6483214-6483459	5.47723	0	1.75508	2.10477e-06	1	1	5.4362	5.51856
chr1:6497899-6498077	7.85069	-0.47	1.42695	-0.332125	0.74	1	9.06033	6.62228
chr1:6499134-6499518	6.93782	-0.15	1.51243	-0.1005	0.92	1	7.24826	6.62228
chr1:6500322-6500710	12.6889	0.61	1.08353	0.563859	0.57	1	9.96636	15.452
chr1:6501243-6501768	11.3196	-0.37	1.15529	-0.324068	0.75	1	12.6845	9.93341
chr1:6504763-6505057	6.3901	2.58	1.87107	1.38154	0.17	1	1.81207	11.0371
chr1:6514173-6514346	6.29881	-0.91	1.6459	-0.550997	0.58	1	8.1543	4.41485
chr1:6515036-6515227	9.22	-0.85	1.33663	-0.637752	0.52	1	11.7784	6.62228
chr1:6540338-6540658	23.5521	-1.21	0.854247	-1.41229	0.16	1	32.6172	14.3483
chr1:6543780-6544188	21.5438	-0.54	0.829269	-0.656384	0.51	1	25.3689	17.6594
chr1:6557619-6558056	15.6101	0.36	0.954289	0.373205	0.71	1	13.5905	17.6594
chr1:6560456-6560870	21.9089	0	0.805189	1.74498e-06	1	1	21.7448	22.0743
chr1:6566582-6567070	33.6849	-0.16	0.657142	-0.250153	0.8	1	35.3353	32.0077
chr1:6570693-6571184	29.2119	-0.18	0.70352	-0.256668	0.8	1	30.8051	27.5928
chr1:6574487-6574665	5.38594	3.43	2.30661	1.48831	0.14	1	0.906033	9.93341
chr1:6585845-6586018	4.74693	-1.74	2.09998	-0.827128	0.41	1	7.24826	2.20743
chr1:6587305-6587590	10.6806	0.68	1.20674	0.561906	0.57	1	8.1543	13.2446
chr1:6588896-6589069	7.39425	-0.32	1.46559	-0.219655	0.83	1	8.1543	6.62228
chr1:6590912-6591083	6.66396	0.94	1.58124	0.595172	0.55	1	4.53016	8.8297
chr1:6623202-6623711	15.7927	-0.28	0.949254	-0.299658	0.76	1	17.2146	14.3483
chr1:6626979-6627313	14.6059	0.36	0.988966	0.366617	0.71	1	12.6845	16.5557
chr1:6640368-6640612	7.7594	-0.87	1.46352	-0.597506	0.55	1	9.96636	5.51856
chr1:6649801-6650019	5.29465	2.26	2.01837	1.12121	0.26	1	1.81207	8.8297
chr1:6650809-6650980	8.12455	0.63	1.40293	0.445928	0.66	1	6.34223	9.93341
chr1:6666067-6666432	12.6889	-0.65	1.09254	-0.599061	0.55	1	15.4026	9.93341
chr1:6681217-6681392	6.75524	-1.06	1.59368	-0.664429	0.51	1	9.06033	4.41485
chr1:6710892-6711232	9.67643	0.72	1.28253	0.563316	0.57	1	7.24826	12.1408
chr1:6729610-6730029	6.93782	-0.15	1.51243	-0.1005	0.92	1	7.24826	6.62228
chr1:6759266-6759437	5.6598	1.07	1.76332	0.607031	0.54	1	3.62413	7.72599
chr1:6787136-6787807	44.0917	0.2	0.574051	0.343954	0.73	1	40.7715	47.4596
chr1:6803386-6803737	17.4358	0.02	0.898108	0.0168226	0.99	1	17.2146	17.6594
chr1:6814046-6814275	8.67227	0.78	1.36535	0.56953	0.57	1	6.34223	11.0371
chr1:6814559-6814741	5.75109	1.68	1.81823	0.922916	0.36	1	2.7181	8.8297
chr1:6823980-6824168	6.3901	2.58	1.87107	1.38154	0.17	1	1.81207	11.0371
chr1:6828828-6829785	40.714	-0.09	0.596481	-0.151894	0.88	1	41.6775	39.7337
chr1:6833896-6834484	34.0501	0.18	0.652925	0.272844	0.78	1	31.7111	36.4225
chr1:6834813-6835004	6.75524	1.43	1.61973	0.884691	0.38	1	3.62413	9.93341
chr1:6858875-6859293	55.959	-0.76	0.546402	-1.38327	0.17	1	69.7645	41.9411
chr1:6862717-6863011	25.0127	-1.18	0.829073	-1.4203	0.16	1	34.4292	15.452
chr1:6865384-6865751	30.1247	-0.26	0.695781	-0.37804	0.71	1	32.6172	27.5928
chr1:6873311-6873776	51.5772	0.18	0.529894	0.337749	0.74	1	48.0197	55.1856
chr1:6873831-6874044	6.66396	-1.61	1.6782	-0.960208	0.34	1	9.96636	3.31114
chr1:6887202-6887428	7.66812	-1.32	1.52075	-0.869254	0.38	1	10.8724	4.41485
chr1:6900168-6900381	9.76772	-0.63	1.27734	-0.493251	0.62	1	11.7784	7.72599
chr1:6901205-6901576	7.66812	0.85	1.45925	0.581119	0.56	1	5.4362	9.93341
chr1:6911888-6912183	6.75524	-1.06	1.59368	-0.664429	0.51	1	9.06033	4.41485
chr1:6920396-6920569	5.29465	-1.15	1.86855	-0.616517	0.54	1	7.24826	3.31114
chr1:6922198-6922537	8.76356	-0.74	1.36407	-0.540266	0.59	1	10.8724	6.62228
chr1:6929915-6930305	14.9711	1.19	1.03245	1.15166	0.25	1	9.06033	20.9705
chr1:6937706-6938104	19.1703	-0.42	0.868685	-0.477775	0.63	1	21.7448	16.5557
chr1:6940575-6941282	22.0002	0.13	0.803975	0.163924	0.87	1	20.8388	23.178
chr1:6946293-6946557	14.3321	-1.45	1.09892	-1.32236	0.19	1	20.8388	7.72599
chr1:6956929-6957207	12.6889	0.61	1.08353	0.563859	0.57	1	9.96636	15.452
chr1:6961435-6961829	23.9172	0.02	0.771174	0.0285637	0.98	1	23.5569	24.2817
chr1:6970537-6970805	16.3404	-0.18	0.929966	-0.190906	0.85	1	17.2146	15.452
chr1:6976093-6976782	81.9758	-0.26	0.424602	-0.622258	0.53	1	88.7912	75.0525
chr1:6989401-6990119	78.1418	-0.01	0.428488	-0.0314657	0.97	1	77.9188	78.3636
chr1:6991335-6991553	21.1786	0.4	0.825232	0.485365	0.63	1	18.1207	24.2817
chr1:6992265-6992436	16.3404	0.81	0.95637	0.847499	0.4	1	11.7784	20.9705
chr1:6995703-6996264	57.237	-0.01	0.500968	-0.0275568	0.98	1	57.0801	57.3931
chr1:6996560-6996733	13.9669	0.06	1.00934	0.056062	0.96	1	13.5905	14.3483
chr1:6998814-6998987	10.498	1.85	1.34358	1.37542	0.17	1	4.53016	16.5557
chr1:7000936-7001249	16.6143	-0.61	0.94111	-0.649692	0.52	1	19.9327	13.2446
chr1:7004112-7004412	20.5396	0.19	0.831635	0.231648	0.82	1	19.0267	22.0743
chr1:7005868-7006360	42.1746	-0.11	0.586268	-0.191847	0.85	1	43.4896	40.8374
chr1:7009203-7009836	34.5978	0.22	0.648752	0.340986	0.73	1	31.7111	37.5262
chr1:7027560-7028133	7.39425	-0.32	1.46559	-0.219655	0.83	1	8.1543	6.62228
chr1:7029965-7030299	21.3612	0.68	0.836355	0.810748	0.42	1	16.3086	26.4891
chr1:7034245-7034594	34.0501	0.18	0.652925	0.272844	0.78	1	31.7111	36.4225
chr1:7037405-7038021	60.8885	-0.45	0.500809	-0.896873	0.37	1	69.7645	51.8745
chr1:7042420-7042774	29.3944	0.02	0.698964	0.0256423	0.98	1	28.9931	29.8002
chr1:7045128-7045425	12.3238	-0.32	1.09453	-0.294123	0.77	1	13.5905	11.0371
chr1:7047831-7048136	10.4067	-0.15	1.20964	-0.125658	0.9	1	10.8724	9.93341
chr1:7054476-7054897	25.104	0.92	0.794655	1.16025	0.25	1	17.2146	33.1114
chr1:7059310-7059736	11.8673	-1.74	1.2579	-1.38084	0.17	1	18.1207	5.51856
chr1:7064386-7064812	14.0582	0.26	1.0078	0.261	0.79	1	12.6845	15.452
chr1:7067429-7067616	7.39425	2.14	1.65027	1.29524	0.2	1	2.7181	12.1408
chr1:7071722-7072323	26.0168	0.15	0.741232	0.20507	0.84	1	24.4629	27.5928
chr1:7074656-7074880	4.65564	-2.91	2.41067	-1.20583	0.23	1	8.1543	1.10371
chr1:7079957-7080945	95.1212	0.17	0.391803	0.438708	0.66	1	88.7912	101.542
chr1:7084850-7085318	93.6606	-0.49	0.413587	-1.19469	0.23	1	108.724	78.3636
chr1:7086540-7086799	14.9711	0.07	0.970892	0.0725014	0.94	1	14.4965	15.452
chr1:7093298-7093685	40.714	-0.48	0.61154	-0.790149	0.43	1	47.1137	34.2151
chr1:7095495-7095857	41.9921	-0.64	0.613184	-1.03954	0.3	1	50.7378	33.1114
chr1:7098518-7098732	15.6101	-0.67	0.974723	-0.68722	0.49	1	19.0267	12.1408
chr1:7106132-7106516	18.1661	0.42	0.887779	0.477034	0.63	1	15.4026	20.9705
chr1:7112083-7112263	6.3901	-0.42	1.59686	-0.259905	0.79	1	7.24826	5.51856
chr1:7121940-7122148	9.76772	1.04	1.29975	0.80065	0.42	1	6.34223	13.2446
chr1:7125312-7125559	7.7594	-0.87	1.46352	-0.597506	0.55	1	9.96636	5.51856
chr1:7129143-7129394	13.5105	0.16	1.02961	0.151631	0.88	1	12.6845	14.3483
chr1:7133527-7133915	15.6101	-0.67	0.974723	-0.68722	0.49	1	19.0267	12.1408
chr1:7135388-7135640	12.5976	-0.91	1.11716	-0.811781	0.42	1	16.3086	8.8297
chr1:7136623-7136879	20.8135	-0.15	0.827074	-0.183782	0.85	1	21.7448	19.8668
chr1:7146282-7146567	10.498	0.13	1.20129	0.104498	0.92	1	9.96636	11.0371
chr1:7150837-7151069	13.8756	-0.15	1.01517	-0.14973	0.88	1	14.4965	13.2446
chr1:7151555-7152514	50.7556	-0.33	0.5408	-0.61688	0.54	1	56.174	45.2522
chr1:7158126-7158347	10.4067	-0.15	1.20964	-0.125658	0.9	1	10.8724	9.93341
chr1:7158791-7159219	16.7055	-0.43	0.928447	-0.461891	0.64	1	19.0267	14.3483
chr1:7159779-7160496	36.5148	-0.29	0.635291	-0.455705	0.65	1	39.8654	33.1114
chr1:7163641-7163816	5.29465	-1.15	1.86855	-0.616517	0.54	1	7.24826	3.31114
chr1:7198215-7198776	14.5146	1.34	1.06556	1.25853	0.21	1	8.1543	20.9705
chr1:7209103-7209276	10.0416	0.26	1.23607	0.2128	0.83	1	9.06033	11.0371
chr1:7209565-7210304	76.7724	0.04	0.432241	0.0873186	0.93	1	75.2007	78.3636
chr1:7216041-7216316	8.03326	0.26	1.39812	0.188136	0.85	1	7.24826	8.8297
chr1:7232433-7232704	13.9669	1.26	1.0783	1.17132	0.24	1	8.1543	19.8668
chr1:7232999-7233248	25.104	-0.37	0.762017	-0.484546	0.63	1	28.087	22.0743
chr1:7236202-7236751	66.1831	-0.02	0.465525	-0.0427451	0.97	1	66.1404	66.2228
chr1:7295919-7296092	4.65564	-2.91	2.41067	-1.20583	0.23	1	8.1543	1.10371
chr1:7307121-7307298	8.03326	0.26	1.39812	0.188136	0.85	1	7.24826	8.8297
chr1:7328028-7328303	10.5893	2.26	1.40483	1.61089	0.11	1	3.62413	17.6594
chr1:7333265-7333509	5.29465	-1.15	1.86855	-0.616517	0.54	1	7.24826	3.31114
chr1:7339418-7339775	6.48138	3.72	2.17982	1.70769	0.088	1	0.906033	12.1408
chr1:7346636-7346817	14.4234	-0.04	0.9914	-0.0368408	0.97	1	14.4965	14.3483
chr1:7348673-7348972	20.5396	0.19	0.831635	0.231648	0.82	1	19.0267	22.0743
chr1:7350069-7350250	9.40257	-0.2	1.28616	-0.152698	0.88	1	9.96636	8.8297
chr1:7352901-7353130	7.85069	1.72	1.53732	1.12043	0.26	1	3.62413	12.1408
chr1:7354560-7354883	8.30713	-0.61	1.39375	-0.438696	0.66	1	9.96636	6.62228
chr1:7355592-7355800	7.66812	0.85	1.45925	0.581119	0.56	1	5.4362	9.93341
chr1:7376049-7376282	10.1329	2.68	1.51724	1.76509	0.078	1	2.7181	17.6594
chr1:7390223-7390468	7.21168	-1.2	1.55342	-0.770166	0.44	1	9.96636	4.41485
chr1:7405983-7406325	11.4109	-0.12	1.1421	-0.101108	0.92	1	11.7784	11.0371
chr1:7415758-7416067	23.1869	0.39	0.789737	0.49202	0.62	1	19.9327	26.4891
chr1:7416933-7417669	45.0958	-0.88	0.614989	-1.42927	0.15	1	57.9861	32.0077
chr1:7420716-7420938	15.6101	0.36	0.954289	0.373205	0.71	1	13.5905	17.6594
chr1:7425877-7426076	4.65564	-2.91	2.41067	-1.20583	0.23	1	8.1543	1.10371
chr1:7432278-7432886	14.1495	-0.66	1.02651	-0.645842	0.52	1	17.2146	11.0371
chr1:7439203-7439500	9.76772	-0.63	1.27734	-0.493251	0.62	1	11.7784	7.72599
chr1:7450823-7451111	7.7594	-0.87	1.46352	-0.597506	0.55	1	9.96636	5.51856
chr1:7456084-7457604	187.869	-0.4	0.311883	-1.27572	0.2	1	212.012	163.349
chr1:7472931-7473490	15.0624	-0.81	1.00334	-0.804668	0.42	1	19.0267	11.0371
chr1:7487167-7487404	6.75524	1.43	1.61973	0.884691	0.38	1	3.62413	9.93341
chr1:7508237-7508408	5.6598	1.07	1.76332	0.607031	0.54	1	3.62413	7.72599
chr1:7513622-7513795	4.74693	-1.74	2.09998	-0.827128	0.41	1	7.24826	2.20743
chr1:7518586-7518757	6.20752	1.26	1.68164	0.751074	0.45	1	3.62413	8.8297
chr1:7520925-7521098	6.11624	-2.2	1.87197	-1.1733	0.24	1	9.96636	2.20743
chr1:7523377-7523548	7.02911	0.26	1.50085	0.175259	0.86	1	6.34223	7.72599
chr1:7525748-7526091	16.7968	-0.25	0.919154	-0.273661	0.78	1	18.1207	15.452
chr1:7527814-7528018	11.3196	-0.37	1.15529	-0.324068	0.75	1	12.6845	9.93341
chr1:7534924-7535112	5.84237	-0.74	1.71213	-0.430435	0.67	1	7.24826	4.41485
chr1:7549107-7549528	17.9836	0.1	0.884873	0.115916	0.91	1	17.2146	18.7631
chr1:7566399-7566689	9.85901	-0.32	1.25474	-0.256567	0.8	1	10.8724	8.8297
chr1:7566743-7566933	5.75109	1.68	1.81823	0.922916	0.36	1	2.7181	8.8297
chr1:7620794-7620967	7.85069	1.72	1.53732	1.12043	0.26	1	3.62413	12.1408
chr1:7625669-7626027	11.6847	-0.74	1.15394	-0.638646	0.52	1	14.4965	8.8297
chr1:7628219-7628652	17.6184	-0.56	0.911769	-0.614285	0.54	1	20.8388	14.3483
chr1:7633322-7633495	4.9295	-0.32	1.89625	-0.169768	0.87	1	5.4362	4.41485
chr1:7646751-7647066	12.1412	0.5	1.10752	0.455112	0.65	1	9.96636	14.3483
chr1:7649963-7650136	4.83822	-0.96	1.96616	-0.48793	0.63	1	6.34223	3.31114
chr1:7653625-7653848	9.95029	-0.03	1.24124	-0.0213251	0.98	1	9.96636	9.93341
chr1:7672260-7672531	11.3196	-0.37	1.15529	-0.324068	0.75	1	12.6845	9.93341
chr1:7676366-7676643	8.21584	1	1.42087	0.703795	0.48	1	5.4362	11.0371
chr1:7679414-7679686	5.56851	-3.2	2.253	-1.41872	0.16	1	9.96636	1.10371
chr1:7682251-7682424	4.74693	-1.74	2.09998	-0.827128	0.41	1	7.24826	2.20743
chr1:7704885-7705106	13.2366	0.71	1.0626	0.66864	0.5	1	9.96636	16.5557
chr1:7707327-7707589	7.94198	-0.1	1.40589	-0.0707967	0.94	1	8.1543	7.72599
chr1:7707973-7708247	6.66396	-1.61	1.6782	-0.960208	0.34	1	9.96636	3.31114
chr1:7723678-7724146	12.7802	-0.42	1.07444	-0.386279	0.7	1	14.4965	11.0371
chr1:7729013-7729184	6.11624	0.75	1.65252	0.452923	0.65	1	4.53016	7.72599
chr1:7729940-7730113	7.48554	0.07	1.44884	0.0485852	0.96	1	7.24826	7.72599
chr1:7734557-7734851	11.2283	-0.64	1.17555	-0.547702	0.58	1	13.5905	8.8297
chr1:7744203-7744835	33.5937	0.22	0.658065	0.334263	0.74	1	30.8051	36.4225
chr1:7753130-7753303	5.38594	-0.54	1.79364	-0.30347	0.76	1	6.34223	4.41485
chr1:7766754-7767003	15.0624	-0.81	1.00334	-0.804668	0.42	1	19.0267	11.0371
chr1:7767205-7767536	6.84653	2	1.69066	1.18297	0.24	1	2.7181	11.0371
chr1:7781145-7781467	7.30297	-0.74	1.49886	-0.49168	0.62	1	9.06033	5.51856
chr1:7782932-7783105	5.29465	-1.15	1.86855	-0.616517	0.54	1	7.24826	3.31114
chr1:7786949-7787122	5.93366	-0.22	1.66767	-0.133352	0.89	1	6.34223	5.51856
chr1:7794008-7794274	8.76356	-0.74	1.36407	-0.540266	0.59	1	10.8724	6.62228
chr1:7797207-7797435	9.95029	-0.03	1.24124	-0.0213251	0.98	1	9.96636	9.93341
chr1:7797556-7797928	12.0499	0.26	1.10496	0.23805	0.81	1	10.8724	13.2446
chr1:7809291-7809489	6.84653	-0.58	1.54196	-0.37936	0.7	1	8.1543	5.51856
chr1:7818894-7819344	9.22	-0.85	1.33663	-0.637752	0.52	1	11.7784	6.62228
chr1:7824344-7825680	224.84	-0.1	0.276045	-0.369368	0.71	1	231.038	218.535
chr1:7826078-7826251	18.2574	0.58	0.893168	0.654931	0.51	1	14.4965	22.0743
chr1:7837034-7838123	77.2289	0.02	0.430932	0.0474894	0.96	1	76.1068	78.3636
chr1:7840040-7840213	10.5893	0.4	1.20034	0.333688	0.74	1	9.06033	12.1408
chr1:7841070-7841241	7.7594	1.26	1.48812	0.848744	0.4	1	4.53016	11.0371
chr1:7843854-7844036	6.66396	0.94	1.58124	0.595172	0.55	1	4.53016	8.8297
chr1:7844421-7844592	5.6598	1.07	1.76332	0.607031	0.54	1	3.62413	7.72599
chr1:7845788-7846074	7.48554	0.07	1.44884	0.0485852	0.96	1	7.24826	7.72599
chr1:7849877-7850497	37.7929	-0.46	0.632903	-0.733044	0.46	1	43.4896	32.0077
chr1:7855170-7855502	13.0541	-0.98	1.10148	-0.894151	0.37	1	17.2146	8.8297
chr1:7868906-7869407	56.1416	-0.07	0.506382	-0.139003	0.89	1	57.0801	55.1856
chr1:7881938-7882766	36.241	-1.01	0.691715	-1.45356	0.15	1	48.0197	24.2817
chr1:7886985-7887255	9.49386	2.07	1.45349	1.42443	0.15	1	3.62413	15.452
chr1:7888722-7889234	67.5524	0.63	0.488608	1.2973	0.19	1	52.5499	82.7785
chr1:7901916-7902228	12.9628	0.04	1.05477	0.0385336	0.97	1	12.6845	13.2446
chr1:7908496-7908962	36.9713	0.11	0.625825	0.17084	0.86	1	35.3353	38.6299
chr1:7910471-7910781	11.5022	1.68	1.25363	1.33857	0.18	1	5.4362	17.6594
chr1:7917768-7918345	28.2077	-0.77	0.747908	-1.03547	0.3	1	35.3353	20.9705
chr1:7924141-7924363	8.03326	0.26	1.39812	0.188136	0.85	1	7.24826	8.8297
chr1:7927136-7927309	5.6598	-2.06	1.93184	-1.06576	0.29	1	9.06033	2.20743
chr1:7928919-7929111	8.76356	-0.74	1.36407	-0.540266	0.59	1	10.8724	6.62228
chr1:7959194-7959387	11.5935	0.39	1.13488	0.342386	0.73	1	9.96636	13.2446
chr1:7962740-7962922	16.7055	-0.43	0.928447	-0.461891	0.64	1	19.0267	14.3483
chr1:7967442-7968076	111.553	0	0.362346	0.0130341	0.99	1	110.536	112.579
chr1:7968426-7968742	72.0255	0.14	0.447397	0.319047	0.75	1	67.9525	76.1562
chr1:7969573-7969788	27.2036	-0.21	0.728276	-0.293024	0.77	1	28.9931	25.3854
chr1:7970687-7971007	33.3198	-0.52	0.675853	-0.768471	0.44	1	38.9594	27.5928
chr1:7971641-7971864	29.4857	-0.42	0.709465	-0.59602	0.55	1	33.5232	25.3854
chr1:7976965-7977425	27.3861	0	0.722709	1.67977e-06	1	1	27.181	27.5928
chr1:7978073-7979231	64.6313	-0.05	0.471334	-0.103767	0.92	1	65.2344	64.0153
chr1:7987043-7987701	27.7513	-0.15	0.720027	-0.211106	0.83	1	28.9931	26.4891
chr1:7987776-7988475	27.7513	-0.15	0.720027	-0.211106	0.83	1	28.9931	26.4891
chr1:8009430-8010421	238.624	-0.12	0.27095	-0.432069	0.67	1	246.441	230.676
chr1:8011253-8011556	26.6558	-0.28	0.737243	-0.376446	0.71	1	28.9931	24.2817
chr1:8020363-8021094	73.3948	-0.13	0.443536	-0.291481	0.77	1	76.1068	70.6376
chr1:8027293-8027911	17.0707	-0.68	0.933143	-0.723965	0.47	1	20.8388	13.2446
chr1:8046261-8046651	11.6847	0.64	1.14053	0.562498	0.57	1	9.06033	14.3483
chr1:8064067-8065497	91.7435	-0.3	0.404526	-0.747943	0.45	1	100.57	82.7785
chr1:8081806-8082312	42.1746	-0.11	0.586268	-0.191847	0.85	1	43.4896	40.8374
chr1:8108938-8109109	6.29881	1.85	1.74517	1.05892	0.29	1	2.7181	9.93341
chr1:8109170-8109369	5.20336	-1.91	2.00638	-0.950408	0.34	1	8.1543	2.20743
chr1:8116699-8116870	7.21168	1.11	1.52886	0.726707	0.47	1	4.53016	9.93341
chr1:8125415-8125646	6.75524	-1.06	1.59368	-0.664429	0.51	1	9.06033	4.41485
chr1:8126596-8127154	12.7802	-0.42	1.07444	-0.386279	0.7	1	14.4965	11.0371
chr1:8143055-8143316	6.29881	1.85	1.74517	1.05892	0.29	1	2.7181	9.93341
chr1:8146866-8147234	8.03326	0.26	1.39812	0.188136	0.85	1	7.24826	8.8297
chr1:8159642-8159827	5.75109	1.68	1.81823	0.922916	0.36	1	2.7181	8.8297
chr1:8167634-8168039	8.21584	1	1.42087	0.703795	0.48	1	5.4362	11.0371
chr1:8177594-8178162	22.1828	0.39	0.807045	0.488548	0.63	1	19.0267	25.3854
chr1:8232212-8232625	25.5604	0.21	0.748385	0.275863	0.78	1	23.5569	27.5928
chr1:8249806-8250007	6.66396	0.94	1.58124	0.595172	0.55	1	4.53016	8.8297
chr1:8269132-8269305	4.83822	-0.96	1.96616	-0.48793	0.63	1	6.34223	3.31114
chr1:8293517-8294078	104.341	-0.07	0.373876	-0.182336	0.86	1	106.006	102.645
chr1:8298977-8299245	7.7594	1.26	1.48812	0.848744	0.4	1	4.53016	11.0371
chr1:8307637-8307828	11.2283	-0.64	1.17555	-0.547702	0.58	1	13.5905	8.8297
chr1:8311194-8311532	10.9545	0	1.17009	1.96929e-06	1	1	10.8724	11.0371
chr1:8320433-8321476	111.827	-0.06	0.362382	-0.162517	0.87	1	113.254	110.371
chr1:8336862-8337341	18.9877	0.11	0.862224	0.128775	0.9	1	18.1207	19.8668
chr1:8348722-8349054	17.162	-0.5	0.919661	-0.539281	0.59	1	19.9327	14.3483
chr1:8358595-8358830	8.76356	-0.74	1.36407	-0.540266	0.59	1	10.8724	6.62228
chr1:8360472-8360799	8.58099	-1.54	1.46747	-1.05236	0.29	1	12.6845	4.41485
chr1:8366089-8366260	7.02911	0.26	1.50085	0.175259	0.86	1	6.34223	7.72599
chr1:8376764-8376984	7.85069	-0.47	1.42695	-0.332125	0.74	1	9.06033	6.62228
chr1:8386628-8386839	5.29465	-1.15	1.86855	-0.616517	0.54	1	7.24826	3.31114
chr1:8398309-8398505	9.31128	1.26	1.35695	0.930792	0.35	1	5.4362	13.2446
chr1:8404041-8404566	15.884	-0.1	0.942054	-0.105656	0.92	1	16.3086	15.452
chr1:8407041-8407436	15.884	0.93	0.978534	0.946314	0.34	1	10.8724	20.9705
chr1:8412017-8412318	46.9216	0.08	0.554447	0.141782	0.89	1	45.3016	48.5634
chr1:8421432-8421682	11.0457	-1.24	1.24192	-0.998023	0.32	1	15.4026	6.62228
chr1:8430823-8431287	29.2119	-0.18	0.70352	-0.256668	0.8	1	30.8051	27.5928
chr1:8432367-8432589	16.6143	-0.61	0.94111	-0.649692	0.52	1	19.9327	13.2446
chr1:8438995-8439408	43.4527	-0.64	0.603605	-1.06154	0.29	1	52.5499	34.2151
chr1:8449841-8450276	34.5065	-0.32	0.654484	-0.491879	0.62	1	38.0534	30.904
chr1:8460682-8461470	42.5398	0.16	0.583799	0.276047	0.78	1	39.8654	45.2522
chr1:8468865-8469577	64.3574	0.06	0.472193	0.130034	0.9	1	62.5163	66.2228
chr1:8477188-8477448	8.94614	-2.15	1.53776	-1.39944	0.16	1	14.4965	3.31114
chr1:8493135-8493727	34.5978	-0.24	0.650573	-0.36358	0.72	1	37.1473	32.0077
chr1:8498091-8498381	15.884	-0.1	0.942054	-0.105656	0.92	1	16.3086	15.452
chr1:8499556-8499963	11.9586	0.02	1.10808	0.0198798	0.98	1	11.7784	12.1408
chr1:8511289-8512094	104.524	-0.16	0.37574	-0.436406	0.66	1	109.63	99.3341
chr1:8513748-8514209	26.4733	-0.5	0.749939	-0.670053	0.5	1	30.8051	22.0743
chr1:8514850-8515036	13.7844	-0.36	1.02549	-0.355921	0.72	1	15.4026	12.1408
chr1:8547344-8547517	5.29465	-1.15	1.86855	-0.616517	0.54	1	7.24826	3.31114
chr1:8550469-8550732	20.2657	-0.23	0.839606	-0.279254	0.78	1	21.7448	18.7631
chr1:8577738-8578155	9.95029	-0.03	1.24124	-0.0213251	0.98	1	9.96636	9.93341
chr1:8590322-8590559	6.11624	-2.2	1.87197	-1.1733	0.24	1	9.96636	2.20743
chr1:8595819-8596020	7.48554	2.85	1.78771	1.59309	0.11	1	1.81207	13.2446
chr1:8598368-8599096	51.6685	0.87	0.574678	1.5171	0.13	1	36.2413	67.3265
chr1:8599845-8600183	30.6725	0.31	0.689616	0.45002	0.65	1	27.181	34.2151
chr1:8602362-8602533	12.3238	1	1.13024	0.884765	0.38	1	8.1543	16.5557
chr1:8603993-8604327	19.5354	0.19	0.851547	0.22199	0.82	1	18.1207	20.9705
chr1:8605436-8606175	48.9299	-0.24	0.546899	-0.434073	0.66	1	52.5499	45.2522
chr1:8610303-8610682	38.797	-0.03	0.610596	-0.0555954	0.96	1	38.9594	38.6299
chr1:8611645-8611907	28.938	-0.49	0.719054	-0.677259	0.5	1	33.5232	24.2817
chr1:8643350-8643527	7.7594	1.26	1.48812	0.848744	0.4	1	4.53016	11.0371
chr1:8651984-8652180	5.6598	1.07	1.76332	0.607031	0.54	1	3.62413	7.72599
chr1:8656329-8656502	6.93782	-0.15	1.51243	-0.1005	0.92	1	7.24826	6.62228
chr1:8667884-8668067	4.74693	-1.74	2.09998	-0.827128	0.41	1	7.24826	2.20743
chr1:8697508-8697871	13.9669	0.06	1.00934	0.056062	0.96	1	13.5905	14.3483
chr1:8701092-8701693	58.6976	0.24	0.49803	0.478632	0.63	1	53.4559	64.0153
chr1:8707919-8708321	8.30713	-0.61	1.39375	-0.438696	0.66	1	9.96636	6.62228
chr1:8711081-8711482	16.523	0.18	0.923147	0.19019	0.85	1	15.4026	17.6594
chr1:8713158-8713628	25.8342	-0.7	0.771479	-0.902581	0.37	1	31.7111	19.8668
chr1:8718375-8718651	7.30297	-0.74	1.49886	-0.49168	0.62	1	9.06033	5.51856
chr1:8723222-8723644	17.7097	0.51	0.902324	0.566275	0.57	1	14.4965	20.9705
chr1:8731978-8732226	7.30297	-0.74	1.49886	-0.49168	0.62	1	9.06033	5.51856
chr1:8748738-8748909	5.84237	2.43	1.93576	1.25684	0.21	1	1.81207	9.93341
chr1:8749193-8749391	6.84653	-0.58	1.54196	-0.37936	0.7	1	8.1543	5.51856
chr1:8754458-8754795	9.03742	0.26	1.3137	0.200226	0.84	1	8.1543	9.93341
chr1:8763282-8763478	6.75524	1.43	1.61973	0.884691	0.38	1	3.62413	9.93341
chr1:8769620-8770292	20.996	-0.64	0.845238	-0.75414	0.45	1	25.3689	16.5557
chr1:8773563-8774073	18.8051	0.66	0.885036	0.740481	0.46	1	14.4965	23.178
chr1:8776210-8776394	6.75524	-1.06	1.59368	-0.664429	0.51	1	9.06033	4.41485
chr1:8789816-8790293	10.0416	-1.42	1.33406	-1.0607	0.29	1	14.4965	5.51856
chr1:8792750-8793005	7.94198	-0.1	1.40589	-0.0707967	0.94	1	8.1543	7.72599
chr1:8801575-8802166	64.2661	-0.23	0.476788	-0.482405	0.63	1	68.8585	59.6005
chr1:8805268-8805439	7.12039	0.68	1.50597	0.450256	0.65	1	5.4362	8.8297
chr1:8836263-8836434	6.20752	1.26	1.68164	0.751074	0.45	1	3.62413	8.8297
chr1:8842799-8843403	44.822	-0.35	0.576041	-0.604816	0.55	1	49.8318	39.7337
chr1:8849134-8849378	5.75109	-1.32	1.79105	-0.738068	0.46	1	8.1543	3.31114
chr1:8859952-8860313	6.29881	1.85	1.74517	1.05892	0.29	1	2.7181	9.93341
chr1:8867287-8867586	9.95029	-0.03	1.24124	-0.0213251	0.98	1	9.96636	9.93341
chr1:8870366-8870641	9.12871	3.17	1.71056	1.85315	0.064	1	1.81207	16.5557
chr1:8873487-8873756	13.5105	1.43	1.11724	1.28259	0.2	1	7.24826	19.8668
chr1:8874314-8874492	7.94198	-0.1	1.40589	-0.0707967	0.94	1	8.1543	7.72599
chr1:8883237-8884105	69.013	0.6	0.481375	1.25489	0.21	1	54.362	83.8822
chr1:8891353-8891953	8.67227	-1.12	1.40628	-0.793209	0.43	1	11.7784	5.51856
chr1:8898163-8898484	7.85069	1.72	1.53732	1.12043	0.26	1	3.62413	12.1408
chr1:8899146-8899320	6.20752	-1.47	1.72824	-0.852846	0.39	1	9.06033	3.31114
chr1:8913931-8914242	7.21168	-1.2	1.55342	-0.770166	0.44	1	9.96636	4.41485
chr1:8915928-8916648	17.5271	0.18	0.896739	0.201367	0.84	1	16.3086	18.7631
chr1:8936624-8937184	17.5271	-0.74	0.926159	-0.79572	0.43	1	21.7448	13.2446
chr1:8938615-8938808	7.94198	-0.1	1.40589	-0.0707967	0.94	1	8.1543	7.72599
chr1:8959910-8960307	13.4192	1.18	1.09332	1.07981	0.28	1	8.1543	18.7631
chr1:8967711-8968294	37.9754	-0.31	0.62368	-0.491166	0.62	1	41.6775	34.2151
chr1:8968489-8968870	17.3445	-0.15	0.902314	-0.168457	0.87	1	18.1207	16.5557
chr1:8993781-8994003	7.94198	-0.1	1.40589	-0.0707967	0.94	1	8.1543	7.72599
chr1:9012670-9012878	8.94614	-0.06	1.31977	-0.0446222	0.96	1	9.06033	8.8297
chr1:9020708-9021080	11.0457	-1.24	1.24192	-0.998023	0.32	1	15.4026	6.62228
chr1:9026472-9026645	5.38594	-0.54	1.79364	-0.30347	0.76	1	6.34223	4.41485
chr1:9052775-9053310	13.5105	1.43	1.11724	1.28259	0.2	1	7.24826	19.8668
chr1:9056399-9056572	4.65564	-2.91	2.41067	-1.20583	0.23	1	8.1543	1.10371
chr1:9057031-9057239	9.22	-0.85	1.33663	-0.637752	0.52	1	11.7784	6.62228
chr1:9076250-9076845	33.4111	-0.43	0.669692	-0.640357	0.52	1	38.0534	28.6965
chr1:9091009-9091182	6.3901	-0.42	1.59686	-0.259905	0.79	1	7.24826	5.51856
chr1:9107217-9107390	6.02495	0.26	1.6486	0.159552	0.87	1	5.4362	6.62228
chr1:9115839-9116278	14.6972	-0.53	0.99687	-0.527109	0.6	1	17.2146	12.1408
chr1:9122080-9122298	6.29881	1.85	1.74517	1.05892	0.29	1	2.7181	9.93341
chr1:9123933-9124298	7.39425	2.14	1.65027	1.29524	0.2	1	2.7181	12.1408
chr1:9129545-9129721	4.74693	-1.74	2.09998	-0.827128	0.41	1	7.24826	2.20743
chr1:9130647-9130824	6.11624	0.75	1.65252	0.452923	0.65	1	4.53016	7.72599
chr1:9140571-9140957	7.39425	2.14	1.65027	1.29524	0.2	1	2.7181	12.1408
chr1:9162417-9162835	17.0707	-0.68	0.933143	-0.723965	0.47	1	20.8388	13.2446
chr1:9174151-9174579	64.8138	0.04	0.470406	0.086399	0.93	1	63.4223	66.2228
chr1:9176123-9176704	44.2742	-0.39	0.581575	-0.668945	0.5	1	49.8318	38.6299
chr1:9179906-9180107	5.93366	3.58	2.23532	1.60377	0.11	1	0.906033	11.0371
chr1:9189414-9189587	7.30297	1.58	1.57349	1.00729	0.31	1	3.62413	11.0371
chr1:9200778-9201376	28.8467	0.52	0.718458	0.719307	0.47	1	23.5569	34.2151
chr1:9202668-9202937	18.8964	-0.04	0.864307	-0.048384	0.96	1	19.0267	18.7631
chr1:9214340-9214646	9.85901	-0.32	1.25474	-0.256567	0.8	1	10.8724	8.8297
chr1:9220706-9220879	6.3901	-0.42	1.59686	-0.259905	0.79	1	7.24826	5.51856
chr1:9224069-9224262	9.31128	-0.51	1.30589	-0.394037	0.69	1	10.8724	7.72599
chr1:9226189-9226369	5.84237	2.43	1.93576	1.25684	0.21	1	1.81207	9.93341
chr1:9228479-9228663	4.83822	-0.96	1.96616	-0.48793	0.63	1	6.34223	3.31114
chr1:9256265-9256488	18.8051	0.66	0.885036	0.740481	0.46	1	14.4965	23.178
chr1:9256679-9257330	115.843	-0.05	0.356698	-0.133874	0.89	1	116.878	114.786
chr1:9259398-9259597	14.4234	-1.2	1.06407	-1.12435	0.26	1	19.9327	8.8297
chr1:9262468-9262736	19.8093	0.64	0.862923	0.735876	0.46	1	15.4026	24.2817
chr1:9278994-9279167	5.84237	-0.74	1.71213	-0.430435	0.67	1	7.24826	4.41485
chr1:9316271-9316456	10.3154	-0.44	1.2258	-0.356831	0.72	1	11.7784	8.8297
chr1:9317128-9317299	9.67643	0.72	1.28253	0.563316	0.57	1	7.24826	12.1408
chr1:9319106-9319723	124.242	0.19	0.349143	0.553393	0.58	1	115.066	133.549
chr1:9334282-9334548	17.5271	-0.74	0.926159	-0.79572	0.43	1	21.7448	13.2446
chr1:9334948-9335152	5.29465	-1.15	1.86855	-0.616517	0.54	1	7.24826	3.31114
chr1:9346338-9346787	10.8632	1.26	1.24344	1.01576	0.31	1	6.34223	15.452
chr1:9364072-9364578	31.9505	0.08	0.672059	0.122702	0.9	1	30.8051	33.1114
chr1:9365349-9365520	6.11624	0.75	1.65252	0.452923	0.65	1	4.53016	7.72599
chr1:9369022-9369195	5.38594	-0.54	1.79364	-0.30347	0.76	1	6.34223	4.41485
chr1:9393963-9394220	11.2283	-0.64	1.17555	-0.547702	0.58	1	13.5905	8.8297
chr1:9395760-9396016	10.2242	0.85	1.25006	0.678368	0.5	1	7.24826	13.2446
chr1:9398409-9398594	5.11208	0.85	1.86879	0.453769	0.65	1	3.62413	6.62228
chr1:9410105-9410392	7.12039	-1.74	1.63965	-1.05934	0.29	1	10.8724	3.31114
chr1:9414068-9414538	19.4442	-0.79	0.887169	-0.892063	0.37	1	24.4629	14.3483
chr1:9417087-9417366	9.49386	0.11	1.27602	0.0870155	0.93	1	9.06033	9.93341
chr1:9423093-9423440	17.2533	-0.32	0.909451	-0.353979	0.72	1	19.0267	15.452
chr1:9423700-9423930	13.4192	-0.06	1.03378	-0.0569671	0.95	1	13.5905	13.2446
chr1:9425891-9426688	64.9964	0.13	0.470663	0.275714	0.78	1	61.6102	68.4302
chr1:9428496-9428869	18.2574	-0.29	0.883882	-0.327538	0.74	1	19.9327	16.5557
chr1:9434620-9434979	10.8632	-1.98	1.3612	-1.45819	0.14	1	17.2146	4.41485
chr1:9441495-9442444	56.8719	-0.5	0.520939	-0.960813	0.34	1	66.1404	47.4596
chr1:9449499-9449718	7.7594	1.26	1.48812	0.848744	0.4	1	4.53016	11.0371
chr1:9454695-9455050	6.48138	0.04	1.57164	0.0258616	0.98	1	6.34223	6.62228
chr1:9457785-9457962	6.75524	-1.06	1.59368	-0.664429	0.51	1	9.06033	4.41485
chr1:9460288-9460461	5.38594	-0.54	1.79364	-0.30347	0.76	1	6.34223	4.41485
chr1:9464891-9465062	5.6598	1.07	1.76332	0.607031	0.54	1	3.62413	7.72599
chr1:9482544-9482741	6.66396	0.94	1.58124	0.595172	0.55	1	4.53016	8.8297
chr1:9490435-9490658	7.66812	0.85	1.45925	0.581119	0.56	1	5.4362	9.93341
chr1:9512084-9512573	15.884	-0.1	0.942054	-0.105656	0.92	1	16.3086	15.452
chr1:9556816-9556989	4.74693	-1.74	2.09998	-0.827128	0.41	1	7.24826	2.20743
chr1:9575366-9575859	9.22	-0.85	1.33663	-0.637752	0.52	1	11.7784	6.62228
chr1:9605081-9605344	10.2242	-0.74	1.25064	-0.589267	0.56	1	12.6845	7.72599
chr1:9612786-9613259	51.1208	-0.1	0.53155	-0.193947	0.85	1	52.5499	49.6671
chr1:9621381-9621998	50.8469	0.04	0.532017	0.0681638	0.95	1	49.8318	51.8745
chr1:9633762-9634522	69.013	-0.32	0.464223	-0.693476	0.49	1	76.1068	61.8079
chr1:9635905-9636139	13.9669	-1.13	1.07513	-1.05036	0.29	1	19.0267	8.8297
chr1:9641102-9641305	8.76356	-0.74	1.36407	-0.540266	0.59	1	10.8724	6.62228
chr1:9645431-9645604	6.93782	-0.15	1.51243	-0.1005	0.92	1	7.24826	6.62228
chr1:9658956-9659458	15.1537	-0.6	0.985091	-0.608532	0.54	1	18.1207	12.1408
chr1:9660528-9660726	6.75524	-1.06	1.59368	-0.664429	0.51	1	9.06033	4.41485
chr1:9667240-9667847	26.4733	-0.5	0.749939	-0.670053	0.5	1	30.8051	22.0743
chr1:9669489-9669830	24.7388	0.44	0.767494	0.573181	0.57	1	20.8388	28.6965
chr1:9681940-9682177	5.6598	-2.06	1.93184	-1.06576	0.29	1	9.06033	2.20743
chr1:9694346-9695174	79.9675	0.32	0.430997	0.736624	0.46	1	70.6706	89.4007
chr1:9699127-9699467	10.7719	-0.54	1.19945	-0.453805	0.65	1	12.6845	8.8297
chr1:9704206-9704429	10.8632	-0.27	1.18107	-0.22647	0.82	1	11.7784	9.93341
chr1:9706590-9706951	11.8673	1.17	1.17139	0.998749	0.32	1	7.24826	16.5557
chr1:9711552-9711811	14.1495	-0.66	1.02651	-0.645842	0.52	1	17.2146	11.0371
chr1:9719486-9719875	10.5893	0.4	1.20034	0.333688	0.74	1	9.06033	12.1408
chr1:9722620-9723167	33.5024	-0.83	0.69836	-1.19154	0.23	1	42.5835	24.2817
chr1:9733482-9733673	6.75524	1.43	1.61973	0.884691	0.38	1	3.62413	9.93341
chr1:9737769-9738005	8.12455	0.63	1.40293	0.445928	0.66	1	6.34223	9.93341
chr1:9738670-9738896	8.21584	-1	1.43324	-0.697718	0.49	1	10.8724	5.51856
chr1:9740973-9741480	19.9006	-0.03	0.843186	-0.0313937	0.97	1	19.9327	19.8668
chr1:9748307-9748515	8.39841	-0.25	1.369	-0.183736	0.85	1	9.06033	7.72599
chr1:9757951-9758435	41.1705	-0.51	0.609954	-0.837257	0.4	1	48.0197	34.2151
chr1:9760851-9761268	22.2741	-0.93	0.846194	-1.09858	0.27	1	28.9931	15.452
chr1:9773009-9773182	6.93782	-0.15	1.51243	-0.1005	0.92	1	7.24826	6.62228
chr1:9773410-9773583	6.29881	-0.91	1.6459	-0.550997	0.58	1	8.1543	4.41485
chr1:9789248-9789707	66.6396	-0.04	0.46405	-0.0851798	0.93	1	67.0464	66.2228
chr1:9791075-9791316	18.5313	0.19	0.873088	0.21193	0.83	1	17.2146	19.8668
chr1:9798454-9798777	6.20752	1.26	1.68164	0.751074	0.45	1	3.62413	8.8297
chr1:9809615-9809786	5.38594	3.43	2.30661	1.48831	0.14	1	0.906033	9.93341
chr1:9819024-9819287	7.21168	-1.2	1.55342	-0.770166	0.44	1	9.96636	4.41485
chr1:9823376-9823624	5.29465	-1.15	1.86855	-0.616517	0.54	1	7.24826	3.31114
chr1:9831649-9831885	9.12871	-1.22	1.3813	-0.884957	0.38	1	12.6845	5.51856
chr1:9837959-9838358	11.4109	1.36	1.21925	1.11755	0.26	1	6.34223	16.5557
chr1:9843309-9843715	15.5188	0.17	0.953205	0.178269	0.86	1	14.4965	16.5557
chr1:9849321-9849567	11.137	0.53	1.16861	0.450168	0.65	1	9.06033	13.2446
chr1:9853819-9854173	9.85901	1.38	1.32761	1.03834	0.3	1	5.4362	14.3483
chr1:9881997-9882205	5.29465	-1.15	1.86855	-0.616517	0.54	1	7.24826	3.31114
chr1:9882238-9882432	5.29465	2.26	2.01837	1.12121	0.26	1	1.81207	8.8297
chr1:9887632-9887847	16.9794	1.07	0.960845	1.11401	0.27	1	10.8724	23.178
chr1:9932408-9932909	17.5271	1.14	0.95377	1.19264	0.23	1	10.8724	24.2817
chr1:9935881-9936605	27.5687	0.21	0.722193	0.291568	0.77	1	25.3689	29.8002
chr1:9950391-9950564	5.6598	-2.06	1.93184	-1.06576	0.29	1	9.06033	2.20743
chr1:9950762-9951198	8.94614	-0.06	1.31977	-0.0446222	0.96	1	9.06033	8.8297
chr1:9952949-9953151	4.74693	-1.74	2.09998	-0.827128	0.41	1	7.24826	2.20743
chr1:9962888-9963072	9.31128	1.26	1.35695	0.930792	0.35	1	5.4362	13.2446
chr1:9983663-9983847	5.20336	-1.91	2.00638	-0.950408	0.34	1	8.1543	2.20743
chr1:9999489-10000280	60.5233	0.14	0.488089	0.294488	0.77	1	57.0801	64.0153
chr1:10007327-10007665	6.20752	-1.47	1.72824	-0.852846	0.39	1	9.06033	3.31114
chr1:10007822-10008173	10.8632	-0.27	1.18107	-0.22647	0.82	1	11.7784	9.93341
chr1:10015218-10015537	11.8673	-0.22	1.117	-0.199096	0.84	1	12.6845	11.0371
chr1:10020272-10020571	5.93366	-0.22	1.66767	-0.133352	0.89	1	6.34223	5.51856
chr1:10024467-10024804	21.2699	0.54	0.829739	0.649204	0.52	1	17.2146	25.3854
chr1:10035825-10036495	37.519	0.15	0.621727	0.237336	0.81	1	35.3353	39.7337
chr1:10043898-10044113	5.75109	-1.32	1.79105	-0.738068	0.46	1	8.1543	3.31114
chr1:10046662-10047107	5.93366	-0.22	1.66767	-0.133352	0.89	1	6.34223	5.51856
chr1:10050081-10050254	5.38594	-0.54	1.79364	-0.30347	0.76	1	6.34223	4.41485
chr1:10065885-10066649	66.6396	-0.04	0.46405	-0.0851798	0.93	1	67.0464	66.2228
chr1:10099430-10099715	7.21168	-1.2	1.55342	-0.770166	0.44	1	9.96636	4.41485
chr1:10112809-10112982	5.38594	-0.54	1.79364	-0.30347	0.76	1	6.34223	4.41485
chr1:10136452-10136801	16.3404	-0.18	0.929966	-0.190906	0.85	1	17.2146	15.452
chr1:10147661-10147885	8.39841	-0.25	1.369	-0.183736	0.85	1	9.06033	7.72599
chr1:10160134-10160383	6.20752	1.26	1.68164	0.751074	0.45	1	3.62413	8.8297
chr1:10175015-10175220	9.12871	0.58	1.3175	0.443996	0.66	1	7.24826	11.0371
chr1:10189177-10189362	5.6598	-2.06	1.93184	-1.06576	0.29	1	9.06033	2.20743
chr1:10200228-10201381	122.507	0.13	0.34941	0.381786	0.7	1	115.972	129.134
chr1:10219908-10220299	19.4442	-0.79	0.887169	-0.892063	0.37	1	24.4629	14.3483
chr1:10224532-10224795	12.1412	-0.82	1.13447	-0.726703	0.47	1	15.4026	8.8297
chr1:10231989-10232200	7.94198	-0.1	1.40589	-0.0707967	0.94	1	8.1543	7.72599
chr1:10234778-10235289	12.6889	0.61	1.08353	0.563859	0.57	1	9.96636	15.452
chr1:10255201-10255561	9.95029	-1.82	1.40049	-1.3027	0.19	1	15.4026	4.41485
chr1:10279335-10279742	8.30713	-0.61	1.39375	-0.438696	0.66	1	9.96636	6.62228
chr1:10317558-10317853	12.415	-0.08	1.08371	-0.0783294	0.94	1	12.6845	12.1408
chr1:10327763-10328169	11.4109	1.36	1.21925	1.11755	0.26	1	6.34223	16.5557
chr1:10329418-10329615	6.20752	-1.47	1.72824	-0.852846	0.39	1	9.06033	3.31114
chr1:10332845-10333018	6.20752	-1.47	1.72824	-0.852846	0.39	1	9.06033	3.31114
chr1:10341881-10342110	6.11624	0.75	1.65252	0.452923	0.65	1	4.53016	7.72599
chr1:10366555-10366866	6.75524	-1.06	1.59368	-0.664429	0.51	1	9.06033	4.41485
chr1:10372519-10373064	34.2327	-0.12	0.651045	-0.17737	0.86	1	35.3353	33.1114
chr1:10373420-10373626	10.4067	-0.15	1.20964	-0.125658	0.9	1	10.8724	9.93341
chr1:10388528-10388832	20.1744	-1.23	0.916239	-1.34433	0.18	1	28.087	12.1408
chr1:10391167-10391757	51.1208	-0.42	0.543185	-0.76408	0.44	1	57.9861	44.1485
chr1:10399762-10400079	9.85901	-0.32	1.25474	-0.256567	0.8	1	10.8724	8.8297
chr1:10415523-10415832	6.3901	2.58	1.87107	1.38154	0.17	1	1.81207	11.0371
chr1:10416796-10417003	5.84237	2.43	1.93576	1.25684	0.21	1	1.81207	9.93341
chr1:10422830-10423861	56.2328	-0.02	0.505516	-0.0370628	0.97	1	56.174	56.2893
chr1:10440808-10440987	5.29465	2.26	2.01837	1.12121	0.26	1	1.81207	8.8297
chr1:10446360-10446682	5.75109	1.68	1.81823	0.922916	0.36	1	2.7181	8.8297
chr1:10448019-10448427	17.3445	-0.15	0.902314	-0.168457	0.87	1	18.1207	16.5557
chr1:10483548-10483963	18.5313	-0.68	0.898225	-0.757472	0.45	1	22.6508	14.3483
chr1:10496860-10497137	7.94198	2.26	1.61806	1.39861	0.16	1	2.7181	13.2446
chr1:10500438-10500931	16.8881	-0.08	0.913039	-0.0854298	0.93	1	17.2146	16.5557
chr1:10522666-10523261	12.3238	-0.32	1.09453	-0.294123	0.77	1	13.5905	11.0371
chr1:10530196-10530402	10.5893	0.4	1.20034	0.333688	0.74	1	9.06033	12.1408
chr1:10532941-10533145	4.65564	-2.91	2.41067	-1.20583	0.23	1	8.1543	1.10371
chr1:10538658-10538832	8.76356	1.14	1.38753	0.819803	0.41	1	5.4362	12.1408
chr1:10567333-10567504	5.6598	1.07	1.76332	0.607031	0.54	1	3.62413	7.72599
chr1:10578062-10578790	22.9131	-0.69	0.815389	-0.847644	0.4	1	28.087	17.6594
chr1:10600142-10600535	11.4109	-0.12	1.1421	-0.101108	0.92	1	11.7784	11.0371
chr1:10603447-10603618	5.75109	1.68	1.81823	0.922916	0.36	1	2.7181	8.8297
chr1:10606998-10607263	6.57267	-2.32	1.82361	-1.27325	0.2	1	10.8724	2.20743
chr1:10616073-10616420	8.39841	-0.25	1.369	-0.183736	0.85	1	9.06033	7.72599
chr1:10630977-10631407	6.48138	0.04	1.57164	0.0258616	0.98	1	6.34223	6.62228
chr1:10636987-10637207	6.75524	-1.06	1.59368	-0.664429	0.51	1	9.06033	4.41485
chr1:10661195-10661491	8.03326	0.26	1.39812	0.188136	0.85	1	7.24826	8.8297
chr1:10662160-10662404	7.21168	1.11	1.52886	0.726707	0.47	1	4.53016	9.93341
chr1:10679700-10679946	5.11208	0.85	1.86879	0.453769	0.65	1	3.62413	6.62228
chr1:10709924-10710267	6.84653	2	1.69066	1.18297	0.24	1	2.7181	11.0371
chr1:10728051-10728423	38.5232	0.15	0.613572	0.245384	0.81	1	36.2413	40.8374
chr1:10730149-10730616	18.6226	0.34	0.874576	0.389947	0.7	1	16.3086	20.9705
chr1:10738172-10738420	8.21584	-1	1.43324	-0.697718	0.49	1	10.8724	5.51856
chr1:10744128-10744345	9.58514	0.42	1.27483	0.325565	0.74	1	8.1543	11.0371
chr1:10749290-10749529	11.0457	0.26	1.166	0.225588	0.82	1	9.96636	12.1408
chr1:10760621-10761055	21.7263	-0.27	0.813268	-0.328894	0.74	1	23.5569	19.8668
chr1:10763392-10763917	59.7018	-0.56	0.513599	-1.09606	0.27	1	70.6706	48.5634
chr1:10767147-10767514	23.3695	0.64	0.799604	0.802331	0.42	1	18.1207	28.6965
chr1:10774156-10774372	5.6598	-2.06	1.93184	-1.06576	0.29	1	9.06033	2.20743
chr1:10777917-10778101	5.75109	1.68	1.81823	0.922916	0.36	1	2.7181	8.8297
chr1:10782676-10782912	4.74693	-1.74	2.09998	-0.827128	0.41	1	7.24826	2.20743
chr1:10797116-10797561	12.7802	-0.42	1.07444	-0.386279	0.7	1	14.4965	11.0371
chr1:10800119-10800380	15.0624	0.26	0.969985	0.271175	0.79	1	13.5905	16.5557
chr1:10802800-10803235	10.7719	-0.54	1.19945	-0.453805	0.65	1	12.6845	8.8297
chr1:10809477-10809861	12.3238	-0.32	1.09453	-0.294123	0.77	1	13.5905	11.0371
chr1:10819696-10820134	23.0043	0.14	0.786707	0.174785	0.86	1	21.7448	24.2817
chr1:10820625-10821080	25.3778	0.61	0.767442	0.796097	0.43	1	19.9327	30.904
chr1:10821642-10821859	17.8923	-0.06	0.887393	-0.0663652	0.95	1	18.1207	17.6594
chr1:10822080-10822543	61.7101	-0.02	0.482237	-0.0354034	0.97	1	61.6102	61.8079
chr1:10828957-10829326	20.4483	0.05	0.832167	0.0619248	0.95	1	19.9327	20.9705
chr1:10831333-10831618	11.6847	-0.74	1.15394	-0.638646	0.52	1	14.4965	8.8297
chr1:10846302-10846495	6.93782	-0.15	1.51243	-0.1005	0.92	1	7.24826	6.62228
chr1:10855431-10856041	20.2657	1.43	0.929036	1.54242	0.12	1	10.8724	29.8002
chr1:10861718-10861982	10.2242	0.85	1.25006	0.678368	0.5	1	7.24826	13.2446
chr1:10883618-10883922	10.6806	0.68	1.20674	0.561906	0.57	1	8.1543	13.2446
chr1:10907217-10907430	7.85069	-0.47	1.42695	-0.332125	0.74	1	9.06033	6.62228
chr1:10909673-10909996	5.6598	-2.06	1.93184	-1.06576	0.29	1	9.06033	2.20743
chr1:10911838-10912041	10.9545	0	1.17009	1.96929e-06	1	1	10.8724	11.0371
chr1:10928988-10929431	5.56851	0.53	1.74498	0.301476	0.76	1	4.53016	6.62228
chr1:10988197-10988568	19.718	-0.32	0.85341	-0.377223	0.71	1	21.7448	17.6594
chr1:11001655-11001913	6.75524	-1.06	1.59368	-0.664429	0.51	1	9.06033	4.41485
chr1:11002382-11003064	67.096	-0.06	0.462648	-0.127296	0.9	1	67.9525	66.2228
chr1:11017364-11017618	5.56851	0.53	1.74498	0.301476	0.76	1	4.53016	6.62228
chr1:11018965-11019541	18.5313	-0.68	0.898225	-0.757472	0.45	1	22.6508	14.3483
chr1:11024318-11024783	18.8964	-0.91	0.908632	-0.99808	0.32	1	24.4629	13.2446
chr1:11029928-11030179	6.3901	-0.42	1.59686	-0.259905	0.79	1	7.24826	5.51856
chr1:11038788-11038976	8.39841	-0.25	1.369	-0.183736	0.85	1	9.06033	7.72599
chr1:11052348-11052542	7.12039	-1.74	1.63965	-1.05934	0.29	1	10.8724	3.31114
chr1:11054496-11054760	9.85901	-0.32	1.25474	-0.256567	0.8	1	10.8724	8.8297
chr1:11065290-11065524	6.11624	-2.2	1.87197	-1.1733	0.24	1	9.96636	2.20743
chr1:11080682-11081110	10.7719	-0.54	1.19945	-0.453805	0.65	1	12.6845	8.8297
chr1:11089156-11089483	10.6806	-0.84	1.22618	-0.682196	0.5	1	13.5905	7.72599
chr1:11091555-11091781	16.9794	0.09	0.90997	0.102323	0.92	1	16.3086	17.6594
chr1:11101692-11102016	6.66396	0.94	1.58124	0.595172	0.55	1	4.53016	8.8297
chr1:11103610-11103783	8.03326	0.26	1.39812	0.188136	0.85	1	7.24826	8.8297
chr1:11107266-11107711	22.4566	0.79	0.825247	0.961591	0.34	1	16.3086	28.6965
chr1:11114112-11114512	13.7844	-0.36	1.02549	-0.355921	0.72	1	15.4026	12.1408
chr1:11135814-11136498	38.797	-0.44	0.623757	-0.713073	0.48	1	44.3956	33.1114
chr1:11138839-11139029	11.6847	0.64	1.14053	0.562498	0.57	1	9.06033	14.3483
chr1:11141151-11141517	21.4525	-0.69	0.840575	-0.818552	0.41	1	26.275	16.5557
chr1:11141845-11142092	16.523	0.18	0.923147	0.19019	0.85	1	15.4026	17.6594
chr1:11145772-11146621	51.9424	-0.21	0.529745	-0.393153	0.69	1	55.268	48.5634
chr1:11147047-11147660	30.5812	-0.3	0.692298	-0.43704	0.66	1	33.5232	27.5928
chr1:11149865-11150089	13.3279	0.94	1.07533	0.875181	0.38	1	9.06033	17.6594
chr1:11152731-11152997	10.6806	-0.84	1.22618	-0.682196	0.5	1	13.5905	7.72599
chr1:11157276-11157737	43.9091	0.81	0.611377	1.31863	0.19	1	31.7111	56.2893
chr1:11162054-11162241	11.5022	-1.32	1.22298	-1.0809	0.28	1	16.3086	6.62228
chr1:11162430-11162813	30.4899	1.23	0.763329	1.60679	0.11	1	18.1207	43.0448
chr1:11163004-11163715	78.4156	-0.1	0.428784	-0.242952	0.81	1	80.6369	76.1562
chr1:11173566-11173778	6.3901	-0.42	1.59686	-0.259905	0.79	1	7.24826	5.51856
chr1:11182206-11182405	7.21168	1.11	1.52886	0.726707	0.47	1	4.53016	9.93341
chr1:11186190-11186416	4.9295	-0.32	1.89625	-0.169768	0.87	1	5.4362	4.41485
chr1:11191414-11192166	32.3156	-0.05	0.668581	-0.0731527	0.94	1	32.6172	32.0077
chr1:11194511-11194836	13.7844	-0.36	1.02549	-0.355921	0.72	1	15.4026	12.1408
chr1:11201115-11201747	11.0457	0.26	1.166	0.225588	0.82	1	9.96636	12.1408
chr1:11204592-11204880	18.5313	0.19	0.873088	0.21193	0.83	1	17.2146	19.8668
chr1:11206952-11207125	5.93366	-0.22	1.66767	-0.133352	0.89	1	6.34223	5.51856
chr1:11211517-11211721	5.38594	3.43	2.30661	1.48831	0.14	1	0.906033	9.93341
chr1:11212118-11212399	18.7139	0.5	0.878555	0.566272	0.57	1	15.4026	22.0743
chr1:11212625-11212946	12.415	-0.08	1.08371	-0.0783294	0.94	1	12.6845	12.1408
chr1:11285642-11286893	117.578	0.02	0.35411	0.0506124	0.96	1	115.972	119.201
chr1:11290142-11290716	35.6933	0.3	0.641222	0.473592	0.64	1	31.7111	39.7337
chr1:11290944-11291141	12.5976	-0.91	1.11716	-0.811781	0.42	1	16.3086	8.8297
chr1:11298996-11299591	53.0378	-0.14	0.522497	-0.275868	0.78	1	55.268	50.7708
chr1:11306176-11306427	7.66812	0.85	1.45925	0.581119	0.56	1	5.4362	9.93341
chr1:11316377-11316550	5.29465	-1.15	1.86855	-0.616517	0.54	1	7.24826	3.31114
chr1:11320781-11320999	7.21168	-1.2	1.55342	-0.770166	0.44	1	9.96636	4.41485
chr1:11359544-11359783	6.84653	-0.58	1.54196	-0.37936	0.7	1	8.1543	5.51856
chr1:11362214-11362722	26.382	-0.01	0.735649	-0.0135701	0.99	1	26.275	26.4891
chr1:11367212-11367444	7.7594	1.26	1.48812	0.848744	0.4	1	4.53016	11.0371
chr1:11367857-11368255	23.4608	-0.6	0.80006	-0.754565	0.45	1	28.087	18.7631
chr1:11377511-11378293	64.9964	-0.11	0.470919	-0.241078	0.81	1	67.0464	62.9116
chr1:11381799-11382014	15.0624	0.26	0.969985	0.271175	0.79	1	13.5905	16.5557
chr1:11385741-11386082	5.11208	-3.06	2.32227	-1.31719	0.19	1	9.06033	1.10371
chr1:11392857-11393506	31.1289	-0.77	0.715955	-1.07676	0.28	1	38.9594	23.178
chr1:11395914-11396408	25.4691	-1.22	0.827099	-1.469	0.14	1	35.3353	15.452
chr1:11398867-11399217	26.4733	0.1	0.734596	0.135499	0.89	1	25.3689	27.5928
chr1:11400259-11400548	30.0335	-0.36	0.700566	-0.515947	0.61	1	33.5232	26.4891
chr1:11401233-11401678	34.4152	-0.41	0.659274	-0.619381	0.54	1	38.9594	29.8002
chr1:11401827-11402066	18.2574	-0.29	0.883882	-0.327538	0.74	1	19.9327	16.5557
chr1:11402532-11402705	10.8632	-0.27	1.18107	-0.22647	0.82	1	11.7784	9.93341
chr1:11407439-11407721	21.8176	-0.88	0.850007	-1.03976	0.3	1	28.087	15.452
chr1:11416566-11416889	38.8883	0.04	0.609685	0.0666622	0.95	1	38.0534	39.7337
chr1:11424477-11424923	17.5271	-0.74	0.926159	-0.79572	0.43	1	21.7448	13.2446
chr1:11431185-11431375	6.20752	-1.47	1.72824	-0.852846	0.39	1	9.06033	3.31114
chr1:11439540-11439764	7.30297	-0.74	1.49886	-0.49168	0.62	1	9.06033	5.51856
chr1:11474024-11474479	17.8923	-0.06	0.887393	-0.0663652	0.95	1	18.1207	17.6594
chr1:11483943-11484144	7.85069	-0.47	1.42695	-0.332125	0.74	1	9.06033	6.62228
chr1:11485366-11485539	5.84237	-0.74	1.71213	-0.430435	0.67	1	7.24826	4.41485
chr1:11487818-11488239	8.76356	-0.74	1.36407	-0.540266	0.59	1	10.8724	6.62228
chr1:11503423-11503820	20.357	-0.09	0.834807	-0.108529	0.91	1	20.8388	19.8668
chr1:11507437-11507838	18.5313	-0.68	0.898225	-0.757472	0.45	1	22.6508	14.3483
chr1:11527866-11528131	8.03326	-1.96	1.58251	-1.23813	0.22	1	12.6845	3.31114
chr1:11541118-11541798	90.0091	-0.22	0.404249	-0.536694	0.59	1	96.0395	83.8822
chr1:11557777-11558063	6.75524	-1.06	1.59368	-0.664429	0.51	1	9.06033	4.41485
chr1:11569008-11569179	7.02911	0.26	1.50085	0.175259	0.86	1	6.34223	7.72599
chr1:11572916-11573177	8.85485	1.53	1.424	1.07168	0.28	1	4.53016	13.2446
chr1:11579878-11580049	5.6598	1.07	1.76332	0.607031	0.54	1	3.62413	7.72599
chr1:11584624-11584892	5.38594	3.43	2.30661	1.48831	0.14	1	0.906033	9.93341
chr1:11591128-11592114	73.3948	0.09	0.44236	0.194767	0.85	1	70.6706	76.1562
chr1:11599349-11599769	6.57267	-2.32	1.82361	-1.27325	0.2	1	10.8724	2.20743
chr1:11600784-11600982	7.66812	0.85	1.45925	0.581119	0.56	1	5.4362	9.93341
chr1:11604788-11605300	36.9713	0.11	0.625825	0.17084	0.86	1	35.3353	38.6299
chr1:11608272-11608748	41.9008	-0.32	0.594499	-0.54151	0.59	1	46.2077	37.5262
chr1:11614940-11615505	94.2083	0.2	0.394453	0.511174	0.61	1	86.9792	101.542
chr1:11648904-11649131	12.7802	-0.42	1.07444	-0.386279	0.7	1	14.4965	11.0371
chr1:11651567-11652012	12.5063	0.15	1.07839	0.136833	0.89	1	11.7784	13.2446
chr1:11661005-11661731	184.491	-0.13	0.297318	-0.427649	0.67	1	191.173	177.698
chr1:11670096-11670460	7.48554	2.85	1.78771	1.59309	0.11	1	1.81207	13.2446
chr1:11694647-11695005	23.6434	0.32	0.780051	0.415917	0.68	1	20.8388	26.4891
chr1:11707000-11707542	53.8594	0.05	0.516697	0.0946595	0.92	1	52.5499	55.1856
chr1:11712969-11713215	12.5976	0.38	1.07834	0.351016	0.73	1	10.8724	14.3483
chr1:11714640-11714990	9.31128	1.26	1.35695	0.930792	0.35	1	5.4362	13.2446
chr1:11728027-11728348	9.49386	0.11	1.27602	0.0870155	0.93	1	9.06033	9.93341
chr1:11728819-11729252	11.8673	-1.74	1.2579	-1.38084	0.17	1	18.1207	5.51856
chr1:11733122-11733548	15.5188	-0.87	0.993732	-0.879982	0.38	1	19.9327	11.0371
chr1:11739281-11739749	15.884	-0.1	0.942054	-0.105656	0.92	1	16.3086	15.452
chr1:11743706-11743950	11.9586	0.02	1.10808	0.0198798	0.98	1	11.7784	12.1408
chr1:11748203-11748475	18.0748	-0.62	0.904656	-0.686986	0.49	1	21.7448	14.3483
chr1:11757904-11758460	41.5356	-0.22	0.593441	-0.374749	0.71	1	44.3956	38.6299
chr1:11763208-11763399	8.4897	0.09	1.35656	0.0686382	0.95	1	8.1543	8.8297
chr1:11773066-11773317	7.30297	1.58	1.57349	1.00729	0.31	1	3.62413	11.0371
chr1:11776532-11776808	11.5022	0.14	1.13539	0.121109	0.9	1	10.8724	12.1408
chr1:11785403-11785725	14.6972	0.56	0.993685	0.566171	0.57	1	11.7784	17.6594
chr1:11809685-11809899	7.94198	-0.1	1.40589	-0.0707967	0.94	1	8.1543	7.72599
chr1:11811225-11811434	25.4691	0.09	0.748213	0.124444	0.9	1	24.4629	26.4891
chr1:11818772-11819142	16.8881	-0.08	0.913039	-0.0854298	0.93	1	17.2146	16.5557
chr1:11822016-11822415	22.2741	-0.19	0.801399	-0.236432	0.81	1	23.5569	20.9705
chr1:11822610-11822862	14.9711	0.07	0.970892	0.0725014	0.94	1	14.4965	15.452
chr1:11862446-11862617	5.84237	2.43	1.93576	1.25684	0.21	1	1.81207	9.93341
chr1:11878148-11878382	6.3901	2.58	1.87107	1.38154	0.17	1	1.81207	11.0371
chr1:11885590-11885926	10.4067	1.49	1.3002	1.14246	0.25	1	5.4362	15.452
chr1:11892171-11892387	5.84237	2.43	1.93576	1.25684	0.21	1	1.81207	9.93341
chr1:11907209-11907410	4.74693	-1.74	2.09998	-0.827128	0.41	1	7.24826	2.20743
chr1:11909005-11909407	10.3154	-0.44	1.2258	-0.356831	0.72	1	11.7784	8.8297
chr1:11927419-11927660	12.8715	-0.18	1.062	-0.173656	0.86	1	13.5905	12.1408
chr1:11949957-11950133	4.83822	-0.96	1.96616	-0.48793	0.63	1	6.34223	3.31114
chr1:11967150-11967403	8.76356	1.14	1.38753	0.819803	0.41	1	5.4362	12.1408
chr1:11981254-11981487	6.29881	1.85	1.74517	1.05892	0.29	1	2.7181	9.93341
chr1:11997044-11997215	5.6598	1.07	1.76332	0.607031	0.54	1	3.62413	7.72599
chr1:11998200-11998454	6.57267	-2.32	1.82361	-1.27325	0.2	1	10.8724	2.20743
chr1:12002901-12003156	9.85901	-0.32	1.25474	-0.256567	0.8	1	10.8724	8.8297
chr1:12015512-12015720	7.85069	-0.47	1.42695	-0.332125	0.74	1	9.06033	6.62228
chr1:12015930-12016178	7.39425	-0.32	1.46559	-0.219655	0.83	1	8.1543	6.62228
chr1:12035368-12035754	10.6806	-0.84	1.22618	-0.682196	0.5	1	13.5905	7.72599
chr1:12061848-12062207	7.7594	1.26	1.48812	0.848744	0.4	1	4.53016	11.0371
chr1:12070320-12071084	62.4404	0.62	0.504931	1.2213	0.22	1	48.9258	76.1562
chr1:12076393-12076899	80.5152	-0.06	0.422574	-0.139367	0.89	1	81.543	79.4673
chr1:12077235-12077423	17.7097	-0.39	0.900715	-0.431924	0.67	1	19.9327	15.452
chr1:12077598-12078618	65.179	0.22	0.47209	0.463134	0.64	1	59.7982	70.6376
chr1:12078740-12078953	14.7885	0.77	1.00241	0.763693	0.45	1	10.8724	18.7631
chr1:12084437-12084663	5.75109	1.68	1.81823	0.922916	0.36	1	2.7181	8.8297
chr1:12120614-12121041	35.602	0.22	0.639714	0.347645	0.73	1	32.6172	38.6299
chr1:12132572-12132829	13.4192	-0.06	1.03378	-0.0569671	0.95	1	13.5905	13.2446
chr1:12137305-12137986	28.3903	0.57	0.727016	0.788669	0.43	1	22.6508	34.2151
chr1:12146805-12147146	14.7885	-0.32	0.984151	-0.32711	0.74	1	16.3086	13.2446
chr1:12147949-12148134	5.84237	2.43	1.93576	1.25684	0.21	1	1.81207	9.93341
chr1:12152272-12152664	9.03742	-1.64	1.44421	-1.13823	0.26	1	13.5905	4.41485
chr1:12169302-12169636	11.137	0.53	1.16861	0.450168	0.65	1	9.06033	13.2446
chr1:12173517-12174140	37.1538	-0.16	0.626008	-0.260746	0.79	1	38.9594	35.3188
chr1:12175089-12175524	9.22	-0.85	1.33663	-0.637752	0.52	1	11.7784	6.62228
chr1:12181286-12181475	6.84653	2	1.69066	1.18297	0.24	1	2.7181	11.0371
chr1:12189906-12190077	7.30297	1.58	1.57349	1.00729	0.31	1	3.62413	11.0371
chr1:12193309-12193607	14.0582	-0.89	1.04801	-0.848242	0.4	1	18.1207	9.93341
chr1:12210632-12211247	42.2659	-0.04	0.584751	-0.0746061	0.94	1	42.5835	41.9411
chr1:12218652-12219074	22.8218	-0.12	0.790473	-0.146084	0.88	1	23.5569	22.0743
chr1:12222935-12223440	58.2412	-0.01	0.496546	-0.0182147	0.99	1	57.9861	58.4968
chr1:12232887-12233363	26.8384	-0.06	0.730047	-0.0806693	0.94	1	27.181	26.4891
chr1:12237612-12237984	12.415	-0.08	1.08371	-0.0783294	0.94	1	12.6845	12.1408
chr1:12244206-12244833	37.7016	0.3	0.623981	0.483203	0.63	1	33.5232	41.9411
chr1:12249060-12250019	92.2	-0.32	0.404349	-0.780269	0.44	1	101.476	82.7785
chr1:12259406-12259780	14.9711	-1.03	1.02619	-1.00027	0.32	1	19.9327	9.93341
chr1:12263518-12263860	9.67643	-0.96	1.31054	-0.732028	0.46	1	12.6845	6.62228
chr1:12268845-12269339	28.4816	0.11	0.709785	0.156431	0.88	1	27.181	29.8002
chr1:12275367-12275701	16.523	0.18	0.923147	0.19019	0.85	1	15.4026	17.6594
chr1:12275956-12276285	17.8923	-0.06	0.887393	-0.0663652	0.95	1	18.1207	17.6594
chr1:12280765-12281182	26.2907	-0.12	0.73805	-0.162987	0.87	1	27.181	25.3854
chr1:12281327-12281515	8.58099	-1.54	1.46747	-1.05236	0.29	1	12.6845	4.41485
chr1:12284722-12285027	11.2283	-0.64	1.17555	-0.547702	0.58	1	13.5905	8.8297
chr1:12286879-12287057	7.30297	-0.74	1.49886	-0.49168	0.62	1	9.06033	5.51856
chr1:12287450-12287797	7.7594	-0.87	1.46352	-0.597506	0.55	1	9.96636	5.51856
chr1:12290135-12290441	16.2491	0.63	0.94678	0.660772	0.51	1	12.6845	19.8668
chr1:12292959-12293238	10.5893	0.4	1.20034	0.333688	0.74	1	9.06033	12.1408
chr1:12296366-12296537	6.11624	0.75	1.65252	0.452923	0.65	1	4.53016	7.72599
chr1:12297318-12297555	7.30297	-0.74	1.49886	-0.49168	0.62	1	9.06033	5.51856
chr1:12301999-12302384	6.75524	-1.06	1.59368	-0.664429	0.51	1	9.06033	4.41485
chr1:12302410-12302613	5.29465	2.26	2.01837	1.12121	0.26	1	1.81207	8.8297
chr1:12325842-12326272	21.7263	0.46	0.817969	0.568077	0.57	1	18.1207	25.3854
chr1:12332679-12333041	11.8673	1.17	1.17139	0.998749	0.32	1	7.24826	16.5557
chr1:12336174-12336483	11.776	-0.47	1.13208	-0.418636	0.68	1	13.5905	9.93341
chr1:12355262-12355523	9.58514	0.42	1.27483	0.325565	0.74	1	8.1543	11.0371
chr1:12355660-12356016	18.1661	0.42	0.887779	0.477034	0.63	1	15.4026	20.9705
chr1:12362975-12363148	6.93782	-0.15	1.51243	-0.1005	0.92	1	7.24826	6.62228
chr1:12366506-12366758	9.40257	-0.2	1.28616	-0.152698	0.88	1	9.96636	8.8297
chr1:12374970-12375461	14.3321	0.89	1.02887	0.866059	0.39	1	9.96636	18.7631
chr1:12390557-12390863	19.718	0.49	0.856865	0.566516	0.57	1	16.3086	23.178
chr1:12390993-12391304	10.0416	0.26	1.23607	0.2128	0.83	1	9.06033	11.0371
chr1:12399572-12399907	13.2366	-1.94	1.21741	-1.59239	0.11	1	20.8388	5.51856
chr1:12400518-12401073	9.67643	-0.96	1.31054	-0.732028	0.46	1	12.6845	6.62228
chr1:12405762-12406184	13.8756	-0.15	1.01517	-0.14973	0.88	1	14.4965	13.2446
chr1:12419958-12420370	11.0457	0.26	1.166	0.225588	0.82	1	9.96636	12.1408
chr1:12422146-12422344	5.93366	3.58	2.23532	1.60377	0.11	1	0.906033	11.0371
chr1:12454748-12454971	6.29881	1.85	1.74517	1.05892	0.29	1	2.7181	9.93341
chr1:12455449-12455626	5.84237	-0.74	1.71213	-0.430435	0.67	1	7.24826	4.41485
chr1:12457527-12457924	8.4897	-2.06	1.55929	-1.3204	0.19	1	13.5905	3.31114
chr1:12483346-12483519	7.02911	0.26	1.50085	0.175259	0.86	1	6.34223	7.72599
chr1:12484078-12484440	12.1412	0.5	1.10752	0.455112	0.65	1	9.96636	14.3483
chr1:12490271-12490513	5.47723	6.03	6.7818	0.888749	0.37	1	0	11.0371
chr1:12500508-12501277	26.1081	-0.34	0.747004	-0.461372	0.64	1	28.9931	23.178
chr1:12508170-12508682	8.21584	-1	1.43324	-0.697718	0.49	1	10.8724	5.51856
chr1:12509306-12509522	5.29465	-1.15	1.86855	-0.616517	0.54	1	7.24826	3.31114
chr1:12520202-12520439	10.7719	-0.54	1.19945	-0.453805	0.65	1	12.6845	8.8297
chr1:12523069-12523637	37.7016	0.3	0.623981	0.483203	0.63	1	33.5232	41.9411
chr1:12543187-12543503	13.6931	0.58	1.0349	0.565238	0.57	1	10.8724	16.5557
chr1:12546348-12546589	7.85069	-0.47	1.42695	-0.332125	0.74	1	9.06033	6.62228
chr1:12561666-12562066	27.1123	0.26	0.729076	0.360779	0.72	1	24.4629	29.8002
chr1:12564014-12564364	27.66	0.92	0.761351	1.20196	0.23	1	19.0267	36.4225
chr1:12572945-12574209	57.6934	-0.31	0.506454	-0.615375	0.54	1	63.4223	51.8745
chr1:12583287-12583493	12.5976	-0.91	1.11716	-0.811781	0.42	1	16.3086	8.8297
chr1:12583768-12584434	55.0461	-0.13	0.512435	-0.25229	0.8	1	57.0801	52.9782
chr1:12586774-12586964	16.523	-0.8	0.957532	-0.836623	0.4	1	20.8388	12.1408
chr1:12587474-12587941	39.9837	0.52	0.616429	0.842555	0.4	1	32.6172	47.4596
chr1:12589029-12589292	23.1869	-0.3	0.788961	-0.375673	0.71	1	25.3689	20.9705
chr1:12592451-12592817	29.4857	-0.42	0.709465	-0.59602	0.55	1	33.5232	25.3854
chr1:12602458-12602629	5.29465	2.26	2.01837	1.12121	0.26	1	1.81207	8.8297
chr1:12604723-12605124	14.7885	0.77	1.00241	0.763693	0.45	1	10.8724	18.7631
chr1:12609737-12610096	24.0085	0.14	0.770358	0.185292	0.85	1	22.6508	25.3854
chr1:12613611-12613982	29.3944	-0.53	0.716196	-0.733682	0.46	1	34.4292	24.2817
chr1:12617313-12617522	13.9669	0.06	1.00934	0.056062	0.96	1	13.5905	14.3483
chr1:12619212-12619447	9.49386	0.11	1.27602	0.0870155	0.93	1	9.06033	9.93341
chr1:12624362-12624764	13.3279	-0.28	1.04266	-0.266176	0.79	1	14.4965	12.1408
chr1:12628489-12628970	17.3445	0.78	0.927252	0.838616	0.4	1	12.6845	22.0743
chr1:12632360-12632827	20.7222	-0.29	0.83265	-0.352318	0.72	1	22.6508	18.7631
chr1:12640908-12641173	14.8798	-0.12	0.975568	-0.127092	0.9	1	15.4026	14.3483
chr1:12651508-12652165	32.4069	-0.45	0.680532	-0.662218	0.51	1	37.1473	27.5928
chr1:12655550-12655724	8.03326	0.26	1.39812	0.188136	0.85	1	7.24826	8.8297
chr1:12657369-12657838	22.4566	-0.64	0.819768	-0.785411	0.43	1	27.181	17.6594
chr1:12660900-12661123	10.2242	-0.74	1.25064	-0.589267	0.56	1	12.6845	7.72599
chr1:12670599-12671000	22.6392	0.33	0.796875	0.410561	0.68	1	19.9327	25.3854
chr1:12674152-12674375	8.94614	1.96	1.47951	1.32711	0.18	1	3.62413	14.3483
chr1:12678620-12678960	12.5063	0.15	1.07839	0.136833	0.89	1	11.7784	13.2446
chr1:12683431-12683757	13.8756	1.03	1.05871	0.971533	0.33	1	9.06033	18.7631
chr1:12691630-12691903	8.12455	0.63	1.40293	0.445928	0.66	1	6.34223	9.93341
chr1:12696898-12697248	10.9545	0	1.17009	1.96929e-06	1	1	10.8724	11.0371
chr1:12699036-12699254	9.03742	0.26	1.3137	0.200226	0.84	1	8.1543	9.93341
chr1:12705407-12705629	7.21168	-1.2	1.55342	-0.770166	0.44	1	9.96636	4.41485
chr1:12708215-12708432	7.57683	3.96	3.2207	1.23061	0.22	1	0.906033	14.3483
chr1:12710768-12711413	72.3907	-0.58	0.471138	-1.22873	0.22	1	86.0731	58.4968
chr1:12715678-12716471	72.9384	0.1	0.443969	0.235992	0.81	1	69.7645	76.1562
chr1:12721470-12722104	22.9131	0.72	0.812018	0.881197	0.38	1	17.2146	28.6965
chr1:12730752-12731170	15.6101	0.36	0.954289	0.373205	0.71	1	13.5905	17.6594
chr1:12735113-12735543	19.5354	0.19	0.851547	0.22199	0.82	1	18.1207	20.9705
chr1:12742056-12742311	7.7594	1.26	1.48812	0.848744	0.4	1	4.53016	11.0371
chr1:12745753-12745926	5.93366	-0.22	1.66767	-0.133352	0.89	1	6.34223	5.51856
chr1:12756273-12757177	52.0336	0.15	0.526997	0.288434	0.77	1	48.9258	55.1856
chr1:12763735-12763921	6.84653	2	1.69066	1.18297	0.24	1	2.7181	11.0371
chr1:12782821-12783123	5.6598	-2.06	1.93184	-1.06576	0.29	1	9.06033	2.20743
chr1:12786846-12787118	10.7719	-0.54	1.19945	-0.453805	0.65	1	12.6845	8.8297
chr1:12790543-12791339	45.0958	0.2	0.567592	0.350436	0.73	1	41.6775	48.5634
chr1:12797661-12797946	5.38594	-0.54	1.79364	-0.30347	0.76	1	6.34223	4.41485
chr1:12806941-12807190	7.30297	-0.74	1.49886	-0.49168	0.62	1	9.06033	5.51856
chr1:12820597-12821054	15.1537	-0.6	0.985091	-0.608532	0.54	1	18.1207	12.1408
chr1:12826446-12826888	15.4275	-1.09	1.01735	-1.072	0.28	1	20.8388	9.93341
chr1:12829033-12829288	7.21168	-1.2	1.55342	-0.770166	0.44	1	9.96636	4.41485
chr1:12839440-12839702	13.6018	-0.81	1.0612	-0.767964	0.44	1	17.2146	9.93341
chr1:12839974-12840221	9.95029	-0.03	1.24124	-0.0213251	0.98	1	9.96636	9.93341
chr1:12840683-12840854	6.29881	1.85	1.74517	1.05892	0.29	1	2.7181	9.93341
chr1:12845414-12846017	10.3154	-0.44	1.2258	-0.356831	0.72	1	11.7784	8.8297
chr1:12851736-12852131	10.498	0.13	1.20129	0.104498	0.92	1	9.96636	11.0371
chr1:12862456-12862779	15.884	-0.1	0.942054	-0.105656	0.92	1	16.3086	15.452
chr1:12862938-12863182	6.29881	-0.91	1.6459	-0.550997	0.58	1	8.1543	4.41485
chr1:12866874-12867298	11.4109	1.36	1.21925	1.11755	0.26	1	6.34223	16.5557
chr1:12874320-12874585	19.5354	-0.63	0.873229	-0.721515	0.47	1	23.5569	15.452
chr1:12882661-12883029	14.6972	0.56	0.993685	0.566171	0.57	1	11.7784	17.6594
chr1:12884251-12884672	17.162	0.43	0.912675	0.474386	0.64	1	14.4965	19.8668
chr1:12888760-12889071	5.11208	-3.06	2.32227	-1.31719	0.19	1	9.06033	1.10371
chr1:12890169-12890517	8.85485	1.53	1.424	1.07168	0.28	1	4.53016	13.2446
chr1:12916833-12917167	5.75109	-1.32	1.79105	-0.738068	0.46	1	8.1543	3.31114
chr1:12921736-12922001	14.6972	-0.53	0.99687	-0.527109	0.6	1	17.2146	12.1408
chr1:12950535-12950959	44.822	-0.35	0.576041	-0.604816	0.55	1	49.8318	39.7337
chr1:12956300-12956572	6.20752	1.26	1.68164	0.751074	0.45	1	3.62413	8.8297
chr1:12958493-12958687	8.03326	0.26	1.39812	0.188136	0.85	1	7.24826	8.8297
chr1:12959590-12959953	10.0416	0.26	1.23607	0.2128	0.83	1	9.06033	11.0371
chr1:12968216-12968616	36.0584	0.18	0.634829	0.288054	0.77	1	33.5232	38.6299
chr1:13009829-13010228	9.31128	1.26	1.35695	0.930792	0.35	1	5.4362	13.2446
chr1:13019382-13019914	12.1412	0.5	1.10752	0.455112	0.65	1	9.96636	14.3483
chr1:13037605-13038134	24.0998	0.26	0.771119	0.341109	0.73	1	21.7448	26.4891
chr1:13078754-13078929	8.03326	0.26	1.39812	0.188136	0.85	1	7.24826	8.8297
chr1:13096214-13096485	7.94198	-0.1	1.40589	-0.0707967	0.94	1	8.1543	7.72599
chr1:13114406-13114577	5.47723	0	1.75508	2.10477e-06	1	1	5.4362	5.51856
chr1:13119577-13119748	5.56851	0.53	1.74498	0.301476	0.76	1	4.53016	6.62228
chr1:13121506-13121686	8.94614	-0.06	1.31977	-0.0446222	0.96	1	9.06033	8.8297
chr1:13131235-13131627	10.2242	0.85	1.25006	0.678368	0.5	1	7.24826	13.2446
chr1:13131747-13131983	6.48138	0.04	1.57164	0.0258616	0.98	1	6.34223	6.62228
chr1:13156274-13156754	15.5188	-0.87	0.993732	-0.879982	0.38	1	19.9327	11.0371
chr1:13173967-13174138	6.11624	0.75	1.65252	0.452923	0.65	1	4.53016	7.72599
chr1:13179496-13179741	9.31128	-0.51	1.30589	-0.394037	0.69	1	10.8724	7.72599
chr1:13200428-13200969	37.3364	-0.01	0.622384	-0.0113335	0.99	1	37.1473	37.5262
chr1:13224652-13224920	19.718	0.49	0.856865	0.566516	0.57	1	16.3086	23.178
chr1:13230913-13231223	10.2242	-0.74	1.25064	-0.589267	0.56	1	12.6845	7.72599
chr1:13244038-13244504	51.8511	0.04	0.526757	0.0771566	0.94	1	50.7378	52.9782
chr1:13249349-13249580	7.12039	6.41	6.77826	0.945053	0.34	1	0	14.3483
chr1:13255886-13256085	9.85901	-0.32	1.25474	-0.256567	0.8	1	10.8724	8.8297
chr1:13266931-13267326	22.3653	-0.06	0.797581	-0.0738386	0.94	1	22.6508	22.0743
chr1:13267448-13267621	7.7594	-0.87	1.46352	-0.597506	0.55	1	9.96636	5.51856
chr1:13279397-13279804	54.4071	-0.51	0.532712	-0.954917	0.34	1	63.4223	45.2522
chr1:13280253-13280820	130.267	-0.05	0.339275	-0.137085	0.89	1	131.375	129.134
chr1:13281040-13281797	103.611	0.01	0.374519	0.0339409	0.97	1	102.382	104.853
chr1:13292039-13292353	25.6517	-0.95	0.795633	-1.18951	0.23	1	33.5232	17.6594
chr1:13292557-13293146	64.2661	-0.74	0.511886	-1.4397	0.15	1	79.7309	48.5634
chr1:13302000-13303097	84.258	-0.34	0.422727	-0.794845	0.43	1	93.3214	75.0525
chr1:13310331-13310749	17.9836	0.1	0.884873	0.115916	0.91	1	17.2146	18.7631
chr1:13313233-13313404	5.6598	1.07	1.76332	0.607031	0.54	1	3.62413	7.72599
chr1:13325465-13325952	15.7927	-0.28	0.949254	-0.299658	0.76	1	17.2146	14.3483
chr1:13328107-13328392	9.12871	-1.22	1.3813	-0.884957	0.38	1	12.6845	5.51856
chr1:13333785-13334162	16.9794	0.09	0.90997	0.102323	0.92	1	16.3086	17.6594
chr1:13342530-13343168	43.5439	0.16	0.576993	0.283365	0.78	1	40.7715	46.3559
chr1:13348730-13349341	19.6267	-0.47	0.862062	-0.549762	0.58	1	22.6508	16.5557
chr1:13353608-13353801	5.75109	1.68	1.81823	0.922916	0.36	1	2.7181	8.8297
chr1:13377390-13377709	30.5812	0.22	0.688034	0.313545	0.75	1	28.087	33.1114
chr1:13384928-13385304	9.12871	0.58	1.3175	0.443996	0.66	1	7.24826	11.0371
chr1:13386721-13386995	20.5396	-0.58	0.850399	-0.687866	0.49	1	24.4629	16.5557
chr1:13391815-13392074	19.2616	-0.26	0.860788	-0.30266	0.76	1	20.8388	17.6594
chr1:13394433-13394781	11.3196	-0.37	1.15529	-0.324068	0.75	1	12.6845	9.93341
chr1:13397620-13397997	20.7222	-1.11	0.891812	-1.24039	0.21	1	28.087	13.2446
chr1:13410182-13410618	22.1828	0.39	0.807045	0.488548	0.63	1	19.0267	25.3854
chr1:13417114-13417285	5.29465	2.26	2.01837	1.12121	0.26	1	1.81207	8.8297
chr1:13422403-13422603	6.3901	-0.42	1.59686	-0.259905	0.79	1	7.24826	5.51856
chr1:13424213-13424536	6.66396	0.94	1.58124	0.595172	0.55	1	4.53016	8.8297
chr1:13429141-13429375	13.1453	0.49	1.0551	0.460078	0.65	1	10.8724	15.452
chr1:13440965-13441145	7.30297	1.58	1.57349	1.00729	0.31	1	3.62413	11.0371
chr1:13480621-13481206	8.76356	1.14	1.38753	0.819803	0.41	1	5.4362	12.1408
chr1:13493984-13494155	6.20752	1.26	1.68164	0.751074	0.45	1	3.62413	8.8297
chr1:13495637-13495959	6.75524	-1.06	1.59368	-0.664429	0.51	1	9.06033	4.41485
chr1:13497251-13497696	22.3653	-0.06	0.797581	-0.0738386	0.94	1	22.6508	22.0743
chr1:13509376-13509979	18.7139	0.5	0.878555	0.566272	0.57	1	15.4026	22.0743
chr1:13515508-13515758	19.8093	-0.17	0.847149	-0.204289	0.84	1	20.8388	18.7631
chr1:13530871-13531193	26.2907	-0.12	0.73805	-0.162987	0.87	1	27.181	25.3854
chr1:13540068-13540804	44.5481	-0.55	0.589637	-0.933713	0.35	1	52.5499	36.4225
chr1:13546402-13547182	55.8677	0.06	0.507208	0.11156	0.91	1	54.362	57.3931
chr1:13547335-13547695	24.2824	-0.15	0.767349	-0.198087	0.84	1	25.3689	23.178
chr1:13550075-13550320	18.2574	-0.29	0.883882	-0.327538	0.74	1	19.9327	16.5557
chr1:13566505-13566871	16.3404	-0.18	0.929966	-0.190906	0.85	1	17.2146	15.452
chr1:13592635-13592867	9.76772	-0.63	1.27734	-0.493251	0.62	1	11.7784	7.72599
chr1:13596961-13597620	47.4693	0.8	0.589221	1.35173	0.18	1	34.4292	60.7042
chr1:13614192-13614467	15.2449	-0.4	0.971359	-0.41172	0.68	1	17.2146	13.2446
chr1:13643831-13644125	14.8798	-0.12	0.975568	-0.127092	0.9	1	15.4026	14.3483
chr1:13648382-13648584	9.85901	-2.32	1.4967	-1.55136	0.12	1	16.3086	3.31114
chr1:13653012-13653573	82.8887	-0.69	0.453794	-1.51244	0.13	1	101.476	64.0153
chr1:13654805-13654978	10.3154	-0.44	1.2258	-0.356831	0.72	1	11.7784	8.8297
chr1:13656841-13657219	29.6683	0.31	0.700456	0.445346	0.66	1	26.275	33.1114
chr1:13661664-13662309	67.5524	0.16	0.462168	0.337799	0.74	1	63.4223	71.7413
chr1:13662488-13662681	8.67227	-1.12	1.40628	-0.793209	0.43	1	11.7784	5.51856
chr1:13671846-13672092	9.31128	-0.51	1.30589	-0.394037	0.69	1	10.8724	7.72599
chr1:13677310-13677888	40.075	-0.61	0.624557	-0.971735	0.33	1	48.0197	32.0077
chr1:13685885-13686492	29.3032	-0.63	0.724226	-0.869961	0.38	1	35.3353	23.178
chr1:13686760-13686989	8.39841	-0.25	1.369	-0.183736	0.85	1	9.06033	7.72599
chr1:13696167-13696783	60.4321	0.36	0.495706	0.724724	0.47	1	52.5499	68.4302
chr1:13719292-13720102	83.8928	-0.1	0.414726	-0.234775	0.81	1	86.0731	81.6747
chr1:13728551-13728979	9.76772	-0.63	1.27734	-0.493251	0.62	1	11.7784	7.72599
chr1:13740057-13740587	29.4857	0.12	0.698364	0.16638	0.87	1	28.087	30.904
chr1:13767807-13768695	177.188	-0.28	0.309241	-0.911426	0.36	1	192.985	161.142
chr1:13777769-13778269	20.357	-0.89	0.877754	-1.01908	0.31	1	26.275	14.3483
chr1:13778851-13779265	57.876	-0.49	0.515643	-0.944425	0.34	1	67.0464	48.5634
chr1:13779655-13779931	30.3986	0.03	0.687965	0.0377873	0.97	1	29.8991	30.904
chr1:13780235-13780529	30.9463	-0.44	0.69455	-0.629766	0.53	1	35.3353	26.4891
chr1:13786230-13786447	8.03326	0.26	1.39812	0.188136	0.85	1	7.24826	8.8297
chr1:13786773-13786979	5.6598	-2.06	1.93184	-1.06576	0.29	1	9.06033	2.20743
chr1:13809124-13809386	5.29465	-1.15	1.86855	-0.616517	0.54	1	7.24826	3.31114
chr1:13811510-13811747	7.39425	-0.32	1.46559	-0.219655	0.83	1	8.1543	6.62228
chr1:13820383-13821215	51.8511	0.04	0.526757	0.0771566	0.94	1	50.7378	52.9782
chr1:13838310-13838726	7.02911	3.85	2.13945	1.79858	0.072	1	0.906033	13.2446
chr1:13846849-13847788	87.3617	-0.1	0.406696	-0.244741	0.81	1	89.6973	84.9859
chr1:13851466-13851826	25.3778	-0.02	0.749465	-0.0276961	0.98	1	25.3689	25.3854
chr1:13852036-13852347	29.2119	0.36	0.707283	0.512625	0.61	1	25.3689	33.1114
chr1:13919515-13919782	7.7594	1.26	1.48812	0.848744	0.4	1	4.53016	11.0371
chr1:13919850-13920121	10.8632	-0.27	1.18107	-0.22647	0.82	1	11.7784	9.93341
chr1:13920553-13920737	10.3154	1.16	1.27025	0.910149	0.36	1	6.34223	14.3483
chr1:13967596-13967808	11.3196	-0.37	1.15529	-0.324068	0.75	1	12.6845	9.93341
chr1:13968849-13969640	36.241	0.34	0.637828	0.538085	0.59	1	31.7111	40.8374
chr1:13976339-13976548	9.76772	-0.63	1.27734	-0.493251	0.62	1	11.7784	7.72599
chr1:13982638-13983278	12.5976	0.38	1.07834	0.351016	0.73	1	10.8724	14.3483
chr1:14065782-14066072	10.498	0.13	1.20129	0.104498	0.92	1	9.96636	11.0371
chr1:14083355-14084030	15.2449	1.92	1.11645	1.71536	0.086	1	6.34223	24.2817
chr1:14100480-14101019	12.8715	-0.18	1.062	-0.173656	0.86	1	13.5905	12.1408
chr1:14101181-14101558	12.6889	0.61	1.08353	0.563859	0.57	1	9.96636	15.452
chr1:14113622-14113873	6.84653	-0.58	1.54196	-0.37936	0.7	1	8.1543	5.51856
chr1:14119601-14119963	14.2408	-0.45	1.01029	-0.442901	0.66	1	16.3086	12.1408
chr1:14122096-14122377	8.76356	1.14	1.38753	0.819803	0.41	1	5.4362	12.1408
chr1:14125895-14126079	7.39425	-0.32	1.46559	-0.219655	0.83	1	8.1543	6.62228
chr1:14132206-14133062	57.0544	-0.12	0.502952	-0.229597	0.82	1	58.8921	55.1856
chr1:14134201-14134372	7.57683	0.46	1.44676	0.314968	0.75	1	6.34223	8.8297
chr1:14149894-14150141	10.9545	0	1.17009	1.96929e-06	1	1	10.8724	11.0371
chr1:14157343-14157523	5.84237	2.43	1.93576	1.25684	0.21	1	1.81207	9.93341
chr1:14163502-14163751	10.4067	-0.15	1.20964	-0.125658	0.9	1	10.8724	9.93341
chr1:14167225-14167573	19.8093	-1.01	0.899369	-1.12299	0.26	1	26.275	13.2446
chr1:14183912-14184083	5.47723	6.03	6.7818	0.888749	0.37	1	0	11.0371
chr1:14205807-14206140	17.6184	-0.56	0.911769	-0.614285	0.54	1	20.8388	14.3483
chr1:14209937-14210199	7.39425	2.14	1.65027	1.29524	0.2	1	2.7181	12.1408
chr1:14210622-14211032	7.85069	-0.47	1.42695	-0.332125	0.74	1	9.06033	6.62228
chr1:14220458-14220631	5.38594	-0.54	1.79364	-0.30347	0.76	1	6.34223	4.41485
chr1:14227297-14227771	15.5188	1.26	1.02239	1.23538	0.22	1	9.06033	22.0743
chr1:14236636-14236857	8.76356	1.14	1.38753	0.819803	0.41	1	5.4362	12.1408
chr1:14251091-14251346	6.84653	2	1.69066	1.18297	0.24	1	2.7181	11.0371
chr1:14251391-14251771	7.21168	-1.2	1.55342	-0.770166	0.44	1	9.96636	4.41485
chr1:14254660-14254833	6.11624	0.75	1.65252	0.452923	0.65	1	4.53016	7.72599
chr1:14285140-14285488	5.38594	-0.54	1.79364	-0.30347	0.76	1	6.34223	4.41485
chr1:14291991-14292213	5.38594	-0.54	1.79364	-0.30347	0.76	1	6.34223	4.41485
chr1:14292470-14292656	4.83822	-0.96	1.96616	-0.48793	0.63	1	6.34223	3.31114
chr1:14334924-14335154	7.12039	0.68	1.50597	0.450256	0.65	1	5.4362	8.8297
chr1:14341798-14342053	10.5893	0.4	1.20034	0.333688	0.74	1	9.06033	12.1408
chr1:14356960-14357399	8.12455	-1.44	1.49265	-0.962984	0.34	1	11.7784	4.41485
chr1:14368133-14368530	12.6889	0.61	1.08353	0.563859	0.57	1	9.96636	15.452
chr1:14384209-14384548	16.8881	-0.08	0.913039	-0.0854298	0.93	1	17.2146	16.5557
chr1:14385099-14385511	12.3238	-0.32	1.09453	-0.294123	0.77	1	13.5905	11.0371
chr1:14387371-14387682	18.6226	-1.47	0.978133	-1.50688	0.13	1	27.181	9.93341
chr1:14392202-14392431	4.65564	-2.91	2.41067	-1.20583	0.23	1	8.1543	1.10371
chr1:14406814-14407133	13.4192	-0.06	1.03378	-0.0569671	0.95	1	13.5905	13.2446
chr1:14411741-14411973	7.85069	-0.47	1.42695	-0.332125	0.74	1	9.06033	6.62228
chr1:14449629-14450443	82.7061	0.6	0.443979	1.35345	0.18	1	65.2344	100.438
chr1:14451320-14451605	36.7887	-0.05	0.627312	-0.0799004	0.94	1	37.1473	36.4225
chr1:14452228-14452547	36.1497	-0.62	0.657083	-0.945827	0.34	1	43.4896	28.6965
chr1:14457771-14458279	15.7014	-1.63	1.07525	-1.51597	0.13	1	23.5569	7.72599
chr1:14460288-14460577	9.22	-0.85	1.33663	-0.637752	0.52	1	11.7784	6.62228
chr1:14461573-14461764	8.94614	-0.06	1.31977	-0.0446222	0.96	1	9.06033	8.8297
chr1:14466625-14467068	17.801	-1.17	0.959969	-1.21871	0.22	1	24.4629	11.0371
chr1:14473075-14473599	21.3612	-0.07	0.815649	-0.0907242	0.93	1	21.7448	20.9705
chr1:14483110-14483688	57.3283	-0.81	0.546055	-1.48513	0.14	1	72.4826	41.9411
chr1:14487802-14488349	57.9673	-0.72	0.534251	-1.34547	0.18	1	71.5766	44.1485
chr1:14491161-14491414	19.3529	-0.11	0.855354	-0.127354	0.9	1	19.9327	18.7631
chr1:14491793-14491969	9.22	-0.85	1.33663	-0.637752	0.52	1	11.7784	6.62228
chr1:14498121-14498446	8.67227	0.78	1.36535	0.56953	0.57	1	6.34223	11.0371
chr1:14504743-14505191	12.5063	0.15	1.07839	0.136833	0.89	1	11.7784	13.2446
chr1:14508231-14508763	29.4857	0.12	0.698364	0.16638	0.87	1	28.087	30.904
chr1:14539701-14540055	18.44	0.03	0.874108	0.0326855	0.97	1	18.1207	18.7631
chr1:14540233-14540645	37.1538	0.26	0.62733	0.419293	0.68	1	33.5232	40.8374
chr1:14567686-14567966	14.5146	0.16	0.988195	0.165454	0.87	1	13.5905	15.452
chr1:14572056-14572838	72.2081	-0.22	0.449595	-0.479584	0.63	1	77.0128	67.3265
chr1:14590794-14591018	7.57683	-1.85	1.60841	-1.15172	0.25	1	11.7784	3.31114
chr1:14591368-14591762	24.9214	0.03	0.755881	0.0419512	0.97	1	24.4629	25.3854
chr1:14599882-14600554	47.1954	-0.41	0.564612	-0.726435	0.47	1	53.4559	40.8374
chr1:14603138-14603439	20.996	-0.64	0.845238	-0.75414	0.45	1	25.3689	16.5557
chr1:14604977-14605300	14.6972	-0.53	0.99687	-0.527109	0.6	1	17.2146	12.1408
chr1:14613649-14614105	14.2408	-0.45	1.01029	-0.442901	0.66	1	16.3086	12.1408
chr1:14616605-14616923	11.776	0.9	1.15263	0.781229	0.43	1	8.1543	15.452
chr1:14618583-14618787	8.67227	0.78	1.36535	0.56953	0.57	1	6.34223	11.0371
chr1:14619153-14619375	9.95029	-0.03	1.24124	-0.0213251	0.98	1	9.96636	9.93341
chr1:14622423-14622800	16.523	-0.8	0.957532	-0.836623	0.4	1	20.8388	12.1408
chr1:14626945-14627264	31.4028	0.03	0.677446	0.0495296	0.96	1	30.8051	32.0077
chr1:14627662-14628075	26.5645	0.21	0.734873	0.283842	0.78	1	24.4629	28.6965
chr1:14628609-14628999	32.5895	0.72	0.692845	1.03573	0.3	1	24.4629	40.8374
chr1:14630447-14630717	23.5521	0.2	0.778526	0.258996	0.8	1	21.7448	25.3854
chr1:14633626-14633815	16.8881	-0.08	0.913039	-0.0854298	0.93	1	17.2146	16.5557
chr1:14633972-14634159	13.3279	-0.28	1.04266	-0.266176	0.79	1	14.4965	12.1408
chr1:14636347-14636653	34.2327	-0.58	0.671637	-0.870948	0.38	1	40.7715	27.5928
chr1:14639900-14640073	16.7055	-0.43	0.928447	-0.461891	0.64	1	19.0267	14.3483
chr1:14641220-14641613	43.8178	0	0.573895	1.52365e-06	1	1	43.4896	44.1485
chr1:14642614-14642947	65.4528	-0.63	0.497294	-1.25744	0.21	1	78.8249	51.8745
chr1:14644201-14644677	64.7225	0	0.470721	-0.00864421	0.99	1	64.3283	65.1191
chr1:14646379-14646589	12.5976	-0.91	1.11716	-0.811781	0.42	1	16.3086	8.8297
chr1:14654383-14654908	37.7929	-0.91	0.668679	-1.35624	0.18	1	48.9258	26.4891
chr1:14660693-14661293	37.7016	-0.54	0.63874	-0.852176	0.39	1	44.3956	30.904
chr1:14672491-14673007	50.2992	-0.31	0.54218	-0.572042	0.57	1	55.268	45.2522
chr1:14675525-14675698	11.776	-0.47	1.13208	-0.418636	0.68	1	13.5905	9.93341
chr1:14678027-14678277	26.0168	0.15	0.741232	0.20507	0.84	1	24.4629	27.5928
chr1:14681720-14682117	52.6727	-0.07	0.523	-0.124319	0.9	1	53.4559	51.8745
chr1:14685365-14685811	32.5895	0.22	0.667687	0.327461	0.74	1	29.8991	35.3188
chr1:14687463-14687674	7.30297	-0.74	1.49886	-0.49168	0.62	1	9.06033	5.51856
chr1:14688063-14688241	8.85485	1.53	1.424	1.07168	0.28	1	4.53016	13.2446
chr1:14692418-14692692	13.5105	0.16	1.02961	0.151631	0.88	1	12.6845	14.3483
chr1:14693808-14694093	19.079	-0.57	0.879164	-0.652284	0.51	1	22.6508	15.452
chr1:14696237-14696731	30.4899	0.12	0.68748	0.176029	0.86	1	28.9931	32.0077
chr1:14699292-14699753	29.0293	0.72	0.729661	0.990141	0.32	1	21.7448	36.4225
chr1:14701541-14701746	5.75109	-1.32	1.79105	-0.738068	0.46	1	8.1543	3.31114
chr1:14703689-14703962	9.31128	1.26	1.35695	0.930792	0.35	1	5.4362	13.2446
chr1:14706268-14706443	7.12039	-1.74	1.63965	-1.05934	0.29	1	10.8724	3.31114
chr1:14708584-14708804	15.3362	-0.21	0.961616	-0.214689	0.83	1	16.3086	14.3483
chr1:14709902-14710120	9.67643	-0.96	1.31054	-0.732028	0.46	1	12.6845	6.62228
chr1:14711183-14711379	6.57267	0.49	1.56647	0.309888	0.76	1	5.4362	7.72599
chr1:14716679-14717360	26.1994	0.37	0.744404	0.502505	0.62	1	22.6508	29.8002
chr1:14719524-14719738	7.48554	0.07	1.44884	0.0485852	0.96	1	7.24826	7.72599
chr1:14735767-14735984	10.1329	0.55	1.23895	0.445976	0.66	1	8.1543	12.1408
chr1:14743905-14744276	17.5271	0.18	0.896739	0.201367	0.84	1	16.3086	18.7631
chr1:14746291-14746650	16.9794	-0.86	0.950268	-0.907633	0.36	1	21.7448	12.1408
chr1:14749127-14749385	18.9877	0.11	0.862224	0.128775	0.9	1	18.1207	19.8668
chr1:14751416-14752015	51.5772	-0.76	0.567107	-1.3356	0.18	1	64.3283	38.6299
chr1:14754066-14754469	33.3198	-0.04	0.65872	-0.0600061	0.95	1	33.5232	33.1114
chr1:14755429-14755710	31.494	0.13	0.677063	0.185407	0.85	1	29.8991	33.1114
chr1:14758207-14758584	30.216	-0.17	0.692099	-0.239572	0.81	1	31.7111	28.6965
chr1:14763798-14764058	8.94614	-0.06	1.31977	-0.0446222	0.96	1	9.06033	8.8297
chr1:14771334-14771619	10.2242	0.85	1.25006	0.678368	0.5	1	7.24826	13.2446
chr1:14773871-14774301	22.7305	-0.24	0.794978	-0.306831	0.76	1	24.4629	20.9705
chr1:14778284-14778627	22.4566	-0.64	0.819768	-0.785411	0.43	1	27.181	17.6594
chr1:14782840-14783035	14.0582	-0.89	1.04801	-0.848242	0.4	1	18.1207	9.93341
chr1:14783664-14784341	54.1332	-0.38	0.525932	-0.716422	0.47	1	60.7042	47.4596
chr1:14788417-14788829	32.1331	0.26	0.673291	0.390671	0.7	1	28.9931	35.3188
chr1:14789284-14789455	10.2242	0.85	1.25006	0.678368	0.5	1	7.24826	13.2446
chr1:14799115-14799336	9.03742	0.26	1.3137	0.200226	0.84	1	8.1543	9.93341
chr1:14805997-14806326	12.2325	-0.57	1.11123	-0.510282	0.61	1	14.4965	9.93341
chr1:14807897-14808553	20.357	-0.09	0.834807	-0.108529	0.91	1	20.8388	19.8668
chr1:14811118-14811684	29.1206	-0.85	0.743738	-1.13829	0.26	1	37.1473	20.9705
chr1:14811924-14812102	6.02495	-3.32	2.19732	-1.5118	0.13	1	10.8724	1.10371
chr1:14822755-14823320	72.482	-0.54	0.46732	-1.14839	0.25	1	85.1671	59.6005
chr1:14838056-14838436	19.2616	0.57	0.870315	0.652511	0.51	1	15.4026	23.178
chr1:14838684-14838929	21.0873	-0.49	0.834621	-0.589311	0.56	1	24.4629	17.6594
chr1:14840561-14840769	7.7594	-0.87	1.46352	-0.597506	0.55	1	9.96636	5.51856
chr1:14840984-14841355	18.44	0.03	0.874108	0.0326855	0.97	1	18.1207	18.7631
chr1:14848586-14848759	4.65564	-2.91	2.41067	-1.20583	0.23	1	8.1543	1.10371
chr1:14864567-14865048	21.2699	-0.99	0.869738	-1.1391	0.25	1	28.087	14.3483
chr1:14865978-14866151	5.75109	-1.32	1.79105	-0.738068	0.46	1	8.1543	3.31114
chr1:14906111-14906393	10.0416	0.26	1.23607	0.2128	0.83	1	9.06033	11.0371
chr1:14957155-14957814	21.8176	-0.13	0.808271	-0.164416	0.87	1	22.6508	20.9705
chr1:14961407-14961694	12.8715	1.09	1.11033	0.984492	0.32	1	8.1543	17.6594
chr1:14972212-14972385	5.93366	-0.22	1.66767	-0.133352	0.89	1	6.34223	5.51856
chr1:14981488-14981781	8.03326	2.96	1.75891	1.68483	0.092	1	1.81207	14.3483
chr1:14982995-14983403	12.2325	0.75	1.1158	0.670787	0.5	1	9.06033	15.452
chr1:14989065-14989335	7.85069	1.72	1.53732	1.12043	0.26	1	3.62413	12.1408
chr1:14992993-14993164	5.20336	1.49	1.91129	0.777186	0.44	1	2.7181	7.72599
chr1:14993897-14994167	9.85901	1.38	1.32761	1.03834	0.3	1	5.4362	14.3483
chr1:15014316-15014800	16.0665	-0.74	0.965554	-0.763254	0.45	1	19.9327	12.1408
chr1:15018157-15018488	9.67643	0.72	1.28253	0.563316	0.57	1	7.24826	12.1408
chr1:15039028-15039414	16.523	-0.8	0.957532	-0.836623	0.4	1	20.8388	12.1408
chr1:15069620-15069793	4.74693	-1.74	2.09998	-0.827128	0.41	1	7.24826	2.20743
chr1:15071661-15072094	10.9545	0	1.17009	1.96929e-06	1	1	10.8724	11.0371
chr1:15092005-15092242	5.11208	0.85	1.86879	0.453769	0.65	1	3.62413	6.62228
chr1:15110350-15110698	13.8756	1.03	1.05871	0.971533	0.33	1	9.06033	18.7631
chr1:15132002-15132257	5.38594	-0.54	1.79364	-0.30347	0.76	1	6.34223	4.41485
chr1:15137910-15138111	8.94614	-0.06	1.31977	-0.0446222	0.96	1	9.06033	8.8297
chr1:15147589-15147966	11.137	2.35	1.38354	1.6989	0.089	1	3.62413	18.7631
chr1:15153067-15153343	10.0416	0.26	1.23607	0.2128	0.83	1	9.06033	11.0371
chr1:15153519-15153858	10.498	1.85	1.34358	1.37542	0.17	1	4.53016	16.5557
chr1:15158594-15158822	7.30297	1.58	1.57349	1.00729	0.31	1	3.62413	11.0371
chr1:15177125-15177298	4.83822	-0.96	1.96616	-0.48793	0.63	1	6.34223	3.31114
chr1:15224866-15225164	13.1453	0.49	1.0551	0.460078	0.65	1	10.8724	15.452
chr1:15228352-15228640	8.76356	-0.74	1.36407	-0.540266	0.59	1	10.8724	6.62228
chr1:15244129-15244465	11.8673	-0.22	1.117	-0.199096	0.84	1	12.6845	11.0371
chr1:15253919-15254146	7.7594	1.26	1.48812	0.848744	0.4	1	4.53016	11.0371
chr1:15254165-15254373	5.6598	-2.06	1.93184	-1.06576	0.29	1	9.06033	2.20743
chr1:15260502-15261010	20.4483	0.05	0.832167	0.0619248	0.95	1	19.9327	20.9705
chr1:15265643-15265889	7.39425	2.14	1.65027	1.29524	0.2	1	2.7181	12.1408
chr1:15289641-15290102	12.5063	-1.18	1.14892	-1.0249	0.31	1	17.2146	7.72599
chr1:15303131-15303494	8.12455	4.07	3.2702	1.24468	0.21	1	0.906033	15.452
chr1:15312682-15313100	11.4109	-0.12	1.1421	-0.101108	0.92	1	11.7784	11.0371
chr1:15324490-15324870	12.7802	0.85	1.0943	0.77492	0.44	1	9.06033	16.5557
chr1:15354400-15355276	31.1289	-0.25	0.684606	-0.359299	0.72	1	33.5232	28.6965
chr1:15387046-15387858	84.4406	0.3	0.419081	0.709616	0.48	1	75.2007	93.8156
chr1:15397967-15398152	5.93366	3.58	2.23532	1.60377	0.11	1	0.906033	11.0371
chr1:15409203-15409397	6.75524	1.43	1.61973	0.884691	0.38	1	3.62413	9.93341
chr1:15436788-15436976	6.75524	1.43	1.61973	0.884691	0.38	1	3.62413	9.93341
chr1:15438710-15438882	8.03326	0.26	1.39812	0.188136	0.85	1	7.24826	8.8297
chr1:15441731-15441972	11.776	0.9	1.15263	0.781229	0.43	1	8.1543	15.452
chr1:15445901-15446298	18.9877	0.98	0.905794	1.08109	0.28	1	12.6845	25.3854
chr1:15446997-15447997	41.4443	0.47	0.603208	0.786692	0.43	1	34.4292	48.5634
chr1:15448163-15448715	9.31128	-0.51	1.30589	-0.394037	0.69	1	10.8724	7.72599
chr1:15475093-15475280	6.66396	-1.61	1.6782	-0.960208	0.34	1	9.96636	3.31114
chr1:15477335-15477722	6.75524	-1.06	1.59368	-0.664429	0.51	1	9.06033	4.41485
chr1:15493066-15493242	6.66396	0.94	1.58124	0.595172	0.55	1	4.53016	8.8297
chr1:15527248-15527419	6.75524	1.43	1.61973	0.884691	0.38	1	3.62413	9.93341
chr1:15557964-15558308	8.67227	0.78	1.36535	0.56953	0.57	1	6.34223	11.0371
chr1:15559665-15559999	9.22	-0.85	1.33663	-0.637752	0.52	1	11.7784	6.62228
chr1:15570587-15570824	7.7594	-0.87	1.46352	-0.597506	0.55	1	9.96636	5.51856
chr1:15604629-15604868	5.6598	1.07	1.76332	0.607031	0.54	1	3.62413	7.72599
chr1:15608035-15608511	12.6889	-0.65	1.09254	-0.599061	0.55	1	15.4026	9.93341
chr1:15613853-15614061	6.75524	-1.06	1.59368	-0.664429	0.51	1	9.06033	4.41485
chr1:15620755-15620977	4.83822	-0.96	1.96616	-0.48793	0.63	1	6.34223	3.31114
chr1:15629840-15630013	7.30297	-0.74	1.49886	-0.49168	0.62	1	9.06033	5.51856
chr1:15635320-15635671	7.7594	1.26	1.48812	0.848744	0.4	1	4.53016	11.0371
chr1:15642411-15642678	5.84237	2.43	1.93576	1.25684	0.21	1	1.81207	9.93341
chr1:15650662-15651529	46.8303	-0.32	0.562402	-0.572415	0.57	1	51.6439	41.9411
chr1:15662543-15662720	5.75109	1.68	1.81823	0.922916	0.36	1	2.7181	8.8297
chr1:15665989-15666286	12.3238	-0.32	1.09453	-0.294123	0.77	1	13.5905	11.0371
chr1:15670449-15670629	7.66812	-1.32	1.52075	-0.869254	0.38	1	10.8724	4.41485
chr1:15701150-15701604	16.7055	1.62	1.03106	1.56798	0.12	1	8.1543	25.3854
chr1:15702013-15702242	13.6931	0.58	1.0349	0.565238	0.57	1	10.8724	16.5557
chr1:15704120-15704989	24.9214	0.03	0.755881	0.0419512	0.97	1	24.4629	25.3854
chr1:15715738-15715974	10.8632	-0.27	1.18107	-0.22647	0.82	1	11.7784	9.93341
chr1:15717565-15717984	24.0085	0.14	0.770358	0.185292	0.85	1	22.6508	25.3854
chr1:15726604-15726926	15.5188	-0.87	0.993732	-0.879982	0.38	1	19.9327	11.0371
chr1:15734764-15735277	41.7182	-0.08	0.589049	-0.139377	0.89	1	42.5835	40.8374
chr1:15741196-15741735	33.2285	-0.61	0.682836	-0.895433	0.37	1	39.8654	26.4891
chr1:15759454-15759675	6.29881	-0.91	1.6459	-0.550997	0.58	1	8.1543	4.41485
chr1:15764634-15765228	37.3364	-0.01	0.622384	-0.0113335	0.99	1	37.1473	37.5262
chr1:15765451-15766181	73.9425	-0.54	0.463449	-1.1664	0.24	1	86.9792	60.7042
chr1:15766443-15766708	30.5812	0.22	0.688034	0.313545	0.75	1	28.087	33.1114
chr1:15770026-15770887	87.1792	-0.17	0.408705	-0.407036	0.68	1	91.5093	82.7785
chr1:15814328-15815550	180.383	0.11	0.299077	0.371248	0.71	1	172.146	188.735
chr1:15826443-15827192	88.2746	-0.13	0.40527	-0.316801	0.75	1	91.5093	84.9859
chr1:15845365-15845681	14.0582	-0.89	1.04801	-0.848242	0.4	1	18.1207	9.93341
chr1:15845854-15846201	13.5105	0.16	1.02961	0.151631	0.88	1	12.6845	14.3483
chr1:15855419-15856099	56.0503	-0.41	0.51874	-0.784239	0.43	1	63.4223	48.5634
chr1:15858035-15858463	31.3115	-0.57	0.698856	-0.816984	0.41	1	37.1473	25.3854
chr1:15861086-15861357	17.6184	-0.56	0.911769	-0.614285	0.54	1	20.8388	14.3483
chr1:15862735-15862915	9.40257	-0.2	1.28616	-0.152698	0.88	1	9.96636	8.8297
chr1:15866862-15867049	5.29465	2.26	2.01837	1.12121	0.26	1	1.81207	8.8297
chr1:15870673-15870981	15.884	-0.1	0.942054	-0.105656	0.92	1	16.3086	15.452
chr1:15878625-15878816	10.3154	1.16	1.27025	0.910149	0.36	1	6.34223	14.3483
chr1:15880740-15881098	44.822	-0.35	0.576041	-0.604816	0.55	1	49.8318	39.7337
chr1:15881448-15881852	17.8923	-0.06	0.887393	-0.0663652	0.95	1	18.1207	17.6594
chr1:15889376-15889789	17.5271	-0.74	0.926159	-0.79572	0.43	1	21.7448	13.2446
chr1:15892744-15892924	9.58514	0.42	1.27483	0.325565	0.74	1	8.1543	11.0371
chr1:15906523-15906867	56.4154	0.08	0.504906	0.166496	0.87	1	54.362	58.4968
chr1:15907430-15907857	25.104	0.26	0.756101	0.347884	0.73	1	22.6508	27.5928
chr1:15913441-15913699	12.5063	-1.18	1.14892	-1.0249	0.31	1	17.2146	7.72599
chr1:15917239-15917431	5.75109	-1.32	1.79105	-0.738068	0.46	1	8.1543	3.31114
chr1:15923333-15923578	11.2283	-0.64	1.17555	-0.547702	0.58	1	13.5905	8.8297
chr1:15923730-15924117	22.0915	-0.46	0.81468	-0.56078	0.57	1	25.3689	18.7631
chr1:15925010-15925183	10.0416	0.26	1.23607	0.2128	0.83	1	9.06033	11.0371
chr1:15928108-15928917	44.183	0.26	0.575214	0.457283	0.65	1	39.8654	48.5634
chr1:15945690-15945863	4.83822	-0.96	1.96616	-0.48793	0.63	1	6.34223	3.31114
chr1:15964561-15964849	10.1329	0.55	1.23895	0.445976	0.66	1	8.1543	12.1408
chr1:15971450-15971622	5.84237	2.43	1.93576	1.25684	0.21	1	1.81207	9.93341
chr1:15971906-15972194	14.5146	0.16	0.988195	0.165454	0.87	1	13.5905	15.452
chr1:15974438-15974733	8.21584	-1	1.43324	-0.697718	0.49	1	10.8724	5.51856
chr1:15984547-15984870	7.12039	-1.74	1.63965	-1.05934	0.29	1	10.8724	3.31114
chr1:15988093-15988264	5.75109	1.68	1.81823	0.922916	0.36	1	2.7181	8.8297
chr1:15995808-15996218	30.9463	0.08	0.682307	0.112299	0.91	1	29.8991	32.0077
chr1:16020093-16020266	4.65564	-2.91	2.41067	-1.20583	0.23	1	8.1543	1.10371
chr1:16021656-16022316	51.5772	0.18	0.529894	0.337749	0.74	1	48.0197	55.1856
chr1:16031300-16031617	17.2533	-0.32	0.909451	-0.353979	0.72	1	19.0267	15.452
chr1:16042941-16043436	24.4649	0.09	0.762829	0.112945	0.91	1	23.5569	25.3854
[truncated: 148,140 more rows]

## Sheet: RNAseq_matrix
gene_id	baseMean	log2FoldChange	lfcSE	stat	pvalue	padj	RNA_seq_mut	RNA_seq_wt
rpl24|NM_173235	708.832	-1.12	0.742096	-1.5081	0.13	0.91	450.052	963.968
cep97|XM_009305058	5.78514	5.51	5.30463	1.03819	0.3	0.91	11.6518	0
cep97|NM_198371	5.78514	5.51	5.30463	1.03819	0.3	0.91	11.6518	0
nfkbiz|XM_017355867	5.42357	5.41	5.43262	0.99659	0.32	0.91	10.9236	0
eed|NM_001017766	106.733	-0.45	1.17441	-0.379115	0.7	0.94	91.03	122.212
zgc:110091|NM_001017577	167.192	-0.84	1.019	-0.820781	0.41	0.91	120.888	212.842
tmem39a|NM_199632	18.8905	-1.45	2.55176	-0.568175	0.57	0.93	10.1954	27.4635
si:zfos-1011f11.1|NM_001115105	22.6648	0.25	2.30472	0.106429	0.92	0.99	24.7602	20.5976
si:zfos-1011f11.1|XM_017353526	22.6648	0.25	2.30472	0.106429	0.92	0.99	24.7602	20.5976
f10|NM_201462	3.97729	4.97	6.12192	0.811282	0.42	0.91	8.01064	0
pcid2|NM_001007381	16.6006	4.52	3.24767	1.39303	0.16	0.91	32.0426	1.37317
pcid2|XM_005168000	16.6006	4.52	3.24767	1.39303	0.16	0.91	32.0426	1.37317
cul4a|NM_201027	26.8641	1.95	2.24927	0.865767	0.39	0.91	42.9662	10.9854
grtp1a|NM_213402	9.80683	-1.26	3.4225	-0.36733	0.71	0.95	5.82592	13.7317
adprhl1|XM_005167996	9.05197	-2.39	3.63767	-0.658298	0.51	0.91	2.91296	15.1049
adprhl1|NM_001006033	20.1529	3.12	2.70585	1.15438	0.25	0.91	36.412	4.11952
dcun1d2b|NM_001002156	55.1682	0.06	1.54038	0.0420106	0.97	0.99	56.8027	53.5538
tfdp1b|XM_009305148	76.5326	0.94	1.37792	0.679084	0.5	0.91	101.225	52.1806
tfdp1b|XM_005167988	76.5326	0.94	1.37792	0.679084	0.5	0.91	101.225	52.1806
tfdp1b|NM_200776	76.5326	0.94	1.37792	0.679084	0.5	0.91	101.225	52.1806
cenpe|NM_001327759	44.2196	2.81	1.94208	1.44493	0.15	0.91	77.9217	10.9854
cenpe|XM_005168005	44.2196	2.81	1.94208	1.44493	0.15	0.91	77.9217	10.9854
cenpe|XM_005168006	44.2196	2.81	1.94208	1.44493	0.15	0.91	77.9217	10.9854
cenpe|XM_017355770	44.2196	2.81	1.94208	1.44493	0.15	0.91	77.9217	10.9854
gas6|NM_199978	118.963	-2.62	1.3642	-1.9214	0.055	0.91	33.499	203.23
pros1|NM_001077323	36.7281	-1.47	1.91015	-0.767371	0.44	0.91	19.6625	53.5538
zgc:92518|NM_001002361	434.419	-1.47	0.86032	-1.7135	0.087	0.91	231.58	634.406
ercc5|XM_003197605	5.062	5.31	5.57427	0.953409	0.34	0.91	10.1954	0
blzf1|NM_001144803	87.8872	-0.72	1.28392	-0.557281	0.58	0.93	66.9981	108.481
blzf1|XM_009305126	87.8872	-0.72	1.28392	-0.557281	0.58	0.93	66.9981	108.481
trmt10c|NM_001007332	81.9372	-3.22	1.60794	-2.00089	0.045	0.91	16.0213	146.93
txnl4b|NM_001037123	21.6309	3.87	2.76504	1.40035	0.16	0.91	40.7814	2.74635
txnl4b|NM_001290146	23.0454	3.34	2.59616	1.28563	0.2	0.91	42.2379	4.11952
mrpl16|XM_005168001	237.464	-0.62	0.891812	-0.694005	0.49	0.91	188.614	285.62
mrpl16|NM_001007764	237.464	-0.62	0.891812	-0.694005	0.49	0.91	188.614	285.62
mrpl39|NM_199915	149.856	-0.96	1.06891	-0.894	0.37	0.91	102.682	196.364
jam2a|NM_001098264	20.2163	4.82	3.08078	1.5644	0.12	0.91	39.325	1.37317
atp5j|NM_213307	521.075	-0.98	0.764224	-1.28134	0.2	0.91	353.196	686.587
atp5j|XM_005167990	505.889	-1.11	0.785603	-1.41282	0.16	0.91	322.61	686.587
atp5j|XM_017352984	505.889	-1.11	0.785603	-1.41282	0.16	0.91	322.61	686.587
atp5j|XM_017352970	380.868	-1.06	0.827016	-1.2776	0.2	0.91	249.058	510.821
appa|NM_131564	246.972	-0.61	0.880597	-0.696531	0.49	0.91	196.625	296.605
cyyr1|NM_212882	140.404	0.07	1.04672	0.0687651	0.95	0.99	144.92	135.944
adamts1|XM_688443	62.241	0.06	1.46142	0.0442803	0.96	0.99	64.0851	60.4196
n6amt1|NM_001002502	16.1121	1.87	2.80142	0.668254	0.5	0.91	25.4884	6.86587
LOC108179018|XM_017355951	119.889	-0.31	1.11696	-0.278253	0.78	0.96	107.78	131.825
atp1a1a.1|NM_131686	323.816	-1.17	0.873447	-1.33565	0.18	0.91	200.994	444.908
atp1a1a.2|NM_131687	8.67772	6.09	4.60616	1.32262	0.19	0.91	17.4778	0
atp1a1a.5|NM_178099	6.41314	1.06	4.17885	0.254785	0.8	0.97	8.73888	4.11952
mbnl2|XM_005168297	68.8064	-0.91	1.43179	-0.637846	0.52	0.92	48.0638	89.2563
mbnl2|XM_009305354	68.8064	-0.91	1.43179	-0.637846	0.52	0.92	48.0638	89.2563
mbnl2|XM_009305355	45.8435	-1.39	1.73432	-0.802022	0.42	0.91	25.4884	65.9123
mbnl2|XM_009305356	68.8064	-0.91	1.43179	-0.637846	0.52	0.92	48.0638	89.2563
mbnl2|XM_009305373	45.8435	-1.39	1.73432	-0.802022	0.42	0.91	25.4884	65.9123
mbnl2|NM_001099998	21.3581	-1.31	2.40632	-0.543254	0.59	0.93	12.3801	30.2098
mbnl2|NM_001161669	21.3581	-1.31	2.40632	-0.543254	0.59	0.93	12.3801	30.2098
mbnl2|NM_001161670	21.3581	-1.31	2.40632	-0.543254	0.59	0.93	12.3801	30.2098
mbnl2|NM_001161671	21.3581	-1.31	2.40632	-0.543254	0.59	0.93	12.3801	30.2098
mbnl2|XM_005168298	68.8064	-0.91	1.43179	-0.637846	0.52	0.92	48.0638	89.2563
mbnl2|XM_005168296	68.8064	-0.91	1.43179	-0.637846	0.52	0.92	48.0638	89.2563
mbnl2|XM_005168300	68.8064	-0.91	1.43179	-0.637846	0.52	0.92	48.0638	89.2563
kpnb3|NM_001145604	17.6536	3.56	2.93831	1.2104	0.23	0.91	32.7708	2.74635
kpnb3|XM_009305394	187.77	0.8	0.97962	0.818352	0.41	0.91	240.319	135.944
farp1|XM_017355952	4.33886	5.09	5.91692	0.860607	0.39	0.91	8.73888	0
ggact.2|NM_001004544	7.52957	2.15	3.98464	0.54011	0.59	0.93	12.3801	2.74635
slitrk6|NM_001305553	9.76243	6.26	4.43464	1.4121	0.16	0.91	19.6625	0
spry2|XM_005160285	68.8318	1.21	1.46253	0.829453	0.41	0.91	96.8559	41.1952
spry2|NM_001003842	68.8318	1.21	1.46253	0.829453	0.41	0.91	96.8559	41.1952
ndfip2|NM_213347	93.0888	-0.82	1.26208	-0.651618	0.51	0.91	67.7263	118.093
tuba8l2|NM_200691	797.868	-1.05	0.720249	-1.46469	0.14	0.91	522.148	1069.7
stk16|NM_001017630	43.8643	-0.97	1.73494	-0.559126	0.58	0.93	29.8578	57.6733
atic|NM_001082796	141.451	1.07	1.1053	0.968211	0.33	0.91	192.984	90.6294
fn1b|XM_009305554	117.72	-0.37	1.127	-0.328752	0.74	0.95	103.41	131.825
fn1b|NM_001013261	117.72	-0.37	1.127	-0.328752	0.74	0.95	103.41	131.825
fn1b|XM_005160284	117.72	-0.37	1.127	-0.328752	0.74	0.95	103.41	131.825
nrp2a|NM_212965	86.7137	0.17	1.2706	0.134387	0.89	0.99	92.4865	81.0172
cnppd1|NM_199928	147.286	-0.09	1.02778	-0.0920411	0.93	0.99	143.463	151.049
prkag3a|XM_005160292	54.1469	0.16	1.55425	0.102326	0.92	0.99	57.531	50.8074
prkag3a|XM_017355956	14.336	2.06	2.97226	0.694657	0.49	0.91	23.3037	5.49269
prkag3a|XM_687502	53.7853	0.14	1.55854	0.0902517	0.93	0.99	56.8027	50.8074
prkag3a|XM_005160293	54.1469	0.16	1.55425	0.102326	0.92	0.99	57.531	50.8074
fastkd2|XM_687718	73.2912	0.22	1.36468	0.159881	0.87	0.98	79.3782	67.2855
gtf3c3|NM_001256242	32.9093	-1.32	1.99039	-0.664343	0.51	0.91	18.9342	46.6879
gtf3c3|XM_009305611	32.9093	-1.32	1.99039	-0.664343	0.51	0.91	18.9342	46.6879
klf7a|NM_001020643	9.76243	6.26	4.43464	1.4121	0.16	0.91	19.6625	0
si:ch211-93g23.2|NM_001145627	13.8285	-7.7	4.07161	-1.89109	0.059	0.91	0	27.4635
ube2f|XM_005160296	117.213	-0.96	1.16696	-0.823751	0.41	0.91	80.1064	153.795
ube2f|XM_009305690	117.574	-0.95	1.16449	-0.814283	0.42	0.91	80.8347	153.795
ube2f|NM_213314	175.552	-0.89	1.00756	-0.885526	0.38	0.91	123.801	226.574
lancl1|NM_001009891	23.6417	1.96	2.37697	0.823648	0.41	0.91	37.8685	9.61221
mylz3|NM_131619	1856.88	-1.04	0.654884	-1.58488	0.11	0.91	1224.9	2479.95
pcnp|NM_001326716	218.44	-1.09	0.961134	-1.13514	0.26	0.91	140.55	295.232
pcnp|NM_001326717	211.526	-1.02	0.962774	-1.06184	0.29	0.91	140.55	281.501
pcnp|NM_001326718	211.526	-1.02	0.962774	-1.06184	0.29	0.91	140.55	281.501
pcnp|NM_001006035	216.366	-1.07	0.961526	-1.1136	0.27	0.91	140.55	291.113
pcnp|NM_001326719	218.44	-1.09	0.961134	-1.13514	0.26	0.91	140.55	295.232
pcnp|XM_005170856	218.44	-1.09	0.961134	-1.13514	0.26	0.91	140.55	295.232
pcnp|XM_017354608	241.948	-1.3	0.95913	-1.35835	0.17	0.91	140.55	341.92
arglu1b|NM_200162	35.7575	0.21	1.87127	0.110979	0.91	0.99	38.5967	32.9562
eng1b|XM_009305884	22.8868	1.65	2.37869	0.693519	0.49	0.91	34.9555	10.9854
eng1b|NM_001013498	22.1954	1.84	2.43027	0.758069	0.45	0.91	34.9555	9.61221
wu:fc47e11|NR_120315	83.2947	-1.38	1.3675	-1.00785	0.31	0.91	46.6074	119.466
LOC100535611|XM_017355871	4.33886	5.09	5.91692	0.860607	0.39	0.91	8.73888	0
si:dkeyp-9d4.3|XM_009306153	3.97729	4.97	6.12192	0.811282	0.42	0.91	8.01064	0
si:dkeyp-9d4.3|XM_009306160	3.97729	4.97	6.12192	0.811282	0.42	0.91	8.01064	0
si:dkeyp-9d4.5|XM_017355957	6.115	2.97	4.52358	0.656901	0.51	0.91	10.9236	1.37317
LOC101882918|XM_005170874	14.0696	4.27	3.407	1.25451	0.21	0.91	26.9449	1.37317
syngr3b|NM_001320491	6.50829	5.68	5.08331	1.11682	0.26	0.91	13.1083	0
alkbh5|NM_001077387	52.6753	-4.11	1.97822	-2.07519	0.038	0.91	5.82592	98.8685
smcr8b|NM_214802	11.7733	1.27	3.1696	0.399527	0.69	0.94	16.7495	6.86587
zgc:112980|NM_001013300	42.5132	-0.79	1.74846	-0.454355	0.65	0.94	31.3143	53.5538
ptcd1|XM_693706	59.2153	2.36	1.68528	1.39762	0.16	0.91	99.7689	19.2244
si:ch211-160d14.9|XR_662945	13.6573	-1.28	2.94239	-0.436104	0.66	0.94	8.01064	19.2244
si:ch211-160d14.9|XR_662946	13.6573	-1.28	2.94239	-0.436104	0.66	0.94	8.01064	19.2244
zgc:153118|XM_005170875	33.3217	0.37	1.93599	0.192582	0.85	0.98	37.8685	28.8366
fbxl18|NM_001030245	38.1807	1.29	1.87595	0.689531	0.49	0.91	54.618	21.9708
actb1|NM_131031	1370.97	-0.76	0.63511	-1.19337	0.23	0.91	1026.09	1710.97
zgc:77849|NM_199602	342.928	-0.37	0.784309	-0.477588	0.63	0.93	300.763	384.489
LOC101883595|XR_224697	35.5038	-0.73	1.88979	-0.384079	0.7	0.94	26.9449	43.9415
ndufab1a|NM_001003418	500.218	-1.02	0.776154	-1.31964	0.19	0.91	332.078	665.989
zgc:152698|NM_001079934	3.61571	4.83	6.36052	0.759229	0.45	0.91	7.2824	0
plk1|NM_001003890	226.8	-0.07	0.880843	-0.07972	0.94	0.99	222.841	230.693
chtf18|NM_001110102	6.86986	5.76	4.98696	1.15404	0.25	0.91	13.8366	0
uncx4.1|NM_001020780	18.8017	7.21	3.6922	1.95215	0.051	0.91	37.8685	0
micall2b|NR_132439	8.31614	6.03	4.6714	1.29101	0.2	0.91	16.7495	0
micall2b|NM_001312897	8.31614	6.03	4.6714	1.29101	0.2	0.91	16.7495	0
micall2b|XM_017354911	8.31614	6.03	4.6714	1.29101	0.2	0.91	16.7495	0
micall2b|XR_001798158	8.31614	6.03	4.6714	1.29101	0.2	0.91	16.7495	0
ugt5b2|NM_001177499	19.7913	3.09	2.72149	1.13704	0.26	0.91	35.6838	4.11952
ugt5b1|XM_005170846	13.9871	-1.52	2.9255	-0.519646	0.6	0.93	7.2824	20.5976
ugt5b1|XM_009305726	13.9871	-1.52	2.9255	-0.519646	0.6	0.93	7.2824	20.5976
ugt5b1|NM_001177493	4.93513	-0.35	4.67795	-0.0748825	0.94	0.99	4.36944	5.49269
mad1l1|NM_200912	4.70043	5.21	5.73453	0.908119	0.36	0.91	9.46712	0
pmm2|NM_200084	53.8171	0.22	1.55949	0.138965	0.89	0.99	58.2592	49.4342
zgc:56409|XM_005170851	16.0297	-2.18	2.80665	-0.777863	0.44	0.91	5.82592	26.0903
zgc:56409|NM_200325	16.0297	-2.18	2.80665	-0.777863	0.44	0.91	5.82592	26.0903
pdia2|XM_009305842	7.60569	-6.84	4.88274	-1.40028	0.16	0.91	0	15.1049
pdia2|NM_001320534	7.60569	-6.84	4.88274	-1.40028	0.16	0.91	0	15.1049
rnf175|NM_001328343	105.737	-1.31	1.24639	-1.05196	0.29	0.91	61.1722	149.676
rnf175|NM_200308	105.737	-1.31	1.24639	-1.05196	0.29	0.91	61.1722	149.676
fgb|NM_212774	16.9621	4.56	3.22829	1.41143	0.16	0.91	32.7708	1.37317
fga|NM_001194989	21.2503	0.26	2.37433	0.108393	0.91	0.99	23.3037	19.2244
lratb|XM_009306315	15.1035	-0.84	2.7896	-0.29959	0.76	0.96	10.9236	19.2244
lratb|XM_001921155	8.28443	3.46	4.04769	0.85406	0.39	0.91	15.293	1.37317
eif3f|NM_001200009	617.85	-0.75	0.713349	-1.05736	0.29	0.91	463.161	770.35
zgc:77880|NM_200891	8.67772	6.09	4.60616	1.32262	0.19	0.91	17.4778	0
dachb|XM_009305776	5.75343	2.87	4.63005	0.620296	0.54	0.92	10.1954	1.37317
dachb|XM_017356588	5.75343	2.87	4.63005	0.620296	0.54	0.92	10.1954	1.37317
dachb|NM_152956	5.75343	2.87	4.63005	0.620296	0.54	0.92	10.1954	1.37317
atp1b1b|NM_131671	6.86986	5.76	4.98696	1.15404	0.25	0.91	13.8366	0
dmd|NM_001326687	24.3331	1.77	2.32724	0.758473	0.45	0.91	37.8685	10.9854
dmd|NM_131785	20.0577	1.94	2.55055	0.760297	0.45	0.91	32.0426	8.23904
dmd|XM_009306074	20.0577	1.94	2.55055	0.760297	0.45	0.91	32.0426	8.23904
dmd|XM_009306076	20.0577	1.94	2.55055	0.760297	0.45	0.91	32.0426	8.23904
dmd|XM_017355861	20.7491	1.72	2.49009	0.689447	0.49	0.91	32.0426	9.61221
dmd|XM_017355862	20.7491	1.72	2.49009	0.689447	0.49	0.91	32.0426	9.61221
dmd|XM_017355863	20.7491	1.72	2.49009	0.689447	0.49	0.91	32.0426	9.61221
dmd|XM_017355864	20.7491	1.72	2.49009	0.689447	0.49	0.91	32.0426	9.61221
dmd|XM_017355865	20.7491	1.72	2.49009	0.689447	0.49	0.91	32.0426	9.61221
dmd|XR_001799156	20.7491	1.72	2.49009	0.689447	0.49	0.91	32.0426	9.61221
casc5|XM_001921844	50.8547	4.12	2.05357	2.00625	0.045	0.91	96.8559	5.49269
casc5|XM_009306360	50.8547	4.12	2.05357	2.00625	0.045	0.91	96.8559	5.49269
knstrn|NM_001128774	112.144	0.11	1.1432	0.0964177	0.92	0.99	117.247	107.108
iqce|NM_001287204	3.61571	4.83	6.36052	0.759229	0.45	0.91	7.2824	0
iqce|XM_002660380	3.61571	4.83	6.36052	0.759229	0.45	0.91	7.2824	0
grk4|NM_001079986	18.0469	4.65	3.17412	1.46486	0.14	0.91	34.9555	1.37317
tspan5b|NM_001008591	29.6489	7.86	3.3462	2.35038	0.019	0.91	59.7157	0
saraf|XM_005159818	6.44485	1.87	4.24318	0.441188	0.66	0.94	10.1954	2.74635
saraf|NM_001076589	5.36014	1.52	4.58136	0.332679	0.74	0.95	8.01064	2.74635
cplx2l|NM_001002459	22.1637	1.59	2.40666	0.659946	0.51	0.91	33.499	10.9854
gne|NM_200883	66.2818	0.36	1.42849	0.25124	0.8	0.97	75.0087	57.6733
nansa|NM_206829	157.315	0.02	1.00245	0.0192702	0.98	1	159.485	155.169
clta|XM_005159805	319.775	-0.48	0.806103	-0.589717	0.56	0.93	269.449	369.384
clta|XM_005159806	319.775	-0.48	0.806103	-0.589717	0.56	0.93	269.449	369.384
clta|NM_213045	319.775	-0.48	0.806103	-0.589717	0.56	0.93	269.449	369.384
sclt1|XM_005159812	8.31614	6.03	4.6714	1.29101	0.2	0.91	16.7495	0
sclt1|XM_005159813	8.31614	6.03	4.6714	1.29101	0.2	0.91	16.7495	0
zgc:77739|XM_005159803	174.874	-1.17	1.03742	-1.12523	0.26	0.91	108.508	240.305
zgc:77739|XM_005159804	174.874	-1.17	1.03742	-1.12523	0.26	0.91	108.508	240.305
zgc:77739|NM_200896	174.874	-1.17	1.03742	-1.12523	0.26	0.91	108.508	240.305
pcdh10a|XM_009306587	45.5517	0.9	1.70929	0.525774	0.6	0.93	59.7157	31.583
pcdh10a|XM_009306589	28.5768	1.46	2.14218	0.683069	0.49	0.91	42.2379	15.1049
pcdh10a|NM_212571	44.4352	0.75	1.71828	0.434467	0.66	0.94	56.0745	32.9562
pcdh18a|XM_005159845	88.5089	0.74	1.28535	0.573488	0.57	0.93	111.421	65.9123
pcdh18a|XM_005159846	88.5089	0.74	1.28535	0.573488	0.57	0.93	111.421	65.9123
pcdh18a|XM_005159847	88.5089	0.74	1.28535	0.573488	0.57	0.93	111.421	65.9123
pcdh18a|NM_001115058	88.5089	0.74	1.28535	0.573488	0.57	0.93	111.421	65.9123
pcdh18a|XR_222598	16.1756	2.77	2.91002	0.95021	0.34	0.91	28.4014	4.11952
pcdh18a|XR_222599	7.23143	5.83	4.89849	1.18999	0.23	0.91	14.5648	0
noctb|XM_692334	145.396	-0.52	1.04714	-0.499612	0.62	0.93	120.16	170.274
noctb|XM_009306789	145.396	-0.52	1.04714	-0.499612	0.62	0.93	120.16	170.274
elf2b|NM_199219	185.169	-1.06	1.00724	-1.05247	0.29	0.91	120.888	248.544
elf2b|XM_005159828	185.531	-1.05	1.00578	-1.04539	0.3	0.91	121.616	248.544
elf2b|XM_005159829	185.531	-1.05	1.00578	-1.04539	0.3	0.91	121.616	248.544
elf2b|XM_005159830	185.531	-1.05	1.00578	-1.04539	0.3	0.91	121.616	248.544
mgarp|XM_003197634	4.33886	5.09	5.91692	0.860607	0.39	0.91	8.73888	0
mgarp|XM_005159849	4.33886	5.09	5.91692	0.860607	0.39	0.91	8.73888	0
zgc:101819|NM_001005769	29.2239	4.33	2.55109	1.69789	0.09	0.91	56.0745	2.74635
ank2a|XM_017355969	57.8895	0.62	1.52563	0.40654	0.68	0.94	70.6393	45.3147
camk2d2|XM_005159836	127.115	0.97	1.13799	0.856507	0.39	0.91	169.68	85.1368
camk2d2|XM_009306661	127.115	0.97	1.13799	0.856507	0.39	0.91	169.68	85.1368
camk2d2|XM_009306662	127.115	0.97	1.13799	0.856507	0.39	0.91	169.68	85.1368
camk2d2|XM_009306663	127.115	0.97	1.13799	0.856507	0.39	0.91	169.68	85.1368
camk2d2|XM_009306665	127.115	0.97	1.13799	0.856507	0.39	0.91	169.68	85.1368
camk2d2|XM_009306667	127.115	0.97	1.13799	0.856507	0.39	0.91	169.68	85.1368
camk2d2|XM_009306669	127.115	0.97	1.13799	0.856507	0.39	0.91	169.68	85.1368
camk2d2|XM_017354018	127.115	0.97	1.13799	0.856507	0.39	0.91	169.68	85.1368
camk2d2|XM_017354084	127.115	0.97	1.13799	0.856507	0.39	0.91	169.68	85.1368
camk2d2|NM_001002542	26.8641	1.95	2.24927	0.865767	0.39	0.91	42.9662	10.9854
camk2d2|XM_009306657	7.593	5.9	4.81693	1.22475	0.22	0.91	15.293	0
cxcl8a|XM_001342570	19.1252	-2.71	2.65654	-1.0212	0.31	0.91	5.09768	32.9562
cxcl8a|XM_009306855	19.1252	-2.71	2.65654	-1.0212	0.31	0.91	5.09768	32.9562
wfs1a|XM_690160	15.186	6.9	3.89841	1.76985	0.077	0.91	30.5861	0
LOC567498|XM_005159850	6.86986	5.76	4.98696	1.15404	0.25	0.91	13.8366	0
fip1l1b|XM_009306690	55.8787	0.92	1.56742	0.584123	0.56	0.93	73.5523	38.4489
fip1l1b|XM_009306697	55.8787	0.92	1.56742	0.584123	0.56	0.93	73.5523	38.4489
fip1l1b|NM_001006042	55.5171	0.9	1.5707	0.573765	0.57	0.93	72.824	38.4489
LOC553528|XM_009306884	7.23143	5.83	4.89849	1.18999	0.23	0.91	14.5648	0
chic2|NM_201120	108.668	-0.24	1.15917	-0.203728	0.84	0.97	100.497	116.72
LOC553528|NM_001328067	21.7831	-0.8	2.35822	-0.338295	0.74	0.95	16.0213	27.4635
LOC553528|NM_001328068	6.86986	5.76	4.98696	1.15404	0.25	0.91	13.8366	0
rbpja|NM_198878	57.7563	4.75	2.08541	2.27606	0.023	0.91	112.149	4.11952
rbpja|XM_017359002	57.7563	4.75	2.08541	2.27606	0.023	0.91	112.149	4.11952
stim2a|XM_002660408	10.8471	6.41	4.29199	1.49445	0.14	0.91	21.8472	0
si:dkey-194g4.1|XM_005159852	7.95457	5.97	4.74146	1.2584	0.21	0.91	16.0213	0
si:dkey-194g4.1|XM_017355970	7.95457	5.97	4.74146	1.2584	0.21	0.91	16.0213	0
LOC100004978|XM_005159853	32.7698	-0.4	1.94797	-0.207789	0.84	0.97	28.4014	37.0757
LOC100004978|XM_005159854	32.0467	-0.48	1.96962	-0.244066	0.81	0.97	26.9449	37.0757
LOC100004978|XM_009306944	32.7698	-0.4	1.94797	-0.207789	0.84	0.97	28.4014	37.0757
LOC100004978|XM_017355971	32.0467	-0.48	1.96962	-0.244066	0.81	0.97	26.9449	37.0757
LOC100330143|XM_009306897	5.78514	5.51	5.30463	1.03819	0.3	0.91	11.6518	0
LOC100330143|XM_002667229	5.78514	5.51	5.30463	1.03819	0.3	0.91	11.6518	0
LOC100330143|XM_005174652	5.78514	5.51	5.30463	1.03819	0.3	0.91	11.6518	0
LOC100330143|XM_005174654	5.78514	5.51	5.30463	1.03819	0.3	0.91	11.6518	0
LOC100330143|XM_005174653	5.78514	5.51	5.30463	1.03819	0.3	0.91	11.6518	0
pcdh7a|XM_005159857	15.592	0.33	2.74102	0.119573	0.9	0.99	17.4778	13.7317
pi4k2b|NM_001045485	43.0778	-1.27	1.76959	-0.715097	0.47	0.91	25.4884	60.4196
dlc1|XM_001921739	31.628	2.73	2.19838	1.24076	0.21	0.91	55.3463	8.23904
dlc1|XM_005159860	31.628	2.73	2.19838	1.24076	0.21	0.91	55.3463	8.23904
dlc1|XM_017355991	31.628	2.73	2.19838	1.24076	0.21	0.91	55.3463	8.23904
dlc1|XM_017355992	31.628	2.73	2.19838	1.24076	0.21	0.91	55.3463	8.23904
tusc3|NM_001020560	123.315	-0.42	1.10881	-0.376882	0.71	0.95	106.323	140.064
LOC794952|XR_663237	29.1097	0.56	2.065	0.272257	0.79	0.96	34.9555	23.3439
vps37a|NM_199990	94.7571	-0.44	1.23163	-0.361028	0.72	0.95	80.8347	108.481
mtmr7b|XR_001798159	35.5228	0.65	1.89178	0.343419	0.73	0.95	43.6944	27.4635
mtmr7b|XM_005168352	35.5228	0.65	1.89178	0.343419	0.73	0.95	43.6944	27.4635
mtus1b|XM_001919934	41.8662	-1.94	1.85339	-1.04418	0.3	0.91	17.4778	65.9123
mtus1b|XM_017355994	41.8662	-1.94	1.85339	-1.04418	0.3	0.91	17.4778	65.9123
mtus1b|XM_005168364	42.5893	-1.82	1.82871	-0.995131	0.32	0.91	18.9342	65.9123
mtus1b|XM_017355995	41.8662	-1.94	1.85339	-1.04418	0.3	0.91	17.4778	65.9123
mtus1b|XM_005168365	39.6967	-2.35	1.93877	-1.21227	0.23	0.91	13.1083	65.9123
pcm1|XM_009307141	60.6108	1.17	1.53537	0.7606	0.45	0.91	84.4759	37.0757
pcm1|XM_009307142	60.6108	1.17	1.53537	0.7606	0.45	0.91	84.4759	37.0757
pcm1|XM_009307146	60.6108	1.17	1.53537	0.7606	0.45	0.91	84.4759	37.0757
pcm1|XM_009307147	60.6108	1.17	1.53537	0.7606	0.45	0.91	84.4759	37.0757
pcm1|XM_009307151	60.6108	1.17	1.53537	0.7606	0.45	0.91	84.4759	37.0757
pcm1|XM_009307153	60.6108	1.17	1.53537	0.7606	0.45	0.91	84.4759	37.0757
pcm1|XM_009307156	60.6108	1.17	1.53537	0.7606	0.45	0.91	84.4759	37.0757
pcm1|NM_001115123	60.6108	1.17	1.53537	0.7606	0.45	0.91	84.4759	37.0757
asah1b|NM_200577	49.973	2.81	1.85754	1.51471	0.13	0.91	88.1171	12.3586
frg1|XR_001797984	30.5116	2.41	2.18684	1.10072	0.27	0.91	51.705	9.61221
frg1|XM_017354774	30.5116	2.41	2.18684	1.10072	0.27	0.91	51.705	9.61221
frg1|NM_001017793	25.1514	2.65	2.40093	1.1036	0.27	0.91	43.6944	6.86587
casp3a|XM_017356440	91.6362	0.63	1.26072	0.500553	0.62	0.93	112.149	71.405
casp3a|NM_131877	91.6362	0.63	1.26072	0.500553	0.62	0.93	112.149	71.405
acsl1a|XM_005168349	107.101	0.43	1.17404	0.366007	0.71	0.95	123.801	90.6294
acsl1a|XM_005168350	107.101	0.43	1.17404	0.366007	0.71	0.95	123.801	90.6294
acsl1a|NM_001031837	11.9445	-0.81	3.10694	-0.260621	0.79	0.97	8.73888	15.1049
helt|NM_207065	25.6081	4.13	2.63911	1.56521	0.12	0.91	48.7921	2.74635
si:ch211-197n1.2|XM_005168366	4.30714	2.39	5.19143	0.459714	0.65	0.94	7.2824	1.37317
si:ch211-197n1.2|XM_692079	4.30714	2.39	5.19143	0.459714	0.65	0.94	7.2824	1.37317
slc25a4|XM_017357970	1746.43	-0.95	0.645106	-1.46738	0.14	0.91	1201.6	2283.59
slc25a4|NM_214702	1745.74	-0.95	0.645007	-1.46626	0.14	0.91	1201.6	2282.21
cfap97|XM_005168338	16.1756	2.77	2.91002	0.95021	0.34	0.91	28.4014	4.11952
cfap97|NM_212778	16.1756	2.77	2.91002	0.95021	0.34	0.91	28.4014	4.11952
ufsp2|NM_198810	111.58	0.28	1.14923	0.239956	0.81	0.97	123.073	100.242
ufsp2|XM_005168337	110.888	0.3	1.15271	0.256495	0.8	0.97	123.073	98.8685
si:dkey-192k22.2|XM_001334757	17.8058	-1.8	2.6465	-0.679297	0.5	0.91	8.01064	27.4635
si:dkey-192k22.2|XM_009307516	17.8058	-1.8	2.6465	-0.679297	0.5	0.91	8.01064	27.4635
fam114a1|XM_009307313	6.86986	5.76	4.98696	1.15404	0.25	0.91	13.8366	0
fam114a1|NM_001089478	6.50829	5.68	5.08331	1.11682	0.26	0.91	13.1083	0
klf3|XM_017356404	27.1432	-0.35	2.12085	-0.165178	0.87	0.98	24.0319	30.2098
klf3|NM_131859	27.1432	-0.35	2.12085	-0.165178	0.87	0.98	24.0319	30.2098
tbc1d1|XM_005168369	8.67772	6.09	4.60616	1.32262	0.19	0.91	17.4778	0
tbc1d1|XM_005168371	7.23143	5.83	4.89849	1.18999	0.23	0.91	14.5648	0
tbc1d1|XM_009307533	7.23143	5.83	4.89849	1.18999	0.23	0.91	14.5648	0
tbc1d1|XM_017356001	7.23143	5.83	4.89849	1.18999	0.23	0.91	14.5648	0
tbc1d1|XM_684525	5.42357	5.41	5.43262	0.99659	0.32	0.91	10.9236	0
pgm2|NM_212886	323.93	-0.22	0.790315	-0.277211	0.78	0.96	301.491	346.04
si:dkey-167i21.2|NR_015622	5.32842	0.65	4.53281	0.143327	0.89	0.98	6.55416	4.11952
zgc:195282|XM_005168323	3.94557	2.23	5.38012	0.415339	0.68	0.94	6.55416	1.37317
zgc:195282|XM_009307111	3.94557	2.23	5.38012	0.415339	0.68	0.94	6.55416	1.37317
rnf38|XM_690108	107.621	0.63	1.18316	0.535701	0.59	0.93	131.811	83.7636
limch1a|XM_017355097	3.61571	4.83	6.36052	0.759229	0.45	0.91	7.2824	0
limch1a|XM_017355098	3.61571	4.83	6.36052	0.759229	0.45	0.91	7.2824	0
limch1a|XM_017355096	3.61571	4.83	6.36052	0.759229	0.45	0.91	7.2824	0
limch1a|XM_017355100	3.61571	4.83	6.36052	0.759229	0.45	0.91	7.2824	0
limch1a|XM_005168356	3.61571	4.83	6.36052	0.759229	0.45	0.91	7.2824	0
limch1a|XM_005168358	3.61571	4.83	6.36052	0.759229	0.45	0.91	7.2824	0
limch1a|NM_001145577	3.61571	4.83	6.36052	0.759229	0.45	0.91	7.2824	0
exosc9|NM_001006077	33.512	1.16	1.9736	0.586655	0.56	0.93	46.6074	20.5976
tyrp1b|NM_001002749	3.94557	2.23	5.38012	0.415339	0.68	0.94	6.55416	1.37317
rbm47|NM_001114686	16.8987	2.84	2.86686	0.989682	0.32	0.91	29.8578	4.11952
rbm47|XM_005168359	16.8987	2.84	2.86686	0.989682	0.32	0.91	29.8578	4.11952
rbm47|XM_005168360	16.8987	2.84	2.86686	0.989682	0.32	0.91	29.8578	4.11952
rbm47|XM_005168361	16.8987	2.84	2.86686	0.989682	0.32	0.91	29.8578	4.11952
rbm47|XM_009307327	16.8987	2.84	2.86686	0.989682	0.32	0.91	29.8578	4.11952
lap3|NM_001114847	37.115	3.63	2.20502	1.64831	0.099	0.91	69.1828	5.49269
clrn2|NM_001114690	6.83814	3.15	4.33812	0.726609	0.47	0.91	12.3801	1.37317
smc2|NM_199542	53.1764	1.32	1.63427	0.807408	0.42	0.91	76.4652	30.2098
kiaa0368|XM_009307347	45.2218	0.98	1.72037	0.569829	0.57	0.93	60.4439	30.2098
kiaa0368|NM_001162486	45.2218	0.98	1.72037	0.569829	0.57	0.93	60.4439	30.2098
polr1e|NM_001020704	52.9924	3.84	1.97741	1.94234	0.052	0.91	99.7689	6.86587
tmem192|NM_001102393	27.0861	5.25	2.87267	1.82913	0.067	0.91	53.1615	1.37317
tma16|NM_001177745	108.459	-0.94	1.19876	-0.780212	0.44	0.91	75.0087	141.437
si:dkey-82j4.2|XM_690663	27.8664	-0.27	2.09432	-0.126738	0.9	0.99	25.4884	30.2098
apbb2b|XM_005168376	12.655	6.64	4.10048	1.61848	0.11	0.91	25.4884	0
apbb2b|XM_009307588	12.655	6.64	4.10048	1.61848	0.11	0.91	25.4884	0
apbb2b|XM_017356028	12.655	6.64	4.10048	1.61848	0.11	0.91	25.4884	0
apbb2b|XM_688300	12.655	6.64	4.10048	1.61848	0.11	0.91	25.4884	0
apbb2b|XM_009307598	12.2934	6.59	4.135	1.59486	0.11	0.91	24.7602	0
apbb2b|XM_005168377	12.2934	6.59	4.135	1.59486	0.11	0.91	24.7602	0
mettl14|NM_207071	92.3213	-0.4	1.24307	-0.323277	0.75	0.95	80.1064	104.361
ndst3|XM_009307604	6.14672	5.59	5.18873	1.07824	0.28	0.91	12.3801	0
ugt8|NM_001044325	26.7499	-0.55	2.13973	-0.257954	0.8	0.97	21.8472	31.583
spock3|NM_001327987	61.2895	-2.34	1.64682	-1.41933	0.16	0.91	20.3907	101.615
spock3|NM_001327988	61.2895	-2.34	1.64682	-1.41933	0.16	0.91	20.3907	101.615
spock3|XM_009307619	61.2895	-2.34	1.64682	-1.41933	0.16	0.91	20.3907	101.615
spock3|XM_017355108	61.2895	-2.34	1.64682	-1.41933	0.16	0.91	20.3907	101.615
cpe|XM_017353607	71.8322	0.79	1.40327	0.565866	0.57	0.93	91.7583	52.1806
cpe|NM_214810	71.8322	0.79	1.40327	0.565866	0.57	0.93	91.7583	52.1806
klhl2|XM_691277	46.0972	-0.58	1.67813	-0.348475	0.73	0.95	37.1402	54.9269
si:dkey-253i9.4|XM_005170930	50.7976	-0.26	1.59868	-0.160892	0.87	0.98	46.6074	54.9269
si:dkey-253i9.4|XM_005170931	50.7976	-0.26	1.59868	-0.160892	0.87	0.98	46.6074	54.9269
si:dkey-253i9.4|XM_005170932	50.7976	-0.26	1.59868	-0.160892	0.87	0.98	46.6074	54.9269
si:dkey-253i9.4|XM_009291106	50.7976	-0.26	1.59868	-0.160892	0.87	0.98	46.6074	54.9269
si:dkey-253i9.4|XM_009291107	50.7976	-0.26	1.59868	-0.160892	0.87	0.98	46.6074	54.9269
med28|NM_001007770	144.134	-1.06	1.09393	-0.972282	0.33	0.91	93.943	193.617
tmem144a|NM_001003999	3.61571	4.83	6.36052	0.759229	0.45	0.91	7.2824	0
gria2a|XM_005170896	13.5494	1.18	2.96616	0.397884	0.69	0.94	18.9342	8.23904
gria2a|XM_005170897	13.5494	1.18	2.96616	0.397884	0.69	0.94	18.9342	8.23904
gria2a|XM_005170898	13.5494	1.18	2.96616	0.397884	0.69	0.94	18.9342	8.23904
wdr19|XM_005170934	8.97585	2.46	3.72036	0.660419	0.51	0.91	15.293	2.74635
wdr19|XM_009291110	8.97585	2.46	3.72036	0.660419	0.51	0.91	15.293	2.74635
wdr19|XM_017356042	7.89114	2.23	3.91131	0.57132	0.57	0.93	13.1083	2.74635
ncapd3|NM_200330	20.876	3.18	2.67597	1.18842	0.23	0.91	37.8685	4.11952
primpol|NM_001037378	32.3511	2.77	2.18402	1.26608	0.21	0.91	56.8027	8.23904
zcchc7|NM_001301358	30.7019	5.44	2.79595	1.94557	0.052	0.91	60.4439	1.37317
zcchc7|XM_009307728	30.7019	5.44	2.79595	1.94557	0.052	0.91	60.4439	1.37317
pax5|XM_005170922	4.70043	5.21	5.73453	0.908119	0.36	0.91	9.46712	0
pax5|XM_005170923	4.70043	5.21	5.73453	0.908119	0.36	0.91	9.46712	0
melk|NM_206888	43.4837	-2.6	1.90264	-1.36794	0.17	0.91	12.3801	74.1514
kdm4c|NM_001083851	11.2087	6.46	4.24958	1.52049	0.13	0.91	22.5754	0
chrnb3a|NM_201220	15.9091	6.97	3.85081	1.80915	0.07	0.91	32.0426	0
uchl1|NM_201477	30.3783	-1.77	2.09847	-0.845764	0.4	0.91	13.8366	46.6879
anxa5b|NM_181757	159.478	-0.52	1.01254	-0.516429	0.61	0.93	131.811	186.752
fgfbp1b|XM_005170938	19.4614	3.71	2.85206	1.3003	0.19	0.91	36.412	2.74635
fgfbp2b|XM_005170895	14.2218	-3.6	3.13087	-1.14927	0.25	0.91	2.18472	26.0903
fgfbp2b|NM_001089526	14.2218	-3.6	3.13087	-1.14927	0.25	0.91	2.18472	26.0903
tapt1|NM_001123250	17.5394	-1.02	2.61308	-0.391391	0.7	0.94	11.6518	23.3439
ldb2b|NM_131315	31.0951	7.93	3.31639	2.39223	0.017	0.91	62.6287	0
qdprb1|NM_001020698	72.4792	1.39	1.45022	0.956159	0.34	0.91	105.595	39.822
gtf2e2|NM_212731	136.883	0.09	1.0571	0.0823738	0.93	0.99	142.007	131.825
si:dkey-92j12.6|NM_001303054	20.0514	-8.24	3.71014	-2.21981	0.026	0.91	0	39.822
adgrl3.1|XM_005170940	29.6615	1.54	2.11447	0.726429	0.47	0.91	44.4226	15.1049
adgrl3.1|XM_005170941	29.6615	1.54	2.11447	0.726429	0.47	0.91	44.4226	15.1049
adgrl3.1|XM_005170942	29.6615	1.54	2.11447	0.726429	0.47	0.91	44.4226	15.1049
adgrl3.1|XM_684028	29.6615	1.54	2.11447	0.726429	0.47	0.91	44.4226	15.1049
rfc1|NM_001089491	12.4647	1	3.07003	0.326808	0.74	0.95	16.7495	8.23904
rpl9|NM_001003861	987.452	-1.08	0.702942	-1.53294	0.13	0.91	639.395	1330.61
rpl9|XM_005170906	987.452	-1.08	0.702942	-1.53294	0.13	0.91	639.395	1330.61
rpl9|XM_005170907	1108.84	-1.07	0.692066	-1.54438	0.12	0.91	720.958	1491.27
lias|NM_001110401	54.0264	1.74	1.6675	1.04364	0.3	0.91	83.7476	24.7171
ugdh|NM_001110402	35.2247	0.87	1.91109	0.456319	0.65	0.94	45.8791	24.7171
ube2kb|NM_001008611	37.2799	-0.66	1.84632	-0.356249	0.72	0.95	29.1296	45.3147
pds5a|NM_200992	87.7984	0.2	1.26475	0.161641	0.87	0.98	94.6712	81.0172
pds5a|XM_005170916	87.7984	0.2	1.26475	0.161641	0.87	0.98	94.6712	81.0172
n4bp2|NM_001079967	11.786	-3.94	3.44519	-1.14224	0.25	0.91	1.45648	21.9708
si:dkeyp-26a9.2|XM_017356052	53.9122	0.45	1.56512	0.285333	0.78	0.96	62.6287	45.3147
si:dkeyp-26a9.2|XM_017356055	53.9122	0.45	1.56512	0.285333	0.78	0.96	62.6287	45.3147
fam184b|XM_005170920	64.1885	-0.29	1.44427	-0.197874	0.84	0.98	58.2592	70.0318
fam184b|NM_001201530	63.8269	-0.3	1.44819	-0.209871	0.83	0.97	57.531	70.0318
ncapg|NM_001256205	77.2431	1.65	1.44404	1.1424	0.25	0.91	117.975	37.0757
ncapg|XM_005170918	77.2431	1.65	1.44404	1.1424	0.25	0.91	117.975	37.0757
lcorl|XM_017356056	3.97729	4.97	6.12192	0.811282	0.42	0.91	8.01064	0
lcorl|XM_009291227	3.97729	4.97	6.12192	0.811282	0.42	0.91	8.01064	0
lcorl|XM_681643	57.1473	-0.26	1.51825	-0.169415	0.87	0.98	52.4333	61.7928
slit2|XM_009291092	60.763	-0.07	1.47634	-0.0471359	0.96	0.99	59.7157	61.7928
slit2|XM_009291088	60.763	-0.07	1.47634	-0.0471359	0.96	0.99	59.7157	61.7928
slit2|XM_009291085	60.763	-0.07	1.47634	-0.0471359	0.96	0.99	59.7157	61.7928
lrba|XM_002660442	43.9849	3.9	2.11834	1.83992	0.066	0.91	83.0194	5.49269
lrba|XM_009291242	43.9849	3.9	2.11834	1.83992	0.066	0.91	83.0194	5.49269
lrba|XM_009291244	43.9849	3.9	2.11834	1.83992	0.066	0.91	83.0194	5.49269
lrba|XM_009291248	43.9849	3.9	2.11834	1.83992	0.066	0.91	83.0194	5.49269
lrba|XM_017356061	43.9849	3.9	2.11834	1.83992	0.066	0.91	83.0194	5.49269
mab21l2|NM_152975	91.319	4.67	1.80404	2.58729	0.0097	0.91	176.962	6.86587
rps3a|NM_200059	1276.85	-1.02	0.675252	-1.51678	0.13	0.91	847.672	1699.99
gatb|NM_001013446	36.5251	-0.85	1.87221	-0.455515	0.65	0.94	26.2166	46.6879
dctpp1|NM_200771	92.1119	-1.26	1.30533	-0.966086	0.33	0.91	54.618	129.078
fbxw7|XM_005170948	136.217	-0.55	1.07417	-0.51041	0.61	0.93	111.421	160.661
fbxw7|XM_005170951	136.217	-0.55	1.07417	-0.51041	0.61	0.93	111.421	160.661
fbxw7|XM_005170952	136.217	-0.55	1.07417	-0.51041	0.61	0.93	111.421	160.661
fbxw7|XM_009291294	136.217	-0.55	1.07417	-0.51041	0.61	0.93	111.421	160.661
fbxw7|XM_009291299	136.217	-0.55	1.07417	-0.51041	0.61	0.93	111.421	160.661
tmem154|XM_005170905	9.73071	3.71	3.82936	0.968441	0.33	0.91	18.206	1.37317
tmem154|XM_009307741	9.73071	3.71	3.82936	0.968441	0.33	0.91	18.206	1.37317
mnd1|XM_005170917	23.6544	-0.15	2.25662	-0.0669189	0.95	0.99	22.5754	24.7171
si:ch211-208h7.4|XM_005170953	27.4287	1.04	2.14718	0.482817	0.63	0.93	37.1402	17.8513
si:ch211-208h7.4|XM_009291318	27.4287	1.04	2.14718	0.482817	0.63	0.93	37.1402	17.8513
si:ch211-208h7.4|XM_688724	27.4287	1.04	2.14718	0.482817	0.63	0.93	37.1402	17.8513
arfip1|XM_005170891	172.343	0.15	0.971068	0.158186	0.87	0.98	182.788	162.034
arfip1|XM_005170892	172.343	0.15	0.971068	0.158186	0.87	0.98	182.788	162.034
arfip1|XM_005170893	172.343	0.15	0.971068	0.158186	0.87	0.98	182.788	162.034
arfip1|NM_213368	36.4236	4.05	2.29533	1.76427	0.078	0.91	69.1828	4.11952
sfrp2|NM_001077384	132.633	1.17	1.141	1.02608	0.3	0.91	184.973	81.0172
plrg1|NM_213440	77.6935	0.48	1.34022	0.355095	0.72	0.95	91.03	64.5392
fgg|NM_213054	20.007	-0.94	2.45726	-0.380617	0.7	0.94	13.8366	26.0903
lrata|NM_001204131	8.25271	2.31	3.84318	0.601745	0.55	0.93	13.8366	2.74635
fabp2|XM_005170903	27.2574	2.21	2.26609	0.975929	0.33	0.91	45.1509	9.61221
fabp2|NM_131431	27.2574	2.21	2.26609	0.975929	0.33	0.91	45.1509	9.61221
myoz2b|XM_005170915	163.088	0.39	0.999123	0.392628	0.69	0.94	186.429	140.064
myoz2b|NM_200854	158.184	0.44	1.01272	0.436523	0.66	0.94	183.517	133.198
synpo2b|XM_017356099	293.19	-0.88	0.86223	-1.02497	0.31	0.91	207.548	377.623
si:ch211-145b13.5|XM_003197657	6.14672	5.59	5.18873	1.07824	0.28	0.91	12.3801	0
si:ch211-145b13.6|XM_002660467	9.03929	6.15	4.54523	1.35331	0.18	0.91	18.206	0
si:ch211-145b13.6|XM_009291602	9.03929	6.15	4.54523	1.35331	0.18	0.91	18.206	0
gpank1|NM_001327760	250.994	-0.72	0.885298	-0.815597	0.41	0.91	190.799	310.337
gpank1|NM_001327761	250.994	-0.72	0.885298	-0.815597	0.41	0.91	190.799	310.337
gpank1|XM_017355191	26.3884	-0.6	2.15451	-0.278886	0.78	0.96	21.119	31.583
gpank1|NM_001105703	26.3884	-0.6	2.15451	-0.278886	0.78	0.96	21.119	31.583
pdcd4a|XM_005159885	364.033	-0.52	0.780803	-0.663328	0.51	0.91	301.491	425.684
pdcd4a|NM_212988	364.033	-0.52	0.780803	-0.663328	0.51	0.91	301.491	425.684
mxd4|XM_682878	56.7033	-1.36	1.58682	-0.856109	0.39	0.91	32.0426	81.0172
ndufb6|NM_200808	402.867	-1.22	0.838376	-1.45998	0.14	0.91	243.232	560.255
mtap|NM_200554	90.8052	0.99	1.2921	0.765404	0.44	0.91	121.616	60.4196
tet2|XM_005159903	54.2928	1.45	1.63352	0.889948	0.37	0.91	80.1064	28.8366
ppa2|XM_005159884	42.9699	-0.46	1.72663	-0.267199	0.79	0.96	36.412	49.4342
ppa2|NM_205662	29.8455	-0.88	2.04957	-0.431629	0.67	0.94	21.119	38.4489
ints12|NM_001002161	38.9546	4.15	2.25939	1.83773	0.066	0.91	74.2805	4.11952
g3bp2|NM_001080563	105.135	3.3	1.52406	2.16641	0.03	0.91	192.255	19.2244
g3bp2|XM_017354913	104.412	3.29	1.52541	2.15731	0.031	0.91	190.799	19.2244
uso1|XM_009291480	73.0374	-0.23	1.36561	-0.167704	0.87	0.98	67.7263	78.2709
uso1|XM_009291483	73.0374	-0.23	1.36561	-0.167704	0.87	0.98	67.7263	78.2709
uso1|XM_009291485	73.0374	-0.23	1.36561	-0.167704	0.87	0.98	67.7263	78.2709
uso1|NM_200155	32.2496	-1.13	1.99431	-0.565572	0.57	0.93	20.3907	43.9415
coro2a|XM_005159876	4.33886	5.09	5.91692	0.860607	0.39	0.91	8.73888	0
coro2a|XM_005159877	4.33886	5.09	5.91692	0.860607	0.39	0.91	8.73888	0
coro2a|NM_199643	4.33886	5.09	5.91692	0.860607	0.39	0.91	8.73888	0
anp32b|NM_212603	245.685	0.39	0.868463	0.445196	0.66	0.94	280.372	211.469
anp32b|XM_005159865	245.685	0.39	0.868463	0.445196	0.66	0.94	280.372	211.469
anp32b|XM_017357537	47.9431	1.74	1.74833	0.993595	0.32	0.91	74.2805	21.9708
si:dkey-25o16.2|XM_005159909	159.681	-0.65	1.02021	-0.635728	0.52	0.92	125.257	193.617
si:dkey-25o16.2|XM_700557	159.681	-0.65	1.02021	-0.635728	0.52	0.92	125.257	193.617
si:dkey-25o16.4|XM_690920	41.2636	2.31	1.92583	1.20085	0.23	0.91	69.1828	13.7317
sh3gl2|NM_201116	6.50829	5.68	5.08331	1.11682	0.26	0.91	13.1083	0
pspc1|NM_001045258	145.009	-1.65	1.1596	-1.4214	0.16	0.91	70.6393	218.335
dnajb14|NM_001077787	10.0923	3.77	3.78286	0.995303	0.32	0.91	18.9342	1.37317
sgut1|NM_001007361	118.614	-0.55	1.13216	-0.487944	0.63	0.93	96.8559	140.064
chst10|XM_005159888	27.2067	-0.05	2.11627	-0.022567	0.98	1	26.9449	27.4635
chst10|XM_005159889	27.2067	-0.05	2.11627	-0.022567	0.98	1	26.9449	27.4635
chst10|XM_005159890	27.2067	-0.05	2.11627	-0.022567	0.98	1	26.9449	27.4635
chst10|XM_005159891	27.2067	-0.05	2.11627	-0.022567	0.98	1	26.9449	27.4635
chst10|XM_005159892	27.2067	-0.05	2.11627	-0.022567	0.98	1	26.9449	27.4635
chst10|NM_001003779	22.6331	0.06	2.3035	0.0280952	0.98	1	23.3037	21.9708
snapc3|XM_017351814	6.77471	1.18	4.08168	0.289141	0.77	0.96	9.46712	4.11952
snapc3|NM_201115	40.68	1.3	1.8263	0.711371	0.48	0.91	58.2592	23.3439
psip1|XM_005159894	72.4856	-0.59	1.38213	-0.427341	0.67	0.94	58.2592	86.5099
psip1|NM_001020726	72.4856	-0.59	1.38213	-0.427341	0.67	0.94	58.2592	86.5099
psip1|XM_005159893	72.4856	-0.59	1.38213	-0.427341	0.67	0.94	58.2592	86.5099
psip1|XM_009291548	72.4856	-0.59	1.38213	-0.427341	0.67	0.94	58.2592	86.5099
si:ch1073-440b2.1|XM_001340407	40.7117	1.42	1.83687	0.774284	0.44	0.91	59.7157	21.9708
LOC108190024|XR_001799233	17.3364	0.12	2.60588	0.047436	0.96	0.99	18.206	16.4781
ednrba|NM_131197	76.5009	-2.71	1.57386	-1.72372	0.085	0.91	20.3907	131.825
[truncated: 22,522 more rows]
