# Supplementary material for: Nr2f1a maintains atrial nkx2.5 expression to repress pacemaker identity within venous atrial cardiomyocytes of zebrafish
Source: eLife. 2023 May 15;12:e77408. doi: 10.7554/eLife.77408 (PMC10185342; doi:10.7554/eLife.77408)
Supplement: Supplementary file 2. [file elife-77408-supp2.xlsx]

## Sheet: Sheet1
	Supplemental Table 2. Antibody information.
		Antibody	Host	Manufacturer	Product	Dilution
	Primary	anti-atrial myosin heavy chain (Amhc/Myh6)	Mouse IgG1	DSHB	S 46	01:10:00
		anti-ventricular myosin heavy chain (Vmhc)	Rabbit	YenZym (Song et al.)	N/A	1:250
		anti-DsRed	Rabbit	Clontech	632496	1:1000
		anti-GFP	Chicken	Invitrogen	A10262	1:250
		anti-Nkx2.5	Rabbit	Gene Tex	128357	1:250
		anti-sarcomeric myosin heavy chain (Mhc)	Mouse IgG2b	DSHB	MF 20	1:10
		anti-RCFP	Rabbit	Clontech	632475	1:1000
		anti-Isl1	Rabbit	Gene Tex	128201	1:100
		anti-Isl1/2	Mouse IgG2b	DSHB	39.4D5	1:10
		anti-active caspase 3	Rabbit	BD Biosciences	559565	1:250
		anti-histone H3 (phospho S10)	Mouse IgG1	Abcam	ab 14955	1:250
	Secondary	anti-mouse IgG1 DyLight™ 405	Goat	BioLegend	409109	1:250
		anti-mouse IgG1 Alexa Fluor® 488	Goat	Southern Biotech	1070-30	1:250
		anti-rabbit IgG Alexa Fluor 488	Goat	Invitrogen	A11008	1:500
		anti-rabbit IgG TRITC	Goat	Southern Biotech	4050-03	1:100
		anti-chicken IgY Alexa Fluor 488	Goat	Invitrogen	A11039	1:500
		anti-rabbit IgG Alexa Fluor® 647	Goat	Southern Biotech	4050-31	1:100
		anti-mouse IgG2b Alexa Fluor® 647	Goat	Southern Biotech	1091-31	1:250
		anti-mouse IgG2b TRITC	Goat	Southern Biotech	1090-03	1:100
